# Supplementary material for: Moxibustion inhibits inflammation in monosodium urate crystal-induced gouty arthritis model rats through metabolomic regulation
Source: Front Mol Biosci. 2025 Mar 3;12:1433912. doi: 10.3389/fmolb.2025.1433912 (PMC11911207; doi:10.3389/fmolb.2025.1433912)
Supplement: Supplementary file 2 [file Table3.xlsx]

## Sheet: Quality control data sheet
ID	Metabolite	代谢物	Metab ID	level	KEGG Pathway ID	KEGG Pathway Description	Library ID	Adducts	Formula	Retention time	通路	KEGG Compound ID	Mode	KEGG Compound First Category	KEGG Compound Second Category	KEGG Pathway First Category	KEGG Pathway Second Category	HMDB Superclass	HMDB Class	M/Z	RSD	Fragmentation Score	Theoretical Fragmentation Score	Mass Error	CAS ID	HMDB Subclass	Con1	Con2	Con3	Con4	Con5	Con6	AGA1	AGA2	AGA3	AGA4	AGA5	AGA6	AGA7	AGA8	Col1	Col2	Col3	Col4	Col5	Col6	Col7	Col8	Mox1
pos_1	3a,7b,12a-Trihydroxy-5a-Cholanoic acid	3a，7b，12a -三羟基- 5a -胆酸	metab_0	B(ii)	map00140	Steroid hormone biosynthesis	HMDB0000432	M+H-2H2O, 2M+Na, 2M+NH4, 2M+H, M+H-H2O, M+H, M+NH4	C24H40O5	6.2754	类固醇激素生物合成	C02373	pos	-	-	Metabolism	Lipid metabolism	Organic oxygen compounds	Organooxygen compounds	834.605	0.0503091839151	0	87	-5.46996	63324-19-6	Carbonyl compounds	7.446	7.279	7.252	7.331	7.557	7.396	7.585	7.525	7.589	7.408	7.373	7.515	7.691	7.759	7.308	7.655	7.549	7.208	7.915	7.523	7.618	7.333	7.684
pos_10001	(3S)-3,6-Diaminohexanoate	（3S）-3,6-二氨基己酸酯	metab_5	B(ii)	map01100;map00310	Metabolic pathways;Lysine degradation	HMDB0012114	M+ACN+H	C6H14N2O2	0.6138	代谢途径;赖氨酸降解	C01142	pos	-	-	Metabolism;Metabolism	Global and overview maps;Amino acid metabolism	Organic acids and derivatives	Carboxylic acids and derivatives	188.139	0.131629	0	38	-1.64801	4299-56-3	Amino acids, peptides, and analogues	4.675	4.757	4.767	4.806	4.586	4.674	4.607	4.763	4.785	4.684	4.791	4.743	4.932	4.708	4.656	4.79	4.811	4.888	5.154	4.587	4.672	4.892	4.675
pos_10002	D-Ornithine	D-鸟氨酸	metab_6	B(ii)	map01100;map00470	Metabolic pathways;D-Amino acid metabolism	HMDB0003374;PW_C001864	M+ACN+H	C5H12N2O2	0.6138	代谢途径;D-氨基酸代谢	C00515	pos	-	-	Metabolism;Metabolism	Global and overview maps;Metabolism of other amino acids	Organic acids and derivatives	Carboxylic acids and derivatives	174.123	0.206775	0	58.9	-2.44791	348-66-3	Amino acids, peptides, and analogues	3.875	3.383	3.914	3.415	3.205	3.306	3.985	3.57	3.425	3.25	3.516	3.31	3.319	3.71	3.842	3.663	3.848	3.473	4.136	3.511	3.05	3.443	3.666
pos_10012	Glycerylphosphorylcholine	甘油磷脂酰胆碱	metab_17	B(ii)	map00565;map00564;map05231	Ether lipid metabolism;Glycerophospholipid metabolism;Choline metabolism in cancer	HMDB0000086;HMDB0252858	M+Na	C8H20NO6P	0.6085	醚脂代谢;甘油磷脂代谢;癌症的胆碱代谢	C00670	pos	-	-	Metabolism;Metabolism;Human Diseases	Lipid metabolism;Lipid metabolism;Cancer: overview	Lipids and lipid-like molecules	Glycerophospholipids	280.091	0.0526217618147	0	73	-2.12504	28319-77-9	Glycerophosphocholines	5.79	5.7	5.853	5.809	5.752	5.758	5.807	5.615	5.545	6.027	5.851	5.894	5.617	5.984	5.662	5.722	5.725	5.433	6.168	5.682	5.464	5.553	5.862
pos_10019	N8-Acetylspermidine	N8 -乙酰亚精胺	metab_24	B(i)	-	-	HMDB0002189	M+H	C9H21N3O	0.6085	-	C01029	pos	-	-	-	-	Organic acids and derivatives	Carboximidic acids and derivatives	188.175	0.10493	36.4	0	-2.21776	13431-24-8	Carboximidic acids	3.972	3.873	4.016	4.017	4.301	4.05	3.705	4.281	4.148	3.817	4.007	3.96	4.212	3.846	3.906	4.033	3.888	4.291	4.379	3.535	4.354	4.126	4.057
pos_1004	Crithmumdiol	-	metab_47	B(ii)	-	-	HMDB0033957	M+H, M+CH3OH+H	C17H26O2	6.2965	-	-	pos	-	-	-	-	Lipids and lipid-like molecules	Fatty Acyls	263.2	0.0965340732223	0	51.3	-1.28662	-	Fatty alcohols	4.941	4.567	4.636	4.412	4.776	4.674	5.208	4.53	5.125	4.842	4.748	4.699	4.637	4.643	5.005	4.898	5.043	4.9	3.919	5.033	4.901	4.884	4.736
pos_10055	Asparagine-betaxanthin	天冬酰胺-甜菜黄素	metab_64	B(ii)	-	-	HMDB0304648	M+Na	C13H15N3O7	0.5978	-	-	pos	-	-	-	-	Organic acids and derivatives	Carboxylic acids and derivatives	348.079	0.0443574890489	0	48.5	-4.24361	-	Amino acids, peptides, and analogues	4.551	4.461	4.698	4.601	4.548	4.537	4.618	4.316	4.194	4.779	4.606	4.666	4.247	4.752	4.425	4.549	4.463	4.105	4.985	4.418	4.19	4.322	4.655
pos_10057	Glycerophosphocholine	甘油磷酸胆碱	metab_66	B(ii)	map00565;map00564;map05231	Ether lipid metabolism;Glycerophospholipid metabolism;Choline metabolism in cancer	HMDB0008291;HMDB0007994;HMDB0008393;HMDB0008061;HMDB0007928;HMDB0008557;HMDB0008160;HMDB0008357;HMDB0008159;HMDB0011224;HMDB0007896;HMDB0008227;HMDB0008391;HMDB0008062;HMDB0000086;HMDB0007895;HMDB0008060;HMDB0008392;HMDB0008128;HMDB0008787;HMDB0008654;HMDB0008818;HMDB0008325;HMDB0008194;HMDB0008456;HMDB0008653;HMDB0008554;HMDB0008063;HMDB0008489;HMDB0008619;HMDB0008720;HMDB0008424;HMDB0007962;HMD…	M+K	C8H20NO6P	0.5978	醚脂代谢;甘油磷脂代谢;癌症的胆碱代谢	C00670	pos	-	-	Metabolism;Metabolism;Human Diseases	Lipid metabolism;Lipid metabolism;Cancer: overview	Lipids and lipid-like molecules	Glycerophospholipids	296.065	0.0918006352126	0	43	-2.39725	28319-77-9	Glycerophosphocholines	4.954	4.884	5.014	5.046	5.024	5.001	5.028	4.832	4.634	5.217	5.075	5.074	4.829	5.174	4.825	4.897	4.86	4.699	5.384	4.841	4.683	4.785	5.043
pos_10076	PE-NMe(20:2(11Z,14Z)/18:1(11Z))	-	metab_87	B(ii)	-	-	HMDB0113343;PW_C059467	M+2H	C44H82NO8P	0.5925	-	C01241	pos	-	-	-	-	Lipids and lipid-like molecules	Glycerophospholipids	392.795	0.0738360748333	0	35.4	-3.34761	-	Glycerophosphoethanolamines	5.436	5.432	5.486	5.45	5.489	5.487	5.404	5.461	5.395	5.48	5.439	5.456	5.456	5.473	5.441	5.423	5.443	5.393	5.597	5.411	5.392	5.374	5.463
pos_10108	3-Methyl-1-butylamine	3 -甲基- 1 -丁胺	metab_123	B(ii)	-	-	HMDB0031659	M+ACN+H	C5H13N	0.5872	-	C02640	pos	-	-	-	-	Organic nitrogen compounds	Organonitrogen compounds	129.138	0.179269	0	68.9	-2.00902	107-85-7	Amines	3.821	3.913	3.872	3.469	3.946	3.67	4.106	3.806	3.49	4.003	3.699	3.924	3.667	3.703	4.004	4.055	3.991	3.772	4.076	4.163	3.819	3.967	3.682
pos_10132	Spermine	精胺	metab_150	B(i)	map01100;map00480;map00770;map01240;map00330;map04976;map00410	Metabolic pathways;Glutathione metabolism;Pantothenate and CoA biosynthesis;Biosynthesis of cofactors;Arginine and proline metabolism;Bile secretion;beta-Alanine metabolism	HMDB0001256;PW_C000970	M+H	C10H26N4	0.5819	代谢途径;谷胱甘肽代谢;泛酸和CoA生物合成;辅助因子的生物合成;精氨酸和脯氨酸代谢;胆汁分泌;β-丙氨酸代谢	C00750	pos	-	-	Metabolism;Metabolism;Metabolism;Metabolism;Metabolism;Organismal Systems;Metabolism	Global and overview maps;Metabolism of other amino acids;Metabolism of cofactors and vitamins;Global and overview maps;Amino acid metabolism;Digestive system;Metabolism of other amino acids	Organic nitrogen compounds	Organonitrogen compounds	203.223	0.0786418256412	77.2	0	-1.76804	71-44-3	Amines	4.384	4.609	4.287	3.685	4.433	4.335	4.958	4.307	4.06	4.584	4.168	4.593	4.276	4.2	4.801	4.668	4.658	4.288	4.491	5.001	4.517	4.661	4.366
pos_102	Cyclopropyl-[(3S,4S)-3-(dimethylamino)-4-(hydroxymethyl)piperidin-1-yl]methanone	-	metab_224	B(i)	-	-	-	M+H, M+Na, M+H-H2O	C12H22N2O2	3.5777	-	-	pos	-	-	-	-	-	-	227.175	0.0830218784907	37.9	0	-1.55801	-	-	6.918	6.914	6.924	6.889	6.905	6.929	6.937	6.903	6.909	6.937	6.919	6.923	6.907	6.907	6.931	6.938	6.898	6.919	7.062	6.968	6.926	6.937	6.95
pos_10256	Inosinic acid	肌苷酸	metab_287	B(ii)	map01100;map00230;map01240;map01232;map01523;map04742	Metabolic pathways;Purine metabolism;Biosynthesis of cofactors;Nucleotide metabolism;Antifolate resistance;Taste transduction	HMDB0000175;HMDB0257686;PW_C000114	M+H-2H2O	C10H13N4O8P	0.5343	代谢途径;嘌呤代谢;辅助因子的生物合成;核苷酸代谢;抗叶酸制剂耐药性;味觉转导	C00130	pos	-	-	Metabolism;Metabolism;Metabolism;Metabolism;Human Diseases;Organismal Systems	Global and overview maps;Nucleotide metabolism;Global and overview maps;Global and overview maps;Drug resistance: antineoplastic;Sensory system	Nucleosides, nucleotides, and analogues	Purine nucleotides	313.035	0.0291427584143	0	50.4	5.775081348037388	131-99-7	Purine ribonucleotides	5.6	5.137	5.428	5.27	5.186	5.361	5.573	5.18	5.244	5.302	5.325	5.317	5.157	5.394	5.63	5.15	5.394	5.014	5.545	5.213	5.018	4.993	5.35
pos_10286	Lactosamine	氨基乳糖苷	metab_320	B(ii)	map01100;map00520;map00512;map01250	Metabolic pathways;Amino sugar and nucleotide sugar metabolism;Mucin type O-glycan biosynthesis;Biosynthesis of nucleotide sugars	HMDB0006591	M+NH4	C12H23NO10	0.5237	代谢途径;氨基糖和核苷酸糖代谢;粘蛋白型O-聚糖生物合成;核苷酸糖的生物合成	C00203	pos	-	-	Metabolism;Metabolism;Metabolism;Metabolism	Global and overview maps;Carbohydrate metabolism;Glycan biosynthesis and metabolism;Global and overview maps	Lipids and lipid-like molecules	Fatty Acyls	359.163	0.0705511343958	0	33.3	-7.58159	13000-25-4	Fatty acyl glycosides	3.891	3.775	3.863	4.252	3.751	3.992	3.773	3.988	4.411	4.164	4.412	4.018	4.225	3.949	4.129	3.907	4.048	4.092	4.138	3.778	4.07	4.324	4.145
pos_10293	Queuine	奎因	metab_328	B(ii)	-	-	HMDB0001495	M+NH4	C12H15N5O3	0.5184	-	C01449	pos	-	-	-	-	Organoheterocyclic compounds	Pyrrolopyrimidines	295.149	0.132338	0	43	-6.87673	72496-59-4	Pyrrolo[2,3-d]pyrimidines	4.291	3.634	4.031	3.684	3.696	3.934	4.356	3.843	3.83	3.852	3.908	4.018	3.82	4.001	4.248	3.812	4.016	3.71	4.123	3.977	3.687	3.654	3.834
pos_10295	Galactosylhydroxylysine	半乳糖羟赖氨酸	metab_330	B(ii)	-	-	HMDB0246151;HMDB0242167;HMDB0000600	M+H	C12H24N2O8	0.5131	-	C05547	pos	-	-	-	-	Benzenoids	Phenol ethers	325.16	0.134071	0	76.7	-1.65246	32448-36-5	Anisoles	3.69	3.48	3.611	3.611	3.689	3.593	3.617	3.61	3.566	3.607	3.681	3.765	3.636	3.677	3.508	3.595	3.612	3.691	3.761	3.533	3.681	3.6	3.48
pos_103	Indoleacrylic acid	吲哚丙烯酸	metab_335	B(ii)	-	-	HMDB0000734	M+H, M+NH4, M+H-H2O	C11H9NO2	3.6955	-	-	pos	-	-	-	-	Organoheterocyclic compounds	Indoles and derivatives	188.07	0.107013	0	42.1	-1.80887	29953-71-7	Indoles	7.851	7.692	7.856	7.75	7.905	7.854	7.834	7.857	7.84	7.863	7.954	7.881	7.966	7.967	7.932	7.891	7.938	7.97	8	7.862	7.878	7.844	7.911
pos_1030	Ser Leu Leu Ser Phe	-	metab_336	B(i)	-	-	-	M+H, M+Na	C27H43N5O8	6.3177	-	-	pos	-	-	-	-	-	-	566.323	0.0221976173409	33.8	0	8.112606084254951	-	-	5.398	5.351	5.098	5.403	5.45	5.366	5.501	5.213	5.308	5.39	5.337	5.319	5.262	5.083	5.189	5.33	5.116	5.291	5.271	5.193	5.285	5.293	5.267
pos_10300	Pipecolic Acid	哌可酸	metab_337	B(i)	map01100;map00310	Metabolic pathways;Lysine degradation	HMDB0000716;HMDB0000070;MJDBOTE0000664	M+H	C6H11NO2	0.5131	代谢途径;赖氨酸降解	C00408	pos	-	-	Metabolism;Metabolism	Global and overview maps;Amino acid metabolism	Organic acids and derivatives	Carboxylic acids and derivatives	130.086	0.0210951422644	91.8	0	-1.85918	3105-95-1;535-75-1	Amino acids, peptides, and analogues	5.358	5.319	5.312	5.454	5.286	5.347	5.287	5.327	5.513	5.411	5.488	5.408	5.396	5.359	5.372	5.306	5.35	5.339	5.502	5.248	5.361	5.43	5.354
pos_10301	3-Methoxypropylamine	3-甲氧基丙胺	metab_338	B(ii)	-	-	HMDB0245920	M+H-H2O	C4H11NO	0.5131	-	-	pos	-	-	-	-	Organic oxygen compounds	Organooxygen compounds	72.0807	0.0561925470749	0	30.9	-0.696363	-	Ethers	4.164	4.133	3.952	3.908	4.059	4.1	4.193	4.03	3.957	4.132	4.015	4.115	3.913	4.049	4.11	4.208	4.156	3.968	4.245	4.221	4.117	4.107	4.076
pos_1037	PC(20:3(6,8,11)-OH(5)/16:0)	-	metab_412	B(ii)	-	-	HMDB0285994	M+H-H2O, M+CH3OH+H	C44H82NO9P	6.3177	-	-	pos	-	-	-	-	Not Available	Not Available	782.568	0.0515176	0	32	-2.14648	-	Not Available	8.604	8.546	8.635	8.557	8.652	8.59	8.607	8.594	8.592	8.587	8.523	8.581	8.489	8.567	8.588	8.495	8.493	8.496	8.81	8.52	8.52	8.56	8.573
pos_104	P-CHLOROPHENYLALANINE	-	metab_445	B(i)	-	-	HMDB0033261	M+H, M+Na, M+2Na-H	C9H10ClNO2	3.7562	-	-	pos	-	-	-	-	Phenylpropanoids and polyketides	2-arylbenzofuran flavonoids	200.047	0.0831583871477	94.5	0	-1.75472	101365-03-1	Not Available	8.241	8.227	8.267	8.218	8.248	8.244	8.284	8.25	8.292	8.249	8.263	8.238	8.265	8.27	8.297	8.284	8.253	8.257	8.402	8.303	8.259	8.272	8.302
pos_1057	SM(d16:1/26:1)	-	metab_490	B(i)	-	-	-	M+H, M+Na	C47H93N2O6P	6.3495	-	-	pos	-	-	-	-	-	-	813.683	0.277179	74.8	0	-2.27457	-	-	6.417	3.163	6.709	6.847	6.95	6.883	6.859	6.673	6.835	6.964	6.834	6.704	6.817	6.738	6.426	4.243	6.637	6.765	7.165	6.717	6.702	6.706	6.75
pos_106	2-Amino-3-methylpentanal	2 -氨基- 3 -甲基戊醛	metab_493	B(ii)	-	-	HMDB0257959	M+H-H2O, 2M+ACN+H, M+H	C6H13NO	3.842	-	-	pos	-	-	-	-	Organic nitrogen compounds	Organonitrogen compounds	272.233	0.0203580592744	0	45	-1.50691	-	Amines	5.58	5.581	5.564	5.549	5.574	5.569	5.61	5.539	5.567	5.591	5.542	5.574	5.538	5.541	5.59	5.573	5.557	5.543	5.692	5.62	5.58	5.547	5.577
pos_1060	Tributyl citrate	柠檬酸三丁酯	metab_494	B(i)	-	-	-	M+H, M+Na	C18H32O7	6.3548	-	-	pos	-	-	-	-	-	-	361.222	0.0349768413412	64.4	0	-0.425072	-	-	5.615	5.584	5.598	5.543	5.533	5.543	5.62	5.497	5.585	5.631	5.578	5.63	5.62	5.636	5.659	5.627	5.598	5.525	5.8	5.638	5.581	5.569	5.594
pos_1066	Scillipheosidin 3-[glucosyl-(1->2)-rhamnoside]	Scillipheosidin 3-[葡萄糖基-（1->2）-鼠李糖苷]	metab_500	B(ii)	-	-	HMDB0036946	M+NH4, M+Na	C36H52O14	6.3601	-	-	pos	-	-	-	-	Lipids and lipid-like molecules	Steroids and steroid derivatives	726.375	0.0168588972473	0	32.1	8.12914551294103	261158-68-3	Steroid lactones	6.248	6.312	6.288	6.371	6.199	6.234	5.841	6.236	6.214	6.277	6.304	6.285	6.303	6.339	6.277	6.25	6.26	6.404	3.589	6.104	6.196	6.271	6.262
pos_1074	PG(i-15:0/18:1(12Z)-O(9S,10R))	-	metab_509	B(ii)	-	-	HMDB0271416	M+NH4, M+Na	C39H73O11P	6.376	-	-	pos	-	-	-	-	Not Available	Not Available	766.53	0.0107355924475	0	70.7	9.4235442370288	-	Not Available	6.723	6.679	6.709	6.623	6.683	6.67	6.755	6.625	6.67	6.694	6.662	6.67	6.668	6.675	6.707	6.719	6.648	6.59	6.91	6.763	6.658	6.647	6.667
pos_1075	LysoPC(14:0/0:0)	-	metab_510	B(ii)	map00564;map05231	Glycerophospholipid metabolism;Choline metabolism in cancer	PW_C006388;HMDB0010379	M+H, M+Na	C22H46NO7P	6.3813	甘油磷脂代谢;癌症的胆碱代谢	C04230	pos	Lipids	Phospholipids	Metabolism;Human Diseases	Lipid metabolism;Cancer: overview	Lipids and lipid-like molecules	Glycerophospholipids	468.308	0.0339470577053	0	87.5	-1.8248	20559-16-4	Glycerophosphocholines	6.817	6.73	6.775	6.499	6.816	6.75	6.818	6.57	6.574	6.915	6.79	6.814	6.726	6.954	6.705	6.84	6.715	6.653	7.08	6.794	6.697	6.551	6.986
pos_1080	PG(i-13:0/18:2(9Z,11Z))	-	metab_516	B(ii)	map01100;map00564	Metabolic pathways;Glycerophospholipid metabolism	HMDB0116672;PW_C076290	M+NH4, M+Na	C37H69O10P	6.3867	代谢途径;甘油磷脂代谢	C00344	pos	Lipids	Phospholipids	Metabolism;Metabolism	Global and overview maps;Lipid metabolism	Lipids and lipid-like molecules	Glycerophospholipids	722.503	0.0204023691777	0	68.2	9.649800318719473	-	Glycerophosphoglycerols	7.127	7.11	7.137	7.054	7.088	7.105	7.138	7.06	7.093	7.115	7.091	7.096	7.097	7.103	7.133	7.131	7.068	7.04	7.293	7.158	7.096	7.079	7.095
pos_1084	LysoPC(16:1(9Z)/0:0)	-	metab_520	B(ii)	map00564;map05231	Glycerophospholipid metabolism;Choline metabolism in cancer	HMDB0010383	M+H, M+Na	C24H48NO7P	6.4027	甘油磷脂代谢;癌症的胆碱代谢	C04230	pos	Lipids	Phospholipids	Metabolism;Human Diseases	Lipid metabolism;Cancer: overview	Lipids and lipid-like molecules	Glycerophospholipids	494.323	0.0160626774389	0	91.2	-1.82697	76790-27-7	Glycerophosphocholines	6.975	6.795	6.769	6.671	7.059	6.915	7.224	6.738	6.71	6.91	6.944	6.944	6.755	6.826	6.782	7.147	6.772	6.909	7.026	6.949	6.733	6.634	7.113
pos_1087	Dmap-ethyl-paf	-	metab_523	B(ii)	-	-	HMDB0251534	M+NH4, M+Na	C30H57N2O6P	6.4132	-	-	pos	-	-	-	-	Organoheterocyclic compounds	Pyridines and derivatives	590.425	0.0152836761579	0	49.6	-7.08364	-	Aminopyridines and derivatives	6.802	6.771	6.816	6.719	6.769	6.784	6.826	6.731	6.782	6.765	6.75	6.783	6.774	6.794	6.812	6.806	6.761	6.709	6.983	6.841	6.79	6.761	6.791
pos_1091	Gingerglycolipid A	姜糖脂A	metab_528	B(ii)	-	-	HMDB0041093;LMGL04010019	M+NH4, M+Na	C33H56O14	6.4292	-	-	pos	-	-	-	-	Lipids and lipid-like molecules	Glycerolipids	694.403	0.0397085360359	0	34.6	3.17468272500881	145937-22-0	Glycosylglycerols	6.996	7.033	7.029	7.074	6.946	7.024	6.562	6.976	6.931	6.984	7.016	7.015	7.056	7.034	6.991	6.951	6.982	7.172	3.276	6.833	6.975	7.01	7.007
pos_1115	Acetolein	乙酰胆碱	metab_555	B(ii)	-	-	HMDB0303184	M+H, M+NH4	C25H44O6	6.4503	-	-	pos	-	-	-	-	Lipids and lipid-like molecules	Glycerolipids	458.347	0.0193513	0	42	-1.69709	-	Triradylcglycerols	5.982	5.962	5.999	5.89	5.935	5.959	6.043	5.889	5.954	5.959	5.911	5.941	5.957	5.993	5.987	6.025	5.945	5.906	6.233	6.031	5.998	5.944	5.992
pos_1120	(3S,3'S,5R,5'R,6R)-3,6-Epoxy-5,6-dihydro-3',5,8'-trihydroxy-beta,kappa-caroten-6'-one	（3S，3'S，5R，5'R，6R）-3,6-环氧-5,6-二氢-3'，5,8'-三羟基-β，κ-胡萝卜素-6'-酮	metab_561	B(ii)	-	-	HMDB0037795	M+NH4, M+Na	C40H56O5	6.4079	-	-	pos	-	-	-	-	Lipids and lipid-like molecules	Prenol lipids	634.451	0.0275544813261	0	40.8	7.28337380599679	256505-53-0	Tetraterpenoids	6.902	6.881	6.888	6.839	6.862	6.886	6.887	6.836	6.886	6.875	6.851	6.884	6.88	6.895	6.913	6.89	6.863	6.807	7.036	6.918	6.872	6.857	6.89
pos_1121	PC(18:3/0:0)	-	metab_562	B(i)	-	-	LMGP01050038;HMDB0010388	M+H, M+Na	C26H48NO7P	6.3601	-	-	pos	-	-	-	-	Lipids and lipid-like molecules	Glycerophospholipids	518.323	0.0249481692243	88.7	0	-1.76487	-	Glycerophosphocholines	6.579	6.547	6.594	6.56	6.584	6.549	6.673	6.451	6.571	6.774	6.701	6.584	6.505	6.754	6.59	6.674	6.616	6.502	6.934	6.671	6.586	6.435	6.706
pos_1124	7',8'-Dihydro-8'-hydroxycitraniaxanthin	7 '，8 ' -二氢- 8 ' -羟基肉桂黄素	metab_565	B(ii)	-	-	HMDB0036884	M+H-H2O, M+H	C33H44O3	6.5143	-	-	pos	-	-	-	-	Lipids and lipid-like molecules	Prenol lipids	471.328	0.0478382	0	37.2	4.64617706557865	15446-86-3	Triterpenoids	5.481	5.46	5.5	5.455	5.432	5.501	5.506	5.474	5.484	5.389	5.463	5.478	5.533	5.437	5.526	5.482	5.47	5.471	5.564	5.549	5.505	5.495	5.464
pos_1126	LysoPC(16:0/0:0)	-	metab_567	B(ii)	map00564;map05231	Glycerophospholipid metabolism;Choline metabolism in cancer	HMDB0010382	M+H, M+Na	C24H50NO7P	6.5089	甘油磷脂代谢;癌症的胆碱代谢	C04230	pos	Lipids	Phospholipids	Metabolism;Human Diseases	Lipid metabolism;Cancer: overview	Lipids and lipid-like molecules	Glycerophospholipids	496.339	0.00321206251813	0	90.2	-1.76668	17364-16-8	Glycerophosphocholines	8.154	8.157	8.156	8.12	8.122	8.156	8.134	8.068	8.132	8.183	8.116	8.118	8.106	8.182	8.113	8.135	8.098	8.056	8.313	8.122	8.108	8.071	8.196
pos_1130	PE(16:0/0:0)	-	metab_572	B(i)	-	-	LMGP02050002;HMDB0011503	M+H-H2O, M+H	C21H44NO7P	6.5408	-	-	pos	-	-	-	-	Lipids and lipid-like molecules	Glycerophospholipids	454.292	0.0180874432493	98.4	0	-1.69572	53862-35-4	Glycerophosphoethanolamines	6.158	6.146	6.109	6.196	6.12	6.155	6.186	6.182	6.221	6.233	6.222	6.158	6.095	6.144	6.111	6.201	6.189	6.154	6.363	6.183	6.076	6.141	6.161
pos_1147	LysoPC(P-18:1(9Z)/0:0)	-	metab_590	B(ii)	map00564;map05231	Glycerophospholipid metabolism;Choline metabolism in cancer	HMDB0010408	M+H, M+Na	C26H52NO6P	6.5834	甘油磷脂代谢;癌症的胆碱代谢	C04230	pos	Lipids	Phospholipids	Metabolism;Human Diseases	Lipid metabolism;Cancer: overview	Lipids and lipid-like molecules	Glycerophospholipids	506.36	0.0624399567617	0	34.8	-1.39639	-	Glycerophosphocholines	5.267	5.189	5.193	5.142	5.013	5.151	5.261	4.867	5.145	5.253	5.12	5.208	4.877	5.314	5.111	5.107	5.066	4.903	5.553	5.011	5.039	4.93	5.315
pos_1151	PC(17:0/0:0)	-	metab_595	B(i)	map00564;map05231	Glycerophospholipid metabolism;Choline metabolism in cancer	LMGP01050024;HMDB0012108	M+H, M+Na	C25H52NO7P	6.5888	甘油磷脂代谢;癌症的胆碱代谢	C04230	pos	Lipids	Phospholipids	Metabolism;Human Diseases	Lipid metabolism;Cancer: overview	Lipids and lipid-like molecules	Glycerophospholipids	510.355	0.0240403993687	90.7	0	-1.71939	50930-23-9	Glycerophosphocholines	7.261	7.097	7.286	7.274	7.086	7.214	7.091	6.986	7.018	7.261	7.216	7.214	7.202	7.304	7.195	7.12	7.152	7.032	7.424	7.141	7.191	7.021	7.219
pos_1154	PE(P-16:0/0:0)	-	metab_598	B(i)	-	-	LMGP02070001	M+H, M+Na	C21H44NO6P	6.5993	-	-	pos	-	-	-	-	-	-	438.297	0.0547298004988	70.9	0	-1.83257	-	-	6.065	5.98	6.004	6.039	5.865	5.997	6.098	5.82	6.07	6.111	6.146	6.119	5.896	6.115	5.999	6.021	6.115	5.805	6.156	6.089	5.814	6.015	6.058
pos_1158	LysoPE(P-18:1(9Z)/0:0)	-	metab_602	B(ii)	-	-	HMDB0240599	M+H, M+Na	C23H46NO6P	6.6098	-	-	pos	-	-	-	-	Lipids and lipid-like molecules	Glycerophospholipids	464.313	0.0503446174185	0	63.9	-1.76645	1425046-04-3	Glycerophosphoethanolamines	6.164	6.056	6.072	6.091	5.898	6.066	6.281	5.848	6.11	6.2	6.239	6.195	5.922	6.133	6.082	6.08	6.174	5.926	6.217	6.201	5.862	6.095	6.039
pos_1161	1-Heptadecanoylglycerophosphoethanolamine	1 -十七酰甘油磷酰乙醇胺	metab_606	B(ii)	-	-	HMDB0061691	M+H, M+Na	C22H46NO7P	6.6046	-	-	pos	-	-	-	-	Lipids and lipid-like molecules	Glycerophospholipids	468.307	0.122368	0	64.8	-2.18507	-	Glycerophosphoethanolamines	5.088	4.857	4.998	5.184	4.887	5.029	4.897	4.972	4.893	5.119	5.11	5.063	5.01	5.102	5.154	4.977	5.02	4.962	5.287	5.015	5.022	4.897	4.966
pos_1168	Alpha-Terpineol propanoate	-	metab_613	B(ii)	-	-	HMDB0032052	M+H-H2O, M+NH4	C13H22O2	6.6418	-	-	pos	-	-	-	-	Lipids and lipid-like molecules	Prenol lipids	228.195	0.10326	0	36	-1.79141	80-27-3	Monoterpenoids	4.26	4.603	4.066	3.933	4.425	4.915	4.599	4.042	4.632	4.299	3.903	3.932	4.368	4.159	4.429	4.199	4.021	4.549	4.286	4.62	4.457	4.286	4.295
pos_1176	Gly-Pro-Arg-Pro-Lys	甘氨酰-脯氨酰-精氨酸-脯氨酰-赖氨酸	metab_622	B(ii)	-	-	HMDB0252830	M+H-2H2O, M+ACN+H	C24H43N9O6	6.6952	-	-	pos	-	-	-	-	Organic acids and derivatives	Carboxylic acids and derivatives	518.321	0.0871484179429	0	79.3	2.4712090952226298	-	Amino acids, peptides, and analogues	5.329	5.304	5.268	5.088	5.128	5.268	5.177	4.993	5.266	5.325	5.357	5.224	5.361	5.231	5.271	5.4	5.362	5.367	5.633	5.522	5.289	5.05	5.261
pos_1181	GPCho(16:0/20:3)	-	metab_628	B(i)	map01100;map00564;map00590;map00591;map00592;map05231;map04723	Metabolic pathways;Glycerophospholipid metabolism;Arachidonic acid metabolism;Linoleic acid metabolism;alpha-Linolenic acid metabolism;Choline metabolism in cancer;Retrograde endocannabinoid signaling	HMDB0007981;HMDB0007980;HMDB0011218;HMDB0039527;HMDB0011219	M+H, M+CH3OH+H	C44H82NO8P	6.6952	代谢途径;甘油磷脂代谢;花生四烯酸代谢;亚油酸代谢;α-亚麻酸代谢;癌症的胆碱代谢;逆行内源性大麻素信号传导	C00157	pos	Lipids	Phospholipids	Metabolism;Metabolism;Metabolism;Metabolism;Metabolism;Human Diseases;Organismal Systems	Global and overview maps;Lipid metabolism;Lipid metabolism;Lipid metabolism;Lipid metabolism;Cancer: overview;Nervous system	Lipids and lipid-like molecules	Glycerophospholipids	784.582	0.106063	37.8	0	-3.70018	155575-01-2	Glycerophosphocholines	7.098	7.104	7.045	6.827	6.92	7.066	6.987	7.065	7.03	6.942	7.083	7.068	7.116	6.953	7.096	7.034	7.149	7	7.202	7.146	7.079	6.92	6.872
pos_1183	PC(18:0/0:0)	-	metab_630	B(i)	map00564;map05231	Glycerophospholipid metabolism;Choline metabolism in cancer	HMDB0010384;LMGP01050026	M+Na, M+K	C26H54NO7P	6.6898	甘油磷脂代谢;癌症的胆碱代谢	C04230	pos	Lipids	Phospholipids	Metabolism;Human Diseases	Lipid metabolism;Cancer: overview	Lipids and lipid-like molecules	Glycerophospholipids	546.352	0.122339	93.9	0	-1.68248	19420-57-6	Glycerophosphocholines	7.309	7.275	7.294	7.193	7.224	7.285	7.246	7.092	7.246	7.298	7.321	7.249	7.289	7.254	7.287	7.34	7.306	7.257	7.459	7.414	7.249	7.2	7.238
pos_1190	PE(P-18:0/0:0)	-	metab_638	B(i)	-	-	HMDB0240598;LMGP02070002	M+H, M+Na	C23H48NO6P	6.7591	-	-	pos	-	-	-	-	Lipids and lipid-like molecules	Glycerophospholipids	466.328	0.0851821411823	74.3	0	-1.84591	174062-73-8	Glycerophosphoethanolamines	5.763	5.68	5.788	5.67	5.428	5.658	5.778	5.487	5.669	5.869	5.919	5.781	5.6	5.85	5.658	5.75	5.854	5.44	5.845	5.857	5.537	5.583	5.665
pos_1191	PC(19:0/0:0)	-	metab_639	B(i)	-	-	LMGP01050041	M+H, M+Na	C27H56NO7P	6.7698	-	-	pos	-	-	-	-	-	-	538.386	0.0385069941438	92.2	0	-1.6685	-	-	6.887	6.698	6.867	6.763	6.58	6.763	6.705	6.445	6.562	6.884	6.94	6.77	6.821	6.86	6.744	6.74	6.789	6.637	6.964	6.856	6.879	6.507	6.714
pos_1201	PC(16:0/PGF1alpha)	-	metab_650	B(ii)	-	-	HMDB0285991	M+H-H2O, M+H	C44H84NO11P	6.829	-	-	pos	-	-	-	-	Not Available	Not Available	834.591	0.0407128	0	60.3	6.18591099440995	-	Not Available	6.768	6.778	6.727	6.721	6.763	6.765	6.761	6.647	6.729	6.725	6.726	6.72	6.732	6.714	6.69	6.752	6.74	6.73	6.873	6.79	6.65	6.68	6.7
pos_1204	LysoPC(22:1(13Z)/0:0)	-	metab_653	B(ii)	map00564;map05231	Glycerophospholipid metabolism;Choline metabolism in cancer	HMDB0010399	M+H, M+Na	C30H60NO7P	6.861	甘油磷脂代谢;癌症的胆碱代谢	C04230	pos	Lipids	Phospholipids	Metabolism;Human Diseases	Lipid metabolism;Cancer: overview	Lipids and lipid-like molecules	Glycerophospholipids	578.417	0.00626277882881	0	85.1	-1.6179	-	Glycerophosphocholines	5.879	5.697	5.799	5.73	5.609	5.776	5.786	5.581	5.681	5.919	5.843	5.817	5.679	5.993	5.705	5.857	5.678	5.609	6.132	5.728	5.876	5.554	5.776
pos_1211	PC(16:0/16:0)	-	metab_661	B(ii)	map01100;map00564;map00590;map00591;map00592;map05231;map04723	Metabolic pathways;Glycerophospholipid metabolism;Arachidonic acid metabolism;Linoleic acid metabolism;alpha-Linolenic acid metabolism;Choline metabolism in cancer;Retrograde endocannabinoid signaling	PW_C000440;LMGP01010564;HMDB0000564	M+H, M+Na	C40H80NO8P	6.8981	代谢途径;甘油磷脂代谢;花生四烯酸代谢;亚油酸代谢;α-亚麻酸代谢;癌症的胆碱代谢;逆行内源性大麻素信号传导	C00157	pos	Lipids	Phospholipids	Metabolism;Metabolism;Metabolism;Metabolism;Metabolism;Human Diseases;Organismal Systems	Global and overview maps;Lipid metabolism;Lipid metabolism;Lipid metabolism;Lipid metabolism;Cancer: overview;Nervous system	Lipids and lipid-like molecules	Glycerophospholipids	734.568	0.0808102971636	0	75.1	-1.86493	63-89-8	Glycerophosphocholines	7.101	7.123	7.232	7.073	7.143	7.096	7.146	7.099	7.039	7.22	7.104	6.988	6.974	7.102	7.097	7.106	7.108	7.035	7.221	7.166	7.12	7.048	7.131
pos_1215	Diisobutyl adipate	己二酸二异丁酯	metab_665	B(i)	-	-	HMDB0041618	M+H-H2O, M+H	C14H26O4	6.829	-	C14260	pos	-	-	-	-	Lipids and lipid-like molecules	Fatty Acyls	259.19	0.00424359192015	39.2	0	-1.61192	141-04-8	Fatty acid esters	6.07	6.062	6.074	6.003	6.011	6.045	6.055	5.947	6.029	6.085	6.064	6.05	6.055	6.06	6.098	6.09	6.017	6.018	6.213	6.124	6.079	6.029	6.04
pos_1218	PE(O-18:0/0:0)	-	metab_668	B(i)	-	-	LMGP02060003	M+H, M+Na	C23H50NO6P	6.8132	-	-	pos	-	-	-	-	-	-	468.344	0.147599	42.5	0	-1.8872	-	-	5.197	5.211	5.433	5.2	4.938	5.242	5.551	4.952	5.226	5.516	5.568	5.318	5.057	5.455	5.261	5.249	5.261	4.893	5.482	5.303	4.812	5.217	5.265
pos_1219	PE(P-20:0/0:0)	-	metab_669	B(i)	-	-	LMGP02070004	M+H, M+Na	C25H52NO6P	6.9514	-	-	pos	-	-	-	-	-	-	494.36	0.164986	49.4	0	-1.32181	-	-	4.734	4.425	4.663	4.603	4.613	4.719	4.594	4.606	4.643	4.873	4.665	4.835	4.31	4.936	4.49	4.584	4.489	4.318	5.077	4.24	4.281	4.143	4.918
pos_1243	Isophorone	异佛尔酮	metab_696	B(i)	-	-	HMDB0031195	M+H-H2O, M+H	C9H14O	7.1322	-	C14743	pos	-	-	-	-	Organic oxygen compounds	Organooxygen compounds	139.112	0.0612763008269	70.9	0	-1.49329	78-59-1	Carbonyl compounds	4.608	4.55	4.578	4.566	4.533	4.544	4.561	4.544	4.603	4.617	4.564	4.56	4.541	4.57	4.624	4.621	4.556	4.582	4.762	4.625	4.533	4.535	4.585
pos_1251	O-Demethylencainide	O -去甲基桉叶素	metab_705	B(ii)	-	-	HMDB0255848	M+H, M+CH3OH+H	C21H26N2O2	7.1799	-	-	pos	-	-	-	-	Benzenoids	Benzene and substituted derivatives	339.205	0.0340015799702	0	35.9	-3.71361	-	Anilides	6.126	6.127	6.129	6.065	6.105	6.111	6.024	6.103	6.117	6.147	6.121	6.14	6.112	6.14	6.168	6.119	6.124	6.059	6.27	6.184	6.081	6.132	6.126
pos_1252	PC(22:0/0:0)	-	metab_706	B(i)	-	-	LMGP01050053	M+H-H2O, M+H	C30H62NO7P	7.1746	-	-	pos	-	-	-	-	-	-	580.433	0.0568025631009	76.9	0	-1.35666	-	-	6.151	6.109	6.19	6.166	5.994	6.161	6.114	6.138	6.018	6.209	6.102	6.083	5.988	6.202	6.022	6.091	6.028	5.919	6.277	5.955	6.094	5.951	6.096
pos_1254	N-Docosahexaenoyl Arginine	N -二十二碳六烯酰基精氨酸	metab_708	B(ii)	-	-	HMDB0242008	M+NH4, M+Na	C28H44N4O3	7.2383	-	-	pos	-	-	-	-	Not Available	Not Available	502.373	0.0613610659118	0	35.5	-4.19217	-	Not Available	6.456	6.452	6.449	6.372	6.405	6.424	6.325	6.417	6.447	6.455	6.429	6.446	6.415	6.453	6.481	6.437	6.436	6.381	6.581	6.473	6.392	6.462	6.447
pos_1263	GPCho(18:3/20:5)	-	metab_718	B(i)	map01100;map00564;map00590;map00591;map00592;map05231;map04723	Metabolic pathways;Glycerophospholipid metabolism;Arachidonic acid metabolism;Linoleic acid metabolism;alpha-Linolenic acid metabolism;Choline metabolism in cancer;Retrograde endocannabinoid signaling	HMDB0008215;HMDB0008182	M+H, 2M+3H2O+2H	C46H76NO8P	7.2595	代谢途径;甘油磷脂代谢;花生四烯酸代谢;亚油酸代谢;α-亚麻酸代谢;癌症的胆碱代谢;逆行内源性大麻素信号传导	C00157	pos	Lipids	Phospholipids	Metabolism;Metabolism;Metabolism;Metabolism;Metabolism;Human Diseases;Organismal Systems	Global and overview maps;Lipid metabolism;Lipid metabolism;Lipid metabolism;Lipid metabolism;Cancer: overview;Nervous system	Lipids and lipid-like molecules	Glycerophospholipids	802.534	0.149915	69.7	0	-5.13963	-	Glycerophosphocholines	7.006	6.984	7.009	6.972	7.115	7.01	7.268	6.941	6.831	6.921	7.034	6.868	6.88	6.786	6.818	7.02	6.838	7.035	6.97	7.005	6.982	6.899	6.928
pos_1266	PC(14:0/18:2(9Z,12Z))	-	metab_721	B(ii)	map01100;map00564;map00590;map00591;map00592;map05231;map04723	Metabolic pathways;Glycerophospholipid metabolism;Arachidonic acid metabolism;Linoleic acid metabolism;alpha-Linolenic acid metabolism;Choline metabolism in cancer;Retrograde endocannabinoid signaling	PW_C003924;LMGP01010496;HMDB0007874	M+H, M+Na	C40H76NO8P	7.2915	代谢途径;甘油磷脂代谢;花生四烯酸代谢;亚油酸代谢;α-亚麻酸代谢;癌症的胆碱代谢;逆行内源性大麻素信号传导	C00157	pos	Lipids	Phospholipids	Metabolism;Metabolism;Metabolism;Metabolism;Metabolism;Human Diseases;Organismal Systems	Global and overview maps;Lipid metabolism;Lipid metabolism;Lipid metabolism;Lipid metabolism;Cancer: overview;Nervous system	Lipids and lipid-like molecules	Glycerophospholipids	730.537	0.0305136	0	87	-1.93685	92345-33-0	Glycerophosphocholines	6.744	6.702	6.729	6.487	6.796	6.697	6.881	6.728	6.522	6.863	6.778	6.774	6.658	6.846	6.647	6.753	6.665	6.677	6.933	6.813	6.721	6.594	6.814
pos_1267	PC(18:1(11Z)/22:6(4Z,7Z,10Z,13Z,16Z,19Z))	-	metab_722	B(ii)	map01100;map00564;map00590;map00591;map00592;map05231;map04723	Metabolic pathways;Glycerophospholipid metabolism;Arachidonic acid metabolism;Linoleic acid metabolism;alpha-Linolenic acid metabolism;Choline metabolism in cancer;Retrograde endocannabinoid signaling	PW_C004139;HMDB0008090;LMGP01010847	M+H, M+Na	C48H82NO8P	7.2808	代谢途径;甘油磷脂代谢;花生四烯酸代谢;亚油酸代谢;α-亚麻酸代谢;癌症的胆碱代谢;逆行内源性大麻素信号传导	C00157	pos	Lipids	Phospholipids	Metabolism;Metabolism;Metabolism;Metabolism;Metabolism;Human Diseases;Organismal Systems	Global and overview maps;Lipid metabolism;Lipid metabolism;Lipid metabolism;Lipid metabolism;Cancer: overview;Nervous system	Lipids and lipid-like molecules	Glycerophospholipids	832.581	0.0189541937211	0	87	-5.49578	-	Glycerophosphocholines	7.679	7.556	7.562	7.581	7.717	7.642	7.794	7.548	7.515	7.485	7.559	7.607	7.638	7.464	7.493	7.616	7.505	7.564	7.607	7.471	7.547	7.476	7.506
pos_1269	PE(PGJ2/DiMe(11,5))	-	metab_724	B(ii)	-	-	HMDB0284787	M+H-H2O, M+CH3OH+H	C47H78NO11P	7.361	-	-	pos	-	-	-	-	Not Available	Not Available	846.526	0.112617	0	30.6	-2.19454	-	Not Available	6.212	6.175	6.179	5.992	6.177	6.13	6.058	6.079	6.105	6.172	6.166	6.195	6.079	6.102	6.202	6.199	6.085	6.145	6.263	6.285	6.077	6.081	6.217
pos_1281	GPCho(20:4/16:0)	-	metab_738	B(i)	map01100;map00564;map00590;map00591;map00592;map05231;map04723	Metabolic pathways;Glycerophospholipid metabolism;Arachidonic acid metabolism;Linoleic acid metabolism;alpha-Linolenic acid metabolism;Choline metabolism in cancer;Retrograde endocannabinoid signaling	HMDB0008429;HMDB0008462	M+Na, M+K	C44H80NO8P	7.4464	代谢途径;甘油磷脂代谢;花生四烯酸代谢;亚油酸代谢;α-亚麻酸代谢;癌症的胆碱代谢;逆行内源性大麻素信号传导	C00157	pos	Lipids	Phospholipids	Metabolism;Metabolism;Metabolism;Metabolism;Metabolism;Human Diseases;Organismal Systems	Global and overview maps;Lipid metabolism;Lipid metabolism;Lipid metabolism;Lipid metabolism;Cancer: overview;Nervous system	Lipids and lipid-like molecules	Glycerophospholipids	804.55	0.0722317183601	90.8	0	-2.35613	-	Glycerophosphocholines	7.806	7.779	7.896	7.797	7.781	7.834	7.829	7.797	7.763	7.835	7.769	7.733	7.724	7.82	7.705	7.714	7.688	7.727	7.881	7.735	7.826	7.724	7.726
pos_1299	1-Stearoylglycerophosphoserine	-	metab_757	B(ii)	-	-	HMDB0061698	M+H, M+Na	C24H48NO9P	7.5206	-	-	pos	-	-	-	-	Lipids and lipid-like molecules	Glycerophospholipids	526.313	0.146349	0	59.1	-2.37858	-	Glycerophosphoserines	5.786	5.735	5.89	5.825	5.694	5.791	6.046	5.711	5.844	6.07	6.062	5.991	5.723	5.972	5.859	5.822	5.944	5.632	5.954	5.976	5.611	5.906	5.794
pos_134	PC(22:6/0:0)	-	metab_803	B(i)	-	-	LMGP01050056	M+H, M+Na, M+H-H2O	C30H50NO7P	6.3707	-	-	pos	-	-	-	-	-	-	568.339	0.0320428434753	91.1	0	-1.58341	-	-	7.664	7.571	7.465	7.6	7.632	7.58	7.714	7.302	7.556	7.572	7.495	7.514	7.475	7.426	7.47	7.642	7.5	7.451	7.778	7.454	7.488	7.42	7.596
pos_1340	GPCho(20:3/20:3)	-	metab_804	B(i)	map01100;map00564;map00590;map00591;map00592;map05231;map04723	Metabolic pathways;Glycerophospholipid metabolism;Arachidonic acid metabolism;Linoleic acid metabolism;alpha-Linolenic acid metabolism;Choline metabolism in cancer;Retrograde endocannabinoid signaling	HMDB0008376;HMDB0008409;HMDB0008408;HMDB0008377	M+Na, M+K	C48H84NO8P	7.4037	代谢途径;甘油磷脂代谢;花生四烯酸代谢;亚油酸代谢;α-亚麻酸代谢;癌症的胆碱代谢;逆行内源性大麻素信号传导	C00157	pos	Lipids	Phospholipids	Metabolism;Metabolism;Metabolism;Metabolism;Metabolism;Human Diseases;Organismal Systems	Global and overview maps;Lipid metabolism;Lipid metabolism;Lipid metabolism;Lipid metabolism;Cancer: overview;Nervous system	Lipids and lipid-like molecules	Glycerophospholipids	856.579	0.0609916068269	97.7	0	-4.30954	-	Glycerophosphocholines	5.903	5.764	5.957	5.727	5.798	5.863	5.684	5.706	5.699	5.841	5.749	5.85	5.926	5.851	5.764	5.769	5.702	5.752	5.937	5.738	5.861	5.72	5.732
pos_1350	SM(d18:1/16:1(9Z))	-	metab_815	B(ii)	-	-	HMDB0240613	M+H, M+K	C39H77N2O6P	7.3877	-	-	pos	-	-	-	-	Lipids and lipid-like molecules	Sphingolipids	701.558	0.0100872352188	0	57.2	-2.0983	222403-66-9	Phosphosphingolipids	6.985	7.073	7.028	6.948	6.838	6.959	6.831	6.996	7.029	7.05	7.025	7.008	6.789	7.092	6.944	7.011	7.034	6.737	7.212	6.92	6.963	6.885	7.003
pos_1353	PE(14:0/22:0)	-	metab_818	B(ii)	map01100;map00564;map00563;map04136;map05167;map04723;map04140	Metabolic pathways;Glycerophospholipid metabolism;Glycosylphosphatidylinositol (GPI)-anchor biosynthesis;Autophagy - other;Kaposi sarcoma-associated herpesvirus infection;Retrograde endocannabinoid signaling;Autophagy - animal	PW_C004889;HMDB0008841;LMGP02011240	M+H, M+2Na-H	C41H82NO8P	7.2277	代谢途径;甘油磷脂代谢;糖基磷脂酰肌醇（GPI）-锚定生物合成;自噬-其他;卡波西肉瘤相关疱疹病毒感染;逆行内源性大麻素信号传导;自噬-动物	C00350	pos	Lipids	Phospholipids	Metabolism;Metabolism;Metabolism;Cellular Processes;Human Diseases;Organismal Systems;Cellular Processes	Global and overview maps;Lipid metabolism;Glycan biosynthesis and metabolism;Transport and catabolism;Infectious disease: viral;Nervous system;Transport and catabolism	Lipids and lipid-like molecules	Glycerophospholipids	792.55	0.0138458987654	0	38.2	1.71640842433998	-	Glycerophosphoethanolamines	6.668	6.529	6.572	6.628	6.516	6.581	6.688	6.482	6.445	6.532	6.505	6.525	6.552	6.472	6.4	6.533	6.461	6.468	6.605	6.427	6.619	6.376	6.534
pos_1357	Sebacic Acid	癸二酸	metab_822	B(i)	-	-	HMDB0000792;LMFA01170006;MJDBOTE0000540	M+H-H2O, M+H	C10H18O4	7.1375	-	C08277	pos	-	-	-	-	Lipids and lipid-like molecules	Fatty Acyls	203.128	0.0139586633409	79.9	0	-1.39036	111-20-6	Fatty acids and conjugates	6.43	6.413	6.426	6.361	6.377	6.416	6.382	6.382	6.408	6.439	6.412	6.437	6.408	6.432	6.449	6.423	6.395	6.372	6.545	6.473	6.4	6.42	6.432
pos_1359	Chenodeoxycholylarginine	鹅脱氧胆酰精氨酸	metab_824	B(ii)	-	-	HMDB0242396	M+H-H2O, M+ACN+H	C30H52N4O5	7.0737	-	-	pos	-	-	-	-	Lipids and lipid-like molecules	Steroids and steroid derivatives	590.425	0.0477068	0	45.7	-4.13655	-	Bile acids, alcohols and derivatives	7.066	7.05	7.059	6.984	7.012	7.037	7.029	6.997	7.028	7.05	7.021	7.029	7.024	7.033	7.061	7.044	7.007	6.977	7.204	7.083	7.022	7.022	7.031
pos_136	LysoPC(20:4(8Z,11Z,14Z,17Z)/0:0)	-	metab_825	B(ii)	map00564;map05231	Glycerophospholipid metabolism;Choline metabolism in cancer	HMDB0010396	M+H, M+Na, M+H-H2O	C28H50NO7P	6.3973	甘油磷脂代谢;癌症的胆碱代谢	C04230	pos	Lipids	Phospholipids	Metabolism;Human Diseases	Lipid metabolism;Cancer: overview	Lipids and lipid-like molecules	Glycerophospholipids	544.339	0.0250583624844	0	90.9	-1.88151	-	Glycerophosphocholines	7.961	7.927	8.01	7.913	7.973	7.987	7.967	7.81	7.922	7.942	7.901	7.916	7.93	7.946	7.935	7.958	7.931	7.921	8.097	7.917	7.97	7.877	7.981
pos_137	1-eicosanoyl-glycero-3-phosphate	1 -二十烷酰基-丙三基3 -磷酸	metab_836	B(ii)	-	-	LMGP10050018;HMDB0062315	M+ACN+H, M+ACN+Na, M+H-2H2O	C23H47O7P	6.4608	-	-	pos	-	-	-	-	Lipids and lipid-like molecules	Glycerophospholipids	508.338	0.0267680589752	0	55.2	-3.06179	-	Glycerophosphates	5.977	5.775	5.819	5.855	5.958	5.883	6.027	5.702	5.647	5.919	5.866	5.963	5.769	5.943	5.817	6.023	5.742	5.821	6.045	5.87	5.82	5.591	6.044
pos_1390	Lubiprostone	鲁比前列酮	metab_859	B(ii)	-	-	HMDB0015180	M+H, M+Na	C20H32F2O5	6.0276	-	C13707	pos	-	-	-	-	Lipids and lipid-like molecules	Fatty Acyls	413.211	0.0498982302926	0	71.7	0.999328348547998	136790-76-6;333963-40-9	Eicosanoids	5.761	5.71	5.863	5.65	5.712	5.781	5.844	5.707	5.731	5.812	5.758	5.706	5.748	5.745	5.773	5.796	5.706	5.71	6.262	5.896	5.769	5.714	5.712
pos_1402	Ganoderic acid Mc	灵芝酸Mc	metab_873	B(ii)	-	-	HMDB0035725	M+NH4, M+Na	C36H54O9	5.9429	-	-	pos	-	-	-	-	Lipids and lipid-like molecules	Prenol lipids	648.415	0.0192627818953	0	44.5	7.31454425210721	-	Triterpenoids	7.117	7.215	7.154	7.254	7.093	7.166	6.843	7.181	7.154	7.194	7.185	7.168	7.186	7.209	7.164	7.143	7.146	7.309	7.03	7.021	7.121	7.151	7.202
pos_1435	Benzenebutanoic acid, alpha-(acetylamino)-2-amino-gamma-oxo-	苯丁酸，α-（乙酰氨基）-2-氨基-γ-氧代-	metab_909	B(ii)	-	-	HMDB0245586	M+H-H2O, M+H	C12H14N2O4	4.7856	-	-	pos	-	-	-	-	Organic acids and derivatives	Carboxylic acids and derivatives	251.102	0.0640872930759	0	56.1	-1.57797	-	Amino acids, peptides, and analogues	6.179	6.038	6.075	6.238	6.162	6.153	6.03	6.122	6.27	6.068	6.268	6.204	5.891	6.326	6.029	6.186	6.197	6.13	6.221	6.194	6.147	6.126	5.774
pos_1444	Urea	脲酶	metab_919	B(i)	map01100;map00220;map00230;map00780;map02010;map00330;map00240	Metabolic pathways;Arginine biosynthesis;Purine metabolism;Biotin metabolism;ABC transporters;Arginine and proline metabolism;Pyrimidine metabolism	HMDB0000294;PW_C000200	M+Na, 2M+H	CH4N2O	0.6455	代谢途径;精氨酸生物合成;嘌呤代谢;生物素代谢;ABC转运器;精氨酸和脯氨酸代谢;嘧啶代谢	C00086	pos	-	-	Metabolism;Metabolism;Metabolism;Metabolism;Environmental Information Processing;Metabolism;Metabolism	Global and overview maps;Amino acid metabolism;Nucleotide metabolism;Metabolism of cofactors and vitamins;Membrane transport;Amino acid metabolism;Nucleotide metabolism	Organic acids and derivatives	Organic carbonic acids and derivatives	121.072	0.0976014544545	71	0	-1.73539	57-13-6	Ureas	4.21	4.123	4.094	4.149	4.263	4.209	4.023	4.23	4.14	4.067	4.019	4.044	4.126	4.319	4.157	4.078	4.017	4.121	4.179	3.925	4.038	4.056	3.943
pos_1447	Gamma-Glutamyl-beta-(isoxazolin-5-on-2-yl)alanine	-	metab_922	B(ii)	-	-	HMDB0040515	M+CH3OH+H, M+ACN+Na	C11H15N3O7	0.6509	-	-	pos	-	-	-	-	Organic acids and derivatives	Carboxylic acids and derivatives	365.105	0.0733679890758	0	31.8	-6.73544	142115-24-0	Amino acids, peptides, and analogues	5.19	5.181	5.227	5.112	5.12	5.185	5.23	5.031	5.034	5.186	5.175	5.341	5.158	5.219	5.232	5.043	5.271	4.891	5.276	5.075	5.047	5.079	5.036
pos_1454	Gamma-D-Glutamylglycine	-	metab_930	B(i)	-	-	-	M+H, M+Na	C7H12N2O5	0.6615	-	-	pos	-	-	-	-	-	-	205.081	0.0581197161693	36.1	0	-2.22933	-	-	4.163	4.065	3.937	4.134	3.808	4.194	4.076	3.667	4.25	3.981	4.173	4.202	4.003	3.828	4.127	4.127	4.14	4.11	4.124	3.965	4.07	3.986	4.056
pos_1460	Glutamine lactate	乳酸谷氨酰胺	metab_937	B(ii)	-	-	HMDB0252811	M+Na, M+ACN+H	C8H14N2O6	0.6667	-	-	pos	-	-	-	-	Organic acids and derivatives	Carboxylic acids and derivatives	276.119	0.0326221864063	0	45.6	-1.94946	-	Amino acids, peptides, and analogues	5.215	5.155	5.053	5.2	5.317	5.234	5.141	5.226	5.358	4.858	5.075	5.256	5.199	4.923	5.219	5.302	5.181	5.451	5.216	5.243	5.396	5.264	5.112
pos_147	1-docosanoyl-glycero-3-phosphate	1-3β-羽扇豆醇棕榈酸酯-丙三基3 -磷酸	metab_947	B(ii)	-	-	LMGP10050031;HMDB0062314;HMDB0114749	M+ACN+H, M+ACN+Na, M+H-2H2O	C25H51O7P	6.594	-	-	pos	-	-	-	-	Lipids and lipid-like molecules	Glycerophospholipids	536.37	0.0161466477658	0	54.4	-1.94391	-	Glycerophosphates	6.268	5.953	6.07	6.127	6.167	6.125	6.225	5.846	5.837	6.104	6.172	6.23	6.134	6.069	6.032	6.156	5.927	6.003	6.274	6.074	6.016	5.837	6.061
pos_1475	2-Keto-6-acetamidocaproate	2 -酮基- 6 -乙酰氨基己酸酯	metab_953	B(ii)	map01100;map00310	Metabolic pathways;Lysine degradation	HMDB0012150	M+H-2H2O, M+ACN+H	C8H13NO4	0.6827	代谢途径;赖氨酸降解	C05548	pos	-	-	Metabolism;Metabolism	Global and overview maps;Amino acid metabolism	Organic acids and derivatives	Keto acids and derivatives	229.118	0.0367999	0	38.9	-1.91632	-	Medium-chain keto acids and derivatives	5.716	5.483	5.503	5.562	5.692	5.633	5.563	5.545	5.512	5.651	5.715	5.619	5.578	5.572	5.52	5.528	5.51	5.699	5.778	5.372	5.623	5.558	5.378
pos_1481	Deoxycytidine	脱氧胞苷	metab_960	B(i)	map00240;map01100;map02010;map01232	Pyrimidine metabolism;Metabolic pathways;ABC transporters;Nucleotide metabolism	PW_C000008;HMDB0250725;HMDB0000014	M+H, 2M+H	C9H13N3O4	0.6827	嘧啶代谢;代谢途径;ABC转运器;核苷酸代谢	C00881	pos	Nucleic acids	Nucleosides	Metabolism;Metabolism;Environmental Information Processing;Metabolism	Nucleotide metabolism;Global and overview maps;Membrane transport;Global and overview maps	Nucleosides, nucleotides, and analogues	Pyrimidine nucleosides	455.188	0.0143968217586	92.3	0	-1.87582	951-77-9	Pyrimidine 2''-deoxyribonucleosides	6.633	6.668	6.717	6.645	6.675	6.68	6.64	6.707	6.582	6.77	6.864	6.504	6.759	6.776	6.525	6.674	6.613	6.479	6.732	6.506	6.499	6.447	6.655
pos_1490	Isopropylmaleic acid	异丙基马来酸	metab_970	B(ii)	map01210;map00290	2-Oxocarboxylic acid metabolism;Valine, leucine and isoleucine biosynthesis	HMDB0012241	M+H-2H2O, M+H	C7H10O4	0.688	2-氧代羧酸代谢;缬氨酸、亮氨酸和异亮氨酸生物合成	C02631	pos	-	-	Metabolism;Metabolism	Global and overview maps;Amino acid metabolism	Lipids and lipid-like molecules	Fatty Acyls	123.044	0.0226194022389	0	37.5	-0.872093	44976-69-4	Fatty acids and conjugates	4.922	4.808	4.855	4.919	4.934	4.931	4.889	4.843	4.706	4.925	5.071	4.902	4.863	4.95	4.91	4.875	4.784	4.86	5.06	4.744	4.905	4.765	4.866
pos_1498	Methylimidazoleacetic acid	甲基咪唑乙酸	metab_978	B(ii)	map01100;map00340	Metabolic pathways;Histidine metabolism	HMDB0002820;PW_C001712	M+H, M+CH3OH+H	C6H8N2O2	0.6774	代谢途径;组氨酸代谢	C05828	pos	-	-	Metabolism;Metabolism	Global and overview maps;Amino acid metabolism	Organoheterocyclic compounds	Azoles	173.092	0.0978690216011	0	38	-2.47595	2625-49-2	Imidazoles	4.602	4.618	4.764	4.547	4.59	4.661	4.674	4.603	4.875	4.551	4.664	4.661	4.66	4.803	4.624	4.88	4.625	4.558	4.8	4.688	4.768	4.322	4.615
pos_1500	Trimethylamine N-oxide	三甲胺N-氧化物	metab_982	B(i)	map01100	Metabolic pathways	HMDB0000925	M+H, 2M+H	C3H9NO	0.6562	代谢途径	C01104	pos	-	-	Metabolism	Global and overview maps	Organic nitrogen compounds	Organonitrogen compounds	151.144	0.184194	96.1	0	-1.61661	1184-78-7	Aminoxides	4.124	4.328	4.397	4.365	4.206	4.307	4.164	4.351	4.681	4.54	4.457	4.214	4.371	4.599	4.091	4.338	4.384	4.322	4.763	4.229	4.226	4.013	4.023
pos_1501	Trigonelline	葫芦巴碱	metab_983	B(i)	-	-	HMDB0000875	M+H, M+Na	C7H7NO2	0.6562	-	C01004	pos	-	-	-	-	Alkaloids and derivatives	Not Available	138.055	0.0495847453587	63.4	0	-2.23611	535-83-1	Not Available	5.101	5.016	5.062	4.993	5.139	5.086	4.937	4.98	5.039	5.14	5.051	5.168	5.066	5.215	5.082	5.07	5.068	4.908	5.282	4.843	4.985	4.894	5.015
pos_1510	P-Tolualdehyde	-	metab_993	B(i)	map01100	Metabolic pathways	HMDB0029638	M+H-H2O, M+H	C8H8O	0.757	代谢途径	C06758	pos	-	-	Metabolism	Global and overview maps	Benzenoids	Benzene and substituted derivatives	121.065	0.173562	59.5	0	-1.42789	104-87-0	Benzoyl derivatives	3.386	2.855	3.429	3.262	3.46	3.275	2.979	3.212	3.193	3.243	3.761	3.293	3.162	3.387	3.493	3.226	3.218	3.269	3.305	3.019	3.053	3.024	3.172
pos_1524	D-Citrulline	D -瓜氨酸	metab_1008	B(ii)	-	-	HMDB0250742	M+Na, M+K	C6H13N3O3	0.6297	-	-	pos	-	-	-	-	Organic acids and derivatives	Carboxylic acids and derivatives	198.085	0.0676133834011	0	80.7	-1.76705	-	Amino acids, peptides, and analogues	5.545	5.474	5.507	5.544	5.579	5.544	5.565	5.426	5.588	5.526	5.564	5.581	5.546	5.583	5.638	5.517	5.464	5.486	5.672	5.422	5.561	5.484	5.512
pos_1529	Taxiphyllin	红豆杉氰苷	metab_1013	B(ii)	-	-	HMDB0030704	M+H-H2O, M+H	C14H17NO7	0.8155	-	C01855	pos	-	-	-	-	Organic oxygen compounds	Organooxygen compounds	312.111	0.103782	0	58.1	9.16486051273818	21401-21-8	Carbohydrates and carbohydrate conjugates	5.569	5.3	5.587	5.334	5.378	5.454	5.584	5.594	5.397	5.575	5.706	5.726	5.654	5.676	5.544	5.693	5.577	5.566	5.74	5.596	5.632	5.552	5.55
pos_1530	3,4,5-Trihydroxypentanoylcarnitine	3，4，5 -三羟基戊酰肉碱	metab_1015	B(ii)	-	-	HMDB0241652	M+H-H2O, M+H	C12H23NO7	0.8155	-	-	pos	-	-	-	-	Lipids and lipid-like molecules	Fatty Acyls	294.154	0.0677307885772	0	46.1	-1.658	-	Fatty acid esters	4.993	4.929	4.999	4.864	5.181	5.005	5.485	5.167	4.76	5.509	5.244	5.357	5.155	5.281	5.533	5.311	4.968	4.942	5.294	5.369	5.254	5.199	5.309
pos_1536	L-Hypoglycin A	L -降糖氨酸	metab_1021	B(ii)	-	-	HMDB0029427	M+H, M+NH4	C7H11NO2	0.8208	-	C08287	pos	-	-	-	-	Organic acids and derivatives	Carboxylic acids and derivatives	159.112	0.200238	0	30.1	-2.20999	156-56-9	Amino acids, peptides, and analogues	4.355	4.411	4.454	4.175	4.443	4.229	4.591	4.438	4.244	4.497	4.475	4.504	4.496	4.622	4.47	4.604	4.447	4.528	4.984	4.575	4.428	4.526	4.553
pos_1537	L-Isoleucine	L-异亮氨酸	metab_1022	B(i)	map01100;map04978;map00280;map00290;map01210;map02010;map01230;map04974;map00970;map05230	Metabolic pathways;Mineral absorption;Valine, leucine and isoleucine degradation;Valine, leucine and isoleucine biosynthesis;2-Oxocarboxylic acid metabolism;ABC transporters;Biosynthesis of amino acids;Protein digestion and absorption;Aminoacyl-tRNA biosynthesis;Central carbon metabolism in cancer	HMDB0000557;PW_C000112;HMDB0000172;MJDBOTE0001077	M+H, 2M+H	C6H13NO2	0.8208	代谢途径;矿物质吸收;缬氨酸、亮氨酸和异亮氨酸降解;缬氨酸、亮氨酸和异亮氨酸生物合成;2-氧代羧酸代谢;ABC转运器;氨基酸生物合成;蛋白质的消化和吸收;氨酰基tRNA生物合成;癌症的中心碳代谢	C00407	pos	Peptides	Amino acids	Metabolism;Organismal Systems;Metabolism;Metabolism;Metabolism;Environmental Information Processing;Metabolism;Organismal Systems;Genetic Information Processing;Human Diseases	Global and overview maps;Digestive system;Amino acid metabolism;Amino acid metabolism;Global and overview maps;Membrane transport;Global and overview maps;Digestive system;Translation;Cancer: overview	Organic acids and derivatives	Carboxylic acids and derivatives	132.102	0.0373594	95.9	0	-1.77639	73-32-5;1509-34-8	Amino acids, peptides, and analogues	7.053	7.001	7.057	6.968	7.114	7.043	7.148	7.064	6.919	7.201	7.188	7.141	7.117	7.199	7.131	7.089	6.972	7.012	7.288	7.063	7.152	7.037	7.19
pos_1541	Pyrroline hydroxycarboxylic acid	吡咯啉羟基羧酸	metab_1027	B(ii)	map01100;map00330	Metabolic pathways;Arginine and proline metabolism	HMDB0001369;PW_C001057	M+H, M+NH4	C5H7NO3	0.6244	代谢途径;精氨酸和脯氨酸代谢	C04281	pos	-	-	Metabolism;Metabolism	Global and overview maps;Amino acid metabolism	Organic acids and derivatives	Carboxylic acids and derivatives	130.05	0.0334974	0	60.6	-1.66158	22573-88-2	Amino acids, peptides, and analogues	5.668	5.604	5.596	5.618	5.602	5.648	5.665	5.578	5.725	5.599	5.617	5.64	5.592	5.54	5.629	5.661	5.54	5.644	5.755	5.638	5.679	5.675	5.641
pos_156	LysoPA(0:0/18:2(9Z,12Z))	-	metab_1047	B(ii)	-	-	HMDB0007852	M+H-H2O, M+Na, M+H	C21H39O7P	7.0684	-	-	pos	-	-	-	-	Lipids and lipid-like molecules	Glycerophospholipids	417.24	0.0441084	0	76.8	-0.443766	-	Glycerophosphates	5.83	5.664	5.552	5.577	5.68	5.671	5.583	5.515	5.536	5.954	5.719	5.677	5.677	5.892	5.589	5.771	5.535	5.463	5.932	5.646	5.488	5.585	5.91
pos_157	PC(20:4(8Z,11Z,14Z,17Z)/18:1(9Z))	-	metab_1058	B(ii)	map01100;map00564;map00590;map00591;map00592;map05231;map04723	Metabolic pathways;Glycerophospholipid metabolism;Arachidonic acid metabolism;Linoleic acid metabolism;alpha-Linolenic acid metabolism;Choline metabolism in cancer;Retrograde endocannabinoid signaling	PW_C004514;HMDB0008466	2M+3H2O+2H, M+2Na-H, M+CH3OH+H	C46H82NO8P	7.0951	代谢途径;甘油磷脂代谢;花生四烯酸代谢;亚油酸代谢;α-亚麻酸代谢;癌症的胆碱代谢;逆行内源性大麻素信号传导	C00157	pos	Lipids	Phospholipids	Metabolism;Metabolism;Metabolism;Metabolism;Metabolism;Human Diseases;Organismal Systems	Global and overview maps;Lipid metabolism;Lipid metabolism;Lipid metabolism;Lipid metabolism;Cancer: overview;Nervous system	Lipids and lipid-like molecules	Glycerophospholipids	852.549	0.182388	0	87.6	0.463571009201519	-	Glycerophosphocholines	5.991	6.07	5.99	6.135	6.071	6.046	6.093	5.991	6.035	5.947	5.973	5.858	5.974	5.896	5.855	5.881	5.964	5.869	6.088	5.809	5.992	5.93	5.969
pos_1586	(2-oxo-2,3-Dihydro-1H-Indol-3-yl)acetic Acid	（2-氧代-2,3-二氢-1H-吲哚-3-基）乙酸	metab_1076	B(i)	-	-	-	M+H, M+NH4	C10H9NO3	1.9046	-	-	pos	-	-	-	-	-	-	192.065	0.0426218760324	71.4	0	-1.43718	-	-	5.735	5.635	5.745	5.756	5.604	5.7	5.523	5.677	5.821	5.706	5.823	5.699	5.567	5.899	5.683	5.714	5.7	5.661	5.721	5.741	5.643	5.711	5.417
pos_1597	Pseudoecgonine	伪爱康宁	metab_1088	B(ii)	-	-	HMDB0006348	M+NH4, M+CH3OH+H	C9H15NO3	2.0652	-	C12449	pos	-	-	-	-	Alkaloids and derivatives	Tropane alkaloids	218.138	0.128148	0	32.1	-2.03584	-	Not Available	5.779	5.7	5.647	5.652	5.763	5.724	5.706	5.702	5.667	5.792	5.764	5.862	5.837	5.837	5.899	5.821	5.943	5.748	5.947	5.951	6.048	5.814	5.865
pos_16	N-[(3s)-2-Oxotetrahydrofuran-3-Yl]butanamide	N-[（3s）-2-氧代四氢呋喃-3-基]丁酰胺	metab_1091	B(ii)	-	-	HMDB0247190	M+H, M+NH4, M+ACN+H, M+CH3OH+H	C8H13NO3	0.6774	-	-	pos	-	-	-	-	Organic acids and derivatives	Carboxylic acids and derivatives	204.123	0.0587590944684	0	41	-2.24679	-	Amino acids, peptides, and analogues	7.288	7.211	7.191	7.144	7.284	7.227	7.239	7.246	7.24	7.182	7.253	7.29	7.277	7.236	7.282	7.27	7.284	7.288	7.291	7.368	7.315	7.351	7.283
pos_160	1-arachidonoyl-2-hydroxy-sn-glycero-3-phosphate	1 -花生酰基- 2 -羟基- Sn -丙三基3 -磷酸	metab_1092	B(i)	-	-	-	M+H, M+Na, M+2Na-H	C23H39O7P	6.994	-	-	pos	-	-	-	-	-	-	459.25	0.165823	75.4	0	-1.26895	-	-	5.741	5.554	5.475	5.568	5.631	5.604	5.576	5.242	5.272	5.748	5.544	5.42	5.547	5.576	5.364	5.621	5.366	5.28	5.704	5.434	5.293	5.54	5.786
pos_1601	Asp Ile Arg	天冬氨酸 异亮氨酸 精氨酸	metab_1094	B(i)	-	-	-	M+2H, M+H	C16H30N6O6	2.0652	-	-	pos	-	-	-	-	-	-	403.229	0.137457	78	0	-1.79399	-	-	5.149	5.073	5.111	4.994	5.003	5.073	4.842	4.905	4.435	5.168	5.189	5.185	5.021	5.276	5.101	5.053	5.105	4.554	5.309	5.196	4.79	4.677	5.175
pos_1607	Methyldopa	甲基多巴	metab_1100	B(i)	-	-	HMDB0251525;HMDB0011754;MJDBOTE0001405	M+H, M+NH4	C10H13NO4	2.0705	-	C07194	pos	-	-	-	-	Phenylpropanoids and polyketides	Phenylpropanoic acids	212.091	0.0747872726721	53.6	0	-1.22347	555-30-6	Not Available	4.139	4.098	4.184	4.028	3.994	4.096	3.729	3.969	3.882	4.15	4.221	4.064	4.104	4.272	4.122	4.128	3.98	3.881	4.266	4.055	4.018	3.959	4.129
pos_1610	6-Methoxyquinoline	6-甲氧基喹啉	metab_1104	B(i)	-	-	-	M+H, M+NH4	C10H9NO	2.0705	-	-	pos	-	-	-	-	-	-	160.075	0.0573706447612	39.8	0	-1.96496	-	-	6.051	5.963	6.162	6.151	6.185	6.111	6.071	6.125	6.26	6.23	6.154	6.032	6.072	6.071	6.077	6.002	6.031	6.218	6.191	6.003	6.207	6.188	6.098
pos_1618	5-Hydroxyindoleacetic acid	5-羟基吲哚乙酸	metab_1112	B(i)	map01100;map04726;map00380	Metabolic pathways;Serotonergic synapse;Tryptophan metabolism	PW_C000609;HMDB0000763	M+H, M+NH4	C10H9NO3	2.3305	代谢途径;5-羟色胺能突触;色氨酸代谢	C05635	pos	-	-	Metabolism;Organismal Systems;Metabolism	Global and overview maps;Nervous system;Amino acid metabolism	Organoheterocyclic compounds	Indoles and derivatives	192.065	0.0400178077955	81.8	0	-1.50096	54-16-0	Indolyl carboxylic acids and derivatives	5.912	5.812	5.912	5.939	5.792	5.885	5.717	5.856	6.006	5.901	6.001	5.877	5.754	6.066	5.863	5.89	5.873	5.856	5.923	5.92	5.838	5.873	5.61
pos_167	Taurodeoxycholic acid	牛磺去氧胆酸	metab_1169	B(ii)	-	-	LMST05040013;HMDB0000896;PW_C000715	M+H-H2O, M+H, M+H-2H2O	C26H45NO6S	7.5843	-	C05463	pos	-	-	-	-	Lipids and lipid-like molecules	Steroids and steroid derivatives	464.282	0.26933	0	47.6	-1.24054	516-50-7	Bile acids, alcohols and derivatives	4.248	4.898	4.645	4.336	4.557	4.694	5.405	4.403	4.508	5.113	4.957	4.496	5.087	4.81	4.709	4.649	4.809	5.003	4.778	5.082	5.628	5.741	4.553
pos_1690	M-Xylene	-	metab_1192	B(i)	map01100	Metabolic pathways	HMDB0059810	M+H	C8H10	0.2462	代谢途径	C07208	pos	-	-	Metabolism	Global and overview maps	Benzenoids	Benzene and substituted derivatives	107.085	0.132496	53.9	0	-1.22729	108-38-3	Xylenes	3.693	3.675	3.715	3.668	3.708	3.714	3.738	3.697	3.707	3.753	3.758	3.736	3.721	3.773	3.786	3.768	3.715	3.738	3.845	3.782	3.756	3.748	3.776
pos_1714	2-Amino-2-methyl-1,3-propanediol	2-氨基-2-甲基-1,3-丙二醇	metab_1219	B(ii)	-	-	HMDB0244975	M+ACN+Na	C4H11NO2	0.5237	-	C11260	pos	-	-	-	-	Organic nitrogen compounds	Organonitrogen compounds	169.094	0.0905279263325	0	41.3	-3.26308	-	Amines	5.223	5.185	5.103	5.323	5.102	5.216	5.133	5.193	5.372	5.227	5.306	5.22	5.258	5.219	5.234	5.16	5.202	5.17	5.298	5.075	5.201	5.275	5.243
pos_172	3-Methylglutaric acid	3-甲基戊二酸	metab_1225	B(i)	-	-	HMDB0000752	M+H-H2O, M+H, M+H-2H2O	C6H10O4	6.829	-	-	pos	-	-	-	-	Lipids and lipid-like molecules	Fatty Acyls	129.054	0.0223358	43.1	0	-1.23641	626-51-7	Fatty acids and conjugates	5.491	5.472	5.489	5.407	5.404	5.459	5.449	5.339	5.428	5.496	5.483	5.467	5.471	5.448	5.497	5.497	5.447	5.425	5.615	5.524	5.481	5.44	5.45
pos_1725	N-carbamoylglycine	N -氨甲酰甘氨酸	metab_1231	B(ii)	-	-	HMDB0304424	2M+Na	C3H6N2O3	0.529	-	-	pos	-	-	-	-	Organic acids and derivatives	Carboxylic acids and derivatives	259.064	0.0208243551095	0	91.2	-5.51832	-	Amino acids, peptides, and analogues	5.055	5.032	5.043	5.18	5.01	5.048	4.994	5.029	5.248	5.152	5.218	5.135	5.164	5.077	5.112	5.021	5.098	5.036	5.233	4.966	5.102	5.164	5.08
pos_1775	Spermidine	亚精胺	metab_1286	B(i)	map01100;map00480;map00330;map02010;map04976;map00410	Metabolic pathways;Glutathione metabolism;Arginine and proline metabolism;ABC transporters;Bile secretion;beta-Alanine metabolism	PW_C000971;HMDB0001257	M+H	C7H19N3	0.5501	代谢途径;谷胱甘肽代谢;精氨酸和脯氨酸代谢;ABC转运器;胆汁分泌;β-丙氨酸代谢	C00315	pos	-	-	Metabolism;Metabolism;Metabolism;Environmental Information Processing;Organismal Systems;Metabolism	Global and overview maps;Metabolism of other amino acids;Amino acid metabolism;Membrane transport;Digestive system;Metabolism of other amino acids	Organic nitrogen compounds	Organonitrogen compounds	146.165	0.00747980767955	78.9	0	-1.79574	124-20-9	Amines	5.511	5.497	5.329	5.097	5.412	5.397	5.569	5.381	5.199	5.471	5.311	5.434	5.097	5.336	5.478	5.603	5.498	5.365	5.602	5.636	5.427	5.447	5.301
pos_1848	L-Proline	L-脯氨酸	metab_1367	B(i)	map01100;map04978;map02010;map00470;map00330;map04974;map01230;map00970;map05230	Metabolic pathways;Mineral absorption;ABC transporters;D-Amino acid metabolism;Arginine and proline metabolism;Protein digestion and absorption;Biosynthesis of amino acids;Aminoacyl-tRNA biosynthesis;Central carbon metabolism in cancer	PW_C000106;HMDB0000162;HMDB0251528;MJDBOTE0000527	M+H	C5H9NO2	0.6667	代谢途径;矿物质吸收;ABC转运器;D-氨基酸代谢;精氨酸和脯氨酸代谢;蛋白质的消化和吸收;氨基酸生物合成;氨酰基tRNA生物合成;癌症的中心碳代谢	C00148	pos	Peptides	Amino acids	Metabolism;Organismal Systems;Environmental Information Processing;Metabolism;Metabolism;Organismal Systems;Metabolism;Genetic Information Processing;Human Diseases	Global and overview maps;Digestive system;Membrane transport;Metabolism of other amino acids;Amino acid metabolism;Digestive system;Global and overview maps;Translation;Cancer: overview	Organic acids and derivatives	Carboxylic acids and derivatives	116.07	0.0114801428036	90.9	0	-1.63859	147-85-3	Amino acids, peptides, and analogues	6.089	5.968	6.044	6.039	6.064	6.06	5.962	5.958	6.003	6.172	6.173	6.073	6.028	6.185	6.088	5.974	5.953	5.926	6.232	5.867	6.024	5.933	6.11
pos_1852	Sulfonamidoethanol	磺胺乙醇	metab_1372	B(ii)	-	-	HMDB0258596	M+H	C2H7NO3S	0.6721	-	-	pos	-	-	-	-	Organic acids and derivatives	Organic sulfonic acids and derivatives	126.022	0.101102	0	30.3	-1.45155	-	Organosulfonic acids and derivatives	4.351	4.366	4.371	4.161	4.12	4.329	4.45	3.996	4.376	4.338	4.325	4.418	4.064	4.249	4.444	4.324	4.365	4.141	4.469	4.412	4.281	4.335	4.4
pos_1853	Proline betaine	-	metab_1373	B(i)	-	-	HMDB0004827	M+H	C7H13NO2	0.6721	-	C10172	pos	-	-	-	-	Organic acids and derivatives	Carboxylic acids and derivatives	144.102	0.0141924024878	53.5	0	-1.77425	471-87-4	Amino acids, peptides, and analogues	5.913	5.764	5.756	5.593	5.839	5.804	5.797	5.675	5.664	5.658	5.606	5.885	5.657	5.616	5.708	5.862	5.755	5.801	5.773	5.614	5.653	5.704	5.576
pos_1857	Stachyose	水苏糖	metab_1377	B(ii)	map01100;map00052	Metabolic pathways;Galactose metabolism	PW_C001923;HMDB0003553	M+Na	C24H42O21	0.6721	代谢途径;半乳糖代谢	C01613	pos	-	-	Metabolism;Metabolism	Global and overview maps;Carbohydrate metabolism	Organic oxygen compounds	Organooxygen compounds	689.209	0.182485	0	80.6	-2.49075	10094-58-3;470-55-3;470-55-3	Carbohydrates and carbohydrate conjugates	5.008	4.864	5.068	4.868	4.108	4.875	4.979	4.392	4.634	5.257	5.092	4.907	4.587	5.126	4.59	4.682	4.863	4.067	5.239	4.74	3.63	4.646	4.817
pos_1858	METHACHOLINE	醋甲胆碱	metab_1378	B(i)	-	-	HMDB0015654	M+H	C8H17NO2	0.6774	-	C07471	pos	-	-	-	-	Organic nitrogen compounds	Organonitrogen compounds	160.133	0.0445187979728	48.2	0	-1.88513	55-92-5	Quaternary ammonium salts	6.153	6.01	6.135	6.502	5.867	6.183	6.509	6.222	6.228	6.169	6.139	6.351	5.955	6.206	6.455	6.157	6.01	6.039	6.399	6.309	5.983	6.113	6.283
pos_1862	2(5H)-Furanone	2（5H）-呋喃酮	metab_1383	B(i)	-	-	HMDB0032330	M+H	C4H4O2	0.6827	-	C17601	pos	-	-	-	-	Organoheterocyclic compounds	Dihydrofurans	85.0283	0.0216333816382	34	0	-1.16369	497-23-4	Furanones	5.131	5.052	5.069	5.032	5.137	5.097	5.09	5.1	5.093	5.079	5.119	5.149	5.139	5.095	5.128	5.111	5.124	5.115	5.167	5.167	5.167	5.155	5.13
pos_1864	N2-Acetyl-L-ornithine	N2 -乙酰- L -鸟氨酸	metab_1385	B(i)	map01100;map01210;map00220;map01230	Metabolic pathways;2-Oxocarboxylic acid metabolism;Arginine biosynthesis;Biosynthesis of amino acids	HMDB0003357	M+H	C7H14N2O3	0.6827	代谢途径;2-氧代羧酸代谢;精氨酸生物合成;氨基酸生物合成	C00437	pos	-	-	Metabolism;Metabolism;Metabolism;Metabolism	Global and overview maps;Global and overview maps;Amino acid metabolism;Global and overview maps	Organic acids and derivatives	Carboxylic acids and derivatives	175.107	0.0666051985331	55.8	0	-1.74453	6205-08-09	Amino acids, peptides, and analogues	5.135	5.229	5.142	5.229	5.188	5.191	5.362	5.118	4.982	5.267	5.12	5.276	4.963	5.243	5.409	5.187	5.109	5.086	5.37	5.372	5.109	5.254	5.191
pos_1867	Fe(II)-nicotianamine	Fe（II）-烟酰胺	metab_1388	B(ii)	-	-	HMDB0304350	M+H-H2O	C12H21N3O6	0.6827	-	-	pos	-	-	-	-	Organic acids and derivatives	Carboxylic acids and derivatives	286.139	0.102732	0	44.6	-1.41585	-	Amino acids, peptides, and analogues	4.763	4.544	4.633	4.678	4.782	4.658	4.653	4.62	4.524	4.492	4.767	4.735	4.318	4.52	4.545	4.697	4.464	4.839	4.838	4.239	4.833	4.757	4.32
pos_1876	Xanthine	黄嘌呤	metab_1398	B(ii)	map01100;map01232;map00230;map00232	Metabolic pathways;Nucleotide metabolism;Purine metabolism;Caffeine metabolism	PW_C000198;HMDB0000292;MJDBOTE0000403	M+H	C5H4N4O2	0.6932	代谢途径;核苷酸代谢;嘌呤代谢;咖啡因代谢	C00385	pos	-	-	Metabolism;Metabolism;Metabolism;Metabolism	Global and overview maps;Global and overview maps;Nucleotide metabolism;Biosynthesis of other secondary metabolites	Organoheterocyclic compounds	Imidazopyrimidines	153.041	0.128654	0	44.3	-1.23407	69-89-6	Purines and purine derivatives	3.951	3.918	3.908	3.926	3.288	3.8	3.745	3.349	3.684	4.126	4.103	3.9	3.507	4.17	3.906	3.964	3.951	2.451	4.332	3.839	4.257	3.311	3.997
pos_1880	L-Glycine	-	metab_1403	B(i)	map01100;map00630;map00310;map01200;map00230;map01240;map00730;map02010;map00860;map04978;map01230;map00120;map00480;map04080;map04974;map00260;map00440;map00470;map05230;map00970;map04721	Metabolic pathways;Glyoxylate and dicarboxylate metabolism;Lysine degradation;Carbon metabolism;Purine metabolism;Biosynthesis of cofactors;Thiamine metabolism;ABC transporters;Porphyrin metabolism;Mineral absorption;Biosynthesis of amino acids;Primary bile acid biosynthesis;Glutathione metabolism;Neuroactive ligand-receptor interaction;Protein digestion and absorption;Glycine, serine and threoni…	-	M+H	C2H5NO2	0.7038	代谢途径;乙醛酸和二羧酸代谢;赖氨酸降解;碳代谢;嘌呤代谢;辅助因子的生物合成;硫胺素代谢;ABC转运器;卟啉代谢;矿物质吸收;氨基酸生物合成;初级胆汁酸生物合成;谷胱甘肽代谢;神经活性配体-受体相互作用;蛋白质的消化和吸收;甘氨酸、丝氨酸和苏氨酸代谢;膦酸盐和次膦酸盐代谢;D-氨基酸代谢;癌症的中心碳代谢;氨酰基tRNA生物合成;突触小泡循环	C00037	pos	Peptides;Hormones and transmitters	Amino acids;Neurotransmitters	Metabolism;Metabolism;Metabolism;Metabolism;Metabolism;Metabolism;Metabolism;Environmental Information Processing;Metabolism;Organismal Systems;Metabolism;Metabolism;Metabolism;Environmental Information Processing;Organismal Systems;Metabolism;Metabolism;Metabolism;Human Diseases;Genetic Information Processing;Organismal Systems	Global and overview maps;Carbohydrate metabolism;Amino acid metabolism;Global and overview maps;Nucleotide metabolism;Global and overview maps;Metabolism of cofactors and vitamins;Membrane transport;Metabolism of cofactors and vitamins;Digestive system;Global and overview maps;Lipid metabolism;Metabolism of other amino acids;Signaling molecules and interaction;Digestive system;Amino acid metaboli…	-	-	76.0392	0.159475	49.1	0	-0.81482	-	-	3.342	3.35	3.418	3.54	3.388	3.423	3.515	3.412	3.716	3.397	3.408	3.404	3.591	3.435	3.384	3.565	3.385	3.498	3.149	3.477	3.369	3.562	3.139
pos_1884	Thiodiacetic acid	硫代二乙酸	metab_1407	B(ii)	map00980	Metabolism of xenobiotics by cytochrome P450	HMDB0042032	M+ACN+H	C4H6O4S	0.7145	细胞色素P450异生素代谢	C14872	pos	-	-	Metabolism	Xenobiotics biodegradation and metabolism	Organic acids and derivatives	Carboxylic acids and derivatives	192.032	0.0385278693341	0	39.7	-1.83312	123-93-3	Dicarboxylic acids and derivatives	5.293	4.596	5.074	4.713	5.135	5.041	4.963	4.713	4.863	4.927	5.236	5.121	4.745	4.916	4.927	4.841	4.864	4.759	5.541	4.676	4.79	4.419	4.858
pos_1886	DL-Norvaline	DL -正缬氨酸	metab_1409	B(ii)	-	-	HMDB0013716;HMDB0251527	M+ACN+H	C5H11NO2	0.7198	-	C01799	pos	-	-	-	-	Organic acids and derivatives	Carboxylic acids and derivatives	159.113	0.281956	0	45	-1.88811	760-78-1	Amino acids, peptides, and analogues	3.918	3.9	4.106	3.865	3.967	3.757	4.104	4.008	3.534	4.109	4.075	4.026	4.121	4.276	3.857	4.102	3.871	3.999	4.571	3.969	3.97	4.031	4.145
pos_1890	Lotaustralin	百脉根苷	metab_1414	B(ii)	-	-	HMDB0033865	M+H	C11H19NO6	0.7198	-	C08334	pos	-	-	-	-	Organic oxygen compounds	Organooxygen compounds	262.128	0.151261	0	55.3	-1.40079	534-67-8	Carbohydrates and carbohydrate conjugates	4.057	3.745	4.087	3.702	3.999	3.902	4.146	4.012	3.752	4.306	4.204	4.267	4.253	4.288	4.139	4.05	3.811	3.862	4.221	3.984	4.151	4.063	4.112
pos_1899	(3R,5S)-1-pyrroline-3-hydroxy-5-carboxylic Acid	（3R，5S）-1-吡咯啉-3-羟基-5-羧酸	metab_1422	B(ii)	map01100;map00330	Metabolic pathways;Arginine and proline metabolism	HMDB0062585	M+ACN+H	C5H7NO3	0.7304	代谢途径;精氨酸和脯氨酸代谢	C04281	pos	-	-	Metabolism;Metabolism	Global and overview maps;Amino acid metabolism	Organic acids and derivatives	Carboxylic acids and derivatives	171.076	0.0474637300709	0	53.2	-1.82654	-	Amino acids, peptides, and analogues	3.448	4.809	3.411	2.723	4.114	4.057	5.195	2.869	3.257	4.587	3.028	4.764	2.987	3.119	5.01	4.517	4.367	2.978	3.361	5.146	4.107	4.562	3.672
pos_1909	N-Acetyl-L-glutamic acid	N -乙酰- L -谷氨酸	metab_1434	B(i)	map01100;map01210;map00220;map01230	Metabolic pathways;2-Oxocarboxylic acid metabolism;Arginine biosynthesis;Biosynthesis of amino acids	HMDB0001138	M+H	C7H11NO5	0.7516	代谢途径;2-氧代羧酸代谢;精氨酸生物合成;氨基酸生物合成	C00624	pos	-	-	Metabolism;Metabolism;Metabolism;Metabolism	Global and overview maps;Global and overview maps;Amino acid metabolism;Global and overview maps	Organic acids and derivatives	Carboxylic acids and derivatives	190.071	0.0317265497144	59.2	0	-1.478	1188-37-0	Amino acids, peptides, and analogues	4.42	3.812	4.438	4.412	4.559	4.242	4.013	4.175	4.519	4.396	4.656	4.495	3.988	4.654	4.155	4.232	4.094	4.061	5.078	3.953	4.441	3.785	4.422
pos_1911	Pyroglutamic Acid	焦谷氨酸	metab_1437	B(i)	map01100;map00480	Metabolic pathways;Glutathione metabolism	HMDB0000267;PW_C000182;MJDBOTE0000549	M+H	C5H7NO3	0.757	代谢途径;谷胱甘肽代谢	C01879	pos	Peptides	Amino acids	Metabolism;Metabolism	Global and overview maps;Metabolism of other amino acids	Organic acids and derivatives	Carboxylic acids and derivatives	130.05	0.0148653778281	90.3	0	-1.42521	98-79-3	Amino acids, peptides, and analogues	5.684	5.454	5.508	5.544	5.509	5.575	5.527	5.404	5.512	5.617	5.596	5.557	5.404	5.499	5.517	5.518	5.5	5.387	5.709	5.562	5.431	5.439	5.496
pos_1925	O-Acetyl-L-homoserine	O-乙酰同丝氨酸	metab_1452	B(i)	map01100;map00270	Metabolic pathways;Cysteine and methionine metabolism	HMDB0029423	M+H	C6H11NO4	0.7677	代谢途径;半胱氨酸和蛋氨酸代谢	C01077	pos	-	-	Metabolism;Metabolism	Global and overview maps;Amino acid metabolism	Organic acids and derivatives	Carboxylic acids and derivatives	162.076	0.202017	54.4	0	-1.70485	7540-67-2	Amino acids, peptides, and analogues	3.868	3.763	3.914	3.758	4.015	3.754	3.77	3.7	4.026	3.795	3.767	3.904	3.749	3.758	3.841	3.853	3.915	3.843	3.936	3.915	3.72	3.637	3.763
pos_1933	Oxypurinol	羟嘌呤醇	metab_1461	B(i)	-	-	HMDB0000786	M+H	C5H4N4O2	0.8048	-	C07599	pos	-	-	-	-	Organoheterocyclic compounds	Imidazopyrimidines	153.04	0.0753557164017	72.2	0	-1.81202	2465-59-0	Purines and purine derivatives	4.288	4.217	4.263	4.175	3.842	4.19	4.16	4.007	4.15	4.492	4.503	4.367	3.921	4.591	4.294	4.328	4.317	3.585	4.678	4.218	4.59	4.052	4.379
pos_1934	N1-Methyl-2-pyridone-5-carboxamide	N1 -甲基- 2 -吡啶酮- 5 -甲酰胺	metab_1462	B(ii)	map01100;map00760	Metabolic pathways;Nicotinate and nicotinamide metabolism	HMDB0004193;PW_C002086	M+H	C7H8N2O2	0.8101	代谢途径;烟酸和烟酰胺代谢	C05842	pos	-	-	Metabolism;Metabolism	Global and overview maps;Metabolism of cofactors and vitamins	Organoheterocyclic compounds	Pyridines and derivatives	153.066	0.0211739495486	0	54.4	-1.62503	701-44-0	Pyridinecarboxylic acids and derivatives	5.799	5.837	5.794	5.932	5.918	5.854	6.006	5.812	5.081	5.744	4.795	4.75	5.628	5.843	5.943	5.073	5.66	5.763	5.789	5.793	5.764	5.586	4.715
pos_1935	Indole-3-acetaldehyde	吲哚-3-乙醛	metab_1463	B(i)	map01100;map00380	Metabolic pathways;Tryptophan metabolism	HMDB0001190	M+NH4	C10H9NO	0.8101	代谢途径;色氨酸代谢	C00637	pos	-	-	Metabolism;Metabolism	Global and overview maps;Amino acid metabolism	Organoheterocyclic compounds	Indoles and derivatives	177.102	0.209348	67.2	0	-2.08263	2591-98-2	Indoles	3.691	3.627	3.912	3.935	4.135	3.872	3.828	4.027	4.107	4.171	4.016	3.725	3.672	3.864	3.969	3.498	3.829	4.149	4.08	3.544	3.831	3.94	3.991
pos_1938	Propionylcarnitine	丙酰肉碱	metab_1466	B(i)	-	-	LMFA07070105;PW_C000658;HMDB0000824	M+H	C10H19NO4	0.8155	-	C03017	pos	-	-	-	-	Lipids and lipid-like molecules	Fatty Acyls	218.138	0.0189734935312	64.5	0	-1.58567	17298-37-2;20064-19-1	Fatty acid esters	5.494	5.332	5.299	5.237	5.425	5.367	5.378	5.433	5.371	5.495	5.451	5.516	5.456	5.498	5.535	5.469	5.635	5.381	5.57	5.608	5.674	5.434	5.509
pos_194	Ganolucidic acid A	甘草次酸A	metab_1468	B(ii)	-	-	HMDB0035302	M+NH4, M+Na, M+H	C30H44O6	5.874	-	-	pos	-	-	-	-	Lipids and lipid-like molecules	Prenol lipids	518.353	0.0434575787038	0	56.1	9.89118578819966	98665-21-5	Triterpenoids	6.214	6.326	6.268	6.4	6.229	6.282	5.968	6.301	6.277	6.311	6.315	6.313	6.272	6.343	6.287	6.262	6.29	6.446	2.966	6.098	6.231	6.3	6.328
pos_1953	LL-2,6-Diaminopimelic Acid	Ll - 2，6 -二氨基庚二酸	metab_1483	B(i)	map01100;map00470;map01230	Metabolic pathways;D-Amino acid metabolism;Biosynthesis of amino acids	HMDB0001370	M+H-2H2O	C7H14N2O4	0.9168	代谢途径;D-氨基酸代谢;氨基酸生物合成	C00666	pos	-	-	Metabolism;Metabolism;Metabolism	Global and overview maps;Metabolism of other amino acids;Global and overview maps	Organic acids and derivatives	Carboxylic acids and derivatives	155.081	0.107231	67.6	0	-1.15893	583-93-7	Amino acids, peptides, and analogues	4.61	5.92	4.171	4.15	5.332	5.161	6.265	4.352	4.175	5.835	4.405	5.878	4.456	4.897	6.189	5.63	5.502	4.099	4.864	6.258	5.322	5.617	5.235
pos_1958	Desacetyl-nitazoxanide	去乙酰-硝唑克酰胺	metab_1488	B(ii)	-	-	HMDB0060597	M+ACN+Na	C10H7N3O4S	0.9329	-	-	pos	-	-	-	-	Benzenoids	Benzene and substituted derivatives	329.034	0.176597	0	34.7	9.877967450213712	-	Benzoic acids and derivatives	4.404	3.957	4.332	4.363	4.506	4.394	4.263	4.186	4.276	4.4	4.461	4.436	4.126	4.522	4.332	4.396	4.137	4.342	4.786	4.545	4.649	4.152	4.185
pos_1967	Pseudouridine	假尿苷	metab_1498	B(i)	map00240;map01100	Pyrimidine metabolism;Metabolic pathways	HMDB0000767	M+H	C9H12N2O6	1.0607	嘧啶代谢;代谢途径	C02067	pos	-	-	Metabolism;Metabolism	Nucleotide metabolism;Global and overview maps	Nucleosides, nucleotides, and analogues	Nucleoside and nucleotide analogues	245.076	0.161721	65.5	0	-1.29325	1445-07-4	Not Available	3.736	3.759	3.744	3.779	3.626	3.764	3.734	3.73	3.917	3.818	3.806	3.785	3.678	3.831	3.849	3.773	3.832	3.839	3.932	3.746	3.822	3.732	3.648
pos_1983	D-Octopine	D -章鱼碱	metab_1516	B(i)	map01100;map02010;map00330	Metabolic pathways;ABC transporters;Arginine and proline metabolism	-	M+H	C9H18N4O4	1.1513	代谢途径;ABC转运器;精氨酸和脯氨酸代谢	C04137	pos	-	-	Metabolism;Environmental Information Processing;Metabolism	Global and overview maps;Membrane transport;Amino acid metabolism	-	-	247.139	0.186826	42.1	0	-2.51669	34522-32-2	-	4.049	3.737	3.821	3.818	4.028	3.986	3.375	3.626	3.895	4.1	4.289	4.234	3.692	4.182	3.953	4.081	3.839	3.734	4.322	4.099	4.111	3.664	4.167
pos_1989	Niacinamide	烟酰胺	metab_1522	B(i)	map01100;map00760;map04977;map01240	Metabolic pathways;Nicotinate and nicotinamide metabolism;Vitamin digestion and absorption;Biosynthesis of cofactors	PW_C001086;HMDB0001406	M+H	C6H6N2O	1.1991	代谢途径;烟酸和烟酰胺代谢;维生素的消化和吸收;辅助因子的生物合成	C00153	pos	Vitamins and cofactors	Vitamins	Metabolism;Metabolism;Organismal Systems;Metabolism	Global and overview maps;Metabolism of cofactors and vitamins;Digestive system;Global and overview maps	Organoheterocyclic compounds	Pyridines and derivatives	123.055	0.0149363036913	81.7	0	-1.17522	98-92-0	Pyridinecarboxylic acids and derivatives	4.818	4.764	4.944	4.783	4.701	4.814	4.852	4.805	4.885	4.99	4.886	4.857	4.988	4.944	4.911	4.716	4.731	4.59	5.066	4.794	4.638	4.756	4.849
pos_1993	5-Methylcytidine	5 -甲基胞苷	metab_1527	B(i)	-	-	HMDB0000982;HMDB0257731	M+H	C10H15N3O5	1.2416	-	-	pos	-	-	-	-	Nucleosides, nucleotides, and analogues	Pyrimidine nucleosides	258.108	0.159317	86.6	0	-1.55085	2140-61-6	Not Available	4.893	4.744	4.9	4.838	4.858	4.88	4.806	4.924	4.852	4.832	5.011	4.89	4.973	4.975	4.894	4.962	4.961	4.911	5.093	4.926	4.913	4.994	4.857
pos_201	3-Oxo-alpha-ionol	3 -氧代- α -紫罗兰醇	metab_1547	B(ii)	-	-	HMDB0303805	M+H-H2O, M+H, M+H-2H2O	C13H20O2	5.6762	-	-	pos	-	-	-	-	Lipids and lipid-like molecules	Prenol lipids	209.153	0.0722430166805	0	56.1	-1.45663	-	Sesquiterpenoids	4.86	4.618	5.037	4.676	4.796	4.853	4.94	4.995	4.872	4.724	4.933	4.808	4.936	5.107	4.59	4.926	4.529	4.902	4.866	4.745	4.663	4.763	4.519
pos_2011	N-hydroxyl-tryptamine	N -羟色胺	metab_1549	B(ii)	map01100;map00380	Metabolic pathways;Tryptophan metabolism	HMDB0255154	M+H	C10H12N2O	1.5671	代谢途径;色氨酸代谢	C17203	pos	-	-	Metabolism;Metabolism	Global and overview maps;Amino acid metabolism	Organoheterocyclic compounds	Indoles and derivatives	177.102	0.0960785	0	55.7	-1.57586	-	Indoles	4.487	4.376	4.511	4.529	4.565	4.546	4.462	4.484	4.607	4.605	4.503	4.451	4.476	4.489	4.513	4.442	4.486	4.619	4.639	4.469	4.603	4.565	4.492
pos_2018	Diaminopimelic acid	-	metab_1556	B(ii)	map01100;map00470;map01230	Metabolic pathways;D-Amino acid metabolism;Biosynthesis of amino acids	HMDB0001370;HMDB0242532	M+H-2H2O	C7H14N2O4	1.7916	代谢途径;D-氨基酸代谢;氨基酸生物合成	C00666	pos	-	-	Metabolism;Metabolism;Metabolism	Global and overview maps;Metabolism of other amino acids;Global and overview maps	Organic acids and derivatives	Carboxylic acids and derivatives	155.081	0.0924170889842	0	34	-1.18366	583-93-7	Amino acids, peptides, and analogues	4.048	5.42	3.468	3.182	4.812	4.619	5.767	3.788	3.504	5.331	3.808	5.361	3.993	4.336	5.683	5.108	4.985	3.544	4.342	5.769	4.8	5.115	4.686
pos_2024	1-Pentanol	1-戊醇	metab_1563	B(i)	-	-	HMDB0013036	M+H-H2O	C5H12O	1.9262	-	C16834	pos	-	-	-	-	Organic oxygen compounds	Organooxygen compounds	71.0855	0.102061	42.3	0	-0.410284	71-41-0	Alcohols and polyols	3.122	3.099	3.115	3.111	3.049	3.13	3.08	3.061	3.088	3.088	3.063	3.183	3.141	3.186	3.127	3.099	3.13	3.071	3.147	3.103	3.075	3.107	3.121
pos_203	Hesperetin 7-glucoside	橙皮素7 -葡萄糖苷	metab_1569	B(ii)	-	-	HMDB0030747	M+NH4, M+Na, M+H	C22H24O11	5.9376	-	-	pos	-	-	-	-	Lipids and lipid-like molecules	Prenol lipids	482.165	0.0262017974802	0	65.5	-1.86593	2500-68-7	Sesquiterpenoids	5.685	4.924	5.395	5.018	5.129	5.315	5.569	5.172	5.12	5.749	5.859	5.524	5.576	5.337	5.625	5.844	5.389	5.167	5.584	5.539	5.171	5.586	5.033
pos_2036	P-Coumaric acid sulfate	-	metab_1576	B(ii)	-	-	HMDB0125166	M+NH4	C9H8O6S	2.0493	-	-	pos	-	-	-	-	Phenylpropanoids and polyketides	Cinnamic acids and derivatives	262.038	0.103398	0	30.8	-1.76491	151481-49-1	Cinnamic acids	4.1	3.952	3.997	4.062	4.108	4.049	4.016	4.071	4.131	4.119	4.072	4.122	4.055	4.107	4.11	4.076	4.063	4.121	4.401	4.085	4.19	4.11	4.036
pos_204	(S)-2-Acetamido-3-(4-chlorophenyl)propanoic acid	（S） -2-乙酰氨基-3-（4-氯苯基）丙酸	metab_1580	B(ii)	-	-	HMDB0243712	M+H, M+Na, M+H-H2O	C11H12ClNO3	5.9376	-	-	pos	-	-	-	-	Organic acids and derivatives	Carboxylic acids and derivatives	242.057	0.0182158663243	0	35.4	-1.49356	-	Amino acids, peptides, and analogues	5.161	5.21	5.101	5.022	5.115	5.1	5.313	5.129	5.099	5.149	5.048	5.166	5.064	5.099	5.259	5.156	5.168	5.028	5.352	5.372	5.131	5.163	5.1
pos_2048	Racemethionine	消旋蛋氨酸	metab_1589	B(ii)	-	-	HMDB0033951	M+ACN+H	C5H11NO2S	2.0705	-	C01733	pos	-	-	-	-	Organic acids and derivatives	Carboxylic acids and derivatives	191.085	0.254678	0	51.5	-0.0871303	59-51-8	Amino acids, peptides, and analogues	3.949	4.012	4.097	3.804	3.864	3.888	4.022	3.992	3.779	4.036	4.063	4.12	4.098	4.2	4.027	4.172	4.148	4.142	4.598	4.153	3.984	4.098	4.193
pos_2055	G-Glu-Val	G-谷氨酰-缬氨酸	metab_1597	B(i)	-	-	HMDB0011172	M+H	C10H18N2O5	2.0812	-	-	pos	-	-	-	-	Organic acids and derivatives	Carboxylic acids and derivatives	247.128	0.0278959497212	54.7	0	-1.46574	2746-34-1	Amino acids, peptides, and analogues	4.664	4.424	4.512	4.5	4.676	4.563	4.526	4.455	4.286	4.629	4.676	4.659	4.547	4.62	4.569	4.554	4.449	4.509	4.861	4.492	4.577	4.413	4.631
pos_2059	Tyramine	酪胺	metab_1601	B(i)	map01100;map04080;map04974;map00350;map01240	Metabolic pathways;Neuroactive ligand-receptor interaction;Protein digestion and absorption;Tyrosine metabolism;Biosynthesis of cofactors	HMDB0000306;PW_C000210;MJDBOTE0000392	M+H-H2O	C8H11NO	2.134	代谢途径;神经活性配体-受体相互作用;蛋白质的消化和吸收;酪氨酸代谢;辅助因子的生物合成	C00483	pos	Peptides	Amines	Metabolism;Environmental Information Processing;Organismal Systems;Metabolism;Metabolism	Global and overview maps;Signaling molecules and interaction;Digestive system;Amino acid metabolism;Global and overview maps	Benzenoids	Benzene and substituted derivatives	120.081	0.0272567860074	66.2	0	-1.40988	51-67-2	Phenethylamines	6.602	6.558	6.605	6.61	6.659	6.611	6.686	6.645	6.545	6.686	6.748	6.692	6.707	6.758	6.667	6.591	6.572	6.595	6.852	6.591	6.722	6.585	6.677
pos_2061	L-Pipecolic acid	L-哌啶甲酸	metab_1604	B(i)	map01100;map00310	Metabolic pathways;Lysine degradation	HMDB0000716;HMDB0000070;PW_C000567	M+H	C6H11NO2	2.1707	代谢途径;赖氨酸降解	C00408	pos	-	-	Metabolism;Metabolism	Global and overview maps;Amino acid metabolism	Organic acids and derivatives	Carboxylic acids and derivatives	130.086	0.0977884764376	62.3	0	-1.45308	3105-95-1;535-75-1	Amino acids, peptides, and analogues	4.052	4.759	4.319	4.049	4.357	4.318	5.219	4.049	4.129	4.719	4.128	4.813	4.16	4.228	5.018	4.589	4.427	4.112	4.318	5.194	4.441	4.588	4.406
pos_2074	Leu Asp	亮氨酸 天冬氨酸	metab_1618	B(i)	-	-	-	M+H	C10H18N2O5	2.8144	-	-	pos	-	-	-	-	-	-	247.129	0.0239140581288	47.3	0	-1.34518	-	-	4.95	4.778	4.912	4.815	4.847	4.875	4.811	4.718	4.552	4.91	5.022	4.943	4.707	5.01	4.943	4.821	4.883	4.629	5.284	4.897	4.756	4.661	5.023
pos_208	PE-NMe(18:3(9Z,12Z,15Z)/22:5(4Z,7Z,10Z,13Z,16Z))	-	metab_1624	B(ii)	-	-	HMDB0113245;PW_C059369	M+H+Na, M+Na, M+2Na	C46H76NO8P	5.9535	-	C01241	pos	-	-	-	-	Lipids and lipid-like molecules	Glycerophospholipids	824.519	0.0346309583187	0	36.8	-0.738682	-	Glycerophosphoethanolamines	5.994	6.082	6.047	6.15	5.986	6.047	5.665	6.053	6.072	6.047	6.06	5.998	6.044	6.063	6.046	6.001	6.049	6.218	3.293	5.837	5.99	6.031	6.106
pos_2081	5-Aminovaleric Acid	5-氨基戊酸	metab_1626	B(i)	map01100;map00310;map00470;map00330	Metabolic pathways;Lysine degradation;D-Amino acid metabolism;Arginine and proline metabolism	HMDB0003355	M+H-H2O	C5H11NO2	3.0017	代谢途径;赖氨酸降解;D-氨基酸代谢;精氨酸和脯氨酸代谢	C00431	pos	-	-	Metabolism;Metabolism;Metabolism;Metabolism	Global and overview maps;Amino acid metabolism;Metabolism of other amino acids;Amino acid metabolism	Organic acids and derivatives	Carboxylic acids and derivatives	100.076	0.0542275530802	31	0	-1.22435	660-88-8	Amino acids, peptides, and analogues	5.991	5.89	6.637	5.947	5.984	6.241	5.935	5.918	5.932	5.599	5.89	5.907	5.975	5.984	6.002	5.991	5.924	5.948	6.032	5.913	5.776	5.851	5.929
pos_2089	(4E)-3-Hydroxyhex-4-enoylcarnitine	（4E）-3-羟基十六烷基-4-烯酰基肉碱	metab_1634	B(ii)	-	-	HMDB0241670	M+H-2H2O	C13H23NO5	3.1248	-	-	pos	-	-	-	-	Lipids and lipid-like molecules	Fatty Acyls	238.143	0.232842	0	32	-1.06649	-	Fatty acid esters	4.472	4.47	4.51	4.474	4.528	4.519	4.537	4.505	4.536	4.582	4.577	4.576	4.588	4.609	4.628	4.626	4.63	4.591	4.76	4.66	4.64	4.635	4.657
pos_2097	Genipin	京尼平	metab_1643	B(ii)	-	-	HMDB0035830;MJDBOTE0001654	M+NH4	C11H14O5	3.1996	-	C09780	pos	-	-	-	-	Lipids and lipid-like molecules	Prenol lipids	244.117	0.0809664457615	0	40.9	-2.711	6902-77-8	Monoterpenoids	3.761	4.747	4.032	3.318	4.217	4.339	4.496	3.92	3.885	4.624	3.811	4.524	4.323	4.03	4.381	4.553	4.32	4.096	4.017	4.702	4.355	4.465	3.726
pos_2101	Prenalterol	对羟苯心安	metab_1649	B(ii)	-	-	HMDB0256762;HMDB0243809	M+H-H2O	C12H19NO3	3.2102	-	C07533	pos	-	-	-	-	Benzenoids	Phenols	208.133	0.0862826699652	0	65.7	-1.2423	57526-81-5	4-alkoxyphenols	4.841	4.807	4.86	4.812	4.863	4.856	4.858	4.83	4.866	4.873	4.83	4.875	4.851	4.853	4.874	4.867	4.844	4.843	5	4.888	4.863	4.852	4.883
pos_2111	Phendimetrazine	苯甲曲秦	metab_1660	B(ii)	-	-	HMDB0015519	M+H	C12H17NO	3.2421	-	C07904	pos	-	-	-	-	Organoheterocyclic compounds	Oxazinanes	192.138	0.0067964851996	0	50.3	-1.34876	634-03-7	Morpholines	5.011	5.009	5.021	4.984	5.014	5.011	5.022	4.988	5.003	5.025	4.996	5.003	5	5	5.011	5.007	4.997	4.971	5.12	5.019	5.003	4.986	5.017
pos_2122	3,7,8,15-Scirpenetetrol	3，7，8，15 -三萜醇	metab_1672	B(ii)	-	-	HMDB0037560	M+NH4	C15H22O6	3.2955	-	-	pos	-	-	-	-	Lipids and lipid-like molecules	Prenol lipids	316.175	0.123253	0	46.6	-1.48273	128534-67-8	Sesquiterpenoids	4.195	4.221	4.202	3.989	4.308	4.27	4.195	4.222	4.374	4.248	4.353	4.399	4.194	4.732	4.744	4.352	4.343	4.004	4.512	4.502	4.379	4.22	4.344
pos_2125	Asp Ile	-	metab_1675	B(i)	-	-	-	M+H	C10H18N2O5	3.3009	-	-	pos	-	-	-	-	-	-	247.129	0.0417038246397	74.9	0	-1.35085	-	-	5.194	5.185	5.281	5.161	4.888	5.144	5.08	4.928	4.825	5.209	5.388	5.206	4.805	5.377	5.282	5.107	5.286	4.433	5.648	5.332	4.812	4.969	5.386
pos_2129	Swainsonine	苦马豆素	metab_1679	B(i)	-	-	-	M+H	C8H15NO3	3.3062	-	C10173	pos	-	-	-	-	-	-	174.112	0.0608866	73.5	0	-1.40989	72741-87-8	-	3.893	3.827	4.311	4.004	4.135	4.06	4.335	3.969	4.184	3.828	4.253	4.362	4.331	4.582	4.106	4.015	3.817	3.983	4.327	4.126	3.849	4.079	3.921
pos_2130	1,3-dimethyl-5-[(propan-2-ylamino)methyl]benzimidazol-2-one	1,3-二甲基-5-[（丙-2-基氨基）甲基]苯并咪唑-2-酮	metab_1681	B(i)	-	-	-	M+H	C13H19N3O	3.3062	-	-	pos	-	-	-	-	-	-	234.159	0.0768295066445	36	0	-4.61349	-	-	3.735	3.617	3.623	3.538	4.091	3.826	3.977	3.817	3.401	3.892	3.81	3.897	3.926	3.805	3.754	4.027	3.979	3.993	4.39	4.093	4.63	3.81	4.116
pos_2131	Lupinic acid	羽扇豆酸	metab_1682	B(ii)	-	-	HMDB0302524	M+H-H2O	C10H17NO2	3.3115	-	C01513	pos	-	-	-	-	Alkaloids and derivatives	Lupin alkaloids	166.122	0.0263541487785	0	51.7	-1.20895	67392-79-4	Lupinine-type alkaloids	4.257	4.146	3.864	4.008	3.903	4.044	4.111	4.378	4.077	3.833	3.931	4.157	4.322	4.099	4.26	4.09	4.147	4.171	2.046	3.997	3.915	3.951	4.022
pos_2139	2-(N-(7-Nitrobenz-2-oxa-1,3-diazol-4-yl)amino)-2-deoxyglucose	2-（N-（7-硝基苯-2-氧杂-1,3-二唑-4-基）氨基）-2-脱氧葡萄糖	metab_1690	B(ii)	-	-	HMDB0243583	M+ACN+H	C12H14N4O8	3.3435	-	-	pos	-	-	-	-	Organoheterocyclic compounds	Benzoxadiazoles	384.114	0.0756523740848	0	43.6	-1.5256	-	Not Available	4.484	4.216	4.474	4.418	4.454	4.434	4.36	4.303	4.466	4.428	4.523	4.509	4.284	4.493	4.414	4.369	4.329	4.27	4.754	4.31	4.492	4.222	4.328
pos_2142	Gamma-Glutamyltyrosine	γ -谷氨酰酪氨酸	metab_1694	B(i)	-	-	HMDB0011741	M+H	C14H18N2O6	3.3594	-	-	pos	-	-	-	-	Organic acids and derivatives	Carboxylic acids and derivatives	311.123	0.0363230166341	90.2	0	-1.45228	7432-23-7	Amino acids, peptides, and analogues	4.999	4.698	4.837	4.853	4.947	4.868	4.766	4.808	4.738	4.851	5.042	4.915	4.77	4.892	4.875	4.903	4.788	4.922	5.076	4.689	4.857	4.773	4.78
pos_2144	Gly Asp Leu	甘氨酸 天冬氨酸 亮氨酸	metab_1696	B(i)	-	-	-	M+H	C12H21N3O6	3.3647	-	-	pos	-	-	-	-	-	-	304.15	0.00981836890024	53.9	0	-1.48852	-	-	4.369	4.388	4.639	4.419	4.091	4.437	4.297	4.149	4.028	4.427	4.69	4.632	4.037	4.722	4.318	4.281	4.419	3.496	4.883	4.317	3.989	3.87	4.666
pos_2145	5-Methyltetrahydrofolic acid	5－甲基四氢叶酸	metab_1697	B(ii)	map01100;map01523;map01200;map00670	Metabolic pathways;Antifolate resistance;Carbon metabolism;One carbon pool by folate	HMDB0001396;PW_C001079	M+H	C20H25N7O6	3.3701	代谢途径;抗叶酸制剂耐药性;碳代谢;叶酸的一个碳库	C00440	pos	-	-	Metabolism;Human Diseases;Metabolism;Metabolism	Global and overview maps;Drug resistance: antineoplastic;Global and overview maps;Metabolism of cofactors and vitamins	Organoheterocyclic compounds	Pteridines and derivatives	460.193	0.116015	0	74.7	-1.7388	134-35-0	Pterins and derivatives	4.604	4.121	4.682	4.639	4.698	4.615	3.273	4.661	4.649	4.356	4.627	4.012	4.636	4.671	3.088	4.087	4.348	4.652	4.711	2.617	4.563	4.433	4.537
pos_2147	Imidazolone A	咪唑啉酮A	metab_1699	B(ii)	-	-	HMDB0253421	M+ACN+H	C12H22N4O6	3.3755	-	-	pos	-	-	-	-	Organic acids and derivatives	Carboxylic acids and derivatives	360.19	0.196112	0	36.9	6.5111062395444295	-	Amino acids, peptides, and analogues	4.529	4.524	4.55	4.474	4.551	4.562	4.581	4.559	4.595	4.614	4.611	4.568	4.576	4.628	4.671	4.704	4.69	4.695	4.792	4.729	4.674	4.672	4.641
pos_2161	Terbutaline	间羟舒喘宁	metab_1715	B(ii)	-	-	HMDB0015009	M+NH4	C12H19NO3	3.4181	-	C07129	pos	-	-	-	-	Benzenoids	Phenols	243.17	0.0265811390012	0	32.7	-1.97684	23031-25-6	Benzenediols	4.508	4.518	4.506	4.511	4.549	4.524	4.494	4.481	4.534	4.547	4.482	4.476	4.481	4.485	4.472	4.494	4.459	4.42	4.557	4.51	4.499	4.511	4.5
pos_2174	6-[3-(2-carboxyethyl)-5-hydroxyphenoxy]-3,4,5-trihydroxyoxane-2-carboxylic acid	6-[3-（2-羧乙基）-5-羟基苯氧基]-3,4,5-三羟基氧烷-2-羧酸	metab_1728	B(ii)	-	-	HMDB0128026	M+NH4	C15H18O10	3.4608	-	-	pos	-	-	-	-	Not Available	Not Available	376.123	0.168466	0	33.3	-1.68444	-	Not Available	4.251	4.155	4.461	4.363	4.139	4.272	4.176	4.198	4.361	4.243	4.35	4.292	4.165	4.462	4.395	4.363	4.248	4.205	4.779	4.157	4.438	4.073	4.428
pos_2176	Fenvalerate	氯戊菊酯	metab_1730	B(ii)	-	-	HMDB0031791	M+H-2H2O	C25H22ClNO3	3.4767	-	C10988	pos	-	-	-	-	Lipids and lipid-like molecules	Fatty Acyls	384.114	0.183029	0	42.6	-1.47141	51630-58-1	Fatty acid esters	4.408	4.004	4.215	4.221	4.253	4.298	4.173	4.151	4.299	4.279	4.259	4.338	4.04	4.264	4.272	4.22	4.097	4.042	4.65	4.088	4.453	4.125	4.177
pos_2177	N-(3-acetamidopropyl)pyrrolidin-2-one	N-（3-乙酰氨基丙基）吡咯烷-2-酮	metab_1731	B(ii)	-	-	HMDB0061384	M+H	C9H16N2O2	3.4926	-	-	pos	-	-	-	-	Organoheterocyclic compounds	Pyrrolidines	185.128	0.0135931969632	0	39.8	-1.22799	106692-36-8	N-alkylpyrrolidines	5.331	5.485	5.423	5.531	5.389	5.435	5.536	5.505	5.33	5.221	4.863	4.903	5.392	5.42	5.425	5.229	5.369	5.445	5.374	5.364	5.354	5.325	4.966
pos_2181	6-Hydroxyoct-2-enedioylcarnitine	6 -羟基辛基- 2 -乙内酰基肉碱	metab_1736	B(ii)	-	-	HMDB0241712	M+H-2H2O	C15H25NO7	3.5138	-	-	pos	-	-	-	-	Lipids and lipid-like molecules	Fatty Acyls	296.149	0.141264	0	31.5	-1.49576	-	Fatty acid esters	4.025	3.756	3.544	3.09	4.209	4.01	4.264	4.216	3.018	2.917	2.915	4.337	3.571	3.937	4.898	4.254	4.147	4.424	3.037	4.576	3.714	4.492	4.069
pos_2184	2-(Difluoromethyl)arginine	2-（二氟甲基）精氨酸	metab_1739	B(ii)	-	-	HMDB0247212	M+H-H2O	C7H14F2N4O2	3.5245	-	-	pos	-	-	-	-	Organic acids and derivatives	Carboxylic acids and derivatives	207.103	0.114635	0	57.3	-9.75205	-	Amino acids, peptides, and analogues	4.287	3.928	4.185	4.076	4.314	4.159	4.198	4.135	4.237	4.343	4.456	4.33	4.398	4.487	4.269	4.155	4.401	4.442	4.387	4.22	4.291	4.157	4.31
pos_2187	N-[(3a,5b,7a)-3-hydroxy-24-oxo-7-(sulfooxy)cholan-24-yl]-Glycine	N-[（3a，5b，7a）-3-羟基-24-氧代-7-（磺酰氧基）胆聚糖-24-基]-甘氨酸	metab_1741	B(ii)	-	-	HMDB0002496	M+ACN+H	C26H43NO8S	3.5351	-	C01324	pos	-	-	-	-	Homogeneous non-metal compounds	Homogeneous halogens	571.308	0.0491002851447	0	36.4	5.60023411892184	67030-55-1	Not Available	4.603	4.551	4.631	4.922	5.04	4.686	4.536	4.98	4.488	4.577	4.923	4.571	4.91	4.7	4.975	4.817	4.962	4.348	4.788	4.967	4.756	4.633	4.77
pos_2193	Policapram	聚乙酰胺	metab_1748	B(ii)	-	-	HMDB0256664	2M+ACN+H	C6H13NO	3.5671	-	C19492	pos	-	-	-	-	Not Available	Not Available	272.233	0.0307860500155	0	65.5	-1.68204	25038-54-4	Not Available	4.99	5.025	4.99	4.984	4.953	4.977	4.975	4.982	4.972	5.008	4.948	5.005	4.979	4.944	4.992	4.992	4.924	5.005	5.095	5.052	4.952	4.979	4.995
pos_2200	Val Ile	缬氨酸 异亮氨酸	metab_1757	B(i)	-	-	-	M+H	C11H22N2O3	3.5937	-	-	pos	-	-	-	-	-	-	231.17	0.205651	37.2	0	-1.14673	-	-	3.416	3.487	3.917	3.641	3.685	3.863	3.997	3.862	3.38	3.815	4.048	3.707	3.955	3.941	3.698	3.618	3.676	3.389	3.985	4.163	3.965	3.713	3.787
pos_2220	CDP-DG(PGJ2/18:1(11Z))	-	metab_1779	B(ii)	-	-	HMDB0291108	M+H+Na	C50H81N3O17P2	3.6914	-	-	pos	-	-	-	-	Not Available	Not Available	540.755	0.155557	0	48.6	9.612554703751133	-	Not Available	5.652	5.751	5.75	5.867	6.014	5.921	5.92	6.071	5.775	5.402	5.925	5.893	5.912	5.624	5.824	6.133	5.958	5.808	5.739	5.897	6.049	5.913	5.735
pos_2236	9-Carboxymethoxymethylguanine	9 -羧甲氧甲基鸟嘌呤	metab_1795	B(ii)	-	-	HMDB0060805	M+H-2H2O	C8H9N5O4	3.7584	-	-	pos	-	-	-	-	Organoheterocyclic compounds	Imidazopyrimidines	204.05	0.108146	0	34.3	-7.84472	-	Purines and purine derivatives	5.432	5.409	5.463	5.388	5.442	5.421	5.485	5.445	5.46	5.427	5.452	5.432	5.437	5.45	5.469	5.468	5.416	5.426	5.583	5.479	5.436	5.438	5.479
pos_224	3-Indolepropionic acid	吲哚丙酸	metab_1799	B(i)	-	-	HMDB0002302	M+H, M+2Na-H, M+H-H2O	C11H11NO2	6.0171	-	-	pos	-	-	-	-	Organoheterocyclic compounds	Indoles and derivatives	190.086	0.0330806	97.8	0	-1.59377	830-96-6	Indolyl carboxylic acids and derivatives	5.205	4.753	4.335	4.955	5.054	4.968	5.067	4.979	4.813	4.886	5.039	5.262	5.198	4.943	4.997	5.184	5.103	5.148	5.178	5.021	4.807	4.781	4.807
pos_2242	Bursin	-	metab_1802	B(ii)	-	-	HMDB0249447	M+CH3OH+H	C14H25N7O3	3.7939	-	-	pos	-	-	-	-	Organic acids and derivatives	Carboxylic acids and derivatives	372.238	0.228573	0	32.8	6.53235507048584	-	Amino acids, peptides, and analogues	5.009	4.624	4.865	4.641	4.849	4.795	4.847	4.831	4.501	4.893	5.013	4.904	4.907	5.25	4.938	4.983	4.871	4.884	5.326	4.808	4.88	4.756	4.833
pos_2247	Isovalerylcarnitine	异戊酰肉碱	metab_1807	B(ii)	-	-	LMFA07070076;HMDB0000688	M+H	C12H23NO4	3.8206	-	C20826	pos	-	-	-	-	Lipids and lipid-like molecules	Fatty Acyls	246.17	0.133935	0	37.9	-1.49995	31023-24-2	Fatty acid esters	6.026	5.929	5.851	5.817	6.041	5.957	5.981	6.093	5.931	5.945	6.075	6.155	6.06	6.215	6.075	6.023	6.21	6.019	6.202	6.171	6.439	6.141	6.107
pos_2249	Hexanoyllysine	己酰赖氨酸	metab_1809	B(ii)	-	-	HMDB0253149	M+H-2H2O	C12H24N2O3	3.8312	-	-	pos	-	-	-	-	Organic acids and derivatives	Carboxylic acids and derivatives	209.165	0.0267345767123	0	33	-1.27924	-	Amino acids, peptides, and analogues	5.381	5.372	5.376	5.345	5.38	5.38	5.377	5.34	5.367	5.388	5.373	5.366	5.363	5.37	5.379	5.379	5.351	5.323	5.476	5.376	5.356	5.347	5.369
pos_2256	4-(2-Aminophenyl)-2,4-dioxobutanoic acid	4-（2-氨基苯基）-2,4-二氧代丁酸	metab_1817	B(ii)	map01100;map00380	Metabolic pathways;Tryptophan metabolism	HMDB0000978;PW_C000778	M+H-H2O	C10H9NO4	3.8686	代谢途径;色氨酸代谢	C01252	pos	-	-	Metabolism;Metabolism	Global and overview maps;Amino acid metabolism	Organic oxygen compounds	Organooxygen compounds	190.05	0.0414211866879	0	57.6	-1.38712	90924-76-8	Carbonyl compounds	4.206	3.986	4.216	4.018	4.183	4.152	4.143	4.035	4.196	4.119	4.144	4.235	4.671	4.483	4.123	4.162	4.025	4.268	4.218	4.09	4.425	4.206	3.941
pos_2266	4-hydroxysphinganine	4-羟二氢鞘氨醇	metab_1828	B(ii)	map00600;map01100	Sphingolipid metabolism;Metabolic pathways	HMDB0304183;LMSP01030001	M+K	C18H39NO3	3.9058	鞘脂代谢;代谢途径	C12144	pos	-	-	Metabolism;Metabolism	Lipid metabolism;Global and overview maps	Organic nitrogen compounds	Organonitrogen compounds	356.254	0.0282559658231	0	67.7	-7.34814	-	Amines	5.007	4.99	5.03	4.989	5.024	5.033	5.048	4.993	5.004	5.053	5.016	5.037	5.01	5.03	5.032	5.041	4.999	4.983	5.177	5.049	5.026	5.004	5.035
pos_2272	3-Oxoheptanoylcarnitine	3 -氧代庚酰基肉碱	metab_1835	B(ii)	-	-	HMDB0241693	M+H-2H2O	C14H25NO5	3.9272	-	-	pos	-	-	-	-	Lipids and lipid-like molecules	Fatty Acyls	252.159	0.267758	0	47.6	-1.569	-	Fatty acid esters	4.015	3.985	4.13	4.07	4.125	4.169	4.187	4.112	4.107	4.234	4.196	4.222	4.227	4.196	4.222	4.26	4.235	4.204	4.474	4.278	4.318	4.22	4.262
pos_2278	Beta-Hydroxy-gamma-trimethylaminobutyric acid	-	metab_1841	B(ii)	-	-	HMDB0244982	M+H-H2O	C7H15NO3	3.9484	-	-	pos	-	-	-	-	Organic acids and derivatives	Carboxylic acids and derivatives	144.102	0.0767453236486	0	37.1	-1.15873	-	Amino acids, peptides, and analogues	3.292	4.605	2.916	2.712	4.046	3.881	5.155	3.106	2.814	4.533	3.166	4.63	3.347	3.624	4.857	4.337	4.126	3.078	3.738	5.085	4.17	4.323	4.037
pos_2280	Voriconazole	伏立康唑	metab_1844	B(ii)	-	-	HMDB0014720;MJDBOTE0000869	M+NH4	C16H14F3N5O	3.9537	-	C07622	pos	-	-	-	-	Benzenoids	Benzene and substituted derivatives	367.149	0.201026	0	40.2	1.6976896404454198	137234-62-9	Phenylpropanes	3.514	3.704	2.541	3.391	3.604	3.34	3.706	2.509	2.884	3.8	3.171	3.783	3.6	2.554	4.091	4.094	4.01	2.535	4.203	4.184	3.958	2.771	3.645
pos_2296	PS(15:0/20:3(6,8,11)-OH(5))	-	metab_1861	B(ii)	-	-	HMDB0281104	M+H+Na	C41H74NO11P	4.0124	-	-	pos	-	-	-	-	Not Available	Not Available	405.744	0.0333875577655	0	51	-9.47221	-	Not Available	3.766	4.196	4.446	4.175	4.033	4.307	4.579	4.189	4.527	3.254	4.379	4.337	4.323	4.076	4.567	4.033	4.482	3.576	4.079	4.437	4.033	4.553	4.038
pos_2300	Beta-Tyrosine	β -酪氨酸	metab_1867	B(ii)	map00350	Tyrosine metabolism	HMDB0003831	M+H-H2O	C9H11NO3	4.023	酪氨酸代谢	C04368	pos	-	-	Metabolism	Amino acid metabolism	Organic acids and derivatives	Carboxylic acids and derivatives	164.07	0.105739	0	69.3	-1.25352	-	Amino acids, peptides, and analogues	4.073	4.074	2.422	3.965	3.557	3.856	3.98	4.088	2.406	3.643	3.591	3.91	4.013	4.152	3.895	4.25	4.023	4.175	4.127	4.11	4.011	3.479	3.517
pos_2307	7,8-diaminopelargonate	7，8 -二氨基庚二酸酯	metab_1874	B(ii)	map01100;map00780;map01240	Metabolic pathways;Biotin metabolism;Biosynthesis of cofactors	HMDB0304236	2M+Na	C9H20N2O2	4.0337	代谢途径;生物素代谢;辅助因子的生物合成	C01037	pos	-	-	Metabolism;Metabolism;Metabolism	Global and overview maps;Metabolism of cofactors and vitamins;Global and overview maps	Lipids and lipid-like molecules	Fatty Acyls	399.296	0.0308580172288	0	60.5	4.79860193280243	-	Fatty acids and conjugates	4.954	4.897	4.928	4.919	4.949	4.959	4.968	4.939	4.935	4.945	4.899	4.937	4.889	4.963	4.966	4.975	4.906	4.927	5.156	4.931	5.036	4.93	4.957
pos_2310	Aminocaproic acid	氨基己酸	metab_1878	B(ii)	map01100	Metabolic pathways	PW_C001268;HMDB0001901	M+H-H2O	C6H13NO2	4.0496	代谢途径	C02378	pos	-	-	Metabolism	Global and overview maps	Lipids and lipid-like molecules	Fatty Acyls	114.091	0.0507005590691	0	73.1	-1.30836	60-32-2	Fatty acids and conjugates	6.252	6.246	6.262	6.235	6.265	6.267	6.275	6.24	6.263	6.284	6.266	6.272	6.263	6.269	6.285	6.266	6.249	6.237	6.383	6.286	6.263	6.254	6.28
pos_2311	Gamma-Glu-leu	γ-谷氨酰-亮氨酸	metab_1879	B(i)	-	-	HMDB0011171	M+H	C11H20N2O5	4.0496	-	-	pos	-	-	-	-	Organic acids and derivatives	Carboxylic acids and derivatives	261.144	0.0192735841148	94.1	0	-1.45922	2566-39-4	Amino acids, peptides, and analogues	5.542	5.251	5.347	5.265	5.52	5.408	5.456	5.354	5.233	5.474	5.499	5.509	5.406	5.463	5.429	5.44	5.325	5.372	5.648	5.363	5.535	5.28	5.443
pos_2316	2,5,8,11,14-Pentaoxahexadecan-16-ol	2，5，8，11，14 -五氧杂十六烷- 16 -醇	metab_1884	B(i)	-	-	-	M+H	C11H24O6	4.0709	-	-	pos	-	-	-	-	-	-	253.164	0.0522273747684	43.4	0	-1.28356	-	-	4.426	4.538	4.41	4.58	4.449	4.487	4.33	4.502	4.433	4.598	4.507	4.537	4.495	4.572	4.485	4.455	4.577	4.654	3.516	4.286	4.503	4.482	4.595
pos_2322	Pro-Pro-Phe	脯氨酸-脯氨酸-苯丙氨酸	metab_1891	B(ii)	-	-	HMDB0304811	M+H	C19H25N3O4	4.0923	-	-	pos	-	-	-	-	Organic acids and derivatives	Carboxylic acids and derivatives	360.19	0.203461	0	38.7	-5.45123	-	Amino acids, peptides, and analogues	4.09	3.984	3.976	3.985	4.055	4.059	4.128	4.07	4.023	4.142	4.08	4.083	4.064	4.126	4.207	4.235	4.168	4.181	4.5	4.214	4.364	4.179	4.209
pos_2342	S-(PGJ2)-glutathione	S-（PGJ2）-谷胱甘肽	metab_1913	B(ii)	-	-	HMDB0013063	M+CH3OH+H	C30H47N3O10S	4.1614	-	-	pos	-	-	-	-	Organic acids and derivatives	Carboxylic acids and derivatives	674.334	0.0917647740558	0	47.3	3.825441716053549	-	Amino acids, peptides, and analogues	5.07	5.213	5.4	5.32	5.08	5.285	5.193	5.156	5.109	5.228	5.478	5.473	5.149	5.561	5.213	5.224	5.232	4.368	5.506	5.121	4.784	4.696	5.467
pos_2346	PI(18:1(9Z)/LTE4)	-	metab_1917	B(ii)	-	-	HMDB0276582	M+2Na	C50H86NO16PS	4.1989	-	-	pos	-	-	-	-	Not Available	Not Available	532.758	0.0451572427541	0	67.9	-2.66278	-	Not Available	5.802	5.865	5.906	5.865	5.948	5.892	6.039	6.082	5.873	5.932	5.929	5.833	6.01	5.791	5.941	6.067	6.055	6.051	5.691	6.161	6.113	6.156	5.818
pos_2349	Nona-3,7-dienedioylcarnitine	壬- 3，7 -二烯二酰基肉碱	metab_1920	B(ii)	-	-	HMDB0241773	M+H-2H2O	C16H25NO6	4.2148	-	-	pos	-	-	-	-	Lipids and lipid-like molecules	Fatty Acyls	292.157	0.228629	0	36.6	9.14882387418088	-	Fatty acid esters	3.945	3.516	3.571	3.39	3.742	3.643	3.382	3.784	3.804	3.586	3.848	3.991	3.984	4.165	4.217	3.988	4.072	3.862	4.086	4.117	3.879	4.082	4.104
pos_2359	Oxindole	2-吲哚酮	metab_1931	B(i)	map01100	Metabolic pathways	HMDB0061918;HMDB0244886	M+H	C8H7NO	4.236	代谢途径	C12312	pos	-	-	Metabolism	Global and overview maps	Organoheterocyclic compounds	Indoles and derivatives	134.06	0.280905	89.3	0	-1.10552	59-48-3	Indolines	4.147	3.913	3.976	3.953	4.02	4.019	4.094	4.076	4.094	3.886	3.883	4.155	3.823	4.196	4.378	4.249	4.122	4.057	4	4.146	4.098	4.036	3.991
pos_2361	PS(16:1(9Z)/5-iso PGF2VI)	-	metab_1934	B(ii)	-	-	HMDB0281258	M+2Na	C40H70NO13P	4.236	-	-	pos	-	-	-	-	Not Available	Not Available	424.721	0.100282	0	71.7	6.147929099749909	-	Not Available	4.498	4.523	4.501	4.584	4.803	4.622	4.678	4.961	4.67	4.359	4.435	4.404	4.857	4.348	4.328	4.963	4.825	5.048	3.825	5.064	4.943	4.931	4.481
pos_2368	Ile Leu	异亮氨酸 亮氨酸	metab_1941	B(i)	-	-	-	M+H	C12H24N2O3	4.2573	-	-	pos	-	-	-	-	-	-	245.186	0.0367917161453	45.7	0	-1.61095	-	-	4.37	4.366	4.445	4.263	4.463	4.378	4.343	4.384	4.104	4.654	4.615	4.62	4.441	4.522	4.472	4.483	4.24	3.936	4.564	4.509	4.457	3.957	4.603
pos_2372	5,16-Androstadien-3beta-ol	-	metab_1946	B(ii)	-	-	HMDB0248392	M+ACN+Na	C19H28O	4.2679	-	-	pos	-	-	-	-	Lipids and lipid-like molecules	Steroids and steroid derivatives	336.228	0.0162030511815	0	35.4	-7.71014	-	Androstane steroids	5.053	5.013	5.032	5.008	5.033	5.025	5.041	5.034	5.032	5.066	5.046	5.036	5.041	5.037	5.06	5.057	4.99	5.01	5.161	5.059	5.042	5.014	5.068
pos_2389	Hyaluronan biosynthesis, precursor 1	-	metab_1964	B(ii)	-	-	HMDB0060071	M+H-2H2O	C14H21NO11	4.3052	-	C04794	pos	-	-	-	-	Organic oxygen compounds	Organooxygen compounds	344.097	0.185032	0	31.4	-2.43554	-	Carbohydrates and carbohydrate conjugates	4.187	4.104	3.728	3.846	4.214	4.085	4.047	4.028	4.281	4.191	4.139	3.891	3.964	4.187	4.376	4.227	4.263	4.151	4.258	4.289	4.062	3.991	3.939
pos_2395	Butanal	正丁醛	metab_1970	B(i)	map01100;map00650	Metabolic pathways;Butanoate metabolism	HMDB0003543	M+H	C4H8O	4.3318	代谢途径;丁酸代谢	C01412	pos	-	-	Metabolism;Metabolism	Global and overview maps;Carbohydrate metabolism	Organic oxygen compounds	Organooxygen compounds	73.0647	0.0901376774596	58.7	0	-0.726321	123-72-8	Carbonyl compounds	4.477	4.582	4.477	4.449	4.491	4.497	4.561	4.47	4.471	4.156	4.536	4.525	4.491	4.488	4.61	4.517	4.537	4.504	4.61	4.57	4.527	4.524	4.496
pos_2399	N-methylsphingosine	-	metab_1974	B(ii)	-	-	HMDB0255191	M+2Na-H	C19H37NO3	4.3427	-	-	pos	-	-	-	-	Organic oxygen compounds	Organooxygen compounds	372.249	0.221451	0	37.5	0.28606280365561604	-	Alcohols and polyols	4.632	4.663	4.692	4.635	4.707	4.704	4.707	4.738	4.692	4.772	4.717	4.741	4.738	4.753	4.791	4.783	4.764	4.759	4.906	4.823	4.789	4.766	4.806
pos_242	PE(16:1(9Z)/22:6(4Z,7Z,10Z,13Z,16Z,19Z))	-	metab_1998	B(ii)	map01100;map00564;map00563;map04136;map05167;map04723;map04140	Metabolic pathways;Glycerophospholipid metabolism;Glycosylphosphatidylinositol (GPI)-anchor biosynthesis;Autophagy - other;Kaposi sarcoma-associated herpesvirus infection;Retrograde endocannabinoid signaling;Autophagy - animal	LMGP02011216;PW_C005027;HMDB0008979	M+H+Na, M+Na, M+2Na	C43H72NO8P	5.164	代谢途径;甘油磷脂代谢;糖基磷脂酰肌醇（GPI）-锚定生物合成;自噬-其他;卡波西肉瘤相关疱疹病毒感染;逆行内源性大麻素信号传导;自噬-动物	C00350	pos	Lipids	Phospholipids	Metabolism;Metabolism;Metabolism;Cellular Processes;Human Diseases;Organismal Systems;Cellular Processes	Global and overview maps;Lipid metabolism;Glycan biosynthesis and metabolism;Transport and catabolism;Infectious disease: viral;Nervous system;Transport and catabolism	Lipids and lipid-like molecules	Glycerophospholipids	392.748	0.00592780659294	0	32.8	0.12687602812575802	-	Glycerophosphoethanolamines	5.849	5.944	5.851	6.029	5.874	5.922	5.578	5.913	5.945	5.911	5.925	5.9	5.915	5.923	5.909	5.883	5.907	6.093	4.661	5.723	5.875	5.927	5.923
pos_2424	Dihydromorphine	二氢吗啡	metab_2003	B(ii)	-	-	HMDB0253251;HMDB0060548;PW_C040727	M+H-2H2O	C17H21NO3	4.4068	-	C11782	pos	-	-	-	-	Alkaloids and derivatives	Morphinans	252.139	0.0808182952507	0	31.4	1.3665847875590602	509-60-4	Not Available	4.411	4.37	4.407	4.359	4.414	4.41	4.427	4.39	4.413	4.424	4.435	4.392	4.395	4.447	4.452	4.434	4.44	4.425	4.608	4.451	4.458	4.406	4.436
pos_2427	Phytosphingosine	植物鞘氨醇	metab_2006	B(ii)	map00600;map01100	Sphingolipid metabolism;Metabolic pathways	HMDB0004610;LMSP01030001	M+K	C18H39NO3	4.4174	鞘脂代谢;代谢途径	C12144	pos	-	-	Metabolism;Metabolism	Lipid metabolism;Global and overview maps	Organic nitrogen compounds	Organonitrogen compounds	356.254	0.0080660561153	0	58.9	-7.35231	554-62-1	Amines	5.035	4.959	5.029	4.996	5.062	5.023	4.997	4.999	5.024	5.031	5.029	5.024	5.006	4.982	4.983	5.007	4.986	4.988	5.141	5.017	5.002	5.006	5.028
pos_2433	5alpha-Androstane-3beta,7alpha,17beta-triol	5alpha-雄甾烷-3beta，7alpha，17beta-三醇	metab_2013	B(ii)	-	-	HMDB0247012	M+ACN+Na	C19H32O3	4.4387	-	-	pos	-	-	-	-	Lipids and lipid-like molecules	Steroids and steroid derivatives	372.248	0.208114	0	35	-8.48083	-	Androstane steroids	4.061	3.917	3.995	3.992	4.1	4.06	3.972	4.071	4.029	4.074	4.003	4.132	4.048	4.042	4.145	4.172	4.1	4.146	4.253	4.201	4.088	4.099	4.251
pos_2438	MG(14:1(9Z)/0:0/0:0)	-	metab_2018	B(ii)	-	-	HMDB0011562	M+ACN+H	C17H32O4	4.4706	-	-	pos	-	-	-	-	Lipids and lipid-like molecules	Glycerolipids	342.265	0.0146695299997	0	56.6	4.88600469612341	-	Monoradylglycerols	5.637	5.633	5.68	5.615	5.641	5.669	5.657	5.634	5.661	5.68	5.646	5.669	5.667	5.67	5.68	5.664	5.621	5.612	5.782	5.677	5.659	5.648	5.679
pos_2441	Riboflavin (Vitamin B2)	核黄素（维生素B2）	metab_2022	B(i)	-	-	-	M+H	C17H20N4O6	4.5025	-	-	pos	-	-	-	-	-	-	377.145	0.0272161552297	65.5	0	-2.06408	-	-	4.909	4.84	5.019	4.862	4.941	4.958	4.818	4.934	4.799	4.936	4.979	4.955	4.931	5.077	5.038	4.985	4.959	4.8	5.097	4.909	4.885	4.794	4.89
pos_2443	N-Jasmonoylisoleucine	N -茉莉酸基异亮氨酸	metab_2024	B(ii)	-	-	HMDB0029391	M+Na	C18H29NO4	4.5134	-	C18699	pos	-	-	-	-	Organic acids and derivatives	Carboxylic acids and derivatives	346.197	0.0274519161458	0	41.7	-6.27301	120330-93-0	Amino acids, peptides, and analogues	4.076	3.988	4.263	3.935	2.885	3.923	4.227	3.286	3.558	3.96	4.463	4.157	3.577	4.177	4.068	4.192	4.397	3.332	4.464	4.632	3.44	4.206	4.086
pos_2444	Leucyl-Isoleucine	亮氨酰基异亮氨酸	metab_2025	B(ii)	-	-	HMDB0028932	M+H-2H2O	C12H24N2O3	4.5187	-	-	pos	-	-	-	-	Organic acids and derivatives	Carboxylic acids and derivatives	209.165	0.0160739328385	0	35.9	-1.2166	-	Amino acids, peptides, and analogues	3.978	4.035	3.992	3.971	3.943	3.956	3.96	3.995	3.981	3.994	3.934	3.961	3.976	4.014	4.013	3.944	3.952	3.923	4.153	3.994	4.011	3.906	3.966
pos_245	(5Z)-(15S)-11alpha-Hydroxy-9,15-dioxoprostanoate	（5Z）-（15S）-11α-羟基-9,15-二氧代丙酸酯	metab_2031	B(ii)	-	-	HMDB0002776;HMDB0012481	M+H-H2O, M+H, M+H-2H2O	C20H32O5	6.1067	-	C04671	pos	-	-	-	-	Lipids and lipid-like molecules	Fatty Acyls	335.221	0.0400639786499	0	68.9	-1.48475	363-23-5	Eicosanoids	6.074	5.79	5.821	5.596	5.885	5.849	6.386	5.708	6.268	6.016	6.002	5.946	5.92	5.946	6.24	6.174	6.218	5.985	5.665	6.256	6.019	6.041	5.896
pos_2459	Sapacitabine	N-[1-[(2R,3S,4S,5R)-3-氰基-4-羟基-5-(羟甲基)氧杂环戊-2-基]-2-氧代嘧啶-4-基]十六酰胺	metab_2041	B(ii)	-	-	HMDB0257481	M+H	C26H42N4O5	4.54	-	-	pos	-	-	-	-	Nucleosides, nucleotides, and analogues	Pyrimidine nucleosides	491.32	0.127745	0	47.5	-6.15927	-	Pyrimidine 2''-deoxyribonucleosides	4.111	4.116	4.152	4.076	4.202	4.07	4.24	4.129	4.051	4.202	4.19	4.227	4.085	4.125	3.979	4.203	4.163	4.085	4.29	4.118	4.146	4.013	4.101
pos_247	N-Undecanoylglycine	N -十一酰甘氨酸	metab_2053	B(ii)	-	-	HMDB0013286	M+H-H2O, M+H, M+2Na-H	C13H25NO3	6.1119	-	-	pos	-	-	-	-	Organic acids and derivatives	Carboxylic acids and derivatives	226.18	0.205638	0	36.2	-1.47644	-	Amino acids, peptides, and analogues	5.564	5.484	5.533	5.377	5.622	5.608	5.529	5.413	5.478	5.502	5.454	5.419	5.436	5.447	5.463	5.482	5.404	5.412	5.871	5.541	5.426	5.421	5.446
pos_2470	4-Chloro-L-phenylalanine	4 -氯- L -苯丙氨酸	metab_2054	B(ii)	-	-	HMDB0244605	M+ACN+H	C9H10ClNO2	4.5879	-	-	pos	-	-	-	-	Organic acids and derivatives	Carboxylic acids and derivatives	241.073	0.0434626256792	0	71.5	-1.83918	-	Amino acids, peptides, and analogues	6.753	6.735	6.758	6.683	6.755	6.736	6.719	6.751	6.739	6.725	6.706	6.714	6.7	6.758	6.739	6.729	6.754	6.733	6.874	6.781	6.722	6.744	6.752
pos_2473	Hypoglycin B	-	metab_2057	B(ii)	-	-	HMDB0029428	M+ACN+Na	C12H18N2O5	4.6307	-	C08280	pos	-	-	-	-	Organic acids and derivatives	Carboxylic acids and derivatives	334.139	0.0158328753008	0	30.6	7.20017989799024	502-37-4	Amino acids, peptides, and analogues	4.315	3.914	4.213	4.11	4.398	4.219	4.199	4.189	4.306	4.345	4.375	4.343	4.298	4.469	4.306	4.28	4.319	4.245	4.536	4.167	4.351	4.126	4.259
pos_2475	6-Hydroxymethylpterin	6 -羟甲基蝶呤	metab_2059	B(ii)	-	-	HMDB0247079	2M+NH4	C7H7N5O2	4.636	-	-	pos	-	-	-	-	Organoheterocyclic compounds	Pteridines and derivatives	404.155	0.243462	0	33.2	1.99412654481489	-	Pterins and derivatives	4.158	4.128	4.295	3.965	4.16	4.118	4.25	4.154	4.198	4.368	4.138	4.102	4.313	4.479	4.321	4.275	4.209	3.85	4.626	3.876	4.307	3.83	4.37
pos_2481	Phthalide	苯酞	metab_2066	B(ii)	-	-	HMDB0032469	M+ACN+H	C8H6O2	4.6627	-	C18611	pos	-	-	-	-	Organoheterocyclic compounds	Isocoumarans	176.07	0.143377	0	32.4	-1.97187	87-41-2;27355-22-2	Isobenzofuranones	3.774	3.711	3.464	3.87	3.834	3.784	3.853	3.754	3.892	3.183	3.36	3.856	3.579	3.587	4.197	3.987	3.843	3.779	3.609	4.001	3.915	3.94	3.666
pos_2486	Leucyl-leucine	亮氨酰-亮氨酸	metab_2071	B(ii)	-	-	HMDB0254039;HMDB0028933	M+H-2H2O	C12H24N2O3	4.6681	-	C11332	pos	-	-	-	-	Organic acids and derivatives	Carboxylic acids and derivatives	209.164	0.00410436199517	0	41.6	-1.44328	3303-31-9;2883-36-5	Amino acids, peptides, and analogues	4.393	4.411	4.427	4.408	4.463	4.424	4.401	4.402	4.439	4.443	4.407	4.429	4.432	4.444	4.448	4.399	4.372	4.371	4.533	4.392	4.446	4.443	4.433
pos_2516	Trans-4-Carboxymethylenebut-2-en-4-olide	-	metab_2105	B(ii)	-	-	HMDB0060518	M+NH4	C6H4O4	4.7856	-	C12838	pos	-	-	-	-	Organoheterocyclic compounds	Dihydrofurans	158.045	0.0695555276209	0	38.5	-1.50574	-	Furanones	5.029	4.893	4.941	5.097	5.014	5.007	4.894	4.977	5.128	4.942	5.124	5.051	4.763	5.175	4.877	5.038	5.047	4.976	5.076	5.031	4.993	4.967	4.643
pos_2518	3-Methylpentanoylcarnitine	3 -甲基戊酰肉碱	metab_2107	B(ii)	-	-	HMDB0241033	M+H	C13H25NO4	4.7962	-	-	pos	-	-	-	-	Lipids and lipid-like molecules	Fatty Acyls	260.185	0.136932	0	50.3	-1.86629	-	Fatty acid esters	4.089	3.935	3.888	3.856	4.005	3.964	3.913	4.058	3.712	3.959	3.881	4.12	4.164	4.06	4.09	4.092	4.253	4.029	4.75	4.222	4.92	4.239	4.136
pos_2526	4-(pyrazine-2-carbonyl)-1,3-dihydroquinoxalin-2-one	4-（吡嗪-2-羰基）-1,3-二氢喹喔啉-2-酮	metab_2116	B(i)	-	-	-	M+H	C13H10N4O2	4.813	-	-	pos	-	-	-	-	-	-	255.089	0.148871	47	0	5.55097505599896	-	-	3.522	4.722	2.45	2.495	4.115	4.124	5.132	2.417	2.433	4.549	3.238	4.675	2.7	3.881	4.93	4.571	4.432	2.443	3.984	5.298	4.211	4.518	4.236
pos_2532	Capsicoside A1	辣椒苷A1	metab_2123	B(ii)	-	-	HMDB0303762	M+ACN+H	C33H54O9	4.8344	-	-	pos	-	-	-	-	Lipids and lipid-like molecules	Steroids and steroid derivatives	636.415	0.160295	0	52.9	7.53312687741287	-	Steroidal glycosides	5.473	5.522	5.383	5.606	5.384	5.459	4.987	5.418	5.473	5.385	5.32	5.35	5.31	5.403	5.326	5.308	5.353	5.582	3.228	5.078	5.225	5.331	5.327
pos_2535	Verdamicin	-	metab_2126	B(ii)	-	-	HMDB0259789	M+2Na	C20H39N5O7	4.845	-	-	pos	-	-	-	-	Organic oxygen compounds	Organooxygen compounds	253.63	0.260978	0	33	-8.2011	-	Carbohydrates and carbohydrate conjugates	2.836	2.691	4.921	4.812	4.769	4.613	4.086	2.653	2.669	4.591	2.696	2.696	2.666	2.698	2.685	2.664	2.683	2.679	4.835	2.629	4.391	2.655	2.684
pos_2538	2',3-Dimethyl-4-aminobiphenyl	2 '，3 -二甲基- 4 -氨基联苯	metab_2129	B(ii)	-	-	HMDB0246347	M+H	C14H15N	4.861	-	-	pos	-	-	-	-	Benzenoids	Benzene and substituted derivatives	198.127	0.0575427577426	0	49.5	-1.55364	-	Biphenyls and derivatives	4.648	4.686	4.698	4.672	4.683	4.725	4.657	4.613	4.698	4.763	4.671	4.72	4.626	4.709	4.714	4.653	4.643	4.625	4.88	4.669	4.658	4.613	4.7
pos_2547	Scopoletin	东莨菪素	metab_2139	B(ii)	-	-	HMDB0034344;MJDBOTE0001128	M+NH4	C10H8O4	4.8929	-	C01752	pos	-	-	-	-	Phenylpropanoids and polyketides	Coumarins and derivatives	210.076	0.186801	0	46.5	-2.35078	92-61-5	Hydroxycoumarins	4.648	4.097	3.074	3.082	4	4.042	3.02	3.45	3.058	3.087	3.085	3.085	3.055	3.721	3.074	3.053	3.072	3.068	4.16	3.018	3.046	3.044	3.386
pos_2551	Pimelylcarnitine	吡喃肉碱	metab_2144	B(ii)	-	-	HMDB0013328	M+NH4	C14H25NO6	4.9034	-	-	pos	-	-	-	-	Lipids and lipid-like molecules	Fatty Acyls	321.201	0.0502260570631	0	33.2	-2.84675	-	Fatty acid esters	4.58	4.578	4.639	4.533	4.691	4.577	4.588	4.619	4.65	4.677	4.604	4.573	4.631	4.635	4.652	4.579	4.571	4.599	4.756	4.603	4.6	4.58	4.702
pos_2578	CDP-DG(22:5(7Z,10Z,13Z,16Z,19Z)/18:2(9Z,12Z))	-	metab_2173	B(ii)	map01100;map00564;map04070	Metabolic pathways;Glycerophospholipid metabolism;Phosphatidylinositol signaling system	HMDB0116025;PW_C063168	M+H+Na	C52H83N3O15P2	4.9724	代谢途径;甘油磷脂代谢;磷脂酰肌醇信号系统	C00269	pos	-	-	Metabolism;Metabolism;Environmental Information Processing	Global and overview maps;Lipid metabolism;Signal transduction	Lipids and lipid-like molecules	Glycerophospholipids	537.768	0.225972	0	74.3	9.350334739332462	-	CDP-glycerols	4.768	4.934	4.932	4.913	4.945	4.976	4.921	5.09	4.703	4.665	5.125	4.948	4.954	5.033	4.918	4.829	5.22	4.895	4.921	5.214	5.023	4.841	4.951
pos_2582	N-Acetyltyrosine	N -乙酰酪氨酸	metab_2178	B(ii)	-	-	HMDB0000866;HMDB0244966	M+H-2H2O	C11H13NO4	4.983	-	C01657	pos	-	-	-	-	Organic acids and derivatives	Carboxylic acids and derivatives	188.07	0.115405	0	64	-1.59168	537-55-3	Amino acids, peptides, and analogues	2.359	4.471	2.353	2.361	3.817	3.512	5.026	2.321	2.337	4.345	2.364	4.518	2.334	2.648	4.84	4.192	4.175	2.347	2.486	5.003	3.69	4.087	3.385
pos_2586	VASICINONE	鸭嘴花碱酮	metab_2182	B(ii)	-	-	HMDB0259770	M+ACN+H	C11H10N2O2	4.9884	-	C10744	pos	-	-	-	-	Organoheterocyclic compounds	Diazanaphthalenes	244.108	0.20686	0	37.5	-1.95082	486-64-6	Benzodiazines	1.257	4.53	1.252	1.259	3.902	3.445	5.117	1.221	1.236	4.47	1.262	4.618	1.233	1.264	4.957	4.199	4.095	1.313	1.378	5.155	3.326	4.139	3.588
pos_2599	Ulimorelin	TZP-101（生长素释放肽受体(GRLN)激动剂）	metab_2196	B(ii)	-	-	HMDB0259396	M+H	C30H39FN4O4	5.0257	-	-	pos	-	-	-	-	Organic acids and derivatives	Carboxylic acids and derivatives	539.303	0.119992	0	45.1	0.35837433348163106	-	Amino acids, peptides, and analogues	4.422	4.56	4.566	4.567	4.471	4.467	3.88	4.587	4.518	4.463	4.507	4.435	4.499	4.404	4.449	4.458	4.324	4.738	5.536	3.639	4.36	4.445	4.466
pos_2606	2,4(1H,3H)-Pyrimidinedione, 5-fluoro-1-(tetrahydro-2-furanyl)-, (R)-	2,4（1H，3H）-嘧啶二酮，5-氟-1-（四氢呋喃基）-，（R）-	metab_2205	B(ii)	map00983	Drug metabolism - other enzymes	HMDB0246215	M+CH3OH+H	C8H9FN2O3	5.047	药物代谢-其它酶	C12673	pos	-	-	Metabolism	Xenobiotics biodegradation and metabolism	Organoheterocyclic compounds	Diazines	233.092	0.111732	0	38.5	-7.75947	-	Pyrimidines and pyrimidine derivatives	4.88	4.645	4.156	4.64	5.043	4.782	4.77	4.515	4.749	4.917	4.876	5.115	4.763	4.99	5.191	5.108	4.772	4.866	4.977	4.946	4.969	4.935	4.685
pos_2624	N-Nervonoyl Methionine	N -神经酰基蛋氨酸	metab_2225	B(ii)	-	-	HMDB0242096	M+H	C29H55NO3S	5.0735	-	-	pos	-	-	-	-	Organic acids and derivatives	Carboxylic acids and derivatives	498.401	0.0689047	0	55.7	6.030519623783902	-	Amino acids, peptides, and analogues	7.311	7.291	7.278	7.245	7.279	7.278	7.238	7.19	7.229	7.308	7.234	7.279	7.206	7.257	7.257	7.212	7.19	7.144	7.388	7.23	7.2	7.165	7.272
pos_2626	N-Acetylputrescine	N -乙酰腐胺	metab_2227	B(ii)	map01100;map00330	Metabolic pathways;Arginine and proline metabolism	HMDB0002064	2M+ACN+Na	C6H14N2O	5.0841	代谢途径;精氨酸和脯氨酸代谢	C02714	pos	-	-	Metabolism;Metabolism	Global and overview maps;Amino acid metabolism	Organic acids and derivatives	Carboximidic acids and derivatives	324.237	0.222804	0	31.6	1.90956700394819	5699-41-2;18233-70-0	Carboximidic acids	5.104	5.242	5.09	5.224	5.069	5.13	4.761	5.076	5.021	5.149	5.084	5.082	4.987	5.147	5.001	4.995	5.069	5.217	4.948	4.77	4.955	4.965	5.067
pos_2627	Erythromycylamine	红霉胺	metab_2228	B(ii)	-	-	HMDB0251939	M+H+Na	C37H70N2O12	5.095	-	-	pos	-	-	-	-	Organic oxygen compounds	Organooxygen compounds	379.248	0.103308	0	83.9	9.576026766765981	-	Carbohydrates and carbohydrate conjugates	5.705	5.787	5.741	5.89	5.751	5.796	5.443	5.775	5.818	5.83	5.857	5.857	5.845	5.856	5.831	5.81	5.75	5.956	4.496	5.65	5.791	5.807	5.88
pos_265	(2R,3R,4R)-2-Amino-4-hydroxy-3-methylpentanoic acid	（2R，3R，4R）-2-氨基-4-羟基-3-甲基戊酸	metab_2253	B(ii)	-	-	HMDB0029449;LMFA01050440	M+H-H2O, M+H, M+H-2H2O	C6H13NO3	0.6827	-	-	pos	-	-	-	-	Organic acids and derivatives	Carboxylic acids and derivatives	130.086	0.0332081105023	0	44.8	-1.18361	-	Amino acids, peptides, and analogues	5.574	5.567	5.645	5.546	5.584	5.606	5.681	5.488	5.544	5.51	5.531	5.845	5.628	5.74	5.805	5.638	5.612	5.531	5.692	5.572	5.447	5.626	5.579
pos_2654	Hypoxanthine	次黄嘌呤	metab_2258	B(i)	map01100;map01232;map00230	Metabolic pathways;Nucleotide metabolism;Purine metabolism	PW_C000102;HMDB0000157	M+H	C5H4N4O	5.1587	代谢途径;核苷酸代谢;嘌呤代谢	C00262	pos	-	-	Metabolism;Metabolism;Metabolism	Global and overview maps;Global and overview maps;Nucleotide metabolism	Organoheterocyclic compounds	Imidazopyrimidines	137.046	0.187196	39	0	-1.26408	68-94-0	Purines and purine derivatives	4.401	4.383	4.368	4.363	4.325	4.377	4.352	4.316	4.347	4.368	4.32	4.334	4.336	4.311	4.309	4.301	4.284	4.232	4.382	4.291	4.248	4.244	4.306
pos_267	3h-Adrenaline	-	metab_2275	B(ii)	-	-	HMDB0246263	M+H, M+CH3OH+H, M+NH4	C9H15NO3	0.6827	-	-	pos	-	-	-	-	Organic oxygen compounds	Organooxygen compounds	218.138	0.0428052304254	0	31.5	-1.90679	-	Alcohols and polyols	5.968	5.916	5.865	5.801	5.91	5.89	5.882	5.892	5.801	6.044	5.92	5.974	5.934	6.022	5.961	5.896	6.002	5.803	6.084	5.98	6.148	5.809	5.972
pos_2688	Gentamicin C	庆大霉素C	metab_2294	B(ii)	-	-	HMDB0252688	M+NH4	C19H39N5O7	5.2492	-	C01918	pos	Antibiotics	Aminoglycosides	-	-	Organic oxygen compounds	Organooxygen compounds	467.322	0.0646233863213	0	73.5	7.153125008195549	11097-82-8	Carbohydrates and carbohydrate conjugates	5.185	5.194	5.208	5.165	5.22	5.228	5.212	5.143	5.197	5.255	5.2	5.217	5.213	5.211	5.211	5.204	5.158	5.175	5.313	5.209	5.195	5.17	5.235
pos_2689	Adamantylamide-alanyl-isoglutamine	金刚烷胺-丙氨酰-异谷氨酰胺	metab_2295	B(ii)	-	-	HMDB0247998	M+NH4	C18H30N4O3	5.2545	-	-	pos	-	-	-	-	Organic acids and derivatives	Carboxylic acids and derivatives	368.264	0.162864	0	60.2	-5.47141	-	Amino acids, peptides, and analogues	5.276	5.412	5.258	5.437	5.229	5.33	4.949	5.327	5.247	5.286	5.284	5.257	5.229	5.312	5.249	5.201	5.264	5.438	5.137	5.026	5.167	5.249	5.243
pos_27	L-Valine	L-缬氨酸	metab_2307	B(i)	map01100;map04978;map00280;map01240;map01210;map02010;map01230;map00290;map04974;map00970;map00770;map05230	Metabolic pathways;Mineral absorption;Valine, leucine and isoleucine degradation;Biosynthesis of cofactors;2-Oxocarboxylic acid metabolism;ABC transporters;Biosynthesis of amino acids;Valine, leucine and isoleucine biosynthesis;Protein digestion and absorption;Aminoacyl-tRNA biosynthesis;Pantothenate and CoA biosynthesis;Central carbon metabolism in cancer	HMDB0000883;PW_C000704;MJDBOTE0000526	M+H, 2M+Na, 2M+K, M+Na	C5H11NO2	0.6297	代谢途径;矿物质吸收;缬氨酸、亮氨酸和异亮氨酸降解;辅助因子的生物合成;2-氧代羧酸代谢;ABC转运器;氨基酸生物合成;缬氨酸、亮氨酸和异亮氨酸生物合成;蛋白质的消化和吸收;氨酰基tRNA生物合成;泛酸和CoA生物合成;癌症的中心碳代谢	C00183	pos	Peptides	Amino acids	Metabolism;Organismal Systems;Metabolism;Metabolism;Metabolism;Environmental Information Processing;Metabolism;Metabolism;Organismal Systems;Genetic Information Processing;Metabolism;Human Diseases	Global and overview maps;Digestive system;Amino acid metabolism;Global and overview maps;Global and overview maps;Membrane transport;Global and overview maps;Amino acid metabolism;Digestive system;Translation;Metabolism of cofactors and vitamins;Cancer: overview	Organic acids and derivatives	Carboxylic acids and derivatives	118.086	0.017522	88.9	0	-1.62436	72-18-4	Amino acids, peptides, and analogues	6.629	6.614	6.676	6.649	6.609	6.651	6.704	6.582	6.606	6.76	6.696	6.649	6.688	6.705	6.67	6.629	6.542	6.64	6.833	6.597	6.705	6.566	6.672
pos_2704	Phe Trp	-	metab_2313	B(i)	-	-	-	M+H	C20H21N3O3	5.2975	-	-	pos	-	-	-	-	-	-	352.165	0.152774	48.7	0	-1.6106	-	-	4.483	4.393	4.609	4.31	4.054	4.413	4.056	4.071	4.497	4.31	4.314	4.241	4.224	4.487	4.292	4.273	4.388	4.193	4.545	4.148	4.235	4.305	4.222
pos_273	GPCho(2:0/18:3)	-	metab_2341	B(i)	-	-	-	M+H, M+Na, M+H-H2O	C28H50NO8P	6.2279	-	-	pos	-	-	-	-	-	-	560.334	0.0245645877729	46.2	0	-1.56145	-	-	7.278	7.216	7.166	6.869	6.359	7.08	7.311	6.714	6.938	7.461	7.339	7.222	6.83	7.373	6.976	7.172	7.394	6.236	7.383	7.316	6.477	6.898	7.017
pos_2753	4-ethylamino-6-isopropylamino-1,3,5-triazin-2-ol	4-乙氨基-6-异丙基氨基-1,3,5-三嗪-2-醇	metab_2367	B(ii)	map01100	Metabolic pathways	HMDB0062766	2M+NH4	C8H15N5O	5.3934	代谢途径	C06552	pos	-	-	Metabolism	Global and overview maps	Organoheterocyclic compounds	Triazines	412.29	0.232378	0	48.2	1.66472372253699	2163-68-0	1,3,5-triazines	5.265	5.372	5.253	5.379	5.227	5.268	4.891	5.252	5.23	5.258	5.23	5.231	5.185	5.237	5.177	5.155	5.233	5.412	5.078	5.005	5.09	5.194	5.218
pos_2765	Pantolactone	DL-泛酰内酯	metab_2379	B(ii)	-	-	HMDB0303902;HMDB0059876	2M+NH4	C7H12O2	5.4147	-	C01012	pos	-	-	-	-	Organoheterocyclic compounds	Lactones	274.201	0.0947281590595	0	31.8	-1.61393	599-04-2	Gamma butyrolactones	4.337	4.273	4.126	3.97	4.18	4.201	4.279	4.082	4.092	3.989	4.089	4.057	4.109	4.569	4.292	4.265	4.684	3.982	4.756	4.384	3.712	4.48	4.649
pos_2787	Cyclo(L-Phe-L-Pro)	-	metab_2403	B(ii)	-	-	HMDB0250631	M+H	C14H16N2O2	5.4575	-	C11847	pos	-	-	-	-	Organic acids and derivatives	Carboxylic acids and derivatives	245.128	0.0367917356326	0	36.1	-1.4223	3705-26-8	Amino acids, peptides, and analogues	4.044	3.949	4.038	3.979	4.067	4.048	4.046	4.078	4.01	4.032	4.144	3.96	4.1	4.437	4.044	4.17	3.986	4.031	4.077	4.064	3.913	4.01	4.156
pos_2795	Coumarin	香豆素	metab_2412	B(ii)	-	-	HMDB0001218	M+ACN+H	C9H6O2	5.4735	-	C05851	pos	-	-	-	-	Phenylpropanoids and polyketides	Coumarins and derivatives	188.07	0.0826362994396	0	35.4	-2.04154	91-64-5	Not Available	3.742	4.044	3.141	3.161	3.821	3.785	4.484	3.51	3.178	4.026	3.512	4.24	3.605	3.919	4.329	4.183	4.143	3.403	3.903	4.599	3.849	3.93	3.835
pos_282	M-Coumaric acid	-	metab_2440	B(i)	map01100;map00360	Metabolic pathways;Phenylalanine metabolism	HMDB0001713	M+H, M+NH4, M+H-H2O	C9H8O3	0.7623	代谢途径;苯丙氨酸代谢	C12621	pos	-	-	Metabolism;Metabolism	Global and overview maps;Amino acid metabolism	Phenylpropanoids and polyketides	Cinnamic acids and derivatives	182.081	0.0137293239614	45.1	0	-2.04752	14755-02-3	Hydroxycinnamic acids and derivatives	6.523	6.358	6.51	6.474	6.602	6.504	6.422	6.463	6.375	6.521	6.747	6.538	6.427	6.525	6.535	6.472	6.415	6.477	6.676	6.335	6.439	6.381	6.477
pos_2825	6-Hydroxydodeca-8,10-dienoylcarnitine	6 -羟基十二碳- 8，10 -二烯酰基肉碱	metab_2446	B(ii)	-	-	HMDB0241251	M+H	C19H33NO5	5.5481	-	-	pos	-	-	-	-	Lipids and lipid-like molecules	Fatty Acyls	356.243	0.164328	0	56.9	-1.75708	-	Fatty acid esters	4.232	4.263	4.435	3.632	4.042	4.231	4.023	3.868	4.021	4.522	4.471	3.914	4.341	4.965	4.355	4.089	4.239	3.539	4.706	4.082	4.213	3.878	4.112
pos_2844	Eugenol	丁子香酚	metab_2467	B(ii)	-	-	HMDB0005809;MJDBOTE0000375	M+CH3OH+H	C10H12O2	5.6228	-	C10453	pos	-	-	-	-	Benzenoids	Phenols	197.117	0.0547093523128	0	31.3	-1.73821	97-53-0	Methoxyphenols	4.473	4.087	4.67	4.548	4.588	4.516	4.653	4.442	4.565	4.469	4.492	4.478	4.717	4.657	4.535	4.744	4.409	4.433	4.736	4.514	4.449	4.155	4.634
pos_2849	Gamma-Glutamyl-S-methylcysteine sulfoxide	-	metab_2472	B(ii)	-	-	HMDB0031863	M+Na	C9H16N2O6S	5.6334	-	-	pos	-	-	-	-	Organic acids and derivatives	Carboxylic acids and derivatives	303.062	0.0625898	0	33.5	-2.01593	-	Amino acids, peptides, and analogues	4.628	4.654	4.65	4.644	4.67	4.652	4.679	4.603	4.648	4.665	4.679	4.707	4.705	4.69	4.673	4.654	4.634	4.631	4.805	4.689	4.669	4.607	4.693
pos_2876	Mulberrofuran T	桑呋喃T	metab_2502	B(ii)	-	-	HMDB0035940	2M+3H2O+2H	C44H44O9	5.6816	-	-	pos	-	-	-	-	Phenylpropanoids and polyketides	2-arylbenzofuran flavonoids	730.303	0.0333217733065	0	41.2	-9.93984	125882-66-8	Not Available	6.065	5.636	6.081	5.652	4.685	5.813	5.369	4.929	4.941	5.669	5.487	5.975	5.551	5.627	5.469	5.188	5.618	3.988	5.295	5.396	3.513	5.312	5.357
pos_2899	3alpha,15alpha-Diacetoxy-(22R)-hydroxylanosta-7,9(11),24-trien-26-oic acid	3α，15α-二乙酰氧基-（22R）-羟基羊毛甾-7,9（11），24-三烯-26-酸	metab_2527	B(ii)	-	-	HMDB0035605	M+NH4	C34H50O7	5.7454	-	-	pos	-	-	-	-	Lipids and lipid-like molecules	Prenol lipids	588.394	0.235608	0	61.3	7.50480572262035	-	Triterpenoids	5.213	5.306	5.157	5.315	5.072	5.172	4.719	5.229	5.158	5.133	5.142	5.13	5.088	5.176	5.108	5.073	5.152	5.305	3.75	4.863	4.97	5.097	5.07
pos_2907	Geranylacetone	香叶基丙酮	metab_2537	B(ii)	-	-	HMDB0031846	M+H-H2O	C13H22O	5.7667	-	C13297	pos	-	-	-	-	Lipids and lipid-like molecules	Prenol lipids	177.164	0.267654	0	53	-1.27579	3796-70-1	Monoterpenoids	3.393	3.584	2.172	2.442	3.561	3.344	2.943	3.379	2.155	3.497	3.97	3.553	3.409	3.518	3.008	3.249	3.939	2.543	2.676	2.877	3.146	3.439	2.226
pos_2927	5-Methyl-1H-Benzotriazole	5-甲基苯并三唑	metab_2559	B(i)	-	-	-	M+H	C7H7N3	5.7826	-	-	pos	-	-	-	-	-	-	134.071	0.0545976127669	64.9	0	-1.2345	-	-	4.046	4.049	4.052	4.033	4.08	4.065	4.055	4.003	4.087	4.055	4.037	4.021	4.024	4	4.038	4.025	4.021	4.012	4.172	4.049	4.042	4.009	4.01
pos_2963	13(S)-Hydroperoxylinolenic acid	13（S）-氢过氧亚油酸	metab_2599	B(ii)	map01100;map00592	Metabolic pathways;alpha-Linolenic acid metabolism	HMDB0301803	M+Na	C18H30O4	5.8038	代谢途径;α-亚麻酸代谢	C04785	pos	-	-	Metabolism;Metabolism	Global and overview maps;Lipid metabolism	Lipids and lipid-like molecules	Fatty Acyls	333.201	0.0456428593602	0	70.6	-7.63989	67597-26-6	Lineolic acids and derivatives	5.317	5.284	5.306	5.276	5.306	5.294	5.313	5.299	5.295	5.314	5.299	5.296	5.303	5.333	5.325	5.321	5.289	5.251	5.452	5.335	5.299	5.282	5.327
pos_3001	Bisacurone epoxide	甜没药姜黄酮环氧化物	metab_2643	B(ii)	-	-	HMDB0038503	M+NH4	C15H24O4	5.8366	-	-	pos	-	-	-	-	Lipids and lipid-like molecules	Prenol lipids	286.201	0.124293	0	40.9	-1.74729	127214-83-9	Sesquiterpenoids	4.776	4.596	4.845	4.676	4.906	4.793	4.829	5.046	4.741	4.36	4.899	4.994	5.049	4.803	4.896	4.829	4.996	5.005	4.674	5.122	4.911	5.138	4.769
pos_3047	PA(i-17:0/22:6(4Z,7Z,11E,13Z,15E,19Z)-2OH(10S,17))	-	metab_2693	B(ii)	-	-	HMDB0267914	2M+3H2O+2H	C42H71O10P	5.874	-	-	pos	-	-	-	-	Not Available	Not Available	780.493	0.0221006077878	0	33.1	3.87404202718141	-	Not Available	5.51	5.605	5.541	5.676	5.505	5.536	5.181	5.558	5.627	5.588	5.592	5.557	5.558	5.622	5.543	5.553	5.589	5.751	3.684	5.295	5.482	5.578	5.58
pos_3051	Milbemycin beta2	米尔贝霉素beta2	metab_2698	B(ii)	-	-	HMDB0254730;HMDB0254721;HMDB0254728;HMDB0242623	M+NH4	C33H50O7	5.8793	-	-	pos	-	-	-	-	Phenylpropanoids and polyketides	Macrolides and analogues	576.395	0.0331850499801	0	54.9	9.12450184050731	-	Milbemycins	5.268	5.343	5.129	5.385	5.346	5.307	5.205	5.298	5.341	5.352	5.277	5.378	5.323	5.317	5.3	5.237	5.384	5.23	5.262	5.18	5.275	5.275	5.342
pos_3062	Arginine ornithine	精氨酸鸟氨酸	metab_2710	B(ii)	-	-	HMDB0248583	M+H-H2O	C11H24N6O3	5.8899	-	-	pos	-	-	-	-	Organic acids and derivatives	Carboxylic acids and derivatives	271.187	0.0129520650829	0	35.3	-1.3573	-	Amino acids, peptides, and analogues	5.67	5.653	5.67	5.591	5.656	5.655	5.701	5.62	5.635	5.65	5.628	5.627	5.613	5.638	5.652	5.628	5.608	5.556	5.862	5.675	5.623	5.6	5.625
pos_3065	Stercobilin	尿胆素盐酸盐	metab_2713	B(i)	map00860	Porphyrin metabolism	HMDB0240259	M+H	C33H46N4O6	5.8899	卟啉代谢	C05793	pos	-	-	Metabolism	Metabolism of cofactors and vitamins	Organoheterocyclic compounds	Tetrapyrroles and derivatives	595.348	0.0229056	95.9	0	-1.23693	34217-90-8	Bilirubins	4.761	4.152	3.894	3.921	4.497	4.13	4.226	4.949	4.554	4.133	3.905	4.413	4.686	4.914	3.908	4.679	4.607	3.917	5.499	4.242	5.491	4.697	4.546
pos_3075	(11R,12S,13S)-Epoxy-hydroxyoctadeca-cis-9-cis-15-dien-1-oic acid	（11R，12S，13S）-环氧-羟基十八烷-顺式-9-顺式-15-二烯-1-酸	metab_2724	B(ii)	-	-	HMDB0302824	M+Na	C18H30O4	5.9005	-	-	pos	-	-	-	-	Lipids and lipid-like molecules	Fatty Acyls	333.201	0.0546099783386	0	59.3	-8.16783	-	Fatty acids and conjugates	4.948	4.901	4.948	4.843	4.877	4.926	4.988	4.923	4.929	4.912	4.883	4.912	4.9	5.017	4.944	4.924	4.91	4.852	5.143	4.986	4.937	4.911	4.895
pos_3078	PG(20:3(8Z,11Z,14Z)/PGF1alpha)	-	metab_2727	B(ii)	-	-	HMDB0269898	M+2H	C46H81O13P	5.9005	-	-	pos	-	-	-	-	Not Available	Not Available	437.281	0.0351265432843	0	41.8	6.07111358394257	-	Not Available	5.415	5.503	5.322	5.493	5.316	5.353	4.995	5.542	5.493	5.486	5.509	5.45	5.537	5.504	5.589	5.556	5.49	5.572	5.182	5.444	5.505	5.558	5.52
pos_3080	PA(PGF2alpha/a-25:0)	-	metab_2730	B(ii)	-	-	HMDB0267242	M+2Na	C48H89O11P	5.9005	-	-	pos	-	-	-	-	Not Available	Not Available	459.294	0.222284	0	37.9	-5.26931	-	Not Available	5.493	5.58	5.502	5.667	5.435	5.432	5.213	5.629	5.628	5.531	5.576	5.65	5.576	5.609	5.676	5.598	5.556	5.678	5.401	5.485	5.592	5.655	5.707
pos_31	Glycocholic Acid	甘氨胆酸	metab_2751	B(i)	map01100;map04979;map04976;map00120	Metabolic pathways;Cholesterol metabolism;Bile secretion;Primary bile acid biosynthesis	PW_C000089;HMDB0000331;LMST05030001;HMDB0000138;MJDBOTE0000466	M+H-2H2O, M+H, M+Na, M+H-H2O	C26H43NO6	6.1805	代谢途径;胆固醇代谢;胆汁分泌;初级胆汁酸生物合成	C01921	pos	Steroids	24-Carbon atoms	Metabolism;Organismal Systems;Organismal Systems;Metabolism	Global and overview maps;Digestive system;Digestive system;Lipid metabolism	Lipids and lipid-like molecules	Steroids and steroid derivatives	466.315	0.0793281	92.6	0	-2.02943	68753-51-5;475-31-0	Bile acids, alcohols and derivatives	6.111	6.031	6.583	5.756	6.177	6.224	6.773	6.573	6.645	6.125	6.235	6.263	6.597	6.372	6.435	6.492	5.941	6.144	6.514	5.853	6.722	6.383	6.31
pos_3125	Indolophenanthridine	-	metab_2779	B(ii)	-	-	HMDB0253475	M+NH4	C19H18N2	5.9271	-	-	pos	-	-	-	-	Organoheterocyclic compounds	Quinolines and derivatives	292.18	0.0834951981534	0	53.8	-2.02146	-	Benzoquinolines	4.063	3.817	3.797	4.218	5.096	4.479	3.916	3.74	4.092	3.595	3.716	3.356	3.861	3.329	3.413	3.193	3.813	3.305	4.773	4.132	3.96	4.13	3.597
pos_3126	Octanoylcarnitine	辛酰肉碱	metab_2780	B(ii)	-	-	LMFA07070095;HMDB0000791	M+Na	C15H29NO4	5.9271	-	C02838	pos	-	-	-	-	Lipids and lipid-like molecules	Fatty Acyls	310.201	0.0194016530963	0	44	7.07117884971378	25243-95-2	Fatty acid esters	4.923	4.949	5.058	5.12	4.936	5.02	4.905	5.116	5.184	4.592	4.955	4.999	5.272	5.047	5.105	4.87	5.106	4.969	5.142	5.27	5.079	5.206	5.073
pos_3132	Janthitrem F	-	metab_2787	B(ii)	-	-	HMDB0030530	M+H-2H2O	C39H51NO7	5.9324	-	-	pos	-	-	-	-	Organoheterocyclic compounds	Naphthopyrans	610.348	0.0502814446505	0	74.5	-7.18021	90986-52-0	Not Available	5.588	5.72	5.761	5.902	5.748	5.782	5.477	5.665	5.687	5.766	5.693	5.704	5.705	5.74	5.64	5.592	5.648	5.896	5.625	5.436	5.597	5.661	5.67
pos_3134	Methyl 2-amino-3-(4-chlorophenyl)propanoate	2-氨基-3-（4-氯苯基）丙酸甲酯	metab_2789	B(ii)	-	-	HMDB0254564	M+H-H2O	C10H12ClNO2	5.9376	-	-	pos	-	-	-	-	Organic acids and derivatives	Carboxylic acids and derivatives	196.052	0.0200390364628	0	65.4	-1.43988	-	Amino acids, peptides, and analogues	4.527	4.554	4.38	4.374	4.43	4.431	4.618	4.452	4.475	4.493	4.416	4.5	4.422	4.427	4.529	4.526	4.44	4.396	4.634	4.658	4.434	4.511	4.409
pos_3136	Fumigaclavine C	烟曲霉文丙	metab_2791	B(ii)	-	-	HMDB0252522	M+H-2H2O	C23H30N2O2	5.9376	-	C20438	pos	-	-	-	-	Alkaloids and derivatives	Ergoline and derivatives	331.216	0.0179875	0	46.6	-1.2451	-	Clavines and derivatives	5.139	5.064	5.088	4.962	5.062	5.075	5.226	5.048	5.025	5.044	4.966	5.071	5.091	5.077	5.112	5.051	5.031	4.838	5.448	5.207	5.06	5.048	5.139
pos_3139	Imetit	-	metab_2794	B(ii)	-	-	HMDB0253410	M+Na	C6H10N4S	5.9429	-	C17931	pos	-	-	-	-	Organoheterocyclic compounds	Azoles	193.052	0.00297977387655	0	50.4	3.2285169396802798	102203-18-9	Imidazoles	2.878	4.527	2.878	2.88	3.595	3.608	4.9	2.84	2.856	4.137	2.883	4.312	2.853	2.885	4.661	4.092	3.976	2.866	3.152	4.942	3.586	4.064	3.484
pos_3140	Lamivudine	拉米夫定	metab_2796	B(ii)	map04976	Bile secretion	PW_C009184;HMDB0251826;HMDB0014847;MJDBOTE0000876	M+H-H2O	C8H11N3O3S	5.9429	胆汁分泌	C07065	pos	-	-	Organismal Systems	Digestive system	Nucleosides, nucleotides, and analogues	Nucleoside and nucleotide analogues	212.047	0.0591209320084	0	54.6	-8.1894	134678-17-4	3''-thia pyrimidine nucleosides	3.942	5.257	3.678	3.469	4.538	4.471	5.602	3.654	3.387	4.959	3.534	5.098	3.554	4.004	5.389	4.86	4.746	3.058	4.092	5.636	4.49	4.864	4.356
pos_3145	Venlafaxine	文拉法辛	metab_2801	B(ii)	-	-	PW_C002364;HMDB0005016	M+ACN+Na	C17H27NO2	5.9429	-	C07187	pos	-	-	-	-	Benzenoids	Phenol ethers	341.222	0.0252574037241	0	47.9	6.54601593143507	93413-69-5	Anisoles	6.155	6.114	6.176	6.063	6.152	6.145	6.242	6.086	6.12	6.149	6.096	6.116	6.099	6.129	6.121	6.12	6.073	6.023	6.388	6.203	6.114	6.064	6.126
pos_3149	DG(16:0/0:0/PGE2)	-	metab_2805	B(ii)	-	-	HMDB0295449	M+2Na	C39H68O8	5.9482	-	-	pos	-	-	-	-	Not Available	Not Available	355.238	0.0499298918782	0	34.2	8.032152702428741	-	Not Available	5.619	5.619	5.565	5.636	5.565	5.596	5.328	5.656	5.574	5.645	5.719	5.64	5.69	5.666	5.641	5.665	5.618	5.715	4.171	5.544	5.619	5.651	5.699
pos_3211	4-Methyl-1H-Benzotriazole	4-甲基-1H-苯并三唑	metab_2875	B(i)	-	-	-	M+H	C7H7N3	5.9747	-	-	pos	-	-	-	-	-	-	134.071	0.0665550828928	87	0	-1.36647	-	-	4.591	4.563	4.555	4.547	4.616	4.573	4.603	4.529	4.61	4.588	4.517	4.539	4.531	4.541	4.586	4.563	4.538	4.515	4.734	4.599	4.539	4.551	4.578
pos_3385	6-Methylpteridine-2,4-diamine	6 -甲基蝶啶- 2，4 -二胺	metab_3066	B(ii)	-	-	HMDB0247090	M+H	C7H8N6	6.0276	-	-	pos	-	-	-	-	Organoheterocyclic compounds	Pteridines and derivatives	177.088	0.0336624476837	0	38	-1.74322	-	Not Available	4.754	4.657	4.789	4.581	4.742	4.703	4.738	4.702	4.718	4.712	4.72	4.75	4.732	4.756	4.78	4.802	4.628	4.701	5.278	4.857	4.726	4.747	4.709
pos_3396	Methyl (R)-9-hydroxy-10-undecene-5,7-diynoate glucoside	甲基（R）-9-羟基-10-十一烯-5,7-二炔酸葡萄糖苷	metab_3078	B(ii)	-	-	HMDB0040895	M+ACN+H	C18H24O8	6.0329	-	-	pos	-	-	-	-	Lipids and lipid-like molecules	Fatty Acyls	410.18	0.0351991006687	0	39.4	-2.23821	152141-44-1	Fatty acyl glycosides	5.716	5.622	5.558	5.337	5.541	5.566	5.44	4.862	5.311	5.612	5.56	4.836	5.323	5.11	5.083	5.636	4.972	5.018	5.823	5.142	5.27	5.226	5.41
pos_3482	Metazin	-	metab_3174	B(i)	-	-	-	M+H-H2O	C15H30N6O6	6.0698	-	-	pos	-	-	-	-	-	-	373.219	0.100273	33.3	0	-1.77803	-	-	5.002	4.927	5.056	4.904	4.962	4.938	5.094	4.878	4.822	4.932	4.923	4.844	4.971	4.962	4.843	5.047	4.86	4.959	5.651	5.021	4.901	4.847	4.792
pos_3498	N-Dodecylsarcosinate	N -十二烷基肌氨酸酯	metab_3191	B(ii)	-	-	HMDB0255129	M+CH3OH+H	C15H31NO2	6.075	-	-	pos	-	-	-	-	Organic acids and derivatives	Carboxylic acids and derivatives	290.268	0.0337597	0	60.9	-1.83317	-	Amino acids, peptides, and analogues	5.765	5.837	5.903	5.738	5.779	6.083	5.83	5.73	5.783	5.835	5.772	5.781	5.71	5.77	5.775	5.857	5.699	5.799	6.203	5.807	5.785	5.765	5.667
pos_3499	(12E)-10-Hydroxytetradec-12-enoylcarnitine	（12E）-10-羟基十四碳-12-烯酰基肉碱	metab_3192	B(ii)	-	-	HMDB0241362	M+H-H2O	C21H39NO5	6.075	-	-	pos	-	-	-	-	Lipids and lipid-like molecules	Fatty Acyls	368.279	0.0962495502179	0	50.1	-1.72583	-	Fatty acid esters	4.794	4.709	4.826	4.772	4.776	4.772	4.924	4.896	4.64	4.768	4.789	4.773	4.832	4.959	4.875	4.805	4.733	4.663	5.452	4.975	4.94	4.772	4.667
pos_3516	Heptadecanoic acid	十七烷酸	metab_3211	B(ii)	-	-	LMFA01010017;HMDB0006210;HMDB0006497;HMDB0002259	M+NH4	C17H34O2	6.0803	-	-	pos	-	-	-	-	Lipids and lipid-like molecules	Fatty Acyls	288.289	0.00496934993531	0	48.5	-1.83601	3546-17-6;506-12-7;106182-29-0	Fatty acid esters	5.733	5.717	5.788	5.646	5.72	5.745	5.776	5.679	5.742	5.729	5.713	5.703	5.686	5.713	5.725	5.737	5.656	5.637	6.225	5.767	5.705	5.706	5.659
pos_3611	3-Oxododecanoic acid	3 -氧代十二烷酸	metab_3317	B(ii)	-	-	HMDB0010727;PW_C006734	2M+NH4	C12H22O3	6.1067	-	C02367	pos	-	-	-	-	Organic acids and derivatives	Keto acids and derivatives	446.347	0.109835	0	33	-2.1018	-	Medium-chain keto acids and derivatives	4.597	4.733	4.829	4.729	4.64	4.624	4.728	4.583	4.345	4.512	4.822	4.629	4.696	4.759	4.697	4.862	4.687	4.663	5.444	4.81	4.687	4.597	4.657
pos_3651	Atractylenolide III	白术内酯Ⅲ	metab_3361	B(ii)	-	-	HMDB0248708;MJDBOTE0001286	M+NH4	C15H20O3	6.1172	-	C17887	pos	-	-	-	-	Lipids and lipid-like molecules	Prenol lipids	266.174	0.0213092167565	0	57.7	-2.3701	-	Terpene lactones	5.588	5.561	5.61	5.479	5.518	5.564	5.6	5.491	5.493	5.508	5.511	5.539	5.504	5.526	5.549	5.546	5.467	5.47	6.214	5.641	5.515	5.5	5.457
pos_3653	MG(0:0/20:4(8Z,11Z,14Z,17Z)/0:0)	-	metab_3363	B(ii)	-	-	HMDB0011549	M+NH4	C23H38O4	6.1172	-	-	pos	-	-	-	-	Lipids and lipid-like molecules	Endocannabinoids	396.309	0.113105	0	34.5	-4.37901	-	Not Available	4.797	4.667	4.799	4.752	4.66	4.669	4.766	5.016	4.471	4.678	4.819	4.721	4.785	4.785	4.821	4.712	4.689	4.559	5.586	4.975	4.963	4.632	4.55
pos_3689	Tetradecanoylcarnitine	十四烷酰基肉碱	metab_3402	B(i)	-	-	LMFA07070107;HMDB0254979;LMFA07070102;HMDB0005066	M+H	C21H41NO4	6.1278	-	-	pos	-	-	-	-	Lipids and lipid-like molecules	Fatty Acyls	372.31	0.0364616016862	73.8	0	-2.22909	25597-07-3	Fatty acid esters	5.536	5.578	5.663	5.469	5.458	5.535	5.708	5.747	5.524	5.605	5.607	5.613	5.55	5.597	5.63	5.651	5.714	5.498	6.2	5.819	5.456	5.71	5.471
pos_3733	16-Hydroxyhexadecanoylcarnitine	16 -羟基十六烷酰基肉碱	metab_3452	B(ii)	-	-	HMDB0241458	M+H-H2O	C23H45NO5	6.1436	-	-	pos	-	-	-	-	Lipids and lipid-like molecules	Fatty Acyls	398.326	0.115116	0	60.1	-1.85242	-	Fatty acid esters	5.348	5.407	5.415	5.325	5.422	5.303	5.574	5.497	5.427	5.16	5.447	5.455	5.243	5.095	5.226	5.579	5.344	5.259	5.936	5.611	5.264	5.453	5.24
pos_3736	Cholylvaline	-	metab_3455	B(ii)	-	-	HMDB0242380	2M+3H2O+2H	C29H49NO6	6.1436	-	-	pos	-	-	-	-	Lipids and lipid-like molecules	Steroids and steroid derivatives	521.366	0.00937725081538	0	32.7	-3.91293	-	Bile acids, alcohols and derivatives	6.996	7.011	6.955	7.01	6.993	7	6.963	6.972	6.962	7.032	6.991	7.034	6.99	7.006	7.01	6.98	6.979	6.961	5.219	6.95	6.973	6.949	7.03
pos_3750	LysoSM(d18:1)	-	metab_3470	B(ii)	map00600	Sphingolipid metabolism	HMDB0006482	M+H-H2O	C23H50N2O5P+	6.1489	鞘脂代谢	C03640	pos	-	-	Metabolism	Lipid metabolism	Lipids and lipid-like molecules	Sphingolipids	448.341	0.143773	0	43.7	-2.82658	1670-26-4	Phosphosphingolipids	5.108	5.027	4.958	4.787	4.786	5.091	5.094	5.121	4.52	5.279	5.192	4.899	4.943	4.929	5.048	5.066	4.997	4.78	5.876	5.243	5.085	5.052	5.121
pos_3761	CL(i-13:0/i-14:0/i-18:0/i-16:0)	-	metab_3482	B(ii)	map01100;map00564	Metabolic pathways;Glycerophospholipid metabolism	PW_C091127;HMDB0085509	M+H+Na	C70H136O17P2	6.1489	代谢途径;甘油磷脂代谢	C05980	pos	Lipids	Phospholipids	Metabolism;Metabolism	Global and overview maps;Lipid metabolism	Lipids and lipid-like molecules	Glycerophospholipids	667.461	0.0170277819355	0	30.6	-0.356681	-	Glycerophosphoglycerophosphoglycerols	7.356	7.367	7.309	7.392	7.348	7.341	7.311	7.336	7.35	7.379	7.342	7.386	7.346	7.367	7.358	7.299	7.346	7.312	5.064	7.282	7.33	7.308	7.377
pos_3774	Sulfadimidine	磺胺二甲嘧啶	metab_3496	B(i)	-	-	HMDB0015522	M+H	C12H14N4O2S	6.1594	-	C19530	pos	-	-	-	-	Benzenoids	Benzene and substituted derivatives	279.093	0.0427266814788	46.8	0	6.52437828629967	57-68-1	Benzenesulfonamides	5.426	5.403	5.462	5.327	5.356	5.374	5.486	5.307	5.391	5.379	5.429	5.339	5.391	5.381	5.445	5.409	5.275	5.341	5.994	5.46	5.428	5.332	5.371
pos_38	Dioctyl succinate	丁二酸二辛酯	metab_3524	B(i)	-	-	-	M+H, M+K, M+NH4, M+Na	C26H50O4	7.1375	-	-	pos	-	-	-	-	-	-	427.377	0.0163843719526	45.3	0	-1.89482	-	-	8.724	8.729	8.725	8.66	8.674	8.71	8.67	8.681	8.714	8.739	8.71	8.735	8.719	8.74	8.768	8.73	8.712	8.682	8.87	8.78	8.705	8.726	8.732
pos_3806	Sphinganine	二氢(神经)鞘氨醇	metab_3532	B(i)	map00600;map01100;map04071	Sphingolipid metabolism;Metabolic pathways;Sphingolipid signaling pathway	LMSP01020001;HMDB0242634;PW_C000184;HMDB0000269	M+H	C18H39NO2	6.1699	鞘脂代谢;代谢途径;鞘脂信号通路	C00836	pos	-	-	Metabolism;Metabolism;Environmental Information Processing	Lipid metabolism;Global and overview maps;Signal transduction	Organic nitrogen compounds	Organonitrogen compounds	302.305	0.0687379	97.1	0	-1.71037	764-22-7	Amines	5.186	4.81	4.685	5.219	4.842	4.939	4.834	4.694	5.222	5.069	4.894	4.719	4.699	5.156	4.775	4.983	4.988	4.332	5.452	5.151	4.823	4.427	5.196
pos_3826	Cyclosporin A	环胞霉素A	metab_3554	B(ii)	-	-	LMPK14000003;HMDB0250682	M+2H	C62H111N11O12	6.1752	-	C05086	pos	-	-	-	-	Organic acids and derivatives	Peptidomimetics	601.922	0.0249357971518	0	37.1	-9.81993	59865-13-3	Peptoid-peptide hybrids	7.012	7.035	6.963	7.033	6.999	7.026	6.956	7.004	7.003	7.062	7.007	7.026	7.014	7.012	7.026	6.978	7.003	6.982	3.986	6.966	6.985	6.992	7.034
pos_3835	1-Hexadecene	1-十六烯	metab_3564	B(ii)	-	-	HMDB0243889	M+NH4	C16H32	6.1805	-	-	pos	-	-	-	-	Hydrocarbons	Unsaturated hydrocarbons	242.284	0.103483	0	33.3	-1.61218	-	Unsaturated aliphatic hydrocarbons	5.276	5.228	5.376	5.25	5.291	5.465	5.321	5.286	5.249	5.226	5.166	5.247	5.171	5.193	5.288	5.261	5.161	5.212	5.56	5.255	5.241	5.162	5.184
pos_3840	PA(8:0/13:0)	-	metab_3570	B(ii)	map01100;map00564;map04070;map00561;map05212;map05200;map04975;map04024;map04072;map04912;map05231;map04666	Metabolic pathways;Glycerophospholipid metabolism;Phosphatidylinositol signaling system;Glycerolipid metabolism;Pancreatic cancer;Pathways in cancer;Fat digestion and absorption;cAMP signaling pathway;Phospholipase D signaling pathway;GnRH signaling pathway;Choline metabolism in cancer;Fc gamma R-mediated phagocytosis	PW_C062910;HMDB0115484	M+NH4	C24H47O8P	6.1805	代谢途径;甘油磷脂代谢;磷脂酰肌醇信号系统;甘油脂代谢;胰腺癌;癌症的发病通路;脂肪的消化和吸收;cAMP信号通路;磷脂酶D信号通路;GnRH信号通路;癌症的胆碱代谢;Fc-γR-介导的吞噬作用	C00416	pos	Lipids	Phospholipids	Metabolism;Metabolism;Environmental Information Processing;Metabolism;Human Diseases;Human Diseases;Organismal Systems;Environmental Information Processing;Environmental Information Processing;Organismal Systems;Human Diseases;Organismal Systems	Global and overview maps;Lipid metabolism;Signal transduction;Lipid metabolism;Cancer: specific types;Cancer: overview;Digestive system;Signal transduction;Signal transduction;Endocrine system;Cancer: overview;Immune system	Lipids and lipid-like molecules	Glycerophospholipids	512.334	0.0670944646256	0	57.3	-1.51236	-	Glycerophosphates	5.733	5.734	5.62	5.655	5.715	5.674	5.793	5.714	5.977	5.768	5.636	5.628	5.849	5.752	5.709	5.776	5.753	5.748	6.091	5.709	5.82	5.745	5.763
pos_3871	CL(18:1(9Z)/20:4(5Z,8Z,11Z,14Z)/16:1(9Z)/18:2(9Z,12Z))	CL（18:1（9Z）/20:4（5Z，8Z，11Z，14Z）/16:1（9Z）/18:2（9Z，12Z））	metab_3604	B(ii)	-	-	HMDB0111780	M+2H	C81H142O17P2	6.1963	-	-	pos	-	-	-	-	Lipids and lipid-like molecules	Glycerophospholipids	725.5	0.0114729	0	41.5	9.1770518716534	-	Glycerophosphoglycerophosphoglycerols	7.144	7.155	7.073	7.162	7.139	7.128	7.092	7.135	7.122	7.189	7.122	7.148	7.13	7.124	7.134	7.071	7.126	7.09	5.557	7.054	7.095	7.096	7.154
pos_3873	SM(d16:2(4E,8Z)/20:3(8Z,11Z,14Z)-2OH(5,6))	-	metab_3606	B(ii)	-	-	HMDB0290317	2M+3H2O+2H	C41H75N2O8P	6.1963	-	-	pos	-	-	-	-	Not Available	Not Available	768.531	0.0913836828269	0	36.5	-9.43057	-	Not Available	5.909	5.741	5.769	5.829	5.772	5.842	5.814	5.78	5.778	5.823	5.719	5.71	5.739	5.714	5.813	5.747	5.64	5.759	6.042	5.648	5.839	5.8	5.859
pos_3884	(+/-)-2,2,6-Trimethylcyclohexanone	-	metab_3618	B(ii)	-	-	HMDB0033794	M+NH4	C9H16O	6.2068	-	-	pos	-	-	-	-	Organic oxygen compounds	Organooxygen compounds	158.154	0.0226544186477	0	72.9	-1.76266	62861-88-5	Carbonyl compounds	5.24	5.242	5.313	5.204	5.233	5.232	5.263	5.206	5.245	5.196	5.225	5.185	5.197	5.205	5.251	5.22	5.184	5.174	5.531	5.261	5.229	5.194	5.205
pos_4020	2,6-Diamino-9-(2-hydroxyethoxymethyl)purine	2,6-二氨基-9-（2-羟基乙氧基甲基）嘌呤	metab_3771	B(ii)	-	-	HMDB0246998	M+H-H2O	C8H12N6O2	6.2542	-	-	pos	-	-	-	-	Organoheterocyclic compounds	Imidazopyrimidines	207.099	0.117659	0	66.8	-1.47993	-	Purines and purine derivatives	4.883	4.826	4.875	4.783	4.83	4.799	4.896	4.737	4.823	4.823	4.831	4.784	4.851	4.791	4.824	4.802	4.701	4.714	5.208	4.9	4.829	4.77	4.798
pos_4065	7,8-Dihydropteroic acid	7，8 -二氢蝶酸	metab_3819	B(ii)	map01100;map00790;map01240	Metabolic pathways;Folate biosynthesis;Biosynthesis of cofactors	HMDB0001412	M+H-2H2O	C14H14N6O3	6.2648	代谢途径;叶酸生物合成;辅助因子的生物合成	C00921	pos	-	-	Metabolism;Metabolism;Metabolism	Global and overview maps;Metabolism of cofactors and vitamins;Global and overview maps	Organoheterocyclic compounds	Pteridines and derivatives	279.101	0.117063	0	56.2	7.08205101310722	2134-76-1	Pterins and derivatives	5.044	5.064	5.092	4.999	5.067	5.102	5.143	4.995	5.062	5.056	5.043	5.019	5.027	5.03	5.078	5.047	5.018	5.05	5.333	5.094	4.993	5.036	5.023
pos_4078	2-(Methylthio)benzothiazole	-	metab_3833	B(i)	-	-	HMDB0303335	M+H	C8H7NS2	6.2701	-	C10910	pos	-	-	-	-	Organoheterocyclic compounds	Benzothiazoles	182.009	0.00872164487828	99.8	0	-1.51409	-	Not Available	5.503	5.474	5.519	5.451	5.453	5.499	5.474	5.449	5.459	5.447	5.426	5.451	5.424	5.401	5.465	5.41	5.417	5.417	5.595	5.448	5.409	5.43	5.413
pos_409	3-Methylcyclohexanethiol	3 -甲基环己硫醇	metab_3846	B(ii)	-	-	HMDB0031537	M+H, M+NH4	C7H14S	0.5131	-	-	pos	-	-	-	-	Organosulfur compounds	Thiols	148.116	0.00936140669809	0	47	3.5682074409220497	38699-50-2	Alkylthiols	4.555	4.484	4.467	4.647	4.463	4.54	4.427	4.462	4.689	4.627	4.678	4.587	4.57	4.534	4.573	4.443	4.493	4.522	4.676	4.387	4.544	4.609	4.508
pos_4099	Cholylcitrulline	胆酰瓜氨酸	metab_3856	B(ii)	-	-	HMDB0242383	M+Na	C30H51N3O7	6.2806	-	-	pos	-	-	-	-	Not Available	Not Available	588.365	0.123135	0	89.5	5.448358797562809	-	Not Available	5.677	5.451	5.24	5.056	4.373	5.31	5.667	4.854	5.048	5.888	5.738	5.692	4.893	5.669	5.259	5.537	5.82	4.218	5.71	5.514	4.608	5.063	5.298
pos_41	Digitoxigenin bisdigitoxide	洋地黄毒苷元双甲醚	metab_3857	B(ii)	-	-	HMDB0251275	M+2H, M+Na, M+NH4, M+H+Na	C35H54O10	4.9247	-	-	pos	-	-	-	-	Lipids and lipid-like molecules	Steroids and steroid derivatives	652.41	0.0276813278908	0	38.2	7.43872049661429	-	Steroid lactones	6.458	6.554	6.488	6.657	6.477	6.541	6.168	6.529	6.564	6.532	6.54	6.521	6.55	6.57	6.511	6.49	6.503	6.7	4.914	6.311	6.463	6.531	6.561
pos_410	L-Lysine	L-赖氨酸	metab_3858	B(i)	map01100;map00310;map02010;map01210;map00780;map00470;map01230;map04974;map00970	Metabolic pathways;Lysine degradation;ABC transporters;2-Oxocarboxylic acid metabolism;Biotin metabolism;D-Amino acid metabolism;Biosynthesis of amino acids;Protein digestion and absorption;Aminoacyl-tRNA biosynthesis	HMDB0301757;HMDB0000182;PW_C000118;MJDBOTE0000528	M+H-H2O, M+H	C6H14N2O2	0.5184	代谢途径;赖氨酸降解;ABC转运器;2-氧代羧酸代谢;生物素代谢;D-氨基酸代谢;氨基酸生物合成;蛋白质的消化和吸收;氨酰基tRNA生物合成	C00047	pos	Peptides	Amino acids	Metabolism;Metabolism;Environmental Information Processing;Metabolism;Metabolism;Metabolism;Metabolism;Organismal Systems;Genetic Information Processing	Global and overview maps;Amino acid metabolism;Membrane transport;Global and overview maps;Metabolism of cofactors and vitamins;Metabolism of other amino acids;Global and overview maps;Digestive system;Translation	Organic acids and derivatives	Carboxylic acids and derivatives	147.113	0.0231608664227	98.5	0	-1.99378	56-87-1;10098-89-2	Amino acids, peptides, and analogues	5.543	5.502	5.487	5.629	5.455	5.528	5.451	5.507	5.703	5.595	5.677	5.594	5.586	5.536	5.566	5.488	5.538	5.534	5.688	5.424	5.549	5.613	5.554
pos_4174	CL(i-12:0/i-13:0/i-24:0/i-17:0)	-	metab_3940	B(ii)	map01100;map00564	Metabolic pathways;Glycerophospholipid metabolism	HMDB0087048;PW_C085085	M+H+Na	C75H146O17P2	6.3018	代谢途径;甘油磷脂代谢	C05980	pos	Lipids	Phospholipids	Metabolism;Metabolism	Global and overview maps;Lipid metabolism	Lipids and lipid-like molecules	Glycerophospholipids	702.497	0.0486967662529	0	68.8	-4.02338	-	Glycerophosphoglycerophosphoglycerols	6.181	6.21	6.012	6.256	6.166	6.166	6.04	6.142	6.155	6.221	6.134	6.243	6.158	6.154	6.126	6.066	6.203	6.105	6.145	6.084	6.127	6.176	6.199
pos_4180	6-Dimethylaminopurine	6-二甲基氨基嘌呤	metab_3947	B(ii)	-	-	HMDB0000473	M+NH4	C7H9N5	6.307	-	-	pos	-	-	-	-	Organoheterocyclic compounds	Imidazopyrimidines	181.119	0.0637268868132	0	57.9	-1.87171	938-55-6	Purines and purine derivatives	4.69	4.682	4.742	4.658	4.674	4.717	4.744	4.689	4.725	4.694	4.653	4.648	4.692	4.655	4.687	4.675	4.651	4.638	5.008	4.765	4.689	4.667	4.65
pos_4181	N,N-Didesmethyltramadol	-	metab_3948	B(ii)	-	-	PW_C040584;HMDB0060849	M+ACN+Na	C14H21NO2	6.307	-	-	pos	-	-	-	-	Benzenoids	Phenol ethers	299.175	0.125588	0	32.1	6.95189925426394	931115-27-4	Anisoles	4.768	4.775	4.74	4.63	4.661	4.772	4.746	4.676	4.757	4.747	4.777	4.683	4.841	4.746	4.75	4.823	4.68	4.696	4.951	4.835	4.736	4.731	4.683
pos_42	2a-Hydroxygypsogenin 3-O-b-D-glucoside	2A -羟基绞股蓝皂苷3 - O - B - D -葡萄糖苷	metab_3968	B(ii)	-	-	HMDB0041132	M+2H, M+H, M+NH4, M+H+Na	C36H56O10	5.2868	-	-	pos	-	-	-	-	Lipids and lipid-like molecules	Prenol lipids	666.427	0.0389486874251	0	50.8	8.6958261721178	-	Terpene glycosides	5.575	5.666	5.579	5.785	5.553	5.641	5.229	5.649	5.649	5.626	5.623	5.603	5.628	5.664	5.616	5.577	5.621	5.843	5.416	5.382	5.574	5.621	5.652
pos_4284	Dibutylamine	二丁胺	metab_4062	B(ii)	-	-	HMDB0251174;HMDB0031217	M+H	C8H19N	6.339	-	C00849	pos	-	-	-	-	Organic nitrogen compounds	Organonitrogen compounds	130.159	0.0189339339283	0	35.5	-1.4084	141-78-6	Amines	5.219	5.215	5.236	5.171	5.211	5.218	5.254	5.165	5.234	5.207	5.181	5.21	5.2	5.192	5.199	5.206	5.17	5.158	5.499	5.248	5.203	5.151	5.184
pos_431	Isobutylidene	亚异丁基	metab_4091	B(ii)	-	-	HMDB0302266	M+H-H2O, M+H	C6H14N4O2	0.6138	-	-	pos	-	-	-	-	Organic acids and derivatives	Organic carbonic acids and derivatives	175.119	0.00504626306595	0	50.5	-2.00971	-	Ureas	5.535	5.863	5.686	5.882	5.882	5.806	5.28	5.844	5.983	5.936	5.962	5.909	5.962	5.898	5.659	5.92	5.776	5.916	5.993	5.874	5.923	5.928	5.951
pos_4320	Cyclohexane	环己烷	metab_4103	B(ii)	-	-	HMDB0029597	M+NH4	C6H12	6.3548	-	C11249	pos	-	-	-	-	Hydrocarbons	Saturated hydrocarbons	102.128	0.0128999017088	0	43.9	-2.03447	110-82-7	Cycloalkanes	7.042	7.032	7.059	6.994	7.022	7.036	7.057	6.991	7.029	7.023	7.009	7.015	7.013	7.018	7.031	7.022	6.998	6.981	7.269	7.053	7.008	6.993	7.012
pos_4322	Leupeptin	亮抑酶肽	metab_4105	B(ii)	-	-	HMDB0254042	M+CH3OH+H	C20H38N6O4	6.3548	-	C01591	pos	-	-	-	-	Organic acids and derivatives	Carboxylic acids and derivatives	459.328	0.0311788401954	0	30.9	-1.94676	24365-47-7	Amino acids, peptides, and analogues	5.807	5.737	5.794	5.724	5.703	5.726	5.795	5.694	5.733	5.727	5.707	5.726	5.732	5.708	5.72	5.718	5.736	5.676	5.987	5.783	5.725	5.718	5.7
pos_4357	SM(d17:1/PGF1alpha)	-	metab_4143	B(ii)	-	-	HMDB0290396	M+Na	C42H81N2O9P	6.3707	-	-	pos	-	-	-	-	Not Available	Not Available	811.559	0.0352018250077	0	75.3	2.2569701660860098	-	Not Available	5.939	5.951	5.943	5.878	5.937	5.884	6.063	5.901	5.933	5.945	5.935	5.907	5.95	5.948	5.935	5.98	5.873	5.835	6.211	6.056	5.892	5.89	5.856
pos_4461	Cholylhistidine	胆碱组氨酸	metab_4259	B(ii)	-	-	HMDB0242389	M+H	C30H47N3O6	6.4608	-	-	pos	-	-	-	-	Lipids and lipid-like molecules	Steroids and steroid derivatives	546.355	0.0147756507604	0	74.9	1.54659425632961	-	Bile acids, alcohols and derivatives	6.963	6.76	6.739	6.734	6.999	6.86	7.04	6.717	6.58	6.862	6.776	6.878	6.779	6.764	6.826	7.058	6.727	6.82	6.976	6.844	6.754	6.696	6.819
pos_4504	Choline Phosphate	磷酸胆碱	metab_4307	B(i)	map01100;map00564;map05231	Metabolic pathways;Glycerophospholipid metabolism;Choline metabolism in cancer	HMDB0001565	M+H	C5H14NO4P	6.482	代谢途径;甘油磷脂代谢;癌症的胆碱代谢	C00588	pos	-	-	Metabolism;Metabolism;Human Diseases	Global and overview maps;Lipid metabolism;Cancer: overview	Organic nitrogen compounds	Organonitrogen compounds	184.073	0.0288634708308	53.5	0	-1.77641	107-73-3;3616-04-4	Quaternary ammonium salts	4.621	4.639	4.624	4.577	4.642	4.607	4.678	4.502	4.611	4.641	4.596	4.592	4.605	4.71	4.604	4.624	4.537	4.552	4.833	4.612	4.587	4.535	4.652
pos_4505	Octaethyleneglycol monododecyl ether	十八烷基乙二醇单十二烷基醚	metab_4308	B(ii)	-	-	HMDB0246126	M+NH4	C28H58O9	6.482	-	-	pos	-	-	-	-	Organic oxygen compounds	Organooxygen compounds	556.441	0.0152196391811	0	53.9	-1.96746	-	Ethers	5.373	5.325	5.306	5.576	5.297	5.443	5.719	5.245	5.225	5.225	5.194	5.274	5.302	5.266	5.25	5.27	5.264	5.14	5.464	5.369	5.266	5.237	5.303
pos_4527	5-Oxoicosa-3,6,8-trienoic acid	5-氧二十碳-3，6，8-三烯酸	metab_4331	B(ii)	-	-	HMDB0260375	2M+NH4	C20H32O3	6.4927	-	-	pos	-	-	-	-	Lipids and lipid-like molecules	Fatty Acyls	658.509	0.0611734993621	0	47.2	7.92520002929736	-	Fatty acids and conjugates	5.417	5.484	5.402	5.331	5.379	5.443	5.48	5.368	5.397	5.358	5.383	5.407	5.467	5.334	5.475	5.449	5.404	5.367	5.546	5.49	5.442	5.436	5.41
pos_4531	Mifepristone	米非司酮	metab_4336	B(ii)	-	-	HMDB0014972;MJDBOTE0001512	M+CH3OH+H	C29H35NO2	6.498	-	C07652	pos	-	-	-	-	Lipids and lipid-like molecules	Steroids and steroid derivatives	462.297	0.0671679684798	0	52.3	-8.52631	84371-65-3	Oxosteroids	5.196	5.135	5.152	5.118	4.971	5.134	5.259	4.822	5.112	5.32	5.162	5.267	5.152	5.205	5.208	5.09	5.271	4.946	5.144	5.197	4.998	5.235	5.056
pos_4539	1-Nonadecanoyl-glycero-3-phosphoethanolamine	1 -十九烷酰基-丙三基3 -磷酸乙醇胺	metab_4344	B(ii)	-	-	LMGP02050028;HMDB0243971	M+H-H2O	C24H50NO7P	6.5089	-	-	pos	-	-	-	-	Lipids and lipid-like molecules	Glycerophospholipids	478.328	0.0318375980758	0	69.6	-2.33039	-	Glycerophosphoethanolamines	5.55	5.502	5.523	5.495	5.49	5.522	5.49	5.406	5.481	5.544	5.488	5.493	5.534	5.589	5.497	5.494	5.438	5.426	5.682	5.475	5.522	5.405	5.558
pos_4541	Deoxycholylarginine	脱氧胆酰精氨酸	metab_4347	B(ii)	-	-	HMDB0242418	M+H-H2O	C30H52N4O5	6.5143	-	-	pos	-	-	-	-	Not Available	Not Available	531.386	0.0198779339601	0	55.8	-8.75982	-	Not Available	5.681	5.667	5.66	5.629	5.673	5.66	5.674	5.65	5.683	5.614	5.627	5.672	5.715	5.598	5.687	5.691	5.66	5.652	5.811	5.731	5.682	5.682	5.624
pos_4542	6-Keto-prostaglandin F1a	6-酮前列腺素	metab_4348	B(ii)	map00590;map01100	Arachidonic acid metabolism;Metabolic pathways	PW_C001726;HMDB0002886	2M+H	C20H34O6	6.5196	花生四烯酸代谢;代谢途径	C05961	pos	-	-	Metabolism;Metabolism	Lipid metabolism;Global and overview maps	Lipids and lipid-like molecules	Fatty Acyls	741.472	0.123866	0	34.3	-8.78369	58962-34-8	Eicosanoids	4.959	4.72	4.997	5.016	4.847	4.989	4.926	5.023	5.031	4.916	4.936	4.932	5.013	4.915	4.964	4.954	4.95	4.964	5.123	4.974	4.913	4.929	4.904
pos_4547	PC(18:1/0:0)	-	metab_4353	B(i)	-	-	LMGP01050029;LMGP01050030;LMGP01050032	M+H	C26H52NO7P	6.5302	-	-	pos	-	-	-	-	-	-	522.354	0.00745310675817	87.8	0	-1.78487	-	-	7.567	7.433	7.459	7.476	7.582	7.525	7.665	7.373	7.424	7.49	7.523	7.525	7.462	7.459	7.434	7.576	7.394	7.432	7.621	7.487	7.43	7.334	7.509
pos_455	Norvaline	正缬氨酸	metab_4356	B(i)	-	-	HMDB0013716;MJDBOTE0000679	M+K, 2M+H	C5H11NO2	0.6191	-	C01799	pos	-	-	-	-	Organic acids and derivatives	Carboxylic acids and derivatives	235.165	0.0431131674353	30.7	0	-1.31569	760-78-1	Amino acids, peptides, and analogues	4.976	4.99	5.079	5.13	5.052	5.046	5.1	5.052	4.962	5.163	5.061	4.947	5.114	5.054	4.966	4.979	4.848	5.067	5.251	4.878	5.115	4.918	5.035
pos_4628	Prostaglandin E2 ethanolamide	前列腺素E2乙醇酰胺	metab_4443	B(ii)	-	-	HMDB0013038	2M+Na	C22H37NO5	6.5834	-	-	pos	-	-	-	-	Lipids and lipid-like molecules	Fatty Acyls	813.528	0.0772614924554	0	32	5.87095792148952	-	Eicosanoids	5.608	5.612	5.652	5.608	5.55	5.592	5.706	5.571	5.648	5.585	5.556	5.601	5.598	5.613	5.636	5.674	5.575	5.505	5.906	5.707	5.624	5.632	5.596
pos_4676	Lyso-PAF C-16	-	metab_4496	B(i)	-	-	-	M+H	C24H52NO6P	6.6258	-	-	pos	-	-	-	-	-	-	482.36	0.0299592218584	34.8	0	-2.02802	-	-	6.595	6.57	6.562	6.442	6.467	6.545	6.473	6.422	6.514	6.599	6.478	6.514	6.499	6.631	6.501	6.521	6.466	6.324	6.785	6.467	6.489	6.358	6.656
pos_4682	(3beta,5alpha,6beta,22E,24R)-23-Methylergosta-7,22-diene-3,5,6-triol	（3beta，5alpha，6beta，22E，24R）-23-甲基麦角甾-7,22-二烯-3,5,6-三醇	metab_4503	B(ii)	-	-	HMDB0033633	M+ACN+Na	C29H48O3	6.6311	-	-	pos	-	-	-	-	Lipids and lipid-like molecules	Steroids and steroid derivatives	508.375	0.0398625230427	0	45.9	-1.69895	243449-54-9	Ergostane steroids	6.516	6.461	6.432	6.318	6.305	6.417	6.426	6.253	6.427	6.519	6.439	6.414	6.319	6.51	6.394	6.445	6.394	6.212	6.706	6.371	6.354	6.271	6.533
pos_4689	PC(O-16:0/0:0)	-	metab_4510	B(i)	-	-	LMGP01060010	M+Na	C24H52NO6P	6.6364	-	-	pos	-	-	-	-	-	-	504.341	0.0789125962963	93.8	0	-3.35816	-	-	5.272	5.267	5.187	5.101	5.109	5.196	5.165	5.05	5.162	5.194	5.087	5.104	5.169	5.243	5.198	5.188	5.124	5.04	5.423	5.126	5.133	5.039	5.324
pos_4695	LysoPC(20:1(11Z)/0:0)	-	metab_4517	B(ii)	map00564;map05231	Glycerophospholipid metabolism;Choline metabolism in cancer	HMDB0010391	M+H	C28H56NO7P	6.6471	甘油磷脂代谢;癌症的胆碱代谢	C04230	pos	Lipids	Phospholipids	Metabolism;Human Diseases	Lipid metabolism;Cancer: overview	Lipids and lipid-like molecules	Glycerophospholipids	550.386	0.00553793741898	0	88.3	-1.71392	-	Glycerophosphocholines	6.558	6.388	6.454	6.415	6.482	6.487	6.52	6.329	6.476	6.524	6.496	6.549	6.567	6.631	6.522	6.555	6.377	6.474	6.738	6.551	6.538	6.335	6.428
pos_4720	PC(22:6(4Z,7Z,10Z,13Z,16Z,19Z)/P-16:0)	-	metab_4546	B(ii)	map01100;map00564;map00590;map00591;map00592;map05231;map04723	Metabolic pathways;Glycerophospholipid metabolism;Arachidonic acid metabolism;Linoleic acid metabolism;alpha-Linolenic acid metabolism;Choline metabolism in cancer;Retrograde endocannabinoid signaling	HMDB0008751	M+H	C46H80NO7P	6.6952	代谢途径;甘油磷脂代谢;花生四烯酸代谢;亚油酸代谢;α-亚麻酸代谢;癌症的胆碱代谢;逆行内源性大麻素信号传导	C00157	pos	Lipids	Phospholipids	Metabolism;Metabolism;Metabolism;Metabolism;Metabolism;Human Diseases;Organismal Systems	Global and overview maps;Lipid metabolism;Lipid metabolism;Lipid metabolism;Lipid metabolism;Cancer: overview;Nervous system	Lipids and lipid-like molecules	Glycerophospholipids	790.572	0.288991	0	89.6	-3.49248	-	Glycerophosphocholines	5.977	6.076	6.039	5.906	6.004	5.987	5.999	5.808	6.05	5.975	5.971	5.932	6.009	5.979	5.995	6.003	5.958	6.022	6.013	6.11	5.76	5.988	5.695
pos_4748	Cyanidin 3,5-O-diglucoside	矢车菊素- 3，5 - O -二葡萄糖苷	metab_4576	B(ii)	-	-	HMDB0304306;HMDB0304659	M+H	C42H80NO7P	6.7271	-	C08639	pos	-	-	-	-	Phenylpropanoids and polyketides	Flavonoids	742.573	0.0321927094038	0	48.5	-2.37335	20905-74-2	Flavonoid glycosides	5.728	5.766	5.875	5.621	5.581	5.539	5.649	5.645	5.707	5.742	5.875	5.711	5.741	5.379	5.678	5.688	5.74	5.576	5.712	5.904	5.652	5.641	5.344
pos_4782	PC(18:0/20:4(8Z,11Z,14Z,17Z))	-	metab_4614	B(ii)	map01100;map00564;map00590;map00591;map00592;map05231;map04723	Metabolic pathways;Glycerophospholipid metabolism;Arachidonic acid metabolism;Linoleic acid metabolism;alpha-Linolenic acid metabolism;Choline metabolism in cancer;Retrograde endocannabinoid signaling	LMGP01012144;PW_C004098;HMDB0008049	M+H	C46H84NO8P	6.7911	代谢途径;甘油磷脂代谢;花生四烯酸代谢;亚油酸代谢;α-亚麻酸代谢;癌症的胆碱代谢;逆行内源性大麻素信号传导	C00157	pos	Lipids	Phospholipids	Metabolism;Metabolism;Metabolism;Metabolism;Metabolism;Human Diseases;Organismal Systems	Global and overview maps;Lipid metabolism;Lipid metabolism;Lipid metabolism;Lipid metabolism;Cancer: overview;Nervous system	Lipids and lipid-like molecules	Glycerophospholipids	810.599	0.177798	0	72.6	-2.60714	-	Glycerophosphocholines	8.627	8.626	8.651	8.672	8.699	8.654	8.703	8.646	8.659	8.653	8.564	8.636	8.595	8.661	8.627	8.629	8.582	8.588	8.789	8.571	8.573	8.638	8.661
pos_479	1-(Hydroxymethyl)-5,5-dimethyl-2,4-imidazolidinedione	1-（羟甲基）-5,5-二甲基-2,4-咪唑烷二酮	metab_4622	B(ii)	-	-	HMDB0031670	M+H, M+NH4	C6H10N2O3	0.6297	-	-	pos	-	-	-	-	Organoheterocyclic compounds	Azolidines	159.076	0.0119653167171	0	58.1	-1.59362	116-25-6	Imidazolidines	5.426	5.393	5.403	5.443	5.468	5.436	5.487	5.334	5.495	5.441	5.46	5.489	5.448	5.467	5.536	5.444	5.358	5.392	5.578	5.372	5.432	5.381	5.447
pos_4799	Quinacrine	奎纳克林	metab_4632	B(ii)	-	-	HMDB0015235	M+ACN+H	C23H30ClN3O	6.8238	-	C07339	pos	-	-	-	-	Organoheterocyclic compounds	Quinolines and derivatives	441.242	0.24941	0	39.1	2.11238318782099	83-89-6	Benzoquinolines	5.236	5.227	5.247	5.128	5.048	5.176	5.224	4.929	5.074	5.164	5.226	5.1	5.187	5.108	5.118	5.18	5.146	5.11	5.38	5.364	5.209	5.086	5.042
pos_4800	Filipin II	菲利平Ⅱ	metab_4635	B(ii)	-	-	HMDB0252258;HMDB0242297	M+H	C35H58O10	6.8238	-	-	pos	-	-	-	-	Phenylpropanoids and polyketides	Macrolides and analogues	639.406	0.0889452561738	0	47.7	-6.63733	-	Not Available	5.8	5.788	5.817	5.732	5.708	5.722	5.808	5.561	5.71	5.788	5.782	5.682	5.725	5.726	5.704	5.806	5.738	5.698	5.916	5.867	5.75	5.661	5.644
pos_4803	Triethylene glycol monohexyl ether	三甘醇单己基醚	metab_4638	B(ii)	-	-	HMDB0259194	2M+K	C12H26O4	6.829	-	-	pos	-	-	-	-	Organic oxygen compounds	Organooxygen compounds	507.328	0.150721	0	33.1	-2.42668	-	Ethers	5.569	5.587	5.59	5.485	5.488	5.519	5.603	5.334	5.458	5.537	5.553	5.475	5.515	5.496	5.492	5.577	5.526	5.51	5.668	5.649	5.515	5.422	5.383
pos_4831	Nordihydrocapsaicin	降二氢辣椒碱	metab_4669	B(ii)	-	-	LMFA08020319;HMDB0036328	2M+NH4	C17H27NO3	6.8716	-	C20216	pos	-	-	-	-	Benzenoids	Phenols	604.433	0.0353517576455	0	56	2.12785014316284	28789-35-7	Methoxyphenols	5.657	5.404	5.542	5.405	5.268	5.466	5.514	5.306	5.23	5.555	5.542	5.425	5.379	5.598	5.369	5.545	5.289	5.335	5.743	5.413	5.576	5.269	5.421
pos_4834	Tetradecanol	十四醇	metab_4672	B(ii)	-	-	HMDB0011638	M+ACN+H	C14H30O	6.8769	-	-	pos	-	-	-	-	Lipids and lipid-like molecules	Fatty Acyls	256.263	0.0201665649214	0	45.9	-1.8329	112-72-1	Fatty alcohols	5.598	5.621	5.659	5.614	5.606	5.666	5.661	5.44	5.555	5.584	5.326	5.583	5.613	5.407	5.497	5.548	5.409	5.564	5.669	5.537	5.529	5.56	5.537
pos_4840	PC(16:0/18:1(11Z))	-	metab_4678	B(ii)	map01100;map00564;map00590;map00591;map00592;map05231;map04723	Metabolic pathways;Glycerophospholipid metabolism;Arachidonic acid metabolism;Linoleic acid metabolism;alpha-Linolenic acid metabolism;Choline metabolism in cancer;Retrograde endocannabinoid signaling	HMDB0007971;PW_C004020;LMGP01010576	M+H	C42H82NO8P	6.8875	代谢途径;甘油磷脂代谢;花生四烯酸代谢;亚油酸代谢;α-亚麻酸代谢;癌症的胆碱代谢;逆行内源性大麻素信号传导	C00157	pos	Lipids	Phospholipids	Metabolism;Metabolism;Metabolism;Metabolism;Metabolism;Human Diseases;Organismal Systems	Global and overview maps;Lipid metabolism;Lipid metabolism;Lipid metabolism;Lipid metabolism;Cancer: overview;Nervous system	Lipids and lipid-like molecules	Glycerophospholipids	760.583	0.123893	0	69.2	-2.43509	-	Glycerophosphocholines	8.064	8.036	8.085	7.925	8.057	8.09	8.062	8.164	8.033	8.1	8.014	8.026	8.001	7.964	8.061	7.944	8.053	7.944	8.209	8.027	8.025	7.947	7.955
pos_4841	Solasodine	澳洲茄胺	metab_4679	B(ii)	-	-	LMST01150004;HMDB0035282	M+Na	C27H43NO2	6.8928	-	C10822	pos	-	-	-	-	Lipids and lipid-like molecules	Steroids and steroid derivatives	436.32	0.0955939436145	0	61.1	4.19726557377066	126-17-0	Steroidal alkaloids	4.564	4.365	4.521	4.3	4.409	4.433	4.491	4.394	4.227	4.662	4.584	4.319	4.467	4.916	4.271	4.452	4.207	4.223	4.978	4.35	4.387	4.169	4.368
pos_4847	(20R,22R)-20,22-dihydroxycholesterol	（20R，22R）-20,22-二羟基胆固醇	metab_4685	B(i)	map01100;map00140	Metabolic pathways;Steroid hormone biosynthesis	LMST01010200	M+H-H2O	C27H46O3	6.9088	代谢途径;类固醇激素生物合成	C05501	pos	-	-	Metabolism;Metabolism	Global and overview maps;Lipid metabolism	-	-	401.341	0.0937151557675	82.3	0	-1.767	-	-	4.402	4.673	4.709	4.179	3.877	4.495	4.716	3.842	3.769	4.853	4.418	4.315	4.226	4.644	4.306	4.334	4.468	4.318	4.832	4.639	4.834	4.043	4.367
pos_4882	Bactenecin	牛溶菌肽	metab_4721	B(ii)	-	-	HMDB0248843	M+2H	C63H118N24O13S2	6.9993	-	-	pos	-	-	-	-	Organic Polymers	Polypeptides	742.439	0.0729418192952	0	45.3	-7.95527	-	Not Available	5.946	6.044	6.058	6.132	6.007	6.04	5.284	5.884	5.908	6.081	6.002	5.971	5.955	6.049	6.014	5.878	5.93	5.991	2.845	5.763	5.832	5.954	6.108
pos_4884	PC(22:6(4Z,7Z,10Z,13Z,16Z,19Z)/20:4(5Z,8Z,11Z,14Z))	-	metab_4723	B(ii)	map01100;map00564;map00590;map00591;map00592;map05231;map04723	Metabolic pathways;Glycerophospholipid metabolism;Arachidonic acid metabolism;Linoleic acid metabolism;alpha-Linolenic acid metabolism;Choline metabolism in cancer;Retrograde endocannabinoid signaling	HMDB0008739;LMGP01012119;PW_C004787	M+H	C50H80NO8P	7.0046	代谢途径;甘油磷脂代谢;花生四烯酸代谢;亚油酸代谢;α-亚麻酸代谢;癌症的胆碱代谢;逆行内源性大麻素信号传导	C00157	pos	Lipids	Phospholipids	Metabolism;Metabolism;Metabolism;Metabolism;Metabolism;Human Diseases;Organismal Systems	Global and overview maps;Lipid metabolism;Lipid metabolism;Lipid metabolism;Lipid metabolism;Cancer: overview;Nervous system	Lipids and lipid-like molecules	Glycerophospholipids	854.569	0.202544	0	85.8	-1.06157	-	Glycerophosphocholines	5.627	5.473	5.456	5.645	5.784	5.621	5.996	5.5	5.515	5.611	5.581	5.572	5.502	5.429	5.388	5.572	5.409	5.407	5.787	5.347	5.668	5.614	5.661
pos_4902	Latrunculin B	红海海绵素B	metab_4743	B(ii)	-	-	HMDB0253990	M+NH4	C20H29NO5S	7.0313	-	C19904	pos	-	-	-	-	Phenylpropanoids and polyketides	Macrolides and analogues	413.211	0.23222	0	35.9	2.01463770433402	76343-94-7	Not Available	4.96	4.876	4.984	4.874	4.839	4.994	4.951	4.762	4.791	4.986	4.786	4.837	4.959	4.891	4.892	4.851	4.844	4.85	5.119	4.968	4.883	4.805	4.934
pos_491	Isovalerylglutamic acid	异戊酰谷氨酸	metab_4751	B(ii)	-	-	HMDB0000726	M+H-H2O, M+H	C10H17NO5	4.2095	-	-	pos	-	-	-	-	Organic acids and derivatives	Carboxylic acids and derivatives	232.118	0.251613	0	30.7	-1.34771	80154-63-8	Amino acids, peptides, and analogues	3.962	3.66	3.669	3.615	3.987	3.86	3.638	3.79	3.71	3.852	3.863	3.901	3.788	3.883	4.112	3.849	3.841	3.934	4.429	3.895	4.299	3.748	4.061
pos_4915	N6-Methyl-2'-deoxyadenosine	N6 -甲基- 2 ' -脱氧腺苷	metab_4757	B(ii)	-	-	HMDB0255300	M+NH4	C11H15N5O3	7.0525	-	C03795	pos	-	-	-	-	Nucleosides, nucleotides, and analogues	Purine nucleosides	283.151	0.0108706311002	0	53.3	-1.68976	2002-35-9	Purine 2''-deoxyribonucleosides	6.053	6.041	6.052	5.988	5.99	6.024	6.057	5.985	6.018	6.037	6.013	6.015	6.025	6.021	6.053	6.033	6.002	5.987	6.188	6.059	6.019	5.985	6.007
pos_492	5,6-Methylenedioxy-2-aminoindane	5，6 -亚甲二氧基- 2 -氨基茚满	metab_4762	B(ii)	-	-	HMDB0244545	M+H-H2O, M+ACN+H	C10H11NO2	4.1883	-	-	pos	-	-	-	-	Organoheterocyclic compounds	Benzodioxoles	219.113	0.0273112923756	0	32.9	-1.69579	-	Not Available	4.933	5.251	5.412	4.872	4.874	5.148	5.017	4.876	4.945	5.511	5.138	5.251	4.807	5.302	5.188	4.899	4.962	4.516	5.593	4.943	4.675	4.762	5.229
pos_4928	DG(18:1(9Z)/18:2(9Z,12Z)/0:0)	-	metab_4771	B(ii)	map05214;map05167;map05143;map05163;map05146;map04915;map04015;map04014;map04659;map04658;map04270;map04012;map05231;map04650;map04370;map04371;map04072;map04071;map05235;map04921;map05415;map04750;map04919;map04933;map04961;map05012;map04920;map04923;map04925;map05017;map04926;map05171;map04726;map04725;map04724;map04723;map04728;map05223;map04720;map04666;map05170;map04664;map04540;map04662;map…	Glioma;Kaposi sarcoma-associated herpesvirus infection;African trypanosomiasis;Human cytomegalovirus infection;Amoebiasis;Estrogen signaling pathway;Rap1 signaling pathway;Ras signaling pathway;Th17 cell differentiation;Th1 and Th2 cell differentiation;Vascular smooth muscle contraction;ErbB signaling pathway;Choline metabolism in cancer;Natural killer cell mediated cytotoxicity;VEGF signaling pa…	HMDB0007219;PW_C003270	M+NH4	C39H70O5	7.079	胶质瘤;卡波西肉瘤相关疱疹病毒感染;非洲锥虫病;人巨细胞病毒感染;阿米巴病;雌激素信号通路;Rap1信号通路;Ras信号通路;Th17细胞分化;Th1和Th2细胞分化;血管平滑肌收缩;ErbB信号通路;癌症的胆碱代谢;自然杀伤细胞介导的细胞毒性;VEGF信号通路;Apelin信号通路;磷脂酶D信号通路;鞘脂信号通路;癌症中PD-L1的表达和PD-1检查点通路;催产素信号通路;糖尿病性心肌病;TRP通道的炎症介质调节;甲状腺激素信号通路;糖尿病并发症中的AGE-RAGE信号通路;内分泌和其他因子调节钙重吸收;帕金森病;脂肪细胞因子信号通路;脂肪细胞脂解的调控;醛固酮的合成和分泌;脊髓小脑共济失调;松弛素信号通路;冠状病毒疾病-新冠肺炎;5-羟色胺能突触;胆碱能突触;谷氨酸能突触;逆行内源性大麻素信号传导;多巴胺能突触;非小细胞肺癌;长期增益效应;Fc-γR-介导的吞噬作用;人类免疫缺陷病毒…	C00165	pos	-	-	Human Diseases;Human Diseases;Human Diseases;Human Diseases;Human Diseases;Organismal Systems;Environmental Information Processing;Environmental Information Processing;Organismal Systems;Organismal Systems;Organismal Systems;Environmental Information Processing;Human Diseases;Organismal Systems;Environmental Information Processing;Environmental Information Processing;Environmental Information Pro…	Cancer: specific types;Infectious disease: viral;Infectious disease: parasitic;Infectious disease: viral;Infectious disease: parasitic;Endocrine system;Signal transduction;Signal transduction;Immune system;Immune system;Circulatory system;Signal transduction;Cancer: overview;Immune system;Signal transduction;Signal transduction;Signal transduction;Signal transduction;Cancer: overview;Endocrine sy…	Lipids and lipid-like molecules	Fatty Acyls	636.555	0.142643	0	91.5	-1.3959	91125-76-7	Lineolic acids and derivatives	5.636	5.721	5.576	5.272	5.487	5.716	5.595	5.711	5.491	5.455	5.609	5.465	5.516	5.696	5.644	5.673	5.638	5.369	5.953	5.699	5.66	5.467	5.55
pos_4930	PC(20:3(5Z,8Z,11Z)/18:0)	-	metab_4774	B(ii)	map01100;map00564;map00590;map00591;map00592;map05231;map04723	Metabolic pathways;Glycerophospholipid metabolism;Arachidonic acid metabolism;Linoleic acid metabolism;alpha-Linolenic acid metabolism;Choline metabolism in cancer;Retrograde endocannabinoid signaling	LMGP01012196;PW_C004414;HMDB0008366	M+H	C46H86NO8P	7.0843	代谢途径;甘油磷脂代谢;花生四烯酸代谢;亚油酸代谢;α-亚麻酸代谢;癌症的胆碱代谢;逆行内源性大麻素信号传导	C00157	pos	Lipids	Phospholipids	Metabolism;Metabolism;Metabolism;Metabolism;Metabolism;Human Diseases;Organismal Systems	Global and overview maps;Lipid metabolism;Lipid metabolism;Lipid metabolism;Lipid metabolism;Cancer: overview;Nervous system	Lipids and lipid-like molecules	Glycerophospholipids	812.614	0.253003	0	73.4	-2.67616	-	Glycerophosphocholines	7.668	7.765	7.635	7.611	7.687	7.781	7.677	7.861	7.798	7.473	7.624	7.701	7.768	7.705	7.679	7.69	7.774	7.589	7.793	7.563	7.634	7.587	7.701
pos_4931	Becocalcidiol	贝骨化醇	metab_4775	B(ii)	-	-	HMDB0248927	2M+ACN+Na	C23H36O2	7.0951	-	-	pos	-	-	-	-	Lipids and lipid-like molecules	Steroids and steroid derivatives	752.557	0.257569	0	46	-2.15048	-	Vitamin D and derivatives	5.97	6.123	6.054	6.124	6.009	5.763	6.011	6.082	5.85	6.094	5.985	5.842	5.946	5.92	5.961	5.888	5.981	5.895	5.789	5.983	5.936	5.844	5.929
pos_4941	LysoPC(24:1(15Z)/0:0)	-	metab_4786	B(ii)	map00564;map05231	Glycerophospholipid metabolism;Choline metabolism in cancer	HMDB0010406	M+H	C32H64NO7P	7.1216	甘油磷脂代谢;癌症的胆碱代谢	C04230	pos	Lipids	Phospholipids	Metabolism;Human Diseases	Lipid metabolism;Cancer: overview	Lipids and lipid-like molecules	Glycerophospholipids	606.448	0.0407980652634	0	86.4	-1.75595	-	Glycerophosphocholines	6.256	6.134	6.186	6.147	6.055	6.179	6.146	6.199	6.048	6.292	6.238	6.17	6.05	6.395	6.088	6.149	6.065	5.962	6.438	6.092	6.23	5.994	6.132
pos_4949	PA(20:3(6,8,11)-OH(5)/10:0)	-	metab_4794	B(ii)	-	-	HMDB0262742	M+H-2H2O	C33H59O9P	7.1428	-	-	pos	-	-	-	-	Not Available	Not Available	595.381	0.0259460719026	0	38.8	7.46247240768057	-	Not Available	6.034	6.104	6.052	5.977	5.996	6.01	5.921	6.036	6.066	6.07	6.021	6.075	6.068	6.085	6.114	6.043	6.076	5.995	6.21	6.128	6	6.116	6.054
pos_495	PI(5-iso PGF2VI/22:5(7Z,10Z,13Z,16Z,19Z))	-	metab_4795	B(ii)	-	-	HMDB0278254	M+H+Na, M+2Na	C49H79O16P	4.252	-	-	pos	-	-	-	-	Not Available	Not Available	489.255	0.0367346849148	0	57.2	3.8763430746446	-	Not Available	6.115	6.152	6.187	6.092	6.103	6.129	6.179	6.012	5.919	6.121	6.368	6.108	6.027	6.158	6.141	6.268	6.286	5.873	6.199	6.368	5.987	6.002	6.053
pos_4950	PA(20:3(8Z,11Z,14Z)-2OH(5,6)/14:1(9Z))	-	metab_4796	B(ii)	-	-	HMDB0263101	M+H-H2O	C37H65O10P	7.1428	-	-	pos	-	-	-	-	Not Available	Not Available	683.433	0.0737404444896	0	75.2	6.3531654878582415	-	Not Available	5.943	5.999	5.951	5.91	5.951	5.919	5.852	5.958	5.99	6.026	5.969	5.996	6.005	6.019	6.038	5.971	5.986	5.947	6.126	6.045	5.92	6.057	5.986
pos_4952	Vomifoliol	催吐叶醇	metab_4798	B(ii)	-	-	HMDB0303570	M+ACN+H	C13H20O3	7.1534	-	C04166	pos	-	-	-	-	Lipids and lipid-like molecules	Prenol lipids	266.175	0.0516089550972	0	52.1	-1.65342	-	Sesquiterpenoids	5.639	5.68	5.632	5.553	5.594	5.613	5.481	5.62	5.637	5.675	5.637	5.671	5.626	5.694	5.717	5.654	5.659	5.563	5.794	5.738	5.572	5.683	5.659
pos_4953	Ethoxyquin	乙氧喹	metab_4799	B(ii)	-	-	HMDB0039531;MJDBOTE0001752	M+ACN+Na	C14H19NO	7.1587	-	C07475	pos	-	-	-	-	Organoheterocyclic compounds	Quinolines and derivatives	281.164	0.0185982383975	0	50.7	8.34646202758776	91-53-2	Quinolones and derivatives	5.923	5.935	5.926	5.848	5.904	5.912	5.824	5.921	5.93	5.953	5.909	5.945	5.913	5.952	5.99	5.936	5.932	5.887	6.093	5.998	5.887	5.945	5.932
pos_496	Quillaic acid 3-[rhamnosyl-(1->3)-[galactosyl-(1->2)]-glucuronide]	奎莱酸3-[鼠李糖基-（1->3）-[半乳糖基-（1->2）]-葡萄糖醛酸]	metab_4806	B(ii)	-	-	HMDB0033405	M+H+Na, M+2Na	C48H74O20	4.2573	-	-	pos	-	-	-	-	Lipids and lipid-like molecules	Prenol lipids	497.24	0.0501521262104	0	40.2	5.5381210900590885	210426-59-8	Terpene glycosides	6.333	6.463	6.511	6.37	6.145	6.377	6.587	6.359	6.279	6.267	6.487	6.5	6.327	6.389	6.399	6.514	6.57	5.945	6.404	6.515	6.232	6.417	6.238
pos_4963	Grayanotoxin	木藜芦毒素	metab_4810	B(ii)	-	-	HMDB0246239	M+H	C20H34O5	7.1746	-	-	pos	-	-	-	-	Lipids and lipid-like molecules	Prenol lipids	355.245	0.00825979225069	0	40.9	-9.14063	-	Diterpenoids	6.746	6.731	6.74	6.662	6.691	6.725	6.719	6.69	6.72	6.735	6.715	6.722	6.722	6.728	6.761	6.739	6.715	6.682	6.92	6.794	6.707	6.713	6.722
pos_4977	PE(22:4(7Z,10Z,13Z,16Z)/15:0)	-	metab_4824	B(ii)	map01100;map00564;map00563;map04136;map05167;map04723;map04140	Metabolic pathways;Glycerophospholipid metabolism;Glycosylphosphatidylinositol (GPI)-anchor biosynthesis;Autophagy - other;Kaposi sarcoma-associated herpesvirus infection;Retrograde endocannabinoid signaling;Autophagy - animal	PW_C005630;LMGP02011106;HMDB0009582	M+H	C42H76NO8P	7.2011	代谢途径;甘油磷脂代谢;糖基磷脂酰肌醇（GPI）-锚定生物合成;自噬-其他;卡波西肉瘤相关疱疹病毒感染;逆行内源性大麻素信号传导;自噬-动物	C00350	pos	Lipids	Phospholipids	Metabolism;Metabolism;Metabolism;Cellular Processes;Human Diseases;Organismal Systems;Cellular Processes	Global and overview maps;Lipid metabolism;Glycan biosynthesis and metabolism;Transport and catabolism;Infectious disease: viral;Nervous system;Transport and catabolism	Lipids and lipid-like molecules	Glycerophospholipids	754.536	0.0323907250537	0	44.7	-2.18811	-	Glycerophosphoethanolamines	6.597	6.572	6.641	6.431	6.752	6.634	6.987	6.547	6.312	6.518	6.67	6.495	6.611	6.426	6.35	6.539	6.481	6.625	6.544	6.536	6.689	6.47	6.575
pos_4982	DG(18:2(9Z,12Z)/18:0/0:0)	-	metab_4830	B(ii)	map05214;map05167;map05143;map05163;map05146;map04915;map04015;map04014;map04659;map04658;map04270;map04012;map05231;map04650;map04370;map04371;map04072;map04071;map05235;map04921;map05415;map04750;map04919;map04933;map04961;map05012;map04920;map04923;map04925;map05017;map04926;map05171;map04726;map04725;map04724;map04723;map04728;map05223;map04720;map04666;map05170;map04664;map04540;map04662;map…	Glioma;Kaposi sarcoma-associated herpesvirus infection;African trypanosomiasis;Human cytomegalovirus infection;Amoebiasis;Estrogen signaling pathway;Rap1 signaling pathway;Ras signaling pathway;Th17 cell differentiation;Th1 and Th2 cell differentiation;Vascular smooth muscle contraction;ErbB signaling pathway;Choline metabolism in cancer;Natural killer cell mediated cytotoxicity;VEGF signaling pa…	PW_C003296;HMDB0007245	M+NH4	C39H72O5	7.233	胶质瘤;卡波西肉瘤相关疱疹病毒感染;非洲锥虫病;人巨细胞病毒感染;阿米巴病;雌激素信号通路;Rap1信号通路;Ras信号通路;Th17细胞分化;Th1和Th2细胞分化;血管平滑肌收缩;ErbB信号通路;癌症的胆碱代谢;自然杀伤细胞介导的细胞毒性;VEGF信号通路;Apelin信号通路;磷脂酶D信号通路;鞘脂信号通路;癌症中PD-L1的表达和PD-1检查点通路;催产素信号通路;糖尿病性心肌病;TRP通道的炎症介质调节;甲状腺激素信号通路;糖尿病并发症中的AGE-RAGE信号通路;内分泌和其他因子调节钙重吸收;帕金森病;脂肪细胞因子信号通路;脂肪细胞脂解的调控;醛固酮的合成和分泌;脊髓小脑共济失调;松弛素信号通路;冠状病毒疾病-新冠肺炎;5-羟色胺能突触;胆碱能突触;谷氨酸能突触;逆行内源性大麻素信号传导;多巴胺能突触;非小细胞肺癌;长期增益效应;Fc-γR-介导的吞噬作用;人类免疫缺陷病毒…	C00165	pos	-	-	Human Diseases;Human Diseases;Human Diseases;Human Diseases;Human Diseases;Organismal Systems;Environmental Information Processing;Environmental Information Processing;Organismal Systems;Organismal Systems;Organismal Systems;Environmental Information Processing;Human Diseases;Organismal Systems;Environmental Information Processing;Environmental Information Processing;Environmental Information Pro…	Cancer: specific types;Infectious disease: viral;Infectious disease: parasitic;Infectious disease: viral;Infectious disease: parasitic;Endocrine system;Signal transduction;Signal transduction;Immune system;Immune system;Circulatory system;Signal transduction;Cancer: overview;Immune system;Signal transduction;Signal transduction;Signal transduction;Signal transduction;Cancer: overview;Endocrine sy…	Lipids and lipid-like molecules	Fatty Acyls	638.571	0.0185649493865	0	64.2	-1.88149	-	Lineolic acids and derivatives	5.994	6.024	6.011	5.932	5.929	5.998	5.885	6	6.041	6.012	5.992	6.033	6.039	6.027	6.06	6.005	5.994	5.993	6.117	6.038	5.979	6.047	6.011
pos_4994	10-Hydroxydecanoic acid	10-羟基癸酸	metab_4843	B(ii)	-	-	HMDB0244272	2M+Na	C10H20O3	7.2489	-	C02774	pos	-	-	-	-	Organic acids and derivatives	Hydroxy acids and derivatives	399.271	0.0494028076204	0	62.6	-2.57524	1679-53-4	Medium-chain hydroxy acids and derivatives	6.11	6.1	6.11	6.033	6.05	6.073	6.001	6.082	6.085	6.113	6.07	6.111	6.085	6.109	6.144	6.084	6.091	6.043	6.247	6.146	6.047	6.083	6.096
pos_5007	Kuguacin E	-	metab_4859	B(ii)	-	-	HMDB0302099	M+K	C27H42O4	7.2595	-	-	pos	-	-	-	-	Lipids and lipid-like molecules	Prenol lipids	469.274	0.0752256113165	0	41	5.25446848024831	-	Sesquiterpenoids	5.892	5.953	5.905	5.874	5.804	5.843	5.74	5.873	5.924	5.888	5.893	5.888	5.92	5.918	5.992	5.896	5.92	5.867	6.066	6.005	5.836	5.963	5.888
pos_501	2,8-Dihydroxyquinoline-beta-D-glucuronide	2，8 -二羟基喹啉- β - D -葡萄糖醛酸苷	metab_4862	B(ii)	-	-	HMDB0011658	M+H, M+Na	C15H15NO8	4.2945	-	-	pos	-	-	-	-	Organic oxygen compounds	Organooxygen compounds	338.087	0.110228	0	62.5	-1.50417	-	Carbohydrates and carbohydrate conjugates	5.58	5.358	3.818	5.205	5.222	5.271	5.511	5.527	4.928	5.183	5.105	5.506	5.461	5.56	5.479	5.576	4.92	5.423	5.732	5.599	5.769	5.086	4.511
pos_5015	PE-NMe2(14:0/22:5(7Z,10Z,13Z,16Z,19Z))	-	metab_4868	B(ii)	map01100;map00564	Metabolic pathways;Glycerophospholipid metabolism	PW_C059911;HMDB0113895	2M+3H2O+2H	C43H76NO8P	7.2861	代谢途径;甘油磷脂代谢	C04308	pos	-	-	Metabolism;Metabolism	Global and overview maps;Lipid metabolism	Lipids and lipid-like molecules	Glycerophospholipids	779.537	0.00535661557141	0	56.5	-6.43228	-	Glycerophosphoethanolamines	6.175	6.117	6.163	5.987	6.277	6.122	6.344	6.059	6.035	6.175	6.175	6.172	6.077	6.117	6.131	6.235	5.996	6.199	6.259	6.243	6.143	5.993	6.198
pos_5019	PC(18:4(6Z,9Z,12Z,15Z)/22:5(4Z,7Z,10Z,13Z,16Z))	-	metab_4872	B(ii)	map01100;map00564;map00590;map00591;map00592;map05231;map04723	Metabolic pathways;Glycerophospholipid metabolism;Arachidonic acid metabolism;Linoleic acid metabolism;alpha-Linolenic acid metabolism;Choline metabolism in cancer;Retrograde endocannabinoid signaling	PW_C004301;HMDB0008253	2M+3H2O+2H	C48H78NO8P	7.2915	代谢途径;甘油磷脂代谢;花生四烯酸代谢;亚油酸代谢;α-亚麻酸代谢;癌症的胆碱代谢;逆行内源性大麻素信号传导	C00157	pos	Lipids	Phospholipids	Metabolism;Metabolism;Metabolism;Metabolism;Metabolism;Human Diseases;Organismal Systems	Global and overview maps;Lipid metabolism;Lipid metabolism;Lipid metabolism;Lipid metabolism;Cancer: overview;Nervous system	Lipids and lipid-like molecules	Glycerophospholipids	841.557	0.0934125318042	0	39.7	-1.40744	-	Glycerophosphocholines	6.711	6.483	6.491	6.596	6.73	6.609	6.727	6.351	6.418	6.386	6.526	6.567	6.579	6.172	6.336	6.579	6.398	6.546	6.464	6.402	6.512	6.438	6.477
pos_5020	PE(18:3(9Z,12Z,15Z)/20:3(8Z,11Z,14Z))	-	metab_4874	B(ii)	map01100;map00564;map00563;map04136;map05167;map04723;map04140	Metabolic pathways;Glycerophospholipid metabolism;Glycosylphosphatidylinositol (GPI)-anchor biosynthesis;Autophagy - other;Kaposi sarcoma-associated herpesvirus infection;Retrograde endocannabinoid signaling;Autophagy - animal	PW_C005215;HMDB0009167;LMGP02010729	M+H	C43H74NO8P	7.2968	代谢途径;甘油磷脂代谢;糖基磷脂酰肌醇（GPI）-锚定生物合成;自噬-其他;卡波西肉瘤相关疱疹病毒感染;逆行内源性大麻素信号传导;自噬-动物	C00350	pos	Lipids	Phospholipids	Metabolism;Metabolism;Metabolism;Cellular Processes;Human Diseases;Organismal Systems;Cellular Processes	Global and overview maps;Lipid metabolism;Glycan biosynthesis and metabolism;Transport and catabolism;Infectious disease: viral;Nervous system;Transport and catabolism	Lipids and lipid-like molecules	Glycerophospholipids	764.522	0.0397331496526	0	75.4	-1.21976	-	Glycerophosphoethanolamines	5.481	5.318	5.133	5.269	5.308	5.292	5.584	5.354	5.384	5.353	5.124	5.12	5.114	5.033	5.191	5.58	5.182	5.496	5.415	5.423	5.369	5.373	5.061
pos_5030	DG(20:4(8Z,11Z,14Z,17Z)/18:1(11Z)/0:0)	-	metab_4885	B(ii)	map05214;map05167;map05143;map05163;map05146;map04915;map04015;map04014;map04659;map04658;map04270;map04012;map05231;map04650;map04370;map04371;map04072;map04071;map05235;map04921;map05415;map04750;map04919;map04933;map04961;map05012;map04920;map04923;map04925;map05017;map04926;map05171;map04726;map04725;map04724;map04723;map04728;map05223;map04720;map04666;map05170;map04664;map04540;map04662;map…	Glioma;Kaposi sarcoma-associated herpesvirus infection;African trypanosomiasis;Human cytomegalovirus infection;Amoebiasis;Estrogen signaling pathway;Rap1 signaling pathway;Ras signaling pathway;Th17 cell differentiation;Th1 and Th2 cell differentiation;Vascular smooth muscle contraction;ErbB signaling pathway;Choline metabolism in cancer;Natural killer cell mediated cytotoxicity;VEGF signaling pa…	PW_C003587;HMDB0007536	M+2Na-H	C41H70O5	7.3557	胶质瘤;卡波西肉瘤相关疱疹病毒感染;非洲锥虫病;人巨细胞病毒感染;阿米巴病;雌激素信号通路;Rap1信号通路;Ras信号通路;Th17细胞分化;Th1和Th2细胞分化;血管平滑肌收缩;ErbB信号通路;癌症的胆碱代谢;自然杀伤细胞介导的细胞毒性;VEGF信号通路;Apelin信号通路;磷脂酶D信号通路;鞘脂信号通路;癌症中PD-L1的表达和PD-1检查点通路;催产素信号通路;糖尿病性心肌病;TRP通道的炎症介质调节;甲状腺激素信号通路;糖尿病并发症中的AGE-RAGE信号通路;内分泌和其他因子调节钙重吸收;帕金森病;脂肪细胞因子信号通路;脂肪细胞脂解的调控;醛固酮的合成和分泌;脊髓小脑共济失调;松弛素信号通路;冠状病毒疾病-新冠肺炎;5-羟色胺能突触;胆碱能突触;谷氨酸能突触;逆行内源性大麻素信号传导;多巴胺能突触;非小细胞肺癌;长期增益效应;Fc-γR-介导的吞噬作用;人类免疫缺陷病毒…	C00165	pos	-	-	Human Diseases;Human Diseases;Human Diseases;Human Diseases;Human Diseases;Organismal Systems;Environmental Information Processing;Environmental Information Processing;Organismal Systems;Organismal Systems;Organismal Systems;Environmental Information Processing;Human Diseases;Organismal Systems;Environmental Information Processing;Environmental Information Processing;Environmental Information Pro…	Cancer: specific types;Infectious disease: viral;Infectious disease: parasitic;Infectious disease: viral;Infectious disease: parasitic;Endocrine system;Signal transduction;Signal transduction;Immune system;Immune system;Circulatory system;Signal transduction;Cancer: overview;Immune system;Signal transduction;Signal transduction;Signal transduction;Signal transduction;Cancer: overview;Endocrine sy…	Lipids and lipid-like molecules	Glycerolipids	687.495	0.0186663	0	31.3	1.7815937470723602	-	Diradylglycerols	5.98	5.564	5.32	5.615	5.894	5.746	5.4	5.943	5.63	5.853	5.957	6.049	6.048	5.882	6.146	6.035	5.815	6.1	5.945	6.175	5.744	6.144	5.627
pos_5036	Tirofiban	替罗非班	metab_4891	B(ii)	-	-	HMDB0014913;PW_C009242	M+H	C22H36N2O5S	7.3663	-	C07965	pos	-	-	-	-	Organic acids and derivatives	Carboxylic acids and derivatives	441.242	0.0305781876655	0	43.3	1.46469459500248	144494-65-5	Amino acids, peptides, and analogues	5.835	5.832	5.824	5.658	5.775	5.792	5.504	5.816	5.879	5.906	5.83	5.922	5.793	5.955	5.996	5.85	5.902	5.734	6.07	5.969	5.728	5.861	5.907
pos_5037	Yuccagenin	丝兰皂甙元	metab_4892	B(ii)	-	-	LMST01080011;HMDB0303386	M+K	C27H42O4	7.3663	-	-	pos	-	-	-	-	Lipids and lipid-like molecules	Prenol lipids	469.274	0.0582033071122	0	37.3	5.0420812158387305	-	Triterpenoids	5.786	5.789	5.775	5.621	5.734	5.743	5.45	5.775	5.815	5.855	5.779	5.853	5.713	5.9	5.92	5.813	5.856	5.673	6	5.909	5.664	5.823	5.849
pos_504	Diprotin A	脯氨抑素A	metab_4895	B(ii)	-	-	HMDB0251473	M+H-H2O, M+Na	C17H31N3O4	4.3105	-	-	pos	-	-	-	-	Organoheterocyclic compounds	Pyrroles	324.227	0.0242932340599	0	78.6	-1.99754	-	Substituted pyrroles	5	5.02	5.021	5.013	4.999	5.023	5.02	5.022	5.028	5.051	5.019	5.012	5.029	5.021	5.023	5.014	5.016	4.985	5.136	5.033	5.008	5.013	5.034
pos_5048	SM(d18:1/14:0)	-	metab_4904	B(ii)	-	-	LMSP03010028;HMDB0012097	M+H	C37H75N2O6P	7.3824	-	-	pos	-	-	-	-	Lipids and lipid-like molecules	Sphingolipids	675.543	0.0258851039817	0	64.6	-1.31718	121999-55-1	Phosphosphingolipids	5.871	5.885	5.872	5.84	5.813	5.824	5.85	5.907	5.701	5.984	5.946	5.886	5.724	6.018	5.842	5.956	5.897	5.612	6.095	5.86	5.823	5.777	5.913
pos_5053	PC(15:0/16:1(9Z))	-	metab_4910	B(ii)	map01100;map00564;map00590;map00591;map00592;map05231;map04723	Metabolic pathways;Glycerophospholipid metabolism;Arachidonic acid metabolism;Linoleic acid metabolism;alpha-Linolenic acid metabolism;Choline metabolism in cancer;Retrograde endocannabinoid signaling	HMDB0007936;LMGP01010535;PW_C003986	M+H	C39H76NO8P	7.4089	代谢途径;甘油磷脂代谢;花生四烯酸代谢;亚油酸代谢;α-亚麻酸代谢;癌症的胆碱代谢;逆行内源性大麻素信号传导	C00157	pos	Lipids	Phospholipids	Metabolism;Metabolism;Metabolism;Metabolism;Metabolism;Human Diseases;Organismal Systems	Global and overview maps;Lipid metabolism;Lipid metabolism;Lipid metabolism;Lipid metabolism;Cancer: overview;Nervous system	Lipids and lipid-like molecules	Glycerophospholipids	718.538	0.182499	0	34.6	0.226835552144814	-	Glycerophosphocholines	4.808	4.204	4.186	4.239	4.81	4.506	4.857	4.851	4.198	4.566	4.852	4.837	4.222	4.809	4.622	5.005	4.639	4.698	4.595	4.785	4.234	4.305	4.776
pos_506	PI(LTE4/20:4(8Z,11Z,14Z,17Z))	-	metab_4917	B(ii)	-	-	HMDB0277622	M+H+Na, M+2Na	C52H84NO16PS	4.3318	-	-	pos	-	-	-	-	Not Available	Not Available	532.758	0.0618730156833	0	40.7	-4.88045	-	Not Available	5.844	5.87	5.921	5.894	5.965	5.906	6.021	6.109	5.909	5.952	5.932	5.839	6.018	5.785	5.969	6.095	6.096	6.067	5.721	6.187	6.152	6.174	5.847
pos_5060	PC(16:0/20:4(8Z,11Z,14Z,17Z))	-	metab_4918	B(ii)	map01100;map00564;map00590;map00591;map00592;map05231;map04723	Metabolic pathways;Glycerophospholipid metabolism;Arachidonic acid metabolism;Linoleic acid metabolism;alpha-Linolenic acid metabolism;Choline metabolism in cancer;Retrograde endocannabinoid signaling	HMDB0007983;LMGP01012136;PW_C004032	M+H	C44H80NO8P	7.4464	代谢途径;甘油磷脂代谢;花生四烯酸代谢;亚油酸代谢;α-亚麻酸代谢;癌症的胆碱代谢;逆行内源性大麻素信号传导	C00157	pos	Lipids	Phospholipids	Metabolism;Metabolism;Metabolism;Metabolism;Metabolism;Human Diseases;Organismal Systems	Global and overview maps;Lipid metabolism;Lipid metabolism;Lipid metabolism;Lipid metabolism;Cancer: overview;Nervous system	Lipids and lipid-like molecules	Glycerophospholipids	782.568	0.0467990627679	0	81	-2.18815	-	Glycerophosphocholines	8.358	8.339	8.474	8.446	8.406	8.425	8.526	8.384	8.338	8.364	8.375	8.286	8.347	8.307	8.212	8.302	8.268	8.349	8.368	8.268	8.444	8.312	8.269
pos_5062	Diethylaminoethyl-dextran	考来糖酐	metab_4920	B(ii)	-	-	HMDB0251242	M+H-2H2O	C24H45NO16	7.4623	-	-	pos	-	-	-	-	Lipids and lipid-like molecules	Fatty Acyls	568.263	0.0901344037592	0	69.3	5.70283540318201	-	Fatty acyl glycosides	5.57	5.51	5.567	5.325	5.298	5.417	5.434	5.342	5.64	5.66	5.61	5.535	5.361	5.579	5.673	5.523	5.691	5.282	5.673	5.617	5.087	5.792	5.536
pos_5063	PC(O-16:1(9Z)/18:0)	-	metab_4921	B(ii)	-	-	LMGP01020256;HMDB0013412	M+H	C42H84NO7P	7.4676	-	-	pos	-	-	-	-	Lipids and lipid-like molecules	Glycerophospholipids	746.603	0.172856	0	43.1	-3.57155	-	Glycerophosphocholines	5.294	5.651	5.667	5.619	5.732	5.514	5.742	5.912	5.697	5.408	5.381	5.411	5.274	5.577	5.106	5.265	5.682	5.319	5.177	5.226	5.154	5.399	5.316
pos_507	Relamorelin	雷拉莫林	metab_4928	B(ii)	-	-	HMDB0257141	M+2H, M+H	C43H50N8O5S	4.337	-	-	pos	-	-	-	-	Organic acids and derivatives	Carboxylic acids and derivatives	396.192	0.0610394822796	0	32.9	9.05054279929288	-	Amino acids, peptides, and analogues	5.73	5.732	5.816	5.851	5.355	5.721	5.666	5.58	5.389	5.882	5.858	5.657	5.467	5.991	5.782	5.779	5.997	4.887	6.144	5.846	5.333	5.475	5.867
pos_5075	PC(16:0/5-iso PGF2VI)	-	metab_4934	B(ii)	-	-	HMDB0285939	M+2H	C42H78NO11P	7.494	-	-	pos	-	-	-	-	Not Available	Not Available	402.773	0.142532	0	51.6	-0.862765	-	Not Available	5.632	5.663	5.718	5.75	5.702	5.646	5.775	5.652	5.629	5.563	5.617	5.452	5.617	5.427	5.397	5.492	5.559	5.646	5.565	5.505	5.66	5.597	5.507
pos_5076	(11Z,14Z)-Henicosa-11,14-dienoylcarnitine	（11Z，14Z）-Henicosa-11,14-二烯酰基肉碱	metab_4935	B(ii)	-	-	HMDB0241598	M+K	C28H51NO4	7.494	-	-	pos	-	-	-	-	Lipids and lipid-like molecules	Fatty Acyls	504.344	0.0791443314679	0	49.9	-3.10721	-	Fatty acid esters	5.633	5.454	5.381	5.487	5.646	5.447	5.578	5.342	5.373	5.327	5.473	5.471	5.539	5.286	5.368	5.54	5.394	5.51	5.441	5.481	5.325	5.362	5.317
pos_5085	PC(16:0/0:0)	-	metab_4945	B(i)	map00564;map05231	Glycerophospholipid metabolism;Choline metabolism in cancer	LMGP01050018;HMDB0010382	M+H-H2O	C24H50NO7P	7.4994	甘油磷脂代谢;癌症的胆碱代谢	C04230	pos	Lipids	Phospholipids	Metabolism;Human Diseases	Lipid metabolism;Cancer: overview	Lipids and lipid-like molecules	Glycerophospholipids	478.329	0.0602229208989	40.5	0	-1.31983	17364-16-8	Glycerophosphocholines	6.327	6.358	6.372	6.4	6.336	6.335	6.403	6.325	6.291	6.25	6.276	6.18	6.275	6.136	6.127	6.198	6.239	6.27	6.288	6.221	6.303	6.257	6.202
pos_5113	Oligomycin	寡霉素	metab_4977	B(ii)	-	-	HMDB0255952	M+2Na	C45H74O11	7.5153	-	-	pos	-	-	-	-	Phenylpropanoids and polyketides	Macrolides and analogues	418.249	0.175441	0	68.8	-4.19654	-	Not Available	5.948	5.989	5.998	6.01	5.95	5.936	6.022	5.925	5.869	5.813	5.843	5.719	5.859	5.698	5.67	5.731	5.779	5.865	5.825	5.769	5.883	5.83	5.755
pos_5115	Isoetharine	异他林	metab_4979	B(ii)	-	-	HMDB0014366	2M+ACN+H	C13H21NO3	7.5153	-	C07053	pos	-	-	-	-	Benzenoids	Phenols	520.338	0.0564040323712	0	48.3	-1.17741	530-08-5	Benzenediols	5.568	5.502	5.514	5.468	5.492	5.506	5.465	5.523	5.554	5.698	5.551	5.577	5.469	5.658	5.584	5.617	5.627	5.446	5.713	5.615	5.497	5.439	5.582
pos_5139	(2-Amino-3-hydroxyoctadecyl) dihydrogen phosphate	（2-氨基-3-羟基十八烷基）磷酸二氢钠	metab_5005	B(ii)	-	-	HMDB0242462	M+H	C18H40NO5P	7.5365	-	-	pos	-	-	-	-	Lipids and lipid-like molecules	Sphingolipids	382.272	0.0871812532305	0	50.9	-0.375736	-	Phosphosphingolipids	5.521	5.444	5.572	5.241	5.264	5.416	5.473	5.555	5.518	5.364	5.348	5.392	5.414	5.401	5.39	5.51	5.393	5.466	5.41	5.484	5.299	5.458	5.29
pos_5198	Imipenem	亚胺硫霉素	metab_5070	B(ii)	-	-	HMDB0015536	2M+H	C12H17N3O4S	7.6642	-	C06665	pos	Antibiotics	beta-Lactams	-	-	Organoheterocyclic compounds	Lactams	599.193	0.0291407116518	0	47.7	-3.18265	64221-86-9;74431-23-5	Beta lactams	4.335	4.223	4.508	4.301	3.964	4.392	4.616	4.279	4.42	4.323	4.446	4.234	4.231	4.317	4.321	4.417	4.556	4.435	4.214	4.441	3.715	4.661	4.272
pos_5204	Isoamyl isothiocyanate	异硫氰酸异戊酯	metab_5078	B(ii)	-	-	HMDB0032341	M+2Na-H	C6H11NS	7.7122	-	-	pos	-	-	-	-	Organosulfur compounds	Isothiocyanates	174.034	0.0229973003478	0	36.8	8.923846729519607	628-03-5	Not Available	5.761	5.757	5.766	5.737	5.768	5.758	5.775	5.737	5.749	5.746	5.731	5.733	5.73	5.737	5.743	5.727	5.744	5.729	5.864	5.746	5.723	5.719	5.739
pos_5225	(2E)-2-butylidene-4-hydroxy-5-methyl-3(2H)-furanone	（2E）-2-亚丁烯-4-羟基-5-甲基-3（2H）-呋喃酮	metab_5101	B(ii)	-	-	HMDB0303965	M+H	C9H11O3-	7.9852	-	-	pos	-	-	-	-	Organoheterocyclic compounds	Dihydrofurans	168.077	0.0396562248216	0	39.4	-9.35282	-	Furanones	3.556	3.6	3.522	3.51	3.568	3.579	3.586	3.518	3.481	3.57	3.522	3.568	3.567	3.482	3.503	3.46	3.533	3.477	3.613	3.489	3.533	3.538	3.5
pos_524	Dodecenoylcarnitine	十二烯酰基肉碱	metab_5117	B(ii)	-	-	HMDB0251567	M+H, M+Na	C19H35NO4	4.5772	-	-	pos	-	-	-	-	Lipids and lipid-like molecules	Fatty Acyls	342.265	0.0423982512168	0	49.8	4.28750164567118	-	Fatty acids and conjugates	5.939	5.933	5.958	5.912	5.946	5.929	5.953	5.924	5.94	5.961	5.928	5.956	5.944	5.952	5.959	5.947	5.921	5.912	6.051	5.944	5.949	5.921	5.964
pos_5253	Leucylleucine	亮氨酰亮氨酸	metab_5132	B(ii)	-	-	HMDB0254039;HMDB0028933	M+H-H2O	C12H24N2O3	7.6695	-	C11332	pos	-	-	-	-	Organic acids and derivatives	Carboxylic acids and derivatives	227.175	0.0172216677746	0	62.6	-0.947788	3303-31-9	Amino acids, peptides, and analogues	5.977	5.964	5.963	5.929	5.954	5.954	5.954	5.933	5.952	5.978	5.945	5.957	5.93	5.961	5.964	5.94	5.924	5.892	6.073	5.97	5.927	5.925	5.961
pos_5268	Taurochenodeoxycholic Acid	牛黄鹅去氧胆酸	metab_5148	B(i)	map04979;map04976;map00120	Cholesterol metabolism;Bile secretion;Primary bile acid biosynthesis	HMDB0242411;HMDB0000951;HMDB0000949;LMST05040005;MJDBOTE0001075	M+NH4	C26H45NO6S	7.5949	胆固醇代谢;胆汁分泌;初级胆汁酸生物合成	C05465	pos	-	-	Organismal Systems;Organismal Systems;Metabolism	Digestive system;Digestive system;Lipid metabolism	Lipids and lipid-like molecules	Steroids and steroid derivatives	517.33	0.237401	80.9	0	-1.22748	53-02-1;516-35-8	Bile acids, alcohols and derivatives	4.414	4.738	4.784	4.339	4.704	4.712	5.049	4.421	4.55	4.909	5.026	4.723	5.082	4.876	4.621	4.751	4.845	5.046	4.995	5	5.373	5.636	4.551
pos_5340	PE(20:4(8Z,11Z,14Z,17Z)-2OH(5S,6R)/18:1(9Z))	-	metab_5229	B(ii)	-	-	HMDB0261373	M+H+Na	C43H76NO10P	7.5365	-	-	pos	-	-	-	-	Not Available	Not Available	410.761	0.253995	0	30.2	7.03820195070316	-	Not Available	5.503	5.63	5.616	5.654	5.548	5.551	5.675	5.514	5.435	5.383	5.466	5.294	5.464	5.293	5.252	5.342	5.372	5.491	5.428	5.341	5.492	5.412	5.354
pos_5341	Sphingosine 1-phosphate	D-苏式-鞘胺醇-1-磷酸	metab_5230	B(ii)	map01100;map04666;map05152;map00600;map04080;map04020;map04371;map04072;map04071	Metabolic pathways;Fc gamma R-mediated phagocytosis;Tuberculosis;Sphingolipid metabolism;Neuroactive ligand-receptor interaction;Calcium signaling pathway;Apelin signaling pathway;Phospholipase D signaling pathway;Sphingolipid signaling pathway	HMDB0000277;PW_C000188	M+H	C18H38NO5P	7.5365	代谢途径;Fc-γR-介导的吞噬作用;肺结核;鞘脂代谢;神经活性配体-受体相互作用;钙信号通路;Apelin信号通路;磷脂酶D信号通路;鞘脂信号通路	C06124	pos	-	-	Metabolism;Organismal Systems;Human Diseases;Metabolism;Environmental Information Processing;Environmental Information Processing;Environmental Information Processing;Environmental Information Processing;Environmental Information Processing	Global and overview maps;Immune system;Infectious disease: bacterial;Lipid metabolism;Signaling molecules and interaction;Signal transduction;Signal transduction;Signal transduction;Signal transduction	Lipids and lipid-like molecules	Sphingolipids	380.256	0.00583103536647	0	62.6	-1.24035	26993-30-6	Phosphosphingolipids	6.026	6.017	6.068	5.864	5.886	5.971	5.972	6.04	6.018	6.042	5.933	5.967	5.958	6.007	5.997	6.001	5.966	5.95	6.073	5.972	5.953	5.989	5.946
pos_5414	Propylene carbonate	-	metab_5311	B(ii)	-	-	HMDB0256840	M+K	C4H6O3	7.5047	-	-	pos	-	-	-	-	Organic acids and derivatives	Organic carbonic acids and derivatives	140.996	0.0222754623473	0	31	6.913916639160268	-	Carbonic acid diesters	5.812	5.799	5.793	5.754	5.788	5.783	5.796	5.785	5.801	5.794	5.764	5.778	5.776	5.785	5.776	5.763	5.764	5.749	5.903	5.794	5.766	5.74	5.783
pos_5457	PC(24:0/0:0)	-	metab_5358	B(i)	map00564;map05231	Glycerophospholipid metabolism;Choline metabolism in cancer	HMDB0010405;LMGP01050057	M+H	C32H66NO7P	7.4782	甘油磷脂代谢;癌症的胆碱代谢	C04230	pos	Lipids	Phospholipids	Metabolism;Human Diseases	Lipid metabolism;Cancer: overview	Lipids and lipid-like molecules	Glycerophospholipids	608.465	0.0446742485125	92.5	0	-0.710522	-	Glycerophosphocholines	5.73	5.661	5.796	5.769	5.613	5.742	5.793	5.738	5.534	5.767	5.658	5.615	5.55	5.78	5.505	5.708	5.58	5.434	5.76	5.533	5.72	5.409	5.62
pos_5465	PC(P-16:0/22:6(4Z,7Z,10Z,13Z,16Z,19Z))	-	metab_5366	B(ii)	-	-	LMGP01030015;HMDB0011229	M+H	C46H80NO7P	7.4464	-	-	pos	-	-	-	-	Lipids and lipid-like molecules	Glycerophospholipids	790.572	0.109735	0	54.1	-3.72221	-	Glycerophosphocholines	5.705	5.699	5.657	5.586	5.524	5.685	5.544	5.652	5.796	5.671	5.573	5.562	5.544	5.856	5.444	5.594	5.581	5.363	5.803	5.503	5.626	5.399	5.732
pos_5473	GPCho(15:0/18:2)	-	metab_5375	B(i)	map01100;map00564;map00590;map00591;map00592;map05231;map04723	Metabolic pathways;Glycerophospholipid metabolism;Arachidonic acid metabolism;Linoleic acid metabolism;alpha-Linolenic acid metabolism;Choline metabolism in cancer;Retrograde endocannabinoid signaling	HMDB0007940	M+Na	C41H78NO8P	7.4196	代谢途径;甘油磷脂代谢;花生四烯酸代谢;亚油酸代谢;α-亚麻酸代谢;癌症的胆碱代谢;逆行内源性大麻素信号传导	C00157	pos	Lipids	Phospholipids	Metabolism;Metabolism;Metabolism;Metabolism;Metabolism;Human Diseases;Organismal Systems	Global and overview maps;Lipid metabolism;Lipid metabolism;Lipid metabolism;Lipid metabolism;Cancer: overview;Nervous system	Lipids and lipid-like molecules	Glycerophospholipids	766.532	0.0483648315231	86.9	0	-5.43981	-	Glycerophosphocholines	6.816	6.772	6.804	6.725	6.716	6.766	6.748	6.753	6.742	6.819	6.743	6.788	6.732	6.839	6.786	6.777	6.737	6.685	6.939	6.796	6.768	6.717	6.769
pos_5486	SM(d16:1/18:1)	-	metab_5389	B(i)	-	-	LMSP03010040	M+Na	C39H77N2O6P	7.377	-	-	pos	-	-	-	-	-	-	723.54	0.0565180967884	94.2	0	-1.4534	-	-	6.646	6.733	6.675	6.534	6.443	6.585	6.325	6.629	6.678	6.717	6.65	6.663	6.382	6.739	6.598	6.625	6.673	6.331	6.887	6.565	6.569	6.505	6.681
pos_5497	Methenamine	乌洛托品	metab_5401	B(i)	-	-	HMDB0029598	M+H	C6H12N4	7.3717	-	-	pos	-	-	-	-	Organoheterocyclic compounds	Triazinanes	141.113	0.0930774061709	84.2	0	-1.3695	100-97-0	1,3,5-triazinanes	5.037	5.065	5.024	4.966	5.049	5.06	4.93	5.069	5.129	5.155	5.089	5.139	5.077	5.176	5.191	5.102	5.108	5.034	5.287	5.185	5.02	5.113	5.146
pos_5498	PGP(18:0/16:0)	-	metab_5402	B(ii)	map01100;map00564	Metabolic pathways;Glycerophospholipid metabolism	PW_C008418;HMDB0013502	2M+3H2O+2H	C40H80O13P2	7.3663	代谢途径;甘油磷脂代谢	C03892	pos	-	-	Metabolism;Metabolism	Global and overview maps;Lipid metabolism	Lipids and lipid-like molecules	Glycerophospholipids	844.525	0.0765717269945	0	39.5	7.19880943085145	-	Glycerophosphoglycerophosphates	5.833	5.904	5.694	5.77	5.733	5.774	5.517	5.786	5.902	5.83	5.796	5.778	5.754	5.795	5.823	5.8	5.87	5.658	6.007	5.825	5.651	5.856	5.88
pos_5516	CL(18:0/22:5(4Z,7Z,10Z,13Z,16Z)/22:5(7Z,10Z,13Z,16Z,19Z)/18:0)	-	metab_5423	B(ii)	map01100;map00564	Metabolic pathways;Glycerophospholipid metabolism	HMDB0057312;PW_C037766	M+H+Na	C89H154O17P2	7.3075	代谢途径;甘油磷脂代谢	C05980	pos	Lipids	Phospholipids	Metabolism;Metabolism	Global and overview maps;Lipid metabolism	Lipids and lipid-like molecules	Glycerophospholipids	790.534	0.0673287293208	0	32.6	3.64470525759506	-	Glycerophosphoglycerophosphoglycerols	6.258	6.24	6.372	6.255	6.242	6.265	6.254	6.214	6.143	6.228	6.241	6.218	6.242	6.198	6.221	6.166	6.2	6.245	6.297	6.293	6.309	6.207	6.214
pos_5524	PC(16:0/18:3(9Z,12Z,15Z))	-	metab_5432	B(ii)	map01100;map00564;map00590;map00591;map00592;map05231;map04723	Metabolic pathways;Glycerophospholipid metabolism;Arachidonic acid metabolism;Linoleic acid metabolism;alpha-Linolenic acid metabolism;Choline metabolism in cancer;Retrograde endocannabinoid signaling	HMDB0007975;LMGP01010601;PW_C004024	M+H	C42H78NO8P	7.2915	代谢途径;甘油磷脂代谢;花生四烯酸代谢;亚油酸代谢;α-亚麻酸代谢;癌症的胆碱代谢;逆行内源性大麻素信号传导	C00157	pos	Lipids	Phospholipids	Metabolism;Metabolism;Metabolism;Metabolism;Metabolism;Human Diseases;Organismal Systems	Global and overview maps;Lipid metabolism;Lipid metabolism;Lipid metabolism;Lipid metabolism;Cancer: overview;Nervous system	Lipids and lipid-like molecules	Glycerophospholipids	756.552	0.0118096116129	0	82.9	-2.72256	-	Glycerophosphocholines	7.14	7.065	7.082	6.955	7.211	7.094	7.327	7.039	7.023	7.145	7.121	7.113	7.009	7.09	7.05	7.183	6.982	7.095	7.22	7.145	7.086	6.934	7.117
pos_5528	DG(18:2(9Z,12Z)/20:5(5Z,8Z,11Z,14Z,17Z)/0:0)	-	metab_5436	B(ii)	map05214;map05167;map05143;map05163;map05146;map04915;map04015;map04014;map04659;map04658;map04270;map04012;map05231;map04650;map04370;map04371;map04072;map04071;map05235;map04921;map05415;map04750;map04919;map04933;map04961;map05012;map04920;map04923;map04925;map05017;map04926;map05171;map04726;map04725;map04724;map04723;map04728;map05223;map04720;map04666;map05170;map04664;map04540;map04662;map…	Glioma;Kaposi sarcoma-associated herpesvirus infection;African trypanosomiasis;Human cytomegalovirus infection;Amoebiasis;Estrogen signaling pathway;Rap1 signaling pathway;Ras signaling pathway;Th17 cell differentiation;Th1 and Th2 cell differentiation;Vascular smooth muscle contraction;ErbB signaling pathway;Choline metabolism in cancer;Natural killer cell mediated cytotoxicity;VEGF signaling pa…	HMDB0007259;PW_C003310	M+NH4	C41H66O5	7.2808	胶质瘤;卡波西肉瘤相关疱疹病毒感染;非洲锥虫病;人巨细胞病毒感染;阿米巴病;雌激素信号通路;Rap1信号通路;Ras信号通路;Th17细胞分化;Th1和Th2细胞分化;血管平滑肌收缩;ErbB信号通路;癌症的胆碱代谢;自然杀伤细胞介导的细胞毒性;VEGF信号通路;Apelin信号通路;磷脂酶D信号通路;鞘脂信号通路;癌症中PD-L1的表达和PD-1检查点通路;催产素信号通路;糖尿病性心肌病;TRP通道的炎症介质调节;甲状腺激素信号通路;糖尿病并发症中的AGE-RAGE信号通路;内分泌和其他因子调节钙重吸收;帕金森病;脂肪细胞因子信号通路;脂肪细胞脂解的调控;醛固酮的合成和分泌;脊髓小脑共济失调;松弛素信号通路;冠状病毒疾病-新冠肺炎;5-羟色胺能突触;胆碱能突触;谷氨酸能突触;逆行内源性大麻素信号传导;多巴胺能突触;非小细胞肺癌;长期增益效应;Fc-γR-介导的吞噬作用;人类免疫缺陷病毒…	C00165	pos	-	-	Human Diseases;Human Diseases;Human Diseases;Human Diseases;Human Diseases;Organismal Systems;Environmental Information Processing;Environmental Information Processing;Organismal Systems;Organismal Systems;Organismal Systems;Environmental Information Processing;Human Diseases;Organismal Systems;Environmental Information Processing;Environmental Information Processing;Environmental Information Pro…	Cancer: specific types;Infectious disease: viral;Infectious disease: parasitic;Infectious disease: viral;Infectious disease: parasitic;Endocrine system;Signal transduction;Signal transduction;Immune system;Immune system;Circulatory system;Signal transduction;Cancer: overview;Immune system;Signal transduction;Signal transduction;Signal transduction;Signal transduction;Cancer: overview;Endocrine sy…	Lipids and lipid-like molecules	Glycerolipids	656.523	0.0206803008888	0	43.3	-2.3345	-	Diradylglycerols	5.232	5.085	5.141	5.389	5.564	5.36	5.33	5.471	4.802	5.238	5.555	5.429	5.59	5.258	5.529	5.517	5.263	5.797	5.494	5.786	5.448	5.811	5.142
pos_5548	Cytochalasin B	细胞松弛素B	metab_5458	B(ii)	-	-	LMPK11000002;HMDB0250718	M+NH4	C29H37NO5	7.2542	-	C19954	pos	-	-	-	-	Alkaloids and derivatives	Cytochalasans	497.305	0.108444	0	73.5	8.73250511594547	14930-96-2	Cytochalasins	5.458	5.558	5.496	5.435	5.38	5.429	5.296	5.47	5.537	5.482	5.478	5.486	5.49	5.5	5.618	5.509	5.51	5.463	5.624	5.573	5.41	5.583	5.461
pos_5558	2-Hydroxypropyl 2-isopropyl-5-methylcyclohexyl carbonate	2-羟丙基-2-异丙基-5-甲基环己基碳酸酯	metab_5469	B(ii)	-	-	HMDB0059946	M+H	C14H26O4	7.2489	-	-	pos	-	-	-	-	Lipids and lipid-like molecules	Prenol lipids	259.19	0.0137444247846	0	35.6	-1.61206	-	Monoterpenoids	5.342	5.368	5.356	5.277	5.339	5.329	5.233	5.319	5.353	5.388	5.349	5.375	5.322	5.384	5.428	5.361	5.346	5.305	5.476	5.417	5.319	5.351	5.393
pos_5565	Dactimicin	达地米星	metab_5477	B(ii)	-	-	HMDB0250824	M+H-H2O	C18H36N6O6	7.2436	-	C17979	pos	-	-	-	-	Organic oxygen compounds	Organooxygen compounds	415.266	0.0117914487328	0	38.7	-1.48884	73196-97-1	Carbohydrates and carbohydrate conjugates	7.077	7.065	7.067	7.008	7.031	7.056	7.044	7.022	7.05	7.066	7.042	7.056	7.051	7.055	7.087	7.06	7.036	7.013	7.22	7.102	7.029	7.038	7.051
pos_557	Mepartricin	甲帕霉素	metab_5482	B(ii)	-	-	HMDB0253564;HMDB0254450;HMDB0254449	M+H+Na, M+2Na	C60H88N2O19	4.9671	-	-	pos	-	-	-	-	Organic oxygen compounds	Organooxygen compounds	582.292	0.0434181938292	0	87.9	-9.2989	-	Carbohydrates and carbohydrate conjugates	8.06	8.086	8.107	8.078	8.102	8.1	8.109	8.181	8.001	7.916	8.162	8.077	8.12	8.125	8.13	8.171	8.22	8.074	8.083	8.3	8.164	8.138	8.13
pos_5572	DG(20:1(11Z)/16:1(9Z)/0:0)	-	metab_5485	B(ii)	map05214;map05167;map05143;map05163;map05146;map04915;map04015;map04014;map04659;map04658;map04270;map04012;map05231;map04650;map04370;map04371;map04072;map04071;map05235;map04921;map05415;map04750;map04919;map04933;map04961;map05012;map04920;map04923;map04925;map05017;map04926;map05171;map04726;map04725;map04724;map04723;map04728;map05223;map04720;map04666;map05170;map04664;map04540;map04662;map…	Glioma;Kaposi sarcoma-associated herpesvirus infection;African trypanosomiasis;Human cytomegalovirus infection;Amoebiasis;Estrogen signaling pathway;Rap1 signaling pathway;Ras signaling pathway;Th17 cell differentiation;Th1 and Th2 cell differentiation;Vascular smooth muscle contraction;ErbB signaling pathway;Choline metabolism in cancer;Natural killer cell mediated cytotoxicity;VEGF signaling pa…	PW_C003440;HMDB0007389	M+Na	C39H72O5	7.2383	胶质瘤;卡波西肉瘤相关疱疹病毒感染;非洲锥虫病;人巨细胞病毒感染;阿米巴病;雌激素信号通路;Rap1信号通路;Ras信号通路;Th17细胞分化;Th1和Th2细胞分化;血管平滑肌收缩;ErbB信号通路;癌症的胆碱代谢;自然杀伤细胞介导的细胞毒性;VEGF信号通路;Apelin信号通路;磷脂酶D信号通路;鞘脂信号通路;癌症中PD-L1的表达和PD-1检查点通路;催产素信号通路;糖尿病性心肌病;TRP通道的炎症介质调节;甲状腺激素信号通路;糖尿病并发症中的AGE-RAGE信号通路;内分泌和其他因子调节钙重吸收;帕金森病;脂肪细胞因子信号通路;脂肪细胞脂解的调控;醛固酮的合成和分泌;脊髓小脑共济失调;松弛素信号通路;冠状病毒疾病-新冠肺炎;5-羟色胺能突触;胆碱能突触;谷氨酸能突触;逆行内源性大麻素信号传导;多巴胺能突触;非小细胞肺癌;长期增益效应;Fc-γR-介导的吞噬作用;人类免疫缺陷病毒…	C00165	pos	-	-	Human Diseases;Human Diseases;Human Diseases;Human Diseases;Human Diseases;Organismal Systems;Environmental Information Processing;Environmental Information Processing;Organismal Systems;Organismal Systems;Organismal Systems;Environmental Information Processing;Human Diseases;Organismal Systems;Environmental Information Processing;Environmental Information Processing;Environmental Information Pro…	Cancer: specific types;Infectious disease: viral;Infectious disease: parasitic;Infectious disease: viral;Infectious disease: parasitic;Endocrine system;Signal transduction;Signal transduction;Immune system;Immune system;Circulatory system;Signal transduction;Cancer: overview;Immune system;Signal transduction;Signal transduction;Signal transduction;Signal transduction;Cancer: overview;Endocrine sy…	Lipids and lipid-like molecules	Glycerolipids	643.526	0.0289314122858	0	36.7	-1.6385	-	Diradylglycerols	5.884	5.951	5.911	5.854	5.839	5.885	5.634	5.913	5.99	5.969	5.913	5.982	5.982	5.969	6.045	5.936	5.987	5.936	6.075	6.045	5.848	6.023	5.935
pos_5580	N-Eicosapentaenoyl Arginine	N -二十碳五烯酰基精氨酸	metab_5494	B(ii)	-	-	HMDB0242065	M+H	C26H42N4O3	7.217	-	-	pos	-	-	-	-	Not Available	Not Available	459.329	0.00593014737251	0	60.5	-8.97449	-	Not Available	5.85	5.857	5.854	5.76	5.807	5.827	5.735	5.823	5.83	5.858	5.842	5.825	5.82	5.846	5.884	5.844	5.832	5.789	5.984	5.907	5.805	5.849	5.853
pos_5582	GPCho(14:0/20:4)	-	metab_5496	B(i)	map01100;map00564;map00590;map00591;map00592;map05231;map04723	Metabolic pathways;Glycerophospholipid metabolism;Arachidonic acid metabolism;Linoleic acid metabolism;alpha-Linolenic acid metabolism;Choline metabolism in cancer;Retrograde endocannabinoid signaling	HMDB0007884;HMDB0007883	M+Na	C42H76NO8P	7.2011	代谢途径;甘油磷脂代谢;花生四烯酸代谢;亚油酸代谢;α-亚麻酸代谢;癌症的胆碱代谢;逆行内源性大麻素信号传导	C00157	pos	Lipids	Phospholipids	Metabolism;Metabolism;Metabolism;Metabolism;Metabolism;Human Diseases;Organismal Systems	Global and overview maps;Lipid metabolism;Lipid metabolism;Lipid metabolism;Lipid metabolism;Cancer: overview;Nervous system	Lipids and lipid-like molecules	Glycerophospholipids	776.519	0.161572	95.3	0	-1.63001	-	Glycerophosphocholines	6.169	6.213	6.185	6.009	6.29	6.181	6.416	6.048	5.78	6.041	6.208	5.979	6.146	5.903	5.877	6.065	6.038	6.154	6.049	6.126	6.191	6.055	6.118
pos_5585	SM(d15:1/26:1)	-	metab_5499	B(i)	-	-	-	M+H	C46H91N2O6P	7.1958	-	-	pos	-	-	-	-	-	-	799.667	0.104592	43.4	0	-2.01552	-	-	2.021	5.937	6.218	6.205	6.118	6.177	5.95	6.078	6.323	6.113	5.962	5.906	5.84	5.957	2.016	5.982	6.096	6.162	6.026	5.842	5.839	6.026	5.953
pos_5598	Taurocholic Acid	牛磺胆酸	metab_5513	B(i)	map01100;map04979;map04976;map00120;map00430	Metabolic pathways;Cholesterol metabolism;Bile secretion;Primary bile acid biosynthesis;Taurine and hypotaurine metabolism	PW_C000025;LMST05040001;HMDB0000036;MJDBOTE0000483	M+NH4	C26H45NO7S	7.1746	代谢途径;胆固醇代谢;胆汁分泌;初级胆汁酸生物合成;牛磺酸和亚牛磺酸代谢	C05122	pos	Steroids	24-Carbon atoms	Metabolism;Organismal Systems;Organismal Systems;Metabolism;Metabolism	Global and overview maps;Digestive system;Digestive system;Lipid metabolism;Metabolism of other amino acids	Lipids and lipid-like molecules	Steroids and steroid derivatives	533.324	0.0683033681089	97	0	-1.95736	81-24-3	Bile acids, alcohols and derivatives	3.821	5.396	4.561	2.552	5.047	4.852	5.093	4.207	5.244	4.362	4.572	4.437	5.302	4.031	4.884	4.313	5.32	5.148	4.901	5.257	5.87	6.463	5.233
pos_5603	Tsangane L 3-glucoside	-	metab_5520	B(ii)	-	-	HMDB0040824	M+H-H2O	C19H34O7	7.1746	-	-	pos	-	-	-	-	Lipids and lipid-like molecules	Prenol lipids	357.224	0.0285984	0	42.6	-8.43225	143775-68-2	Terpene glycosides	6.721	6.709	6.718	6.656	6.677	6.701	6.69	6.665	6.698	6.718	6.686	6.7	6.692	6.699	6.728	6.702	6.677	6.652	6.857	6.742	6.676	6.684	6.688
pos_5610	Octylamine	辛胺	metab_5528	B(ii)	-	-	HMDB0255916	M+H	C8H19N	7.1693	-	C01740	pos	-	-	-	-	Organic nitrogen compounds	Organonitrogen compounds	130.159	0.0454943648682	0	41.1	-1.29708	111-86-4	Amines	5.763	5.765	5.757	5.693	5.728	5.752	5.653	5.739	5.756	5.776	5.74	5.756	5.721	5.757	5.783	5.753	5.748	5.696	5.897	5.802	5.692	5.768	5.745
pos_5611	4,4'-Dioctyldiphenylamine	4，4 ' -二辛基二苯胺	metab_5529	B(i)	-	-	-	M+H	C28H43N	7.164	-	-	pos	-	-	-	-	-	-	394.346	0.0190739110113	80.5	0	-1.7801	-	-	6.609	6.611	6.622	6.561	6.577	6.613	6.581	6.585	6.603	6.605	6.594	6.596	6.606	6.599	6.614	6.584	6.592	6.576	6.726	6.622	6.571	6.58	6.596
pos_5613	Butylisopropylamine	丁基异丙胺	metab_5531	B(i)	-	-	-	M+H	C7H17N	7.164	-	-	pos	-	-	-	-	-	-	116.143	0.0452693484767	85.4	0	-1.19652	-	-	5.853	5.857	5.849	5.789	5.825	5.843	5.758	5.829	5.851	5.865	5.829	5.849	5.821	5.847	5.866	5.832	5.828	5.78	5.988	5.888	5.788	5.835	5.836
pos_5618	Oxymetazoline	羟间唑啉	metab_5536	B(ii)	-	-	HMDB0015070	M+Na	C16H24N2O	7.1481	-	C07363	pos	-	-	-	-	Benzenoids	Benzene and substituted derivatives	283.18	0.0440924014374	0	33.3	8.97353165830028	1491-59-4	Xylenes	5.828	5.769	5.798	5.721	5.732	5.793	5.783	5.764	5.752	5.792	5.757	5.791	5.787	5.803	5.839	5.805	5.762	5.754	5.976	5.843	5.778	5.779	5.797
pos_5619	LysoPC(22:2(13Z,16Z)/0:0)	-	metab_5537	B(ii)	map00564;map05231	Glycerophospholipid metabolism;Choline metabolism in cancer	HMDB0010400	M+ACN+Na	C30H58NO7P	7.1428	甘油磷脂代谢;癌症的胆碱代谢	C04230	pos	Lipids	Phospholipids	Metabolism;Human Diseases	Lipid metabolism;Cancer: overview	Lipids and lipid-like molecules	Glycerophospholipids	639.407	0.0444814461565	0	54.6	-7.22609	-	Glycerophosphocholines	6.025	6.041	6.07	5.973	5.994	6.04	5.932	6.021	6.092	6.072	6.049	6.081	6.073	6.104	6.088	6.041	6.084	6	6.214	6.126	6.004	6.12	6.048
pos_5620	DG(8:0/20:5(7Z,9Z,11E,13E,17Z)-3OH(5,6,15)/0:0)	-	metab_5539	B(ii)	-	-	HMDB0297203	M+H	C31H50O8	7.1428	-	-	pos	-	-	-	-	Not Available	Not Available	551.354	0.0712661904803	0	31	-6.26489	-	Not Available	5.567	5.622	5.573	5.535	5.513	5.548	5.515	5.573	5.587	5.619	5.531	5.564	5.59	5.589	5.598	5.595	5.569	5.533	5.754	5.663	5.551	5.647	5.56
pos_5622	Cucurbic acid	西葫芦酸	metab_5541	B(ii)	-	-	HMDB0029388	M+CH3OH+H	C12H20O3	7.1428	-	C08482	pos	-	-	-	-	Lipids and lipid-like molecules	Fatty Acyls	245.174	0.0528760726129	0	62.8	-1.85777	58240-50-9	Lineolic acids and derivatives	5.23	5.265	5.27	5.203	5.198	5.239	5.178	5.24	5.212	5.254	5.233	5.298	5.271	5.305	5.269	5.267	5.239	5.222	5.379	5.314	5.243	5.275	5.268
pos_5627	Acetamide, 2-(diethylamino)-N-(2-(octyloxy)phenyl)-	乙酰胺，2-（二乙氨基）-N-（2-（辛氧基）苯基）-	metab_5546	B(ii)	-	-	HMDB0247710	M+H-H2O	C20H34N2O2	7.1375	-	-	pos	-	-	-	-	Organic acids and derivatives	Carboxylic acids and derivatives	317.259	0.0864347427786	0	44.1	-0.377016	-	Amino acids, peptides, and analogues	5.268	5.248	5.256	5.228	5.255	5.238	5.23	5.218	5.223	5.271	5.245	5.256	5.227	5.258	5.278	5.252	5.231	5.233	5.389	5.279	5.257	5.251	5.25
pos_5633	Amylamine	戊胺	metab_5553	B(ii)	-	-	HMDB0248371	M+H	C5H13N	7.1269	-	-	pos	-	-	-	-	Organic nitrogen compounds	Organonitrogen compounds	88.112	0.0145266892885	0	51	-1.12055	-	Amines	6.873	6.861	6.865	6.809	6.834	6.86	6.846	6.816	6.846	6.867	6.841	6.849	6.849	6.849	6.875	6.851	6.833	6.817	6.996	6.887	6.836	6.835	6.848
pos_5634	Isoleucyl-prolyl-proline	异白氨酰-脯氨酰-脯氨酸	metab_5554	B(ii)	-	-	HMDB0253021	M+NH4	C16H27N3O4	7.1216	-	-	pos	-	-	-	-	Organic acids and derivatives	Carboxylic acids and derivatives	343.237	0.0156775152966	0	57.9	9.741047496853913	-	Amino acids, peptides, and analogues	5.441	5.425	5.404	5.375	5.374	5.414	5.443	5.382	5.374	5.421	5.354	5.385	5.421	5.393	5.441	5.419	5.348	5.356	5.574	5.425	5.38	5.378	5.402
pos_5635	Hexylamine	己胺	metab_5555	B(ii)	-	-	HMDB0032323	M+H	C6H15N	7.1216	-	C08306	pos	-	-	-	-	Organic nitrogen compounds	Organonitrogen compounds	102.127	0.0120521170264	0	74.5	-2.24373	111-26-2	Amines	7.153	7.133	7.144	7.086	7.102	7.139	7.148	7.071	7.111	7.141	7.114	7.118	7.126	7.118	7.144	7.127	7.096	7.099	7.281	7.16	7.126	7.089	7.12
pos_5659	Levetiracetam	左乙拉西坦	metab_5581	B(ii)	-	-	HMDB0015333;HMDB0252105	2M+H	C8H14N2O2	7.0684	-	C07841	pos	-	-	-	-	Organic acids and derivatives	Carboxylic acids and derivatives	341.221	0.0482992819926	0	38.8	6.98507082014261	102767-28-2	Amino acids, peptides, and analogues	5.907	5.865	5.887	5.816	5.817	5.867	5.906	5.837	5.838	5.893	5.842	5.861	5.88	5.892	5.89	5.875	5.818	5.812	6.074	5.907	5.863	5.829	5.861
pos_5660	GPEtn(16:1/22:5)	-	metab_5583	B(i)	map01100;map00564;map00563;map04136;map05167;map04723;map04140	Metabolic pathways;Glycerophospholipid metabolism;Glycosylphosphatidylinositol (GPI)-anchor biosynthesis;Autophagy - other;Kaposi sarcoma-associated herpesvirus infection;Retrograde endocannabinoid signaling;Autophagy - animal	HMDB0011360;HMDB0008977;HMDB0008978;HMDB0011359	M+H	C43H74NO8P	7.0631	代谢途径;甘油磷脂代谢;糖基磷脂酰肌醇（GPI）-锚定生物合成;自噬-其他;卡波西肉瘤相关疱疹病毒感染;逆行内源性大麻素信号传导;自噬-动物	C00350	pos	Lipids	Phospholipids	Metabolism;Metabolism;Metabolism;Cellular Processes;Human Diseases;Organismal Systems;Cellular Processes	Global and overview maps;Lipid metabolism;Glycan biosynthesis and metabolism;Transport and catabolism;Infectious disease: viral;Nervous system;Transport and catabolism	Lipids and lipid-like molecules	Glycerophospholipids	764.523	0.113563	96.2	0	0.462860212197484	-	Glycerophosphoethanolamines	5.379	5.069	5.17	5.411	5.261	5.326	5.568	5.168	5.205	5.263	5.66	5.46	5.22	5.762	4.887	4.638	5.313	4.636	5.165	4.928	5.323	4.954	5.543
pos_5669	3,5,5-Trimethyl-2-cyclohexen-1-one	3，5，5 -三甲基- 2 -环己烯- 1 -酮	metab_5592	B(ii)	-	-	HMDB0031195	M+NH4	C9H14O	7.0578	-	C14743	pos	-	-	-	-	Organic oxygen compounds	Organooxygen compounds	156.138	0.0110756449549	0	63.3	-1.72937	78-59-1	Carbonyl compounds	6.195	6.18	6.19	6.144	6.163	6.186	6.201	6.132	6.167	6.18	6.158	6.164	6.18	6.158	6.187	6.165	6.153	6.153	6.311	6.194	6.165	6.141	6.16
pos_5670	Bufadienolide	蟾蜍二烯羟酸内酯	metab_5594	B(ii)	-	-	HMDB0249427	M+NH4	C24H34O2	7.0525	-	C16921	pos	-	-	-	-	Lipids and lipid-like molecules	Steroids and steroid derivatives	372.293	0.0388603803736	0	39.5	8.78057884945196	29565-35-3	Steroid lactones	5.591	5.464	5.655	5.685	5.57	5.697	5.178	5.228	5.306	5.447	5.177	5.215	5.093	5.175	4.956	5.272	5.236	4.941	5.251	4.814	5.422	5.186	5.133
pos_5672	3-Hexen-1-ol	叶醇	metab_5596	B(ii)	map00592	alpha-Linolenic acid metabolism	HMDB0302313;HMDB0030003;HMDB0302264	M+ACN+H	C6H12O	7.0525	α-亚麻酸代谢	C08492	pos	-	-	Metabolism	Lipid metabolism	Lipids and lipid-like molecules	Fatty Acyls	142.122	0.0266313494279	0	45	-2.05667	928-96-1	Fatty alcohols	5.396	5.381	5.392	5.346	5.361	5.401	5.406	5.341	5.369	5.382	5.357	5.361	5.372	5.375	5.391	5.368	5.335	5.338	5.521	5.407	5.368	5.332	5.376
pos_5673	N-Arachidonoyl Histidine	N -花生四烯酰组氨酸	metab_5597	B(ii)	-	-	LMFA08020131;HMDB0241996	M+NH4	C26H39N3O3	7.0472	-	-	pos	-	-	-	-	Organic acids and derivatives	Carboxylic acids and derivatives	459.329	0.0382915898445	0	44.4	-9.23925	-	Amino acids, peptides, and analogues	5.882	5.862	5.893	5.79	5.823	5.885	5.88	5.823	5.823	5.868	5.843	5.856	5.867	5.858	5.881	5.868	5.826	5.805	6.022	5.894	5.853	5.834	5.828
pos_5700	Astromicin	阿司霉素	metab_5625	B(ii)	-	-	HMDB0248678	M+ACN+Na	C17H35N5O6	7.0259	-	C17708	pos	-	-	-	-	Organic oxygen compounds	Organooxygen compounds	469.274	0.262014	0	65.5	-2.26674	55779-06-1	Carbohydrates and carbohydrate conjugates	5.178	5.173	5.134	5.063	5.016	5.174	5.149	5.064	5.027	5.143	5.077	5.003	5.129	5.068	5.103	5.129	5.015	5.085	5.295	5.103	5.081	5.072	5.08
pos_5702	LysoPA(20:4(8Z,11Z,14Z,17Z)/0:0)	-	metab_5627	B(ii)	-	-	HMDB0114742	M+H-H2O	C23H39O7P	7.0259	-	-	pos	-	-	-	-	Lipids and lipid-like molecules	Glycerophospholipids	441.241	0.187887	0	61.5	2.96336848595948	-	Glycerophosphates	5.536	5.475	5.445	5.417	5.466	5.513	5.508	5.312	5.295	5.557	5.446	5.331	5.456	5.465	5.394	5.469	5.361	5.323	5.637	5.459	5.392	5.426	5.543
pos_5714	PC(18:2(9Z,12Z)/18:0)	-	metab_5640	B(ii)	map01100;map00564;map00590;map00591;map00592;map05231;map04723	Metabolic pathways;Glycerophospholipid metabolism;Arachidonic acid metabolism;Linoleic acid metabolism;alpha-Linolenic acid metabolism;Choline metabolism in cancer;Retrograde endocannabinoid signaling	LMGP01010935;HMDB0008135;PW_C004183	M+H	C44H84NO8P	7.0099	代谢途径;甘油磷脂代谢;花生四烯酸代谢;亚油酸代谢;α-亚麻酸代谢;癌症的胆碱代谢;逆行内源性大麻素信号传导	C00157	pos	Lipids	Phospholipids	Metabolism;Metabolism;Metabolism;Metabolism;Metabolism;Human Diseases;Organismal Systems	Global and overview maps;Lipid metabolism;Lipid metabolism;Lipid metabolism;Lipid metabolism;Cancer: overview;Nervous system	Lipids and lipid-like molecules	Glycerophospholipids	786.599	0.0470391	0	69.9	-2.31071	-	Glycerophosphocholines	8.566	8.587	8.584	8.573	8.557	8.534	8.584	8.556	8.616	8.556	8.595	8.566	8.546	8.543	8.563	8.572	8.557	8.507	8.645	8.607	8.524	8.552	8.544
pos_572	(4S,8R)-8,9-Dihydroxy-p-menth-1(6)-en-2-one	（4S，8R）-8,9-二羟基-p-menth-1（6）-en-2-酮	metab_5646	B(ii)	-	-	HMDB0039052	M+H-H2O, M+H	C10H16O3	5.1481	-	-	pos	-	-	-	-	Lipids and lipid-like molecules	Prenol lipids	167.106	0.151489	0	64.4	-1.16715	402593-42-4	Monoterpenoids	4.032	3.895	3.797	3.8	3.95	3.97	3.84	3.936	3.774	3.758	4.163	4.152	3.946	4.182	4.128	4.111	3.977	3.988	4.084	4.145	3.816	4.021	3.913
pos_5726	CL(a-13:0/a-25:0/i-19:0/i-21:0)[rac]	-	metab_5651	B(ii)	-	-	HMDB0075361	M+2Na	C87H170O17P2	6.978	-	-	pos	-	-	-	-	Lipids and lipid-like molecules	Glycerophospholipids	797.588	0.0237836788909	0	31.4	4.03517417898625	-	Glycerophosphoglycerophosphoglycerols	6.648	6.671	6.607	6.669	6.634	6.561	6.616	6.57	6.68	6.553	6.646	6.589	6.62	6.553	6.611	6.611	6.6	6.602	6.66	6.641	6.572	6.628	6.593
pos_5766	Tensin	张力蛋白	metab_5692	B(ii)	-	-	HMDB0258820	M+2H	C67H116N12O20	6.8875	-	-	pos	-	-	-	-	Organic acids and derivatives	Peptidomimetics	705.43	0.0556455743371	0	35.3	1.67534921226934	-	Depsipeptides	5.827	5.97	6.017	5.967	5.859	5.927	5.252	5.73	5.797	5.999	5.916	5.895	5.836	5.987	5.906	5.743	5.774	5.885	5.44	5.64	5.812	5.897	6.053
pos_5776	Azacyclotridec-1-en-2-amine, N-(2-phenylcyclopentyl)-, cis-	氮杂环十三碳-1-烯-2-胺，N-（2-苯基环戊基）-，顺式-	metab_5703	B(ii)	-	-	HMDB0254374	2M+ACN+Na	C23H36N2	6.8716	-	-	pos	-	-	-	-	Benzenoids	Benzene and substituted derivatives	744.589	0.0743027782104	0	51.9	-3.92799	-	Not Available	6.304	6.385	6.369	6.384	6.339	6.255	6.385	6.284	6.38	6.238	6.324	6.324	6.281	6.318	6.29	6.291	6.331	6.265	6.311	6.359	6.171	6.302	6.143
pos_5789	SM(d16:1/24:1)	-	metab_5717	B(i)	-	-	LMSP03010071	M+H	C45H89N2O6P	6.8557	-	-	pos	-	-	-	-	-	-	785.65	0.0995667794944	45.3	0	-3.67778	-	-	5.599	6.078	6.344	6.316	6.201	6.31	6.223	5.981	6.342	6.438	6.352	6.155	6.193	6.216	5.568	6.238	6.19	6.347	6.354	6.288	6.29	6.128	6.097
pos_5800	2-O-ethyl PAF C-16	2-O-乙基PAFC-16	metab_5731	B(i)	-	-	-	M+H	C26H56NO6P	6.845	-	-	pos	-	-	-	-	-	-	510.391	0.0905623813725	55.7	0	-1.59333	-	-	6.072	6.01	6.15	5.966	5.964	6.057	6.011	5.811	6.002	6.166	6.064	6.08	5.978	6.239	6.001	6.006	5.997	5.814	6.283	5.93	5.949	5.864	6.207
pos_5816	PA(14:1(9Z)/20:3(8Z,11Z,14Z)-2OH(5,6))	-	metab_5748	B(ii)	-	-	HMDB0263100	M+H-H2O	C37H65O10P	6.829	-	-	pos	-	-	-	-	Not Available	Not Available	683.432	0.0748077644965	0	58.7	5.020965531511191	-	Not Available	5.658	5.713	5.741	5.614	5.609	5.627	5.712	5.485	5.586	5.641	5.679	5.556	5.669	5.595	5.572	5.688	5.665	5.589	5.763	5.767	5.603	5.536	5.554
pos_5817	Mono-isopropyl-disopyramide	-	metab_5749	B(ii)	-	-	HMDB0061024	2M+H	C18H23N3O	6.829	-	-	pos	-	-	-	-	Organic acids and derivatives	Carboxylic acids and derivatives	595.38	0.10466	0	40.4	7.56564329976997	-	Amino acids, peptides, and analogues	5.739	5.763	5.76	5.691	5.651	5.69	5.771	5.551	5.666	5.739	5.739	5.65	5.678	5.661	5.66	5.745	5.733	5.671	5.839	5.841	5.671	5.642	5.615
pos_582	PS(22:6(4Z,7Z,10Z,13Z,16Z,19Z)/19:0)	-	metab_5752	B(ii)	-	-	HMDB0256888;LMGP03010833	M+H+Na, M+2Na	C47H80NO10P	5.2922	-	-	pos	-	-	-	-	Lipids and lipid-like molecules	Glycerophospholipids	436.774	0.0381335766504	0	37.2	-0.0220348	-	Glycerophosphoserines	5.317	5.412	5.342	5.485	5.342	5.398	5.043	5.394	5.426	5.401	5.393	5.375	5.376	5.392	5.401	5.359	5.358	5.574	4.272	5.2	5.331	5.398	5.396
pos_5836	1-(Carboxyethylthio)tetradecane	1-（羧乙基硫代）十四烷	metab_5770	B(ii)	-	-	HMDB0243801	M+ACN+H	C17H34O2S	6.8238	-	-	pos	-	-	-	-	Lipids and lipid-like molecules	Fatty Acyls	344.261	0.0195010127842	0	38	-2.04794	-	Fatty acids and conjugates	5.348	5.239	5.416	5.457	5.315	5.415	4.972	4.953	5.03	5.258	4.996	4.934	4.878	4.982	4.79	5.004	5.144	4.762	5.021	4.653	5.22	4.951	4.913
pos_5891	Apo-14'-zeaxanthinal	Apo-14'-玉米黄质	metab_5827	B(ii)	-	-	HMDB0302024	M+NH4	C22H30O2	6.7378	-	-	pos	-	-	-	-	Lipids and lipid-like molecules	Prenol lipids	344.261	0.0351008620172	0	36.1	8.31385734953139	-	Diterpenoids	5.211	5.094	5.3	5.215	5.064	5.242	4.734	4.717	4.838	5.079	4.872	4.789	4.76	4.771	4.546	4.931	4.858	4.478	4.886	4.597	5.108	4.713	4.626
pos_5892	PC(22:5(7Z,10Z,13Z,16Z,19Z)/18:0)	-	metab_5828	B(ii)	map01100;map00564;map00590;map00591;map00592;map05231;map04723	Metabolic pathways;Glycerophospholipid metabolism;Arachidonic acid metabolism;Linoleic acid metabolism;alpha-Linolenic acid metabolism;Choline metabolism in cancer;Retrograde endocannabinoid signaling	PW_C004742;HMDB0008694	M+H	C48H86NO8P	6.7325	代谢途径;甘油磷脂代谢;花生四烯酸代谢;亚油酸代谢;α-亚麻酸代谢;癌症的胆碱代谢;逆行内源性大麻素信号传导	C00157	pos	Lipids	Phospholipids	Metabolism;Metabolism;Metabolism;Metabolism;Metabolism;Human Diseases;Organismal Systems	Global and overview maps;Lipid metabolism;Lipid metabolism;Lipid metabolism;Lipid metabolism;Cancer: overview;Nervous system	Lipids and lipid-like molecules	Glycerophospholipids	836.614	0.244546	0	43.7	-2.95948	-	Glycerophosphocholines	7.295	7.349	7.28	7.196	7.267	7.33	7.316	7.384	7.319	7.215	7.227	7.332	7.4	7.318	7.294	7.208	7.341	7.269	7.429	7.323	7.214	7.236	7.234
pos_590	PE(20:4(8Z,11Z,14Z,17Z)-2OH(5S,6R)/DiMe(13,5))	-	metab_5837	B(ii)	-	-	HMDB0284933	M+H+Na, M+2Na	C49H84NO11P	5.3508	-	-	pos	-	-	-	-	Not Available	Not Available	458.787	0.0245877063197	0	37.8	-0.37232	-	Not Available	5.173	5.26	5.169	5.349	5.161	5.212	4.88	5.237	5.254	5.193	5.236	5.19	5.174	5.213	5.223	5.177	5.213	5.421	4.034	4.982	5.18	5.223	5.206
pos_5917	Ubiquinone-8	-	metab_5856	B(ii)	-	-	HMDB0304524	M+ACN+H	C49H74O4	6.7058	-	C17569	pos	-	-	-	-	Lipids and lipid-like molecules	Prenol lipids	768.588	0.253595	0	51.7	-6.1471	2394-68-5	Quinone and hydroquinone lipids	7.119	7.126	7.175	7.041	7.055	7.052	7.117	7.009	7.103	7.108	7.109	7.039	7.102	7.077	7.134	7.079	7.067	7.047	7.123	7.182	6.978	7.098	6.938
pos_5924	Ubiquinol-8	-	metab_5864	B(ii)	-	-	HMDB0304523;HMDB0001060	M+ACN+Na	C49H78O4	6.7005	-	-	pos	-	-	-	-	Lipids and lipid-like molecules	Prenol lipids	794.604	0.248511	0	32.1	-2.6114	74075-00-6	Polyterpenoids	7.023	7.035	7.063	6.936	6.964	6.957	7.01	6.95	6.994	7.035	6.995	6.997	7.015	6.945	7.035	6.965	6.978	6.99	7.046	7.115	6.88	7.016	6.864
pos_5926	PC(18:1(9Z)/15:0)	-	metab_5866	B(ii)	map01100;map00564;map00590;map00591;map00592;map05231;map04723	Metabolic pathways;Glycerophospholipid metabolism;Arachidonic acid metabolism;Linoleic acid metabolism;alpha-Linolenic acid metabolism;Choline metabolism in cancer;Retrograde endocannabinoid signaling	LMGP01011598;HMDB0008099;PW_C004148	M+H	C41H80NO8P	6.7005	代谢途径;甘油磷脂代谢;花生四烯酸代谢;亚油酸代谢;α-亚麻酸代谢;癌症的胆碱代谢;逆行内源性大麻素信号传导	C00157	pos	Lipids	Phospholipids	Metabolism;Metabolism;Metabolism;Metabolism;Metabolism;Human Diseases;Organismal Systems	Global and overview maps;Lipid metabolism;Lipid metabolism;Lipid metabolism;Lipid metabolism;Cancer: overview;Nervous system	Lipids and lipid-like molecules	Glycerophospholipids	746.569	0.138638	0	39.9	-1.04275	-	Glycerophosphocholines	6.398	6.363	6.272	6.045	6.244	6.316	6.257	6.412	6.334	6.153	6.35	6.308	6.4	6.117	6.39	6.289	6.461	6.239	6.481	6.44	6.357	6.174	6.023
pos_5943	2-Lysophosphatidylcholine	2 -溶血磷脂酰胆碱	metab_5885	B(ii)	map00564;map05231	Glycerophospholipid metabolism;Choline metabolism in cancer	HMDB0258493	M+H	C26H54NO7P	6.6845	甘油磷脂代谢;癌症的胆碱代谢	C04230	pos	Lipids	Phospholipids	Metabolism;Human Diseases	Lipid metabolism;Cancer: overview	Lipids and lipid-like molecules	Glycerophospholipids	524.37	0.00718144434918	0	91.8	-1.90281	-	Glycerophosphocholines	8.337	8.304	8.37	8.276	8.291	8.334	8.311	8.22	8.284	8.36	8.35	8.314	8.297	8.342	8.316	8.323	8.301	8.217	8.479	8.344	8.3	8.254	8.32
pos_5944	LysoPE(0:0/18:0)	-	metab_5886	B(ii)	-	-	HMDB0011129	M+H	C23H48NO7P	6.6845	-	-	pos	-	-	-	-	Lipids and lipid-like molecules	Glycerophospholipids	482.324	0.0157592677898	0	77.2	-1.1697	899443-67-5	Glycerophosphoethanolamines	6.446	6.394	6.428	6.408	6.374	6.433	6.441	6.425	6.464	6.514	6.522	6.424	6.374	6.43	6.464	6.524	6.444	6.433	6.635	6.473	6.385	6.4	6.386
pos_5948	Nepetaside	假荆芥内酯苷	metab_5890	B(ii)	-	-	HMDB0038149	2M+NH4	C16H26O8	6.6791	-	-	pos	-	-	-	-	Lipids and lipid-like molecules	Prenol lipids	710.362	0.0397126567181	0	53.8	3.72806830902644	114076-56-1	Terpene glycosides	6.607	6.633	6.622	6.613	6.567	6.606	6.248	6.562	6.521	6.559	6.585	6.581	6.625	6.588	6.542	6.528	6.546	6.737	6.435	6.344	6.603	6.559	6.505
pos_5963	2-Pentyl-3-phenyl-2-propenal	2 -戊基- 3 -苯基- 2 -丙烯醛	metab_5907	B(ii)	-	-	HMDB0031313	2M+NH4	C14H18O	6.6578	-	C12288	pos	-	-	-	-	Phenylpropanoids and polyketides	Cinnamaldehydes	422.304	0.153629	0	62.7	-2.57112	122-40-7	Not Available	4.445	4.153	4.268	4.318	4.041	4.386	4.575	4.336	4.048	4.109	4.323	4.249	4.377	4.492	4.344	4.24	4.388	4.345	4.385	4.137	4.236	4.441	3.994
pos_597	5-Megastigmen-7-yne-3,9-diol	5 -巨豆素- 7 -炔- 3，9 -二醇	metab_5914	B(ii)	-	-	HMDB0303806	M+H-H2O, M+H	C13H20O2	5.4415	-	-	pos	-	-	-	-	Organic oxygen compounds	Organooxygen compounds	209.153	0.12198	0	36.8	-1.27849	-	Alcohols and polyols	4.217	3.349	3.998	3.525	4.106	3.93	4.107	4.181	3.736	3.878	4.266	4.23	3.976	4.415	3.584	4.34	4.105	3.833	4.355	3.597	3.912	3.741	4.244
pos_5977	PC(P-18:0/0:0)	-	metab_5921	B(i)	map00564;map05231	Glycerophospholipid metabolism;Choline metabolism in cancer	HMDB0013122;LMGP01070009	M+Na	C26H54NO6P	6.6364	甘油磷脂代谢;癌症的胆碱代谢	C04230	pos	Lipids	Phospholipids	Metabolism;Human Diseases	Lipid metabolism;Cancer: overview	Lipids and lipid-like molecules	Glycerophospholipids	530.357	0.0866306974312	98.3	0	-1.30036	-	Glycerophosphocholines	5.152	5.123	4.981	4.944	4.926	5.055	5.138	4.813	5.06	5.116	4.985	5.011	4.942	4.983	5.038	5.11	4.952	4.969	5.385	5.09	4.973	4.97	5.112
pos_5978	LysoPA(O-18:0/0:0)	-	metab_5922	B(ii)	-	-	HMDB0011144	M+ACN+H	C21H45O6P	6.6364	-	-	pos	-	-	-	-	Lipids and lipid-like molecules	Glycerophospholipids	466.328	0.13085	0	62.1	-2.00109	-	Glycerophosphates	5.112	5.108	5.164	4.929	4.913	5.065	5.398	4.734	5.213	5.299	5.367	5.183	4.894	5.099	5.171	5.159	5.165	4.892	5.243	5.259	4.733	5.156	5.005
pos_5985	Periplocoside A	杠柳苷A	metab_5930	B(ii)	-	-	HMDB0256344	M+H+Na	C72H114O27	6.6311	-	-	pos	-	-	-	-	Lipids and lipid-like molecules	Steroids and steroid derivatives	717.37	0.0227474804807	0	42.4	-8.67924	-	Steroidal glycosides	6.395	6.433	6.333	6.41	6.35	6.376	6.058	6.401	6.394	6.369	6.378	6.381	6.445	6.377	6.368	6.381	6.36	6.601	6.245	6.22	6.423	6.36	6.307
pos_5987	N-Arachidonoyl Leucine	N -花生四烯酰亮氨酸	metab_5932	B(ii)	-	-	HMDB0241998;LMFA08020114	M+Na	C26H43NO3	6.6311	-	-	pos	-	-	-	-	Organic acids and derivatives	Carboxylic acids and derivatives	440.313	0.169822	0	63.9	-1.82549	-	Amino acids, peptides, and analogues	5.261	5.299	5.397	5.195	5.085	5.312	5.482	5.06	5.333	5.494	5.5	5.422	5.15	5.421	5.335	5.322	5.378	5.079	5.45	5.402	4.987	5.329	5.152
pos_601	PE(5-iso PGF2VI/15:0)	-	metab_5959	B(ii)	-	-	HMDB0260823	M+2Na, M+Na	C38H70NO11P	5.4682	-	-	pos	-	-	-	-	Not Available	Not Available	770.455	0.0487220710403	0	44.7	-4.43768	-	Not Available	5.667	5.784	5.678	5.876	5.667	5.723	5.309	5.714	5.755	5.734	5.728	5.724	5.705	5.721	5.71	5.669	5.718	5.843	2.422	5.489	5.631	5.707	5.728
pos_6029	Capsianside A	辣椒苷A	metab_5980	B(ii)	-	-	HMDB0034044	M+2H	C76H124O33	6.5993	-	C17516	pos	-	-	-	-	Lipids and lipid-like molecules	Fatty Acyls	783.408	0.0415882	0	39.5	-0.58724	116107-40-5	Fatty acyl glycosides	6.498	6.515	6.473	6.557	6.458	6.486	6.159	6.483	6.471	6.512	6.521	6.5	6.548	6.501	6.49	6.465	6.465	6.661	6.346	6.319	6.483	6.474	6.465
pos_6049	CL(16:0/i-16:0/25:0/a-25:0)	-	metab_6002	B(ii)	-	-	HMDB0238019	M+H+Na	C91H178O17P2	6.5888	-	-	pos	-	-	-	-	Lipids and lipid-like molecules	Glycerophospholipids	814.632	0.238718	0	31.3	7.98400166455271	-	Glycerophosphoglycerophosphoglycerols	3.201	5.715	5.894	5.658	5.687	5.727	5.765	5.648	5.878	5.813	5.633	5.824	5.653	5.761	3.16	5.773	5.776	5.896	5.871	5.769	5.784	5.747	5.823
pos_605	Phenobarbital	苯巴比妥	metab_6003	B(ii)	map05207	Chemical carcinogenesis - receptor activation	HMDB0015305	M+H-H2O, M+H	C12H12N2O3	5.4682	化学致癌作用-受体激活	C07434	pos	-	-	Human Diseases	Cancer: overview	Organoheterocyclic compounds	Diazines	233.092	0.0384734075863	0	32.1	-1.67395	1950-06-06	Pyrimidines and pyrimidine derivatives	3.967	4.651	3.699	3.474	4.319	4.217	5.041	3.76	3.06	4.561	3.695	4.748	3.86	4.054	4.871	4.672	4.628	3.469	4.103	5.15	4.305	4.518	4.26
pos_6062	PC(P-16:0/20:4)	-	metab_6017	B(i)	-	-	HMDB0011220;LMGP01030010;HMDB0011221	M+H	C44H80NO7P	6.5834	-	-	pos	-	-	-	-	Lipids and lipid-like molecules	Glycerophospholipids	766.572	0.111246	37	0	-3.76286	84460-45-7	Glycerophosphocholines	6.297	6.224	6.297	6.296	6.387	6.241	6.326	6.311	6.274	6.31	6.203	6.283	6.222	6.112	6.311	6.238	6.154	6.259	6.393	6.359	6.194	6.369	6.233
pos_6070	PC(P-16:0/0:0)	-	metab_6026	B(i)	-	-	LMGP01070006;HMDB0010407	M+Na	C24H50NO6P	6.5834	-	-	pos	-	-	-	-	Lipids and lipid-like molecules	Glycerophospholipids	502.326	0.223423	86.5	0	-2.03902	-	Glycerophosphocholines	4.425	4.245	4.163	4.444	3.489	3.942	3.802	3.942	4.397	4.015	4.271	4.041	3.894	4.386	4.065	4.462	4.102	4.216	4.788	4.077	4.357	4.301	4.502
pos_6071	Pyrodone	吡啶酮	metab_6027	B(ii)	-	-	HMDB0256988	M+ACN+Na	C17H25NO2	6.5834	-	C18795	pos	-	-	-	-	Organoheterocyclic compounds	Isoindoles and derivatives	339.205	0.0327518749401	0	43.4	4.08305600808465	-	Isoindolines	5.282	5.259	5.244	5.178	5.247	5.246	5.311	5.193	5.24	5.213	5.229	5.207	5.262	5.119	5.297	5.285	5.238	5.202	5.551	5.346	5.247	5.224	5.209
pos_6109	PC(16:0/18:2(9Z,12Z))	-	metab_6069	B(ii)	map01100;map00564;map00590;map00591;map00592;map05231;map04723	Metabolic pathways;Glycerophospholipid metabolism;Arachidonic acid metabolism;Linoleic acid metabolism;alpha-Linolenic acid metabolism;Choline metabolism in cancer;Retrograde endocannabinoid signaling	LMGP01010594;PW_C004022;HMDB0007973	M+H	C42H80NO8P	6.5568	代谢途径;甘油磷脂代谢;花生四烯酸代谢;亚油酸代谢;α-亚麻酸代谢;癌症的胆碱代谢;逆行内源性大麻素信号传导	C00157	pos	Lipids	Phospholipids	Metabolism;Metabolism;Metabolism;Metabolism;Metabolism;Human Diseases;Organismal Systems	Global and overview maps;Lipid metabolism;Lipid metabolism;Lipid metabolism;Lipid metabolism;Cancer: overview;Nervous system	Lipids and lipid-like molecules	Glycerophospholipids	758.568	0.0757406723862	0	79.8	-2.53693	17708-90-6;6931-84-6	Glycerophosphocholines	8.1	8.007	8.088	7.973	8.002	7.979	8.014	7.893	8.041	8.094	8.102	8.058	8.047	7.968	8.108	8.099	7.998	8.056	8.192	8.198	8.091	8.056	8.015
pos_6166	Enisoprost	依尼索前列醇	metab_6132	B(ii)	-	-	HMDB0251811	M+CH3OH+H	C22H36O5	6.5143	-	-	pos	-	-	-	-	Lipids and lipid-like molecules	Fatty Acyls	413.286	0.0427551894326	0	47.4	-8.80241	-	Fatty acid esters	5.15	5.067	5.098	5.05	5.038	5.143	5.149	5.09	5.127	5.012	5.101	5.109	5.11	5.07	5.116	5.097	5.075	5.052	5.175	5.143	5.037	5.118	5.071
pos_6170	Talinumoside I	-	metab_6137	B(ii)	-	-	HMDB0040957	M+NH4	C43H66O16	6.5033	-	-	pos	-	-	-	-	Lipids and lipid-like molecules	Prenol lipids	856.472	0.0734436640948	0	66.3	4.20727967741249	145826-48-8	Terpene glycosides	5.206	5.239	5.268	5.305	5.152	5.265	4.607	5.234	5.23	5.213	5.328	5.257	5.311	5.259	5.219	5.214	5.27	5.43	4.795	5.057	5.19	5.344	5.145
pos_6171	Ginsenoside F2	人参皂苷F2	metab_6138	B(ii)	-	-	HMDB0039545;MJDBOTE0000244	M+H	C42H72O13	6.5033	-	C20779	pos	-	-	-	-	Lipids and lipid-like molecules	Prenol lipids	785.497	0.0371863546444	0	34.3	-9.16914	62025-49-4	Triterpenoids	5.492	5.504	5.389	5.348	5.413	5.439	5.414	5.422	5.435	5.397	5.332	5.393	5.5	5.297	5.447	5.47	5.404	5.433	5.507	5.497	5.491	5.428	5.381
pos_6184	Heptaethylene glycol monododecyl ether	七甘醇单十二烷基醚	metab_6152	B(ii)	-	-	HMDB0251574	M+NH4	C26H54O8	6.4927	-	-	pos	-	-	-	-	Organic oxygen compounds	Organooxygen compounds	512.415	0.0314825827468	0	59.5	-2.15836	-	Ethers	5.22	5.186	5.215	5.445	5.204	5.333	5.563	5.121	5.132	5.061	5.145	5.231	5.264	5.107	5.187	5.212	5.168	5.096	5.396	5.268	5.201	5.225	5.149
pos_6186	Sphinganine 1-phosphate	二氢(神经)鞘氨醇1 -磷酸	metab_6154	B(ii)	map00600;map01100;map04080	Sphingolipid metabolism;Metabolic pathways;Neuroactive ligand-receptor interaction	PW_C001070;HMDB0001383;HMDB0242462	M+H	C18H40NO5P	6.4927	鞘脂代谢;代谢途径;神经活性配体-受体相互作用	C01120	pos	-	-	Metabolism;Metabolism;Environmental Information Processing	Lipid metabolism;Global and overview maps;Signaling molecules and interaction	Lipids and lipid-like molecules	Sphingolipids	382.271	0.0461586672583	0	78.9	-1.2604	19794-97-9	Phosphosphingolipids	5.33	5.183	5.32	5.004	4.934	5.179	5.282	5.359	5.31	5.062	5.111	5.177	5.302	5.12	5.242	5.31	5.245	5.296	5.047	5.276	5.065	5.352	5.007
pos_6204	LysoPC(22:4(7Z,10Z,13Z,16Z)/0:0)	-	metab_6175	B(ii)	map00564;map05231	Glycerophospholipid metabolism;Choline metabolism in cancer	HMDB0010401	M+H	C30H54NO7P	6.482	甘油磷脂代谢;癌症的胆碱代谢	C04230	pos	Lipids	Phospholipids	Metabolism;Human Diseases	Lipid metabolism;Cancer: overview	Lipids and lipid-like molecules	Glycerophospholipids	572.37	0.0822106391915	0	87.9	-1.40457	-	Glycerophosphocholines	5.685	5.675	5.603	5.677	5.741	5.692	5.785	5.554	5.522	5.556	5.601	5.617	5.555	5.42	5.531	5.726	5.606	5.556	5.864	5.434	5.623	5.559	5.699
pos_6233	PC(18:2(9Z,12Z)/16:0)	-	metab_6206	B(ii)	map01100;map00564;map00590;map00591;map00592;map05231;map04723	Metabolic pathways;Glycerophospholipid metabolism;Arachidonic acid metabolism;Linoleic acid metabolism;alpha-Linolenic acid metabolism;Choline metabolism in cancer;Retrograde endocannabinoid signaling	PW_C004181;LMGP01010932;HMDB0008133	M+H	C42H80NO8P	6.4661	代谢途径;甘油磷脂代谢;花生四烯酸代谢;亚油酸代谢;α-亚麻酸代谢;癌症的胆碱代谢;逆行内源性大麻素信号传导	C00157	pos	Lipids	Phospholipids	Metabolism;Metabolism;Metabolism;Metabolism;Metabolism;Human Diseases;Organismal Systems	Global and overview maps;Lipid metabolism;Lipid metabolism;Lipid metabolism;Lipid metabolism;Cancer: overview;Nervous system	Lipids and lipid-like molecules	Glycerophospholipids	758.568	0.0730266631006	0	77	-2.4737	-	Glycerophosphocholines	7.969	8.024	8.002	8.083	7.975	7.903	8.056	8.113	8.078	8.009	8.146	7.987	7.996	7.898	8.037	7.894	7.974	7.909	8.074	8.126	7.918	8.121	7.854
pos_6247	SM(d18:1/24:1)	-	metab_6221	B(i)	-	-	-	M+H	C47H93N2O6P	6.4608	-	-	pos	-	-	-	-	-	-	813.682	0.188951	72.4	0	-2.51388	-	-	5.903	1.961	5.816	5.911	6.022	5.947	5.907	5.762	5.817	5.986	5.868	5.844	5.949	5.843	5.914	1.934	5.866	5.94	6.151	5.836	5.912	5.909	5.938
pos_6286	PC(15:0/0:0)	-	metab_6264	B(i)	map00564;map05231	Glycerophospholipid metabolism;Choline metabolism in cancer	LMGP01050016;HMDB0010375;HMDB0010381	M+H	C23H48NO7P	6.4503	甘油磷脂代谢;癌症的胆碱代谢	C04230	pos	Lipids	Phospholipids	Metabolism;Human Diseases	Lipid metabolism;Cancer: overview	Lipids and lipid-like molecules	Glycerophospholipids	482.323	0.00245087082475	83.8	0	-1.76133	-	Glycerophosphocholines	6.691	6.538	6.703	6.592	6.542	6.615	6.531	6.447	6.461	6.684	6.531	6.604	6.589	6.773	6.614	6.641	6.568	6.497	6.853	6.555	6.632	6.388	6.719
pos_6287	(2-Hydroxy-3-phosphonooxypropyl) octadec-9-enoate	（2-羟基-3-磷酸氧基丙基）十八碳-9-烯酸酯	metab_6265	B(ii)	-	-	HMDB0242470	M+ACN+H	C21H41O7P	6.4503	-	-	pos	-	-	-	-	Lipids and lipid-like molecules	Glycerophospholipids	478.292	0.0182227047283	0	72.4	-1.99309	-	Glycerophosphates	5.887	5.848	5.896	5.816	5.809	5.823	5.814	5.787	5.798	5.917	5.873	5.761	5.774	6.005	5.858	5.874	5.839	5.748	6.128	5.864	5.886	5.705	5.807
pos_6288	Sphingosine-1-phosphate	1-磷酸鞘氨醇	metab_6266	B(i)	map01100;map04666;map05152;map00600;map04080;map04020;map04371;map04072;map04071	Metabolic pathways;Fc gamma R-mediated phagocytosis;Tuberculosis;Sphingolipid metabolism;Neuroactive ligand-receptor interaction;Calcium signaling pathway;Apelin signaling pathway;Phospholipase D signaling pathway;Sphingolipid signaling pathway	LMSP01050001;HMDB0000277	M+H	C18H38NO5P	6.4503	代谢途径;Fc-γR-介导的吞噬作用;肺结核;鞘脂代谢;神经活性配体-受体相互作用;钙信号通路;Apelin信号通路;磷脂酶D信号通路;鞘脂信号通路	C06124	pos	-	-	Metabolism;Organismal Systems;Human Diseases;Metabolism;Environmental Information Processing;Environmental Information Processing;Environmental Information Processing;Environmental Information Processing;Environmental Information Processing	Global and overview maps;Immune system;Infectious disease: bacterial;Lipid metabolism;Signaling molecules and interaction;Signal transduction;Signal transduction;Signal transduction;Signal transduction	Lipids and lipid-like molecules	Sphingolipids	380.255	0.0131164018212	84.7	0	-1.75613	26993-30-6	Phosphosphingolipids	6.058	6.02	6.104	5.857	5.879	5.969	5.996	6.029	6.024	6.039	5.919	5.941	5.974	6.043	6.036	6.057	6.011	6.009	6.081	5.953	5.989	6.025	5.951
pos_6297	Isopiperitenone	异辣薄荷烯酮	metab_6276	B(ii)	-	-	HMDB0302241	M+H-H2O	C10H14O	6.445	-	C02289	pos	-	-	-	-	Lipids and lipid-like molecules	Prenol lipids	133.101	0.0458819277335	0	60.9	-1.27986	529-01-1	Monoterpenoids	4.521	4.535	4.603	4.416	4.437	4.657	4.413	4.365	4.441	4.557	4.415	4.537	4.611	4.532	4.557	4.659	4.474	4.561	4.679	4.53	4.558	4.605	4.552
pos_6304	Prostaglandin C1	前列腺素C1	metab_6285	B(ii)	-	-	HMDB0060104;LMFA03010160	M+CH3OH+H	C20H32O4	6.4398	-	C04686	pos	Lipids	Eicosanoids	-	-	Lipids and lipid-like molecules	Fatty Acyls	369.26	0.0352340940616	0	67.2	-9.99613	35687-86-6	Eicosanoids	5.757	5.755	5.77	5.703	5.736	5.736	5.788	5.673	5.743	5.706	5.705	5.707	5.704	5.729	5.749	5.752	5.71	5.695	5.911	5.753	5.731	5.724	5.736
pos_632	Bax inhibitor peptide V5	-	metab_6302	B(ii)	-	-	HMDB0248888	M+H, M+NH4	C27H50N6O6S	5.7931	-	-	pos	-	-	-	-	Phenylpropanoids and polyketides	Flavonoids	604.389	0.00912376972225	0	44	7.1051518391806106	-	Flavans	6.733	6.835	6.761	6.916	6.744	6.795	6.434	6.814	6.796	6.813	6.81	6.791	6.815	6.841	6.781	6.779	6.778	6.959	3.631	6.589	6.741	6.791	6.814
pos_6329	(13E)-11a-Hydroxy-9,15-dioxoprost-13-enoic acid	（13E）-11a-羟基-9,15-二氧代脯氨酸-13-烯酸	metab_6312	B(ii)	-	-	HMDB0001320	M+CH3OH+H	C20H32O5	6.4238	-	C04654	pos	-	-	-	-	Lipids and lipid-like molecules	Fatty Acyls	385.255	0.0423576477243	0	71.3	-9.32927	22973-19-9	Eicosanoids	5.853	5.855	5.865	5.816	5.834	5.854	5.853	5.818	5.823	5.781	5.792	5.816	5.847	5.815	5.848	5.804	5.806	5.802	5.99	5.859	5.81	5.817	5.801
pos_6339	PA(8:0/a-13:0)	-	metab_6323	B(ii)	map01100;map00564;map04070;map00561;map05212;map05200;map04975;map04024;map04072;map04912;map05231;map04666	Metabolic pathways;Glycerophospholipid metabolism;Phosphatidylinositol signaling system;Glycerolipid metabolism;Pancreatic cancer;Pathways in cancer;Fat digestion and absorption;cAMP signaling pathway;Phospholipase D signaling pathway;GnRH signaling pathway;Choline metabolism in cancer;Fc gamma R-mediated phagocytosis	HMDB0115680;PW_C064065	M+NH4	C24H47O8P	6.4132	代谢途径;甘油磷脂代谢;磷脂酰肌醇信号系统;甘油脂代谢;胰腺癌;癌症的发病通路;脂肪的消化和吸收;cAMP信号通路;磷脂酶D信号通路;GnRH信号通路;癌症的胆碱代谢;Fc-γR-介导的吞噬作用	C00416	pos	Lipids	Phospholipids	Metabolism;Metabolism;Environmental Information Processing;Metabolism;Human Diseases;Human Diseases;Organismal Systems;Environmental Information Processing;Environmental Information Processing;Organismal Systems;Human Diseases;Organismal Systems	Global and overview maps;Lipid metabolism;Signal transduction;Lipid metabolism;Cancer: specific types;Cancer: overview;Digestive system;Signal transduction;Signal transduction;Endocrine system;Cancer: overview;Immune system	Lipids and lipid-like molecules	Glycerophospholipids	512.334	0.0450330109773	0	51	-0.876508	-	Glycerophosphates	5.148	5.217	5.064	5.012	4.93	5.157	5.137	5.212	5.201	5.235	5.113	5.161	5.228	5.213	5.192	5.108	5.18	4.908	5.18	5.022	5.269	5.122	5.059
pos_635	Indolelactic acid	吲哚乳酸	metab_6335	B(i)	-	-	HMDB0000671	M+ACN+Na, M+H	C11H11NO3	5.5535	-	C02043	pos	-	-	-	-	Organoheterocyclic compounds	Indoles and derivatives	206.081	0.139447	90.7	0	-1.46388	7417-65-4	Indolyl carboxylic acids and derivatives	4.619	4.311	4.609	4.449	4.604	4.571	4.5	4.569	4.564	4.404	4.776	4.787	4.696	4.953	4.844	4.691	4.786	4.37	4.928	4.776	4.635	4.208	4.477
pos_6351	8(R)-HETE	8（R）-赫特	metab_6337	B(i)	map00590	Arachidonic acid metabolism	-	M+H-H2O	C20H32O3	6.4027	花生四烯酸代谢	C14824	pos	-	-	Metabolism	Lipid metabolism	-	-	303.231	0.0254432321296	72.9	0	-1.60492	-	-	5.272	5.245	5.307	4.951	4.385	5.085	5.257	4.905	5.15	5.531	5.362	5.477	4.99	5.474	5.297	5.229	5.481	4.612	5.182	5.323	4.859	5.012	5.263
pos_6368	LysoPA(22:5(4Z,7Z,10Z,13Z,16Z)/0:0)	-	metab_6355	B(ii)	-	-	HMDB0114753	M+ACN+H	C25H41O7P	6.392	-	-	pos	-	-	-	-	Lipids and lipid-like molecules	Glycerophospholipids	526.292	0.112404	0	70.8	-2.12235	-	Glycerophosphates	5.472	5.384	5.23	5.384	5.272	5.382	5.388	5.162	5.412	5.334	5.234	5.278	5.208	5.123	5.225	5.492	5.329	5.237	5.546	5.332	5.245	5.277	5.333
pos_6369	Deoxynivalenol	红梭霉毒素	metab_6356	B(ii)	-	-	HMDB0036156	M+CH3OH+H	C15H20O6	6.392	-	C09747	pos	-	-	-	-	Lipids and lipid-like molecules	Prenol lipids	329.159	0.0507001515817	0	30.5	-1.73706	51481-10-8	Sesquiterpenoids	5.098	5.084	5.137	5.027	5.02	5.097	5.045	5.06	5.157	5.193	5.062	5.169	5.157	5.198	5.284	5.159	5.186	5.1	5.356	5.225	5.152	5.185	5.163
pos_6461	5-O-Methylembelin	2-羟基-5-甲氧基-3-十一烷基[1,4]苯醌	metab_6459	B(ii)	-	-	HMDB0040867;LMPK15050007	M+CH3OH+H	C18H28O4	6.3548	-	C10373	pos	-	-	-	-	Organic oxygen compounds	Organooxygen compounds	341.23	0.0310108441697	0	32	-8.09408	56005-10-8	Carbonyl compounds	5.447	5.484	5.481	5.397	5.405	5.408	5.472	5.425	5.425	5.423	5.408	5.42	5.377	5.444	5.444	5.406	5.405	5.368	5.706	5.441	5.396	5.397	5.403
pos_6465	1-Pentene	1-戊烯	metab_6463	B(ii)	-	-	HMDB0243987	M+NH4	C5H10	6.3548	-	-	pos	-	-	-	-	Hydrocarbons	Unsaturated hydrocarbons	88.112	0.00627479403527	0	47.1	-1.44682	-	Unsaturated aliphatic hydrocarbons	6.183	6.176	6.197	6.139	6.15	6.182	6.194	6.126	6.174	6.164	6.146	6.156	6.167	6.158	6.164	6.162	6.141	6.129	6.389	6.191	6.154	6.138	6.15
pos_649	2-(2-Butoxyethoxy)ethanol	2-（2-丁氧基乙氧基）乙醇	metab_6490	B(i)	-	-	HMDB0244918	M+H, M+Na	C8H18O3	5.8581	-	-	pos	-	-	-	-	Organic oxygen compounds	Organooxygen compounds	185.114	0.0442505490742	62.4	0	-2.52283	-	Ethers	4.762	4.756	4.741	4.678	4.735	4.74	4.75	4.692	4.715	4.751	4.656	4.686	4.657	4.657	4.704	4.674	4.672	4.634	4.891	4.741	4.672	4.673	4.69
pos_6509	2',3'-Dideoxyadenosine	2 '，3 ' -双脱氧腺苷	metab_6512	B(ii)	-	-	HMDB0245544	M+NH4	C10H13N5O2	6.339	-	-	pos	-	-	-	-	Nucleosides, nucleotides, and analogues	Purine nucleosides	253.14	0.0202064	0	65.9	-1.70259	-	Purine 2'',3''-dideoxyribonucleosides	5.113	5.095	5.133	5.045	5.079	5.115	5.114	5.046	5.044	5.066	5.029	5.04	5.026	4.994	5.042	5.07	5.064	4.995	5.329	5.088	5.021	4.977	5.033
pos_6510	Prostaglandin F3a	前列腺素F3a	metab_6514	B(ii)	-	-	HMDB0002122	M+CH3OH+H	C20H32O5	6.339	-	C06476	pos	Lipids	Eicosanoids	-	-	Lipids and lipid-like molecules	Fatty Acyls	385.255	0.0167844577401	0	72.9	-9.22603	745-64-2	Eicosanoids	6.132	6.131	6.165	6.077	6.127	6.132	6.175	6.088	6.124	6.13	6.092	6.102	6.105	6.118	6.132	6.117	6.085	6.055	6.399	6.152	6.093	6.085	6.089
pos_6513	6-Hydroxypentadecanedioic acid	6 -羟基十五烷二酸	metab_6517	B(ii)	-	-	HMDB0031885	M+Na	C15H28O5	6.339	-	-	pos	-	-	-	-	Lipids and lipid-like molecules	Fatty Acyls	311.182	0.0171980975846	0	49.8	-2.68507	38076-52-7	Fatty acids and conjugates	5.497	5.509	5.516	5.46	5.472	5.469	5.517	5.449	5.472	5.482	5.461	5.46	5.429	5.446	5.46	5.474	5.445	5.407	5.701	5.513	5.442	5.434	5.456
pos_6514	Butylate	苏达灭	metab_6518	B(ii)	-	-	HMDB0249477	M+ACN+Na	C11H23NOS	6.339	-	C14323	pos	-	-	-	-	Organosulfur compounds	Thiocarbonyl compounds	281.164	0.0518641644799	0	61.3	-7.23892	2008-41-5	Thiocarbamic acid derivatives	5.954	5.937	5.968	5.898	5.94	5.947	5.988	5.916	5.947	5.962	5.937	5.953	5.939	5.939	5.958	5.946	5.928	5.905	6.193	5.994	5.944	5.916	5.92
pos_6515	Adenine	腺嘌呤	metab_6519	B(ii)	map01100;map01232;map00230	Metabolic pathways;Nucleotide metabolism;Purine metabolism	HMDB0000034;PW_C000024;MJDBOTE0000759	M+ACN+H	C5H5N5	6.339	代谢途径;核苷酸代谢;嘌呤代谢	C00147	pos	Nucleic acids	Bases	Metabolism;Metabolism;Metabolism	Global and overview maps;Global and overview maps;Nucleotide metabolism	Organoheterocyclic compounds	Imidazopyrimidines	177.088	0.0851068180893	0	66.2	-2.13451	73-24-5	Purines and purine derivatives	5.031	5.024	5.022	4.933	4.971	4.989	5.038	4.975	4.971	5.008	4.972	4.996	4.97	4.994	4.981	4.962	4.967	4.916	5.23	5.054	4.95	4.958	4.972
pos_6569	Vellosimine	维洛斯明碱	metab_6578	B(ii)	-	-	HMDB0304532	M+H-H2O	C19H20N2O	6.323	-	C11634	pos	-	-	-	-	Alkaloids and derivatives	Macroline alkaloids	275.154	0.0116182314339	0	34.4	-0.830131	6874-98-2	Not Available	4.963	5.019	5.003	4.963	4.984	4.995	5.033	4.91	4.981	4.968	4.957	4.96	5.006	4.945	4.888	4.965	4.965	4.952	5.098	5.031	4.958	4.947	4.963
pos_6570	3-Methyl-N-phenylaniline	3 -甲基-二苯胺	metab_6580	B(i)	-	-	-	M+H	C13H13N	6.323	-	-	pos	-	-	-	-	-	-	184.112	0.0515252053098	66.9	0	-1.55039	-	-	4.716	4.751	4.717	4.67	4.705	4.731	4.748	4.626	4.727	4.652	4.636	4.659	4.675	4.649	4.629	4.686	4.632	4.628	4.853	4.674	4.674	4.623	4.616
pos_658	PE-NMe(20:3(5Z,8Z,11Z)/20:5(5Z,8Z,11Z,14Z,17Z))	-	metab_6590	B(ii)	-	-	PW_C059509;HMDB0113385	M+2Na, M+Na	C46H76NO8P	5.8846	-	C01241	pos	-	-	-	-	Lipids and lipid-like molecules	Glycerophospholipids	824.52	0.128078	0	42.1	-0.608467	-	Glycerophosphoethanolamines	5.274	5.35	5.29	5.492	5.288	5.329	4.826	5.346	5.363	5.393	5.367	5.316	5.351	5.395	5.353	5.311	5.315	5.557	2.849	5.091	5.309	5.427	5.324
pos_6594	Batatasin IV	山药素IV	metab_6606	B(ii)	-	-	LMPK13090032;HMDB0032641	M+NH4	C15H16O3	6.3177	-	C10247	pos	-	-	-	-	Phenylpropanoids and polyketides	Stilbenes	262.143	0.0581776812143	0	43.9	-1.563	60347-67-3	Not Available	5.303	4.872	5.143	5.028	5.251	5.149	4.458	5.203	4.72	4.513	5.182	4.191	5.05	4.712	4.936	5.09	4.964	4.61	5.308	4.718	4.723	4.421	4.913
pos_662	Milbemycin beta1	密灭汀beta1	metab_6635	B(ii)	-	-	HMDB0254727;HMDB0254730;HMDB0254721;HMDB0242623	M+H, M+NH4	C32H48O7	5.8899	-	-	pos	-	-	-	-	Phenylpropanoids and polyketides	Macrolides and analogues	562.379	0.0457719626475	0	60.3	9.0869372075824	-	Milbemycins	6.115	6.247	6.149	6.296	6.128	6.151	5.81	6.224	6.168	6.203	6.197	6.203	6.201	6.238	6.209	6.165	6.186	6.327	3.307	5.996	6.136	6.198	6.214
pos_6639	(3b,6b,8a,12a)-8,12-Epoxy-7(11)-eremophilene-6,8,12-trimethoxy-3-ol	（3b，6b，8a，12a）-8,12-环氧-7（11）-eremophilene-6,8,12-三甲氧基-3-醇	metab_6656	B(ii)	-	-	HMDB0031963	M+H	C18H30O5	6.307	-	-	pos	-	-	-	-	Organoheterocyclic compounds	Naphthofurans	327.214	0.0495088337941	0	47	-9.46405	-	Not Available	5.849	5.835	5.866	5.789	5.845	5.862	5.907	5.792	5.85	5.842	5.812	5.818	5.828	5.813	5.827	5.831	5.792	5.765	6.124	5.899	5.8	5.822	5.821
pos_6646	Dimethyltriazenoimidazole carboxamide	二甲基三氮唑并咪唑甲酰胺	metab_6664	B(ii)	-	-	HMDB0258139	M+H-H2O	C6H10N6O	6.307	-	-	pos	-	-	-	-	Organic acids and derivatives	Carboxylic acids and derivatives	165.088	0.0261288900965	0	33.2	-1.47863	-	Carboxylic acid derivatives	5.798	5.784	5.808	5.733	5.78	5.791	5.85	5.758	5.802	5.777	5.761	5.771	5.766	5.754	5.764	5.79	5.76	5.72	6.048	5.811	5.743	5.757	5.751
pos_675	4-(2-chloroanilino)-4-oxobutanoic acid	4-（2-氯苯胺基）-4-氧代丁酸	metab_6778	B(i)	-	-	-	M+H-H2O, M+H	C10H10ClNO3	5.9165	-	-	pos	-	-	-	-	-	-	228.042	0.111058	55.1	0	-1.66351	-	-	3.348	4.563	3.047	3.055	3.904	3.818	4.816	3.015	3.031	4.178	3.234	4.352	3.028	3.06	4.559	4.26	4.171	3.041	3.788	4.9	3.744	4.126	3.864
pos_6759	Mdp-gdp	-	metab_6788	B(ii)	-	-	HMDB0254384	M+2H	C54H98N4O15	6.2754	-	-	pos	-	-	-	-	Organic acids and derivatives	Carboxylic acids and derivatives	522.354	0.147862	0	40.7	-9.868	-	Amino acids, peptides, and analogues	5.682	5.645	5.408	5.511	5.613	5.647	5.627	5.583	5.58	5.494	5.543	5.667	5.686	5.607	5.577	5.616	5.637	5.404	5.598	5.642	5.579	5.439	5.594
pos_681	Cucurbitacin S	葫芦素S	metab_6845	B(ii)	-	-	LMST01010116;HMDB0250583	M+Na, M+K	C30H42O6	5.9218	-	C08806	pos	-	-	-	-	Lipids and lipid-like molecules	Steroids and steroid derivatives	521.292	0.0321880294909	0	72.8	9.9904473392572	60137-06-6	Oxosteroids	6.504	6.597	6.675	6.734	6.621	6.66	6.364	6.503	6.574	6.665	6.603	6.575	6.548	6.624	6.431	6.443	6.514	6.724	4.074	6.234	6.544	6.477	6.626
pos_6820	Ruscogenin	鲁斯可皂甙元	metab_6857	B(ii)	-	-	HMDB0257364;LMST01080038	M+K	C27H42O4	6.2595	-	C08909	pos	-	-	-	-	Lipids and lipid-like molecules	Prenol lipids	469.274	0.0793585974719	0	63.4	5.29606629626874	472-11-7	Triterpenoids	5.015	4.847	5.006	4.759	4.938	4.858	5.202	4.761	4.904	4.934	4.962	4.875	4.962	4.933	5.003	5.096	4.819	4.807	5.697	5.219	5.033	4.889	4.877
pos_6857	Cibaric acid	枸橼酸	metab_6896	B(ii)	-	-	HMDB0038580;LMFA02000289	M+CH3OH+H	C18H28O5	6.2542	-	-	pos	-	-	-	-	Lipids and lipid-like molecules	Fatty Acyls	357.224	0.0101318105629	0	73.4	-9.84704	130523-93-2	Lineolic acids and derivatives	6.269	6.239	6.28	6.183	6.227	6.249	6.291	6.189	6.236	6.214	6.213	6.199	6.201	6.206	6.236	6.226	6.166	6.164	6.582	6.24	6.216	6.166	6.194
pos_6860	3-(6-Aminopurin-9-yl)-5-(hydroxymethyl)cyclopentane-1,2-diol	3-（6-氨基嘌呤-9-基）-5-（羟甲基）环戊烷-1,2-二醇	metab_6900	B(ii)	-	-	HMDB0244841	M+NH4	C11H15N5O3	6.2542	-	-	pos	-	-	-	-	Nucleosides, nucleotides, and analogues	Nucleoside and nucleotide analogues	283.151	0.0214238327108	0	66.8	-1.78857	-	Cyclopentyl nucleosides	5.886	5.863	5.906	5.808	5.856	5.881	5.949	5.815	5.863	5.865	5.838	5.852	5.85	5.856	5.846	5.857	5.82	5.803	6.208	5.905	5.84	5.822	5.815
pos_6861	N-Acetyl-b-glucosaminylamine	N -乙酰- b -氨基葡萄糖	metab_6901	B(ii)	-	-	HMDB0001104	M+CH3OH+H	C8H16N2O5	6.2542	-	C01239	pos	-	-	-	-	Organic oxygen compounds	Organooxygen compounds	253.14	0.0225246447914	0	75.5	4.40879134843901	-	Carbohydrates and carbohydrate conjugates	5.192	5.197	5.264	5.108	5.19	5.236	5.252	5.182	5.174	5.174	5.144	5.167	5.146	5.233	5.213	5.176	5.135	5.047	5.551	5.204	5.174	5.116	5.146
pos_6863	2-Aminopurine	2-氨基嘌呤	metab_6903	B(ii)	-	-	HMDB0245025	M+ACN+H	C5H5N5	6.2542	-	-	pos	-	-	-	-	Organoheterocyclic compounds	Imidazopyrimidines	177.088	0.0446156431073	0	65.4	-2.2399	-	Purines and purine derivatives	5.12	5.119	5.163	5.082	5.1	5.128	5.184	5.082	5.116	5.106	5.132	5.103	5.077	5.092	5.116	5.127	5.061	5.074	5.525	5.183	5.121	5.108	5.124
pos_6935	N,N'-Dicyclohexylurea	N，N ' -二环己基脲	metab_6983	B(i)	-	-	HMDB0244166	M+H	C13H24N2O	6.2384	-	-	pos	-	-	-	-	Organic acids and derivatives	Organic carbonic acids and derivatives	225.196	0.0252421534589	78.4	0	-1.5026	-	Ureas	5.901	5.904	5.982	5.865	5.878	5.906	5.905	5.937	5.863	5.846	5.857	5.832	5.866	5.841	5.859	5.854	5.824	5.89	6.181	5.883	5.866	5.8	5.866
pos_6986	Ganoderiol B	灵芝嘌呤B	metab_7039	B(ii)	-	-	HMDB0035327	2M+3H2O+2H	C30H46O4	6.2226	-	-	pos	-	-	-	-	Lipids and lipid-like molecules	Prenol lipids	484.347	0.0295755963297	0	35.9	-8.1677	106518-62-1	Triterpenoids	6.734	6.79	6.695	6.765	6.758	6.755	6.695	6.733	6.755	6.799	6.768	6.774	6.761	6.774	6.764	6.733	6.766	6.737	4.773	6.712	6.743	6.767	6.772
pos_700	Tsugaric acid A 21-glucosyl ester	糖酸A 21 -葡萄糖基酯	metab_7056	B(ii)	-	-	HMDB0033425	M+NH4, M+Na	C38H60O9	5.9588	-	-	pos	-	-	-	-	Lipids and lipid-like molecules	Prenol lipids	678.463	0.050331	0	42.8	8.20974019699453	205119-13-7	Triterpenoids	5.812	5.854	5.697	5.888	5.822	5.793	5.739	5.792	5.791	5.831	5.782	5.852	5.769	5.805	5.756	5.706	5.845	5.704	3.373	5.654	5.771	5.751	5.876
pos_7116	8-Hydroxyoctadecanoylcarnitine	8 -羟基十八烷酰基肉碱	metab_7185	B(ii)	-	-	HMDB0241524	M+H-H2O	C25H49NO5	6.1805	-	-	pos	-	-	-	-	Lipids and lipid-like molecules	Fatty Acyls	426.357	0.0499574894295	0	54.7	-1.33742	-	Fatty acid esters	6.061	6.108	6.223	6.119	6.033	6.112	6.181	6.155	6.205	6.018	6.124	6.169	6.119	6.077	6.032	6.173	6.103	5.987	6.515	6.205	5.997	6.104	6.039
pos_7137	Palmitoylcarnitine	棕榈酰肉碱	metab_7207	B(i)	map01212;map00071	Fatty acid metabolism;Fatty acid degradation	HMDB0240783;HMDB0000222;LMFA07070004	M+H	C23H45NO4	6.1752	脂肪酸代谢;脂肪酸降解	C02990	pos	-	-	Metabolism;Metabolism	Global and overview maps;Lipid metabolism	Lipids and lipid-like molecules	Fatty Acyls	400.341	0.0135435743688	81.3	0	-1.63163	2364-67-2	Fatty acid esters	6.186	6.273	6.332	6.296	6.157	6.223	6.282	6.356	6.35	6.244	6.295	6.271	6.258	6.208	6.237	6.278	6.316	6.158	6.599	6.41	6.149	6.328	6.164
pos_716	Di-homo-gamma-linolenate	-	metab_7232	B(ii)	-	-	HMDB0304332	M+H-H2O, M+2Na-H	C20H33O2-	5.9852	-	-	pos	-	-	-	-	Lipids and lipid-like molecules	Fatty Acyls	350.222	0.0139008319886	0	42.3	9.33785431531551	-	Fatty acids and conjugates	5.054	5.037	5.073	5.001	5.056	5.085	5.113	5.029	5	5.057	5.047	5.084	5.031	5.057	5.071	5.037	4.989	4.937	5.283	5.052	5.044	5.001	5.043
pos_717	3-(Aminomethyl)-2,5,9-trimethyl-7H-furo[3,2-g]chromen-7-one	3-（氨基甲基）-2,5,9-三甲基-7H-呋喃并[3,2-g]色烯-7-酮	metab_7243	B(ii)	-	-	HMDB0248325	M+H, M+NH4	C15H15NO3	5.9852	-	-	pos	-	-	-	-	Phenylpropanoids and polyketides	Coumarins and derivatives	258.112	0.0517932059068	0	59	-1.61903	-	Furanocoumarins	5.576	5.553	5.63	5.451	5.597	5.58	5.666	5.549	5.563	5.599	5.56	5.542	5.566	5.58	5.611	5.609	5.528	5.46	5.931	5.679	5.562	5.553	5.562
pos_7193	Sphingosine	鞘氨醇	metab_7269	B(i)	map00600;map01100;map04071;map04210;map04217	Sphingolipid metabolism;Metabolic pathways;Sphingolipid signaling pathway;Apoptosis;Necroptosis	HMDB0000252;LMSP01010001;PW_C000172	M+H	C18H37NO2	6.1594	鞘脂代谢;代谢途径;鞘脂信号通路;细胞凋亡;程序性坏死	C00319	pos	-	-	Metabolism;Metabolism;Environmental Information Processing;Cellular Processes;Cellular Processes	Lipid metabolism;Global and overview maps;Signal transduction;Cell growth and death;Cell growth and death	Organic nitrogen compounds	Organonitrogen compounds	300.289	0.0334530120809	96.5	0	-1.74757	123-78-4	Amines	5.364	5.241	5.199	5.445	5.027	5.249	5.12	5.049	5.439	5.436	5.267	5.123	5.064	5.437	5.295	5.255	5.293	4.838	5.711	5.341	5.163	4.984	5.527
pos_7194	Lobucavir	洛布卡韦	metab_7270	B(ii)	-	-	HMDB0254142	M+NH4	C11H15N5O3	6.1594	-	-	pos	-	-	-	-	Organoheterocyclic compounds	Imidazopyrimidines	283.151	0.0708694556655	0	51.5	-1.91433	-	Purines and purine derivatives	5.694	5.679	5.726	5.609	5.629	5.657	5.718	5.611	5.63	5.634	5.633	5.62	5.643	5.653	5.688	5.647	5.579	5.59	6.196	5.704	5.634	5.624	5.592
pos_7196	(1'R)-Nepetalic acid	（1'R）-壬二酸	metab_7272	B(ii)	-	-	HMDB0036117	M+Na	C10H16O3	6.1594	-	-	pos	-	-	-	-	Lipids and lipid-like molecules	Prenol lipids	207.099	0.0492122990666	0	69.2	-3.29086	21651-54-7	Monoterpenoids	4.643	4.732	4.719	4.583	4.685	4.678	4.699	4.607	4.671	4.635	4.55	4.49	4.622	4.738	4.701	4.656	4.56	4.571	5.261	4.736	4.68	4.622	4.445
pos_7219	PC(P-18:1(11Z)/PGJ2)	-	metab_7298	B(ii)	-	-	HMDB0289665	2M+3H2O+2H	C46H80NO9P	6.1489	-	-	pos	-	-	-	-	Not Available	Not Available	835.57	0.0344722140167	0	35.6	2.02936934274351	-	Not Available	6.751	6.765	6.675	6.786	6.76	6.731	6.69	6.759	6.774	6.768	6.718	6.771	6.725	6.697	6.722	6.647	6.755	6.716	6.263	6.634	6.722	6.731	6.752
pos_7326	Tuberculostearic acid	结核硬脂酸	metab_7417	B(ii)	-	-	LMFA01020015;HMDB0004085	M+NH4	C19H38O2	6.1278	-	C16794	pos	-	-	-	-	Lipids and lipid-like molecules	Fatty Acyls	316.32	0.0542572247886	0	40.1	-2.93355	542-47-2	Fatty acids and conjugates	5.443	5.46	5.507	5.357	5.463	5.448	5.484	5.391	5.43	5.379	5.418	5.337	5.407	5.363	5.377	5.477	5.313	5.358	6.022	5.448	5.357	5.33	5.341
pos_7327	2-Amino-9-[4-hydroxy-2-(hydroxymethyl)butyl]-3H-purin-6-one	2-氨基-9-[4-羟基-2-（羟甲基）丁基]-3H-嘌呤-6-酮	metab_7418	B(ii)	-	-	HMDB0244320	M+NH4	C10H15N5O3	6.1278	-	-	pos	-	-	-	-	Organoheterocyclic compounds	Imidazopyrimidines	271.151	0.129864	0	38.2	-1.53606	-	Purines and purine derivatives	4.523	4.433	4.669	4.486	4.482	4.59	4.574	4.481	4.532	4.439	4.391	4.405	4.473	4.432	4.468	4.463	4.339	4.243	5.198	4.499	4.533	4.562	4.292
pos_7405	Octanol	辛醇	metab_7505	B(ii)	-	-	HMDB0001183	2M+ACN+H	C8H18O	6.1119	-	C00756	pos	-	-	-	-	Lipids and lipid-like molecules	Fatty Acyls	302.305	0.0204880690111	0	61.2	-1.94884	111-87-5	Fatty alcohols	5.133	4.964	5.068	4.973	5.089	5.728	5.196	4.949	4.944	5.074	5.036	4.886	5.012	5.003	4.913	5.033	4.855	4.93	5.626	5.036	4.975	5.055	5.026
pos_7433	Corticosterone	皮质酮	metab_7536	B(i)	map01100;map04923;map00140;map04925;map05020	Metabolic pathways;Regulation of lipolysis in adipocytes;Steroid hormone biosynthesis;Aldosterone synthesis and secretion;Prion disease	HMDB0001547;PW_C001190;LMST02030186;MJDBOTE0000847	M+H	C21H30O4	6.1067	代谢途径;脂肪细胞脂解的调控;类固醇激素生物合成;醛固酮的合成和分泌;朊病毒病	C02140	pos	Steroids;Hormones and transmitters	21-Carbon atoms;Steroid hormones	Metabolism;Organismal Systems;Metabolism;Organismal Systems;Human Diseases	Global and overview maps;Endocrine system;Lipid metabolism;Endocrine system;Neurodegenerative disease	Lipids and lipid-like molecules	Steroids and steroid derivatives	347.221	0.0312354484784	90	0	-1.80664	50-22-6	Hydroxysteroids	6.199	6.06	6.148	6.065	6.14	6.115	5.922	5.904	5.943	6.077	5.942	6.084	5.96	6.096	5.993	6.018	6.137	5.936	6.288	5.923	5.518	5.997	6.09
pos_7459	Hydroxytetradecadienyl-l-carnitine	-	metab_7564	B(ii)	-	-	HMDB0253295	M+H	C21H39NO4	6.1014	-	-	pos	-	-	-	-	Lipids and lipid-like molecules	Fatty Acyls	370.294	0.0522524177817	0	63.9	-1.96916	-	Fatty acids and conjugates	5.185	5.318	5.379	5.133	5.353	5.281	5.426	5.444	5.238	5.203	5.269	5.379	5.222	5.294	5.309	5.414	5.329	5.148	5.938	5.491	5.211	5.354	5.167
pos_7541	Acetylpterosin C	乙酰蝶呤素C	metab_7656	B(ii)	-	-	HMDB0030764	M+H	C16H20O4	6.0856	-	-	pos	-	-	-	-	Benzenoids	Indanes	277.143	0.0851308496477	0	66.4	-1.6126	-	Indanones	5.165	5.158	4.946	4.78	5.09	5.068	5.444	5.094	4.791	5.083	5.106	5.167	5.166	5.093	5.379	5.211	5.014	4.645	5.166	5.517	4.888	5.055	4.732
pos_7563	Lauroylcarnitine	月桂酰肉碱	metab_7680	B(i)	-	-	LMFA07070090;HMDB0002250	M+H	C19H37NO4	6.0803	-	-	pos	-	-	-	-	Lipids and lipid-like molecules	Fatty Acyls	344.279	0.0415706317145	69.2	0	-1.80663	25518-54-1	Fatty acid esters	5.098	5.133	5.134	4.97	5.157	5.036	5.197	5.348	4.99	5.206	5.137	5.252	5.112	5.12	5.213	5.208	5.286	4.949	5.641	5.383	5.067	5.257	5.071
pos_7564	1-cyclohexyl-3-[2-(4-ethoxyphenoxy)ethyl]urea	1-环己基-3-[2-（4-乙氧基苯氧基）乙基]脲	metab_7681	B(i)	-	-	-	M+H	C17H26N2O3	6.0803	-	-	pos	-	-	-	-	-	-	307.201	0.145349	64.5	0	-1.64727	-	-	4.43	4.03	3.91	3.372	4.273	3.655	3.31	4.761	4.99	3.704	3.375	3.375	4.278	4.432	3.775	3.724	4.508	3.442	4.943	3.308	4.919	4.55	3.363
pos_7567	1-Dodecanamine	1 ~十二烷基伯胺	metab_7684	B(i)	-	-	-	M+H	C12H27N	6.0803	-	-	pos	-	-	-	-	-	-	186.221	0.0301616	35.4	0	-1.73023	-	-	5.241	5.209	5.308	5.186	5.334	5.402	5.244	5.28	5.28	5.165	5.218	5.207	5.172	5.225	5.223	5.174	5.176	5.18	5.48	5.255	5.229	5.175	5.171
pos_7602	3-O-Sulfogalactosylceramide (d18:1/18:0)	-	metab_7724	B(ii)	map00600;map01100	Sphingolipid metabolism;Metabolic pathways	HMDB0012314	M+2H	C42H81NO11S	6.0698	鞘脂代谢;代谢途径	C06125	pos	Lipids	Glycolipids	Metabolism;Metabolism	Lipid metabolism;Global and overview maps	Lipids and lipid-like molecules	Sphingolipids	404.784	0.0664156601203	0	32.9	0.989644564897896	244215-65-4	Glycosphingolipids	5.67	5.693	5.557	5.651	5.622	5.609	5.54	5.707	5.553	5.703	5.633	5.656	5.667	5.621	5.606	5.603	5.637	5.624	3.344	5.607	5.581	5.644	5.685
pos_7606	N,N-Dimethyldodecylamine-N-oxide	N，N-十二烷基二甲基胺氮氧化物	metab_7728	B(i)	-	-	-	M+H	C14H31NO	6.0698	-	-	pos	-	-	-	-	-	-	230.247	0.0341928074439	89.8	0	-1.71979	-	-	6.534	6.501	6.593	6.482	6.516	6.69	6.477	6.519	6.521	6.492	6.521	6.507	6.456	6.502	6.492	6.532	6.505	6.493	6.826	6.458	6.521	6.47	6.484
pos_7622	PE(22:0/22:5(7Z,10Z,13Z,16Z,19Z))	-	metab_7746	B(ii)	map01100;map00564;map00563;map04136;map05167;map04723;map04140	Metabolic pathways;Glycerophospholipid metabolism;Glycosylphosphatidylinositol (GPI)-anchor biosynthesis;Autophagy - other;Kaposi sarcoma-associated herpesvirus infection;Retrograde endocannabinoid signaling;Autophagy - animal	HMDB0009506;PW_C005554	M+2Na	C49H88NO8P	6.0645	代谢途径;甘油磷脂代谢;糖基磷脂酰肌醇（GPI）-锚定生物合成;自噬-其他;卡波西肉瘤相关疱疹病毒感染;逆行内源性大麻素信号传导;自噬-动物	C00350	pos	Lipids	Phospholipids	Metabolism;Metabolism;Metabolism;Cellular Processes;Human Diseases;Organismal Systems;Cellular Processes	Global and overview maps;Lipid metabolism;Glycan biosynthesis and metabolism;Transport and catabolism;Infectious disease: viral;Nervous system;Transport and catabolism	Lipids and lipid-like molecules	Glycerophospholipids	447.803	0.0698611506457	0	36.2	3.89969080113808	-	Glycerophosphoethanolamines	5.213	5.184	5.323	5.16	5.213	5.194	5.397	5.269	5.384	5.448	5.209	5.302	5.301	5.299	5.225	5.298	5.136	5.156	5.342	4.932	5.615	5.225	5.363
pos_7624	4-Dodecylmorpholine	4 -十二烷基吗啉	metab_7748	B(i)	-	-	-	M+H	C16H33NO	6.0645	-	-	pos	-	-	-	-	-	-	256.263	0.245378	34.3	0	-1.63683	-	-	5.2	5.194	5.134	5.057	5.175	5.249	5.197	5.057	5.185	5.037	5.176	5.093	5.096	5.188	5.204	5.082	5.056	5.027	5.474	5.112	5.051	5.031	5.091
pos_7639	6-Hydroxyoctadecanoic acid	6 -羟基十八烷酸	metab_7764	B(ii)	-	-	HMDB0112193	M+NH4	C18H36O3	6.0592	-	-	pos	-	-	-	-	Lipids and lipid-like molecules	Fatty Acyls	318.3	0.0336947	0	35	-1.89507	3158-47-2	Fatty acids and conjugates	5.705	5.669	5.715	5.617	5.739	6.071	5.747	5.665	5.647	5.629	5.666	5.649	5.687	5.657	5.721	5.664	5.634	5.631	6.1	5.709	5.696	5.681	5.661
pos_7642	4-(Dodecylamino)Phenol	4-（十二烷基氨基）苯酚	metab_7768	B(ii)	-	-	HMDB0256035	M+H-H2O	C18H31NO	6.0592	-	-	pos	-	-	-	-	Organic nitrogen compounds	Organonitrogen compounds	260.237	0.136113	0	33.7	-1.81479	-	Amines	4.989	4.935	4.988	4.874	4.899	4.914	4.98	4.7	4.937	4.986	4.668	4.88	4.891	4.663	4.788	4.887	4.735	4.828	5.221	4.848	4.908	4.919	4.758
pos_7681	L-Proline, 1-(1-L-leucyl-L-prolyl)-	L-脯氨酸，1-（1-L-亮氨酰基-L-脯氨酰基）-	metab_7811	B(ii)	-	-	HMDB0253022	M+NH4	C16H27N3O4	6.0487	-	-	pos	-	-	-	-	Organic acids and derivatives	Carboxylic acids and derivatives	343.237	0.136278	0	67.4	8.90270387779255	-	Amino acids, peptides, and analogues	5.502	5.527	5.569	5.469	5.456	5.442	5.532	5.405	5.465	5.456	5.417	5.467	5.454	5.454	5.489	5.469	5.413	5.352	5.826	5.484	5.412	5.426	5.403
pos_7693	TG(22:6(4Z,7Z,10Z,13Z,16Z,19Z)/20:3n6/22:6(4Z,7Z,10Z,13Z,16Z,19Z))	-	metab_7824	B(ii)	-	-	HMDB0055929	M+2Na	C67H100O6	6.0434	-	-	pos	-	-	-	-	Lipids and lipid-like molecules	Glycerolipids	523.363	0.0239026	0	37.2	-4.5875	-	Triradylcglycerols	6.666	6.673	6.587	6.73	6.668	6.653	6.603	6.649	6.706	6.712	6.673	6.716	6.672	6.666	6.696	6.591	6.682	6.644	5.53	6.589	6.655	6.654	6.69
pos_7760	N-Myristoyl Tryptophan	N -肉豆蔻酰色氨酸	metab_7899	B(ii)	-	-	HMDB0242061	2M+3H2O+2H	C25H38N2O3	6.0276	-	-	pos	-	-	-	-	Not Available	Not Available	428.303	0.0677372026706	0	36	7.697245836976861	-	Not Available	5.965	5.987	5.883	6.034	5.956	5.964	5.913	5.973	5.972	6.017	5.958	6.014	5.982	6.018	5.993	5.892	6.021	5.964	4.566	5.924	5.975	5.98	6.04
pos_7761	(R)-1-O-[b-D-Apiofuranosyl-(1->2)-b-D-glucopyranoside]-1,3-octanediol	（R） -1-O-[b-D-呋喃磺酰基-（1->2）-b-D-吡喃葡萄糖苷]-1,3-辛二醇	metab_7900	B(ii)	-	-	HMDB0032798	M+H-H2O	C21H40O9	6.0276	-	-	pos	-	-	-	-	Lipids and lipid-like molecules	Fatty Acyls	419.261	0.0188966807737	0	50.2	-7.52549	-	Fatty alcohols	5.184	5.153	5.27	5.042	5.203	5.203	5.274	5.136	5.152	5.164	5.159	5.08	5.205	5.075	5.191	5.186	5.003	5.088	5.777	5.293	5.16	5.138	5.176
pos_7764	(6S)-Tetrahydro-L-biopterin	（6S）-四氢-L-生物蝶呤	metab_7903	B(ii)	-	-	HMDB0257928	M+ACN+H	C9H15N5O3	6.0276	-	-	pos	-	-	-	-	Organoheterocyclic compounds	Pteridines and derivatives	283.151	0.0258933206794	0	59.1	-2.08718	-	Pterins and derivatives	5.887	5.86	5.933	5.813	5.866	5.868	5.931	5.832	5.835	5.855	5.856	5.816	5.844	5.856	5.874	5.884	5.795	5.785	6.292	5.938	5.856	5.825	5.83
pos_7765	2-Amino-6-methoxypurine	2 -氨基- 6 -甲氧基嘌呤	metab_7904	B(ii)	-	-	HMDB0245002	M+ACN+H	C6H7N5O	6.0276	-	-	pos	-	-	-	-	Organoheterocyclic compounds	Imidazopyrimidines	207.099	0.0543198344315	0	72.9	-2.1439	-	Purines and purine derivatives	4.814	4.786	4.849	4.729	4.798	4.783	4.882	4.812	4.798	4.81	4.797	4.724	4.821	4.827	4.823	4.841	4.712	4.68	5.297	4.851	4.781	4.767	4.799
pos_7786	Decanoylcarnitine	癸酰肉碱	metab_7927	B(i)	-	-	LMFA07070059;HMDB0000651	M+H	C17H33NO4	6.0223	-	C03299	pos	-	-	-	-	Lipids and lipid-like molecules	Fatty Acyls	316.248	0.0957931779933	80.6	0	-2.21337	1492-27-9	Fatty acid esters	4.711	4.689	4.657	4.639	4.752	4.687	4.783	4.948	4.608	4.604	4.636	4.845	4.687	4.829	4.706	4.836	4.915	4.517	5.227	4.952	4.826	4.786	4.693
pos_7824	PI(PGE1/22:3(10Z,13Z,16Z))	-	metab_7970	B(ii)	-	-	HMDB0277887	M+H+Na	C52H89O16P	6.0118	-	-	pos	-	-	-	-	Not Available	Not Available	512.289	0.0344511820519	0	37.4	-6.60878	-	Not Available	5.622	5.722	5.735	5.778	5.638	5.735	5.353	5.711	5.73	5.706	5.801	5.684	5.708	5.816	5.773	5.74	5.637	5.918	3.624	5.598	5.703	5.748	5.76
pos_7830	Viloxazine	维洛沙秦	metab_7977	B(ii)	-	-	HMDB0259807	M+H-H2O	C13H19NO3	6.0118	-	-	pos	-	-	-	-	Benzenoids	Phenol ethers	220.133	0.215364	0	46.9	-1.44881	-	Not Available	3.936	3.651	3.889	3.778	3.876	3.767	3.821	3.854	3.799	3.898	4.001	3.84	3.827	3.847	3.83	3.836	3.751	3.633	4.195	3.883	3.897	3.848	3.638
pos_7851	RHODAMINE 6G	罗丹明6G	metab_8000	B(ii)	-	-	HMDB0257199	M+H	C28H30N2O3	6.0065	-	C11177	pos	-	-	-	-	Organoheterocyclic compounds	Benzopyrans	443.232	0.14612	0	62.8	-1.44132	989-38-8	1-benzopyrans	4.515	4.315	4.478	4.854	5.26	4.826	4.346	4.258	4.491	4.062	4.278	4.064	3.97	3.491	4.288	3.743	4.076	3.805	5.341	5.272	4.349	4.236	4.233
pos_7853	5-Methoxyindoleacetate	5 -甲氧基吲哚乙酸酯	metab_8002	B(ii)	map00380	Tryptophan metabolism	HMDB0004096;PW_C002060	M+H-H2O	C11H11NO3	6.0065	色氨酸代谢	C05660	pos	-	-	Metabolism	Amino acid metabolism	Organoheterocyclic compounds	Indoles and derivatives	188.07	0.0810644573124	0	88.8	-1.60156	3471-31-6	Indolyl carboxylic acids and derivatives	4.957	4.558	4.959	4.559	4.756	4.794	5.035	4.816	5.148	4.652	4.908	5.272	5.093	5.199	5.123	5.188	4.675	4.862	5.126	4.998	4.905	5.035	4.687
pos_7866	Inuline	安茴酰牛扁碱	metab_8016	B(ii)	-	-	HMDB0248466	2M+3H2O+2H	C32H46N2O8	6.0012	-	C08659	pos	-	-	-	-	Lipids and lipid-like molecules	Prenol lipids	600.342	0.0520400786676	0	33.7	8.07562973839927	22413-78-1	Diterpenoids	6.111	6.175	6.202	6.278	6.15	6.193	5.799	6.195	6.213	6.224	6.255	6.175	6.206	6.236	6.217	6.195	6.162	6.388	5.03	6.066	6.155	6.222	6.241
pos_7877	1-Hexanol	1-己醇	metab_8028	B(ii)	-	-	HMDB0012971	2M+ACN+H	C6H14O	6.0012	-	C00854	pos	-	-	-	-	Lipids and lipid-like molecules	Fatty Acyls	246.242	0.0490240508918	0	49	-2.03481	111-27-3	Fatty alcohols	4.962	4.842	4.946	4.843	5.076	5.244	4.999	4.92	4.845	4.931	4.843	4.861	4.959	4.888	4.887	4.87	4.823	4.812	5.164	4.938	4.887	4.917	4.902
pos_7933	(1(10)E,4a,5E)-1(10),5-Germacradiene-12-acetoxy-4,11-diol	（1（10）E，4a，5E）-1（10），5-Germacradiene-12-乙酰氧基-4,11-二醇	metab_8091	B(ii)	-	-	HMDB0038798	M+NH4	C17H28O4	5.9906	-	-	pos	-	-	-	-	Lipids and lipid-like molecules	Prenol lipids	314.232	0.0377516914599	0	47	-1.65353	143305-08-2	Sesquiterpenoids	4.998	4.982	5.018	5.011	5.064	5.055	5.013	5.178	5.017	4.931	4.965	4.96	5.151	5.07	5.06	5.08	5.068	5.009	5.437	5.201	5.124	5.065	5.041
pos_7964	Lycorine	石蒜碱	metab_8125	B(ii)	-	-	HMDB0254256;MJDBOTE0000964	M+CH3OH+H	C16H17NO4	5.9852	-	C08532	pos	-	-	-	-	Alkaloids and derivatives	Amaryllidaceae alkaloids	320.152	0.108013	0	57.1	9.812482187514927	476-28-8	Lycorine-type amaryllidaceae alkaloids	3.358	0.5076	5.017	4.827	4.833	4.687	4.585	0.4815	0.4923	4.499	0.5106	0.5106	0.49	0.5123	0.5035	3.823	0.5022	0.4989	5.026	0.4658	4.978	0.4828	0.5023
pos_798	Lauryldiethanolamine	月桂基二乙醇胺	metab_8141	B(i)	-	-	-	M+H, M+Na	C16H35NO2	6.0592	-	-	pos	-	-	-	-	-	-	274.274	0.0135561813117	93.7	0	-1.69455	-	-	7.221	7.164	7.221	7.146	7.234	7.337	7.227	7.181	7.165	7.148	7.156	7.165	7.172	7.143	7.209	7.175	7.183	7.112	7.479	7.217	7.199	7.169	7.175
pos_7987	Arbutin	熊果苷	metab_8149	B(ii)	map00010	Glycolysis / Gluconeogenesis	HMDB0029943;MJDBOTE0001645	M+2Na-H	C12H16O7	5.9799	糖酵解/糖原异生	C06186	pos	-	-	Metabolism	Carbohydrate metabolism	Organic oxygen compounds	Organooxygen compounds	317.06	0.0160306788938	0	44.4	-2.11323	497-76-7	Carbohydrates and carbohydrate conjugates	4.59	4.583	4.665	4.494	4.579	4.623	4.64	4.631	4.552	4.655	4.574	4.574	4.612	4.53	4.559	4.615	4.577	4.484	4.852	4.688	4.588	4.575	4.566
pos_7996	(4E,15Z)-Bilirubin	（4E，15Z）-胆红素	metab_8159	B(ii)	-	-	HMDB0000488	M+H	C33H36N4O6	5.9747	-	-	pos	-	-	-	-	Organoheterocyclic compounds	Tetrapyrroles and derivatives	585.27	0.0643504202533	0	66.8	-0.607321	69853-43-6	Bilirubins	5.334	5.203	5.34	5.341	5.451	5.345	5.21	5.469	5.439	5.375	5.455	5.256	5.429	5.283	5.278	5.291	5.388	5.299	5.478	5.183	5.344	5.452	5.245
pos_8	2,3,23-Triacetylsericic acid	2，3，23 -三乙酰丝氨酸	metab_8163	B(ii)	-	-	HMDB0034503	M+NH4, M+Na, M+H, M+H+Na, M+2H	C36H54O9	5.8259	-	-	pos	-	-	-	-	Lipids and lipid-like molecules	Prenol lipids	648.415	0.0104964905132	0	37.6	7.39908099794927	58096-15-4	Triterpenoids	6.606	6.696	6.619	6.783	6.613	6.666	6.318	6.701	6.664	6.7	6.694	6.671	6.689	6.706	6.671	6.654	6.652	6.861	3.77	6.463	6.614	6.679	6.688
pos_8017	Leucine-beta-naphthylamide	亮氨酸- β -萘甲酰胺	metab_8184	B(ii)	-	-	HMDB0247332	M+ACN+H	C16H20N2O	5.9694	-	-	pos	-	-	-	-	Organic acids and derivatives	Carboxylic acids and derivatives	298.191	0.0622040061698	0	53.3	-1.63794	-	Amino acids, peptides, and analogues	4.724	4.696	4.737	4.624	4.693	4.686	4.796	4.715	4.66	4.7	4.666	4.707	4.647	4.724	4.763	4.707	4.666	4.545	4.953	4.779	4.621	4.626	4.693
pos_804	PC(22:6(4Z,7Z,10Z,13E,15E,19Z)-OH(17)/24:1(15Z))	-	metab_8209	B(ii)	-	-	HMDB0288781	M+H+Na, M+2Na	C54H94NO9P	6.0856	-	-	pos	-	-	-	-	Not Available	Not Available	477.831	0.0868811	0	55.1	-0.686616	-	Not Available	6.084	6.123	6.006	6.105	6.089	6.054	5.945	6.061	6.023	6.096	6.084	6.112	6.044	6.079	6.066	6.009	6.093	6.045	4.688	5.989	6.005	6.037	6.032
pos_8069	4'-Hydroxyfenoprofen glucuronide	4 ' -羟基芬洛芬葡萄糖醛酸苷	metab_8241	B(ii)	-	-	HMDB0060772	M+H	C21H22O10	5.9535	-	-	pos	-	-	-	-	Benzenoids	Benzene and substituted derivatives	435.128	0.170898	0	50.6	-1.90451	-	Diphenylethers	4.623	4.121	4.369	3.934	4.083	4.24	4.295	4.251	3.91	4.402	4.471	3.967	4.621	4.485	4.469	4.492	4.359	4.372	4.906	4.212	4.082	4.707	4.286
pos_8070	SM(d19:1/20:4(8Z,11Z,14Z,17Z)-2OH(5S,6R))	-	metab_8243	B(ii)	-	-	HMDB0290697	M+2Na	C44H81N2O8P	5.9535	-	-	pos	-	-	-	-	Not Available	Not Available	421.277	0.0385363657493	0	31.9	3.00875050729796	-	Not Available	6.193	6.282	6.22	6.317	6.194	6.251	5.922	6.248	6.243	6.272	6.263	6.251	6.262	6.28	6.251	6.257	6.236	6.372	2.646	6.141	6.222	6.256	6.292
pos_8095	Methysergide	二甲麦角新碱	metab_8270	B(ii)	-	-	HMDB0014392	M+Na	C21H27N3O2	5.9429	-	C07199	pos	-	-	-	-	Alkaloids and derivatives	Ergoline and derivatives	376.201	0.0890452151392	0	57.5	4.7937	361-37-5	Lysergic acids and derivatives	4.667	4.552	4.683	4.399	4.601	4.622	4.794	4.625	4.573	4.7	4.556	4.571	4.704	4.541	4.603	4.648	4.626	4.473	5.055	4.8	4.673	4.564	4.592
pos_8098	(E)-2-Hydroxy-N-desmethyldoxepin	（E） -2-羟基-N-去甲基多塞平	metab_8273	B(ii)	-	-	HMDB0060699;PW_C040605	2M+NH4	C18H19NO2	5.9429	-	-	pos	-	-	-	-	Organoheterocyclic compounds	Benzoxepines	580.317	0.0113861149915	0	31.9	-0.260508	-	Dibenzoxepines	5.773	5.849	5.769	5.87	5.713	5.783	5.459	5.794	5.776	5.822	5.796	5.819	5.817	5.811	5.781	5.77	5.762	5.914	5.646	5.654	5.741	5.767	5.816
pos_8106	L-4-Chlorotryptophan	L - 4 -氯色氨酸	metab_8283	B(ii)	-	-	HMDB0030400	M+H	C11H11ClN2O2	5.9429	-	-	pos	-	-	-	-	Organoheterocyclic compounds	Indoles and derivatives	239.058	0.0375299045482	0	62.6	-1.64414	52448-14-3	Indolyl carboxylic acids and derivatives	3.883	5.315	3.483	3.296	4.524	4.473	5.641	3.799	3.59	4.962	3.711	5.144	3.814	3.902	5.428	4.905	4.775	3.281	4.115	5.663	4.526	4.882	4.363
pos_8116	Liquiritigenin	甘草素	metab_8294	B(ii)	map01100	Metabolic pathways	LMPK12140061;HMDB0029519;MJDBOTE0001096	M+CH3OH+H	C15H12O4	5.9376	代谢途径	C09762	pos	-	-	Metabolism	Global and overview maps	Phenylpropanoids and polyketides	Flavonoids	289.107	0.100157	0	50.6	0.0589266751562276	578-86-9	Flavans	5.283	4.548	5.048	4.739	4.815	4.96	5.127	4.817	4.795	5.339	5.405	5.091	5.145	4.984	5.145	5.366	4.971	4.868	5.092	5.072	4.796	5.151	4.641
pos_8123	Withaferin A	醉茄素A	metab_8302	B(ii)	-	-	HMDB0259897;LMST01160017	M+CH3OH+H	C28H38O6	5.9324	-	C08841	pos	-	-	-	-	Lipids and lipid-like molecules	Steroids and steroid derivatives	503.304	0.110822	0	53.9	8.56342502987354	5119-48-2	Steroid lactones	5.905	6.053	5.945	6.081	5.944	5.993	5.558	6.015	5.985	5.977	5.993	5.905	6.006	6.014	5.983	5.934	5.969	6.14	5.745	5.798	5.84	5.994	5.917
pos_8131	Desmethylnortriptyline	-	metab_8311	B(ii)	-	-	HMDB0060531	2M+NH4	C18H19N	5.9271	-	-	pos	-	-	-	-	Organoheterocyclic compounds	Diazanaphthalenes	516.337	0.0311696361611	0	45.9	-0.851142	4444-42-2	Benzodiazines	7.233	7.32	7.179	7.302	7.138	7.236	6.876	7.288	7.278	7.275	7.295	7.278	7.31	7.314	7.315	7.285	7.275	7.402	3.576	7.153	7.205	7.293	7.304
pos_8179	4-Chlorobenzaldehyde	对氯苯甲醛	metab_8363	B(ii)	-	-	HMDB0246392	M+ACN+H	C7H5ClO	5.9112	-	C06648	pos	-	-	-	-	Benzenoids	Benzene and substituted derivatives	182.036	0.0957089924549	0	31.3	-2.01638	104-88-1	Benzoyl derivatives	3.384	4.42	3.076	2.803	3.867	3.92	4.712	3.286	2.78	4.176	2.806	4.224	3.181	3.399	4.453	4.124	4.11	2.789	3.729	4.781	3.859	4.112	3.741
pos_8201	PC(PGD2/15:0)	-	metab_8389	B(ii)	-	-	HMDB0285819	M+H+Na	C43H78NO11P	5.9005	-	-	pos	-	-	-	-	Not Available	Not Available	419.762	0.0502918199422	0	40.7	-3.99512	-	Not Available	5.225	5.4	5.234	5.449	5.242	5.235	4.894	5.403	5.356	5.354	5.317	5.298	5.39	5.371	5.42	5.367	5.298	5.456	5.082	5.197	5.347	5.402	5.379
pos_8204	3,9-Dimethyl-6-(1-methylethyl)-1,4-dioxaspiro[4.5]decan-2-one	3,9-二甲基-6-（1-甲基乙基）-1,4-二氧杂螺[4.5]癸-2-酮	metab_8392	B(ii)	-	-	HMDB0303222	M+ACN+H	C13H22O3	5.9005	-	-	pos	-	-	-	-	Lipids and lipid-like molecules	Prenol lipids	268.19	0.0464922490121	0	57.3	-1.83687	-	Terpene lactones	5.372	5.369	5.366	5.289	5.394	5.347	5.451	5.321	5.36	5.342	5.334	5.35	5.345	5.338	5.346	5.337	5.317	5.263	5.625	5.405	5.357	5.319	5.348
pos_8211	PG(PGJ2/18:0)	-	metab_8400	B(ii)	-	-	HMDB0268796	M+2H	C44H77O12P	5.8953	-	-	pos	-	-	-	-	Not Available	Not Available	415.267	0.172899	0	31.2	5.80144536414963	-	Not Available	5.291	5.374	5.371	5.516	5.312	5.319	5.107	5.402	5.4	5.352	5.402	5.436	5.324	5.399	5.371	5.36	5.37	5.537	4.204	5.253	5.377	5.381	5.464
pos_8229	(+)-Mahanimbine	（+）-马海宁	metab_8419	B(ii)	-	-	HMDB0030318	2M+NH4	C23H25NO	5.8846	-	C09220	pos	-	-	-	-	Organoheterocyclic compounds	Indoles and derivatives	680.423	0.112516	0	45.1	2.9807239041717595	21104-28-9	Carbazoles	5.031	5.163	5.061	5.271	5.021	5.055	4.726	5.177	5.119	5.184	5.128	5.137	5.069	5.208	5.153	5.107	5.09	5.329	4.914	4.918	5.061	5.144	5.113
pos_8252	Fumonisin AK1	伏马毒素AK1	metab_8445	B(ii)	-	-	HMDB0033397	M+CH3OH+H	C30H53NO11	5.874	-	-	pos	-	-	-	-	Organic acids and derivatives	Carboxylic acids and derivatives	636.397	0.0875257949251	0	39.8	3.05449565352915	170591-49-8	Tricarboxylic acids and derivatives	4.801	4.977	4.919	5.058	4.871	4.821	4.531	4.909	4.974	4.904	4.945	4.946	4.873	4.915	4.9	4.839	4.891	5.038	3.685	4.549	4.818	4.92	4.992
pos_8253	Ne,Ne dimethyllysine	Ne，Ne二甲基赖氨酸	metab_8446	B(ii)	map01100;map00310	Metabolic pathways;Lysine degradation	HMDB0013287	2M+ACN+Na	C8H18N2O2	5.874	代谢途径;赖氨酸降解	C05545	pos	-	-	Metabolism;Metabolism	Global and overview maps;Amino acid metabolism	Organic acids and derivatives	Carboxylic acids and derivatives	412.29	0.257444	0	34.1	0.64976050870758	-	Amino acids, peptides, and analogues	5.69	5.809	5.71	5.808	5.617	5.705	5.36	5.681	5.638	5.655	5.672	5.647	5.623	5.702	5.606	5.576	5.638	5.792	5.547	5.452	5.544	5.652	5.653
pos_8255	SM(d17:2(4E,8Z)/22:6(5Z,7Z,10Z,13Z,16Z,19Z)-OH(4))	-	metab_8448	B(ii)	-	-	HMDB0290438	M+H+Na	C44H75N2O7P	5.874	-	-	pos	-	-	-	-	Not Available	Not Available	399.264	0.0378981915835	0	49.7	-0.320853	-	Not Available	5.686	5.8	5.712	5.849	5.689	5.755	5.389	5.765	5.741	5.788	5.792	5.774	5.756	5.772	5.801	5.761	5.766	5.94	5.576	5.589	5.715	5.8	5.76
pos_8256	Pro Thr	脯氨酸 苏氨酸	metab_8449	B(i)	-	-	-	M+H	C9H16N2O4	5.874	-	-	pos	-	-	-	-	-	-	217.118	0.0576234708434	41.5	0	-1.65595	-	-	4.346	4.361	4.36	4.346	4.406	4.387	4.383	4.284	4.499	4.391	4.28	4.278	4.379	4.365	4.345	4.328	4.339	4.31	4.55	4.414	4.392	4.322	4.519
pos_8258	(+/-)-Enterolactone	（+/-）-肠内酯	metab_8451	B(i)	-	-	HMDB0006101	M+H	C18H18O4	5.874	-	C18165	pos	-	-	-	-	Lignans, neolignans and related compounds	Furanoid lignans	299.127	0.139647	74.7	0	-1.50828	185254-87-9	Tetrahydrofuran lignans	4.344	4.388	3.486	3.855	4.447	4.284	4.534	4.244	4.596	4.505	4.571	4.172	4.271	4.143	4.352	4.617	4.501	3.63	4.28	4.226	4.235	4.566	3.484
pos_8294	DI(Hydroxyethyl)ether	二（羟乙基）醚	metab_8490	B(ii)	-	-	HMDB0251245	M+H	C4H10O3	5.8528	-	C14689	pos	-	-	-	-	Organic oxygen compounds	Organooxygen compounds	107.07	0.0460851	0	52	-1.41739	-	Ethers	3.922	3.903	3.949	3.842	3.876	3.929	3.946	3.895	3.939	3.96	3.893	3.901	3.869	3.881	3.943	3.855	3.86	3.814	4.092	3.912	3.893	3.856	3.871
pos_8312	Diminazene	重氮苯脒	metab_8511	B(ii)	-	-	HMDB0251412	2M+Na	C14H15N7	5.8313	-	C18388	pos	-	-	-	-	Benzenoids	Benzene and substituted derivatives	585.27	0.0748118430104	0	43.3	4.80562700152376	536-71-0	Phenylhydrazines	4.765	4.606	4.768	4.744	4.949	4.782	4.696	4.994	4.887	4.851	4.995	4.722	4.889	4.723	4.828	4.785	4.873	4.8	5.023	4.743	4.865	5.012	4.703
pos_8319	PGP(i-13:0/a-15:0)	-	metab_8518	B(ii)	map01100;map00564	Metabolic pathways;Glycerophospholipid metabolism	HMDB0116550;PW_C076355	M+2Na-H	C34H68O13P2	5.8259	代谢途径;甘油磷脂代谢	C03892	pos	-	-	Metabolism;Metabolism	Global and overview maps;Lipid metabolism	Lipids and lipid-like molecules	Glycerophospholipids	791.39	0.0729378380746	0	53	7.79247190807209	-	Glycerophosphoglycerophosphates	5.071	4.957	5.022	5.188	5.342	5.132	4.998	5.267	5.232	4.631	4.926	4.764	5.41	4.744	5.055	5.338	4.966	5.362	4.912	5.029	5.299	5.125	5.1
pos_8322	4-(Dimethylamino)butyl carbamimidothioate	4-（二甲氨基）丁基氨基甲酸酯	metab_8522	B(ii)	-	-	HMDB0246305	2M+NH4	C7H17N3S	5.8259	-	-	pos	-	-	-	-	Organosulfur compounds	Isothioureas	368.264	0.193571	0	33.5	3.36489158730233	-	Not Available	5.737	5.858	5.747	5.885	5.696	5.749	5.386	5.79	5.697	5.744	5.742	5.737	5.705	5.784	5.698	5.664	5.72	5.886	5.573	5.494	5.627	5.721	5.717
pos_8326	Azimexon	-	metab_8526	B(ii)	-	-	HMDB0248804	M+H-H2O	C9H14N4O	5.8259	-	-	pos	-	-	-	-	Organic acids and derivatives	Carboxylic acids and derivatives	177.112	0.0102462107085	0	53.7	-8.32407	-	Amino acids, peptides, and analogues	4.986	5.117	5.052	5.164	5.025	5.055	4.733	5.11	5.036	5.106	5.105	5.087	5.095	5.14	5.076	5.03	5.049	5.223	4.921	4.889	5.019	5.09	5.101
pos_8350	HMDB0241069	-	metab_8553	B(ii)	-	-	-	M+H	C24H45N2O6+	5.8091	-	-	pos	-	-	-	-	-	-	458.331	0.275991	0	34.2	-7.75468	-	-	4.454	4.54	4.451	4.553	4.446	4.477	3.867	4.481	4.362	4.452	4.428	4.305	4.399	4.487	4.288	4.298	4.396	4.618	4.054	4.016	4.207	4.417	4.308
pos_8351	Gabapentin enacarbil	-	metab_8554	B(ii)	-	-	HMDB0252567	M+NH4	C16H27NO6	5.8091	-	-	pos	-	-	-	-	Organic acids and derivatives	Carboxylic acids and derivatives	347.217	0.117708	0	38.4	-2.56512	-	Amino acids, peptides, and analogues	4.68	4.646	4.666	4.649	4.707	4.677	4.71	4.644	4.651	4.702	4.657	4.636	4.645	4.676	4.66	4.688	4.662	4.608	4.857	4.731	4.696	4.648	4.728
pos_8352	Prilocaine	丙胺卡因	metab_8555	B(ii)	-	-	PW_C009221;HMDB0014888;MJDBOTE0000873	M+CH3OH+H	C13H20N2O	5.8091	-	C07531	pos	-	-	-	-	Organic acids and derivatives	Carboxylic acids and derivatives	253.191	0.0330685490115	0	35.3	-1.73794	721-50-6	Amino acids, peptides, and analogues	4.734	4.703	4.734	4.684	4.739	4.731	4.744	4.694	4.695	4.745	4.692	4.726	4.714	4.708	4.729	4.707	4.676	4.654	4.849	4.755	4.729	4.677	4.737
pos_838	3,4-Dimethyl-5-pentyl-2-furanpropanoic acid	3，4 -二甲基- 5 -戊基- 2 -呋喃丙酸	metab_8585	B(ii)	-	-	HMDB0112083;LMFA01150023	M+H-H2O, M+Na	C14H22O3	6.1119	-	-	pos	-	-	-	-	Lipids and lipid-like molecules	Fatty Acyls	261.148	0.111722	0	46.2	8.12245172731263	116627-39-5	Fatty acids and conjugates	4.738	4.99	4.436	4.501	4.802	4.697	4.376	5.232	5.63	4.161	4.609	4.209	5.023	4.546	4.44	4.807	5.084	4.576	4.955	4.423	4.376	4.095	4.437
pos_8418	3,11,12-Trihydroxy-1(10)-spirovetiven-2-one	3,11,12-三羟基-1（10）-螺维酮-2-酮	metab_8628	B(ii)	-	-	HMDB0038154	M+NH4	C15H24O4	5.7613	-	-	pos	-	-	-	-	Lipids and lipid-like molecules	Prenol lipids	286.201	0.105585	0	36.6	-1.54296	84321-96-0	Sesquiterpenoids	4.805	4.551	4.835	4.711	4.972	4.806	4.76	5.048	4.849	4.539	5	5.036	5.062	4.878	4.97	4.906	5.123	5.114	4.868	5.169	5.072	5.122	4.857
pos_8423	3-Phenylbutyric acid	3 -苯丁酸	metab_8634	B(ii)	-	-	HMDB0001955	M+CH3OH+H	C10H12O2	5.7507	-	-	pos	-	-	-	-	Phenylpropanoids and polyketides	Phenylpropanoic acids	197.117	0.0841825147694	0	41.8	-1.88836	4593-90-2	Not Available	4.085	3.635	3.947	3.951	4.053	3.983	3.709	4.008	4.055	4.167	3.766	3.958	3.951	4.015	3.844	3.887	3.753	3.89	4.386	3.84	3.974	3.841	3.428
pos_8437	Quinoline-4,8-diol	喹啉- 4，8 -二醇	metab_8649	B(ii)	map00380	Tryptophan metabolism	HMDB0060289	M+H	C9H7NO2	5.7294	色氨酸代谢	C05637	pos	-	-	Metabolism	Amino acid metabolism	Organoheterocyclic compounds	Quinolines and derivatives	162.055	0.0690806952786	0	76.2	-1.58971	-	Quinolones and derivatives	4.105	4.221	2.49	4.053	3.689	3.938	4.36	4.071	2.574	3.513	3.69	3.947	3.945	4.314	3.966	4.294	4.111	4.422	4.011	3.953	4.143	3.759	3.337
pos_844	Taurohyocholic Acid	牛磺猪胆酸	metab_8652	B(i)	-	-	LMST05040010;HMDB0011637;MJDBDZS0000018	M+H-2H2O, M+H	C26H45NO7S	6.1172	-	C15516	pos	-	-	-	-	Lipids and lipid-like molecules	Steroids and steroid derivatives	480.277	0.0247572044721	70.9	0	-1.42624	117997-17-8	Bile acids, alcohols and derivatives	5.008	5.822	5.343	4.829	5.038	5.256	5.788	5.033	5.297	5.584	5.179	5.117	5.319	5.397	5.086	5.319	5.339	5.513	5.837	5.494	6.15	6.196	5.326
pos_8444	Ethyl lysine	乙基赖氨酸	metab_8657	B(ii)	-	-	HMDB0252051	M+H-H2O	C8H18N2O2	5.7188	-	-	pos	-	-	-	-	Organic acids and derivatives	Carboxylic acids and derivatives	157.133	0.0697209149223	0	32	-1.43423	-	Amino acids, peptides, and analogues	4.089	4.046	4.028	4.08	4.054	4.073	4.059	3.995	4.055	4.068	4.058	4.024	4.077	4.053	4.063	4.014	4.015	3.992	4.209	4.09	4.065	4.007	4.065
pos_8454	Withaperuvin H	睡茄灯笼草素H	metab_8668	B(ii)	-	-	HMDB0034061	M+H-H2O	C30H42O9S	5.6922	-	-	pos	-	-	-	-	Lipids and lipid-like molecules	Steroids and steroid derivatives	561.251	0.185151	0	33.4	-1.90917	-	Steroid lactones	4.262	3.949	4.322	4.277	4.459	4.29	4.356	4.565	4.419	4.134	4.299	4.327	4.338	4.472	4.425	4.607	4.609	4.374	4.418	4.492	4.597	4.442	4.559
pos_8457	Atrimustine	阿特莫司汀	metab_8671	B(ii)	-	-	HMDB0248715	M+ACN+Na	C41H47Cl2NO6	5.6869	-	-	pos	-	-	-	-	Lipids and lipid-like molecules	Steroids and steroid derivatives	783.293	0.0259246461423	0	49.5	-1.17846	-	Steroid esters	5.688	5.653	5.734	5.714	5.77	5.735	5.741	5.876	5.802	5.562	5.674	5.71	5.727	5.761	5.768	5.876	5.853	5.785	5.791	5.806	5.866	5.827	5.836
pos_8469	1,2,3,4-Tetrahydronaphthalene	1，2，3，4 -四氢萘	metab_8684	B(ii)	-	-	HMDB0244120	M+H	C10H12	5.6762	-	C14114	pos	-	-	-	-	Benzenoids	Tetralins	133.101	0.0482652453699	0	30.7	-1.25685	119-64-2	Not Available	3.928	3.71	4.091	3.773	3.86	3.866	3.967	4.067	3.934	3.768	3.965	3.871	3.963	4.182	3.663	3.977	3.499	3.934	3.908	3.808	3.745	3.837	3.645
pos_8473	Kainic acid	红藻氨酸	metab_8689	B(ii)	-	-	HMDB0253757	M+H-2H2O	C10H15NO4	5.6601	-	C12819	pos	-	-	-	-	Organic acids and derivatives	Carboxylic acids and derivatives	178.086	0.0404104710856	0	67.1	-1.22036	487-79-6	Amino acids, peptides, and analogues	4.459	4.048	4.276	4.077	4.556	4.332	4.421	4.331	4.521	4.325	4.563	4.886	4.771	4.864	4.752	4.509	4.187	4.542	4.526	4.576	4.43	4.637	4.073
pos_8511	5-Cholesten-3beta-25-diol-3-sulfate	5-胆甾烷-3β-25-二醇-3-硫酸酯	metab_8732	B(ii)	-	-	HMDB0259391	M+NH4	C27H46O5S	5.6016	-	-	pos	-	-	-	-	Lipids and lipid-like molecules	Steroids and steroid derivatives	500.342	0.211837	0	34.4	3.5209848071454104	-	Cholestane steroids	5.32	5.414	5.297	5.424	5.291	5.315	4.904	5.324	5.305	5.304	5.264	5.249	5.226	5.311	5.209	5.196	5.27	5.449	5.091	5.013	5.144	5.263	5.24
pos_8535	9-Hydroxylinoleic acid	9 -羟基亚油酸	metab_8758	B(ii)	map00591;map03320	Linoleic acid metabolism;PPAR signaling pathway	HMDB0247599;HMDB0062652;HMDB0004670	M+Na	C18H32O3	5.5588	亚油酸代谢;PPAR信号通路	C14767	pos	-	-	Metabolism;Organismal Systems	Lipid metabolism;Endocrine system	Lipids and lipid-like molecules	Fatty Acyls	319.222	0.136016	0	53.8	-8.06499	98524-19-7;73543-67-6	Lineolic acids and derivatives	4.951	4.923	4.98	4.899	4.957	4.949	4.931	4.932	4.906	4.948	4.972	5	4.941	5.017	4.998	5.019	4.989	4.901	5.148	5.041	4.959	4.943	5.025
pos_8542	N(2)-phenylacetyl-L-glutaminate	N（2）-苯乙酰基-L-谷氨酰胺	metab_8766	B(ii)	-	-	HMDB0062645	M+H-H2O	C13H16N2O4	5.5481	-	C05597	pos	-	-	-	-	Organic acids and derivatives	Carboxylic acids and derivatives	247.107	0.118514	0	40.2	-1.38929	-	Amino acids, peptides, and analogues	4.777	4.297	4.546	4.48	4.843	4.647	4.66	4.555	4.548	4.676	4.833	4.891	4.738	5.14	4.817	4.787	4.749	4.661	5.119	4.767	4.669	4.488	4.539
pos_8569	Obacunone	奥巴叩酮	metab_8795	B(ii)	-	-	HMDB0035858;MJDBOTE0000934	M+ACN+Na	C26H30O7	5.4947	-	C08775	pos	-	-	-	-	Lipids and lipid-like molecules	Prenol lipids	518.216	0.0112106743726	0	37.6	1.96750901137465	751-03-1	Triterpenoids	5.156	5.473	5.447	5.382	4.246	5.286	5.114	4.942	4.94	5.245	5.28	5.32	4.957	5.343	5.255	4.976	5.346	4.085	5.442	4.942	4.672	4.724	5.195
pos_8594	Deoxyvasicinone	去氧鸭嘴花酮碱	metab_8823	B(i)	-	-	-	M+H	C11H10N2O	5.4682	-	C10659	pos	-	-	-	-	-	-	187.086	0.114297	39.4	0	-1.64776	530-53-0	-	2.471	3.999	1.991	1.998	3.619	3.361	4.437	2.22	1.975	3.894	2.114	4.12	2.919	3.373	4.274	4.079	3.971	1.984	3.116	4.562	3.576	3.855	3.581
pos_8604	Alpha-CEHC	-	metab_8835	B(ii)	-	-	HMDB0246646;HMDB0001518	M+Na	C16H22O4	5.4469	-	-	pos	-	-	-	-	Organoheterocyclic compounds	Benzopyrans	301.141	0.0375293716951	0	32.5	-1.68776	4072-32-6	1-benzopyrans	4.865	4.852	4.846	4.848	4.898	4.852	4.898	4.836	4.877	4.869	4.837	4.809	4.871	4.819	4.853	4.858	4.836	4.87	4.973	4.832	4.837	4.829	4.844
pos_8613	DG(18:3(9,11,15)-OH(13)/0:0/i-14:0)	-	metab_8845	B(ii)	-	-	HMDB0298908	M+CH3OH+H	C35H62O6	5.4309	-	-	pos	-	-	-	-	Not Available	Not Available	611.485	0.0974998973877	0	30.2	-6.25628	-	Not Available	5.827	5.82	5.807	5.765	5.797	5.804	5.799	5.754	5.762	5.789	5.744	5.763	5.725	5.738	5.752	5.741	5.748	5.742	5.895	5.775	5.728	5.731	5.762
pos_8617	Azimsulfuron	四唑嘧磺隆	metab_8849	B(ii)	-	-	HMDB0033145	M+Na	C13H16N10O5S	5.4256	-	C18438	pos	-	-	-	-	Organic nitrogen compounds	Organonitrogen compounds	447.092	0.113159	0	45.9	-0.675522	120162-55-2	Sulfonylureas	5.064	4.939	5.102	4.597	4.943	4.974	4.852	4.578	4.81	5.262	5.136	4.918	4.721	5.407	4.898	4.925	4.894	3.64	5.274	4.751	5.127	4.292	5.203
pos_8652	Attcpl-LHRH	-	metab_8888	B(ii)	-	-	HMDB0248718	M+2H	C71H94ClN17O13	5.3668	-	-	pos	-	-	-	-	Organic acids and derivatives	Carboxylic acids and derivatives	714.845	0.0625036020599	0	66.7	-9.94692	-	Amino acids, peptides, and analogues	5.465	5.531	5.564	5.487	5.448	5.516	5.605	5.625	5.482	5.518	5.675	5.562	5.57	5.714	5.579	5.692	5.686	5.597	5.733	5.78	5.679	5.676	5.611
pos_8656	Tyrosyl-Serine	酪氨酰基丝氨酸	metab_8892	B(ii)	-	-	HMDB0029114	M+H-H2O	C12H16N2O5	5.3615	-	-	pos	-	-	-	-	Organic acids and derivatives	Carboxylic acids and derivatives	251.102	0.0610546950398	0	42.7	-1.36246	-	Amino acids, peptides, and analogues	4.006	4.216	3.833	3.865	4.08	4.025	4.586	3.937	3.839	4.303	4.059	4.43	4.23	4.079	4.474	4.479	4.452	3.985	4.02	4.704	4.025	4.235	4.187
pos_8661	2-Hydroxyquinoline	2-羟基喹啉	metab_8898	B(i)	-	-	-	M+H	C9H7NO	5.3561	-	C06338	pos	-	-	-	-	-	-	146.06	0.0503045388849	54.8	0	-1.30177	70254-42-1	-	3.897	4.081	2.091	3.942	3.803	3.86	4.055	3.974	3.65	3.795	3.652	3.901	4.101	4.166	3.914	4.071	3.972	3.951	4.078	3.955	3.966	3.721	3.922
pos_8670	1,3,5-Triazine-2,4-diamine	1，3，5 -三嗪- 2，4 -二胺	metab_8908	B(ii)	-	-	HMDB0244185	M+ACN+H	C3H5N5	5.3455	-	-	pos	-	-	-	-	Organoheterocyclic compounds	Triazines	153.088	0.0260986352702	0	40.5	-2.04465	-	1,3,5-triazines	4.759	4.738	4.752	4.717	4.728	4.748	4.74	4.715	4.762	4.764	4.729	4.726	4.735	4.742	4.762	4.725	4.719	4.722	4.867	4.746	4.745	4.717	4.754
pos_8673	Taurin	[3S-(3Α,3AΑ,5AΒ,9BΒ)]-3A,5,5A,7,8,9B-六氢-3,5A,9-三甲基-萘并[1,2-B]呋喃-2,6(3H,4H)-二酮	metab_8911	B(ii)	-	-	HMDB0258736	M+H-2H2O	C15H20O3	5.3401	-	-	pos	-	-	-	-	Lipids and lipid-like molecules	Prenol lipids	213.128	0.0717351649257	0	33.4	2.23408668355819	-	Terpene lactones	4.544	4.589	4.581	4.508	4.562	4.577	4.653	4.547	4.613	4.614	4.523	4.599	4.543	4.618	4.646	4.588	4.612	4.54	4.712	4.712	4.588	4.591	4.587
pos_8675	Sucrose	蔗糖	metab_8913	B(i)	map01100;map04973;map02010;map00052;map00500;map04742	Metabolic pathways;Carbohydrate digestion and absorption;ABC transporters;Galactose metabolism;Starch and sucrose metabolism;Taste transduction	PW_C000177;HMDB0000258	M+Na	C12H22O11	5.3348	代谢途径;碳水化合物的消化和吸收;ABC转运器;半乳糖代谢;淀粉和蔗糖代谢;味觉转导	C00089	pos	Carbohydrates	Oligosaccharides	Metabolism;Organismal Systems;Environmental Information Processing;Metabolism;Metabolism;Organismal Systems	Global and overview maps;Digestive system;Membrane transport;Carbohydrate metabolism;Carbohydrate metabolism;Sensory system	Organic oxygen compounds	Organooxygen compounds	365.105	0.268215	69.3	0	-1.7497	57-50-1	Carbohydrates and carbohydrate conjugates	4.776	4.774	4.913	4.817	4.67	4.866	4.73	4.836	5.005	4.852	4.734	4.804	4.968	5.023	5.012	4.849	4.993	4.89	5.23	4.861	5.028	4.874	4.954
pos_8677	N-Acetyl-L-phenylalanine	N -乙酰- L -苯丙氨酸	metab_8915	B(i)	map01100;map00360	Metabolic pathways;Phenylalanine metabolism	HMDB0000512	M+H	C11H13NO3	5.3348	代谢途径;苯丙氨酸代谢	C03519	pos	-	-	Metabolism;Metabolism	Global and overview maps;Amino acid metabolism	Organic acids and derivatives	Carboxylic acids and derivatives	208.097	0.163161	85.5	0	-1.34912	2018-61-3	Amino acids, peptides, and analogues	3.981	3.913	3.892	4.012	4.162	4.017	4.229	4.152	4.089	3.944	4.064	4.146	4.192	4.113	4.364	4.118	4.157	4.114	4.05	4.107	4.335	4.067	3.807
pos_8678	Loliolide	黑麦草内酯	metab_8916	B(i)	-	-	HMDB0302428	M+H	C11H16O3	5.3348	-	-	pos	-	-	-	-	Organoheterocyclic compounds	Benzofurans	197.117	0.111297	80.6	0	-1.51682	-	Not Available	3.76	3.784	3.831	3.733	3.98	3.851	3.78	4.037	3.688	3.928	3.97	3.837	3.926	4.171	3.709	3.961	3.876	3.835	3.979	3.874	3.818	3.816	4.021
pos_8688	Mauritine A	毛里求斯A	metab_8927	B(ii)	-	-	HMDB0029338	M+ACN+H	C32H41N5O5	5.3241	-	-	pos	-	-	-	-	Organic acids and derivatives	Carboxylic acids and derivatives	617.349	0.198256	0	47.5	8.48022982677696	38478-72-7	Amino acids, peptides, and analogues	4.804	4.705	4.806	4.456	4.309	4.644	4.899	4.523	4.595	4.02	4.671	4.903	4.486	4.786	4.349	4.965	4.983	4.661	4.457	5.191	4.575	4.766	4.849
pos_8689	CL(8:0/8:0/i-12:0/16:0)	-	metab_8928	B(ii)	-	-	HMDB0116940	M+2Na	C53H102O17P2	5.3241	-	-	pos	-	-	-	-	Lipids and lipid-like molecules	Glycerophospholipids	559.321	0.210684	0	37.4	3.91837019455365	-	Glycerophosphoglycerophosphoglycerols	4.465	4.386	4.627	4.078	3.271	4.259	4.343	3.667	3.893	4.658	4.685	4.666	3.927	4.633	4.396	4.053	4.184	3.283	4.837	4.154	3.261	3.618	4.732
pos_8695	Kyotorphin	京都肽	metab_8935	B(ii)	-	-	HMDB0005768;HMDB0029099	M+ACN+H	C15H23N5O4	5.3188	-	C02993	pos	-	-	-	-	Organic acids and derivatives	Carboxylic acids and derivatives	379.207	0.123725	0	34.5	-6.4967	70904-56-2	Amino acids, peptides, and analogues	4.838	4.816	4.953	4.804	4.653	4.842	4.695	4.831	5.034	4.846	4.694	4.789	4.923	5.012	4.948	4.807	4.971	4.823	5.126	4.799	4.924	4.803	4.932
pos_8702	Convalloside	-	metab_8944	B(ii)	-	-	HMDB0034195	2M+3H2O+2H	C35H52O15	5.3028	-	C19986	pos	-	-	-	-	Organic nitrogen compounds	Organonitrogen compounds	726.339	0.0231916265573	0	57	-4.54045	13473-51-3	Amines	4.704	4.776	4.976	4.531	4.062	4.591	4.71	4.014	3.851	5.304	5.288	5.095	4.201	5.052	4.649	4.392	4.506	4.021	5.687	4.359	3.602	4.189	5.399
pos_8710	Mucocin	-	metab_8953	B(ii)	-	-	HMDB0031391	M+2Na	C37H66O8	5.2868	-	-	pos	-	-	-	-	Lipids and lipid-like molecules	Fatty Acyls	342.23	0.0939778325305	0	37.6	7.79787758969087	170591-47-6	Fatty alcohols	4.629	4.777	4.613	4.856	4.699	4.706	4.31	4.753	4.687	4.763	4.802	4.776	4.797	4.763	4.763	4.798	4.721	4.998	4.497	4.557	4.757	4.794	4.806
pos_8726	5-Hydroxyoctanoylcarnitine	5 -羟基辛酰肉碱	metab_8970	B(ii)	-	-	HMDB0241694	M+H	C15H29NO5	5.2545	-	-	pos	-	-	-	-	Lipids and lipid-like molecules	Fatty Acyls	304.211	0.0436070225449	0	41.1	-1.38121	-	Fatty acid esters	4.908	4.874	4.836	4.805	4.828	4.874	4.82	4.954	4.694	5.142	5.057	5.133	4.945	5.058	4.964	4.858	5.082	4.744	5.29	4.963	4.807	4.962	5.097
pos_8738	N-phenylanthranilic acid	N-苯基邻氨苯甲酸	metab_8983	B(ii)	-	-	HMDB0246312;HMDB0255225	M+H	C13H11NO2	5.2332	-	C13697	pos	-	-	-	-	Benzenoids	Benzene and substituted derivatives	214.086	0.201881	0	70	-1.31137	-	Benzoic acids and derivatives	3.714	3.633	3.799	3.765	3.582	3.756	3.657	3.418	3.437	3.66	3.851	3.609	3.888	3.941	3.612	3.63	3.6	3.687	4.133	3.509	3.747	3.772	3.994
pos_8742	CDP-DG(PGD2/i-19:0)	-	metab_8988	B(ii)	-	-	HMDB0294013	M+2H	C51H87N3O18P2	5.2279	-	-	pos	-	-	-	-	Not Available	Not Available	546.775	0.0766268237484	0	50.5	-9.50026	-	Not Available	4.664	4.778	4.926	4.826	4.59	4.753	4.935	4.799	4.57	4.254	4.936	4.816	4.731	4.51	4.814	4.846	5.059	4.564	4.611	5.147	4.874	4.875	4.551
pos_8768	SM(d18:2(4E,14Z)/PGJ2)	-	metab_9016	B(ii)	-	-	HMDB0290572	M+H+Na	C43H75N2O8P	5.164	-	-	pos	-	-	-	-	Not Available	Not Available	401.261	0.0536228234135	0	48.6	0.0124527424133636	-	Not Available	5.75	5.845	5.768	5.92	5.782	5.822	5.496	5.807	5.854	5.849	5.843	5.836	5.863	5.856	5.846	5.82	5.825	6.013	4.746	5.665	5.819	5.864	5.873
pos_8779	Licoricesaponin E2	甘草皂苷E2	metab_9028	B(ii)	-	-	HMDB0038719	M+H	C42H60O16	5.1428	-	-	pos	-	-	-	-	Lipids and lipid-like molecules	Prenol lipids	821.402	0.0561498460294	0	60.9	8.43732399288527	119418-01-8	Terpene glycosides	5.676	5.639	5.822	5.584	5.468	5.684	5.569	5.267	5.328	5.677	5.958	5.902	5.2	5.926	5.804	5.625	5.73	4.917	5.944	5.846	5.232	5.344	5.84
pos_8783	4-Piperidinone, 1-hydroxy-2,2,6,6-tetramethyl-	4 -哌啶酮，1 -羟基- 2，2，6，6 -四甲基-	metab_9033	B(i)	-	-	-	M+H	C9H17NO2	5.1375	-	-	pos	-	-	-	-	-	-	172.133	0.0377351946152	71.5	0	-1.41849	-	-	4.905	4.898	4.883	4.881	4.91	4.95	4.886	4.868	4.882	4.926	4.89	4.901	4.914	4.9	4.918	4.913	4.882	4.834	5.043	4.94	4.899	4.887	4.937
pos_8814	Hypusine	高赖氨酸	metab_9067	B(ii)	-	-	HMDB0011140;LMFA01050514	2M+NH4	C10H23N3O3	5.0735	-	-	pos	-	-	-	-	Organic acids and derivatives	Carboxylic acids and derivatives	484.385	0.118762	0	78.6	6.40700739600631	34994-11-1	Amino acids, peptides, and analogues	4.543	4.545	4.57	4.575	4.604	4.617	4.641	4.39	4.477	4.681	4.621	4.72	4.404	4.673	4.65	4.483	4.435	4.271	4.837	4.376	4.418	4.234	4.672
pos_8815	Grotan	-	metab_9068	B(ii)	-	-	HMDB0243492	2M+NH4	C9H21N3O3	5.0735	-	-	pos	-	-	-	-	Organoheterocyclic compounds	Triazinanes	456.351	0.0337513058257	0	51	2.2462615531207994	-	1,3,5-triazinanes	4.944	4.925	4.961	4.906	4.922	4.923	4.946	4.876	4.922	4.928	4.967	4.932	4.918	4.944	4.999	4.929	4.876	4.907	5.055	4.941	4.97	4.951	4.999
pos_8820	PGP(PGF1alpha/20:4(8Z,11Z,14Z,17Z))	-	metab_9074	B(ii)	-	-	HMDB0273843	M+H+Na	C46H80O16P2	5.0629	-	-	pos	-	-	-	-	Not Available	Not Available	487.245	0.0427536635825	0	74.4	0.6858241711918079	-	Not Available	5.288	5.318	5.364	5.469	5.44	5.412	5.367	5.6	5.383	5.172	5.406	5.185	5.47	5.432	5.416	5.573	5.703	5.485	5.384	5.637	5.574	5.511	5.554
pos_886	N-Ethyl trans-2-cis-6-nonadienamide	N -乙基反式- 2 -顺式- 6 -壬二烯酰胺	metab_9117	B(ii)	map01100	Metabolic pathways	HMDB0032273;LMFA08020193	M+H, M+NH4	C11H19NO	6.1594	代谢途径	C06551	pos	-	-	Metabolism	Global and overview maps	Lipids and lipid-like molecules	Fatty Acyls	199.18	0.0645373369124	0	30.8	-1.80312	608514-56-3	Fatty amides	5.193	5.187	5.262	5.164	5.167	5.192	5.249	5.107	5.224	5.195	5.197	5.159	5.153	5.128	5.213	5.178	5.168	5.149	5.645	5.27	5.126	5.18	5.174
pos_8871	2-Aminobenzoic Acid	邻氨基苯甲酸	metab_9130	B(i)	map01100;map00400;map00380;map01230	Metabolic pathways;Phenylalanine, tyrosine and tryptophan biosynthesis;Tryptophan metabolism;Biosynthesis of amino acids	PW_C000877;HMDB0001123	M+H-H2O	C7H7NO2	4.9777	代谢途径;苯丙氨酸、酪氨酸和色氨酸生物合成;色氨酸代谢;氨基酸生物合成	C00108	pos	-	-	Metabolism;Metabolism;Metabolism;Metabolism	Global and overview maps;Amino acid metabolism;Amino acid metabolism;Global and overview maps	Benzenoids	Benzene and substituted derivatives	120.044	0.0912398548802	76.2	0	-1.19387	118-92-3	Benzoic acids and derivatives	3.487	3.334	3.832	4.157	3.64	3.796	3.063	3.267	3.064	3.709	2.471	3.38	3.123	4.073	3.688	2.657	2.458	2.87	3.606	2.68	3.359	2.43	2.463
pos_8876	Leucylproline	亮氨酰脯氨酸	metab_9135	B(ii)	-	-	HMDB0011175	M+H-H2O	C11H20N2O3	4.9724	-	-	pos	-	-	-	-	Organic acids and derivatives	Carboxylic acids and derivatives	211.144	0.178056	0	75.6	-1.68732	6403-35-6	Amino acids, peptides, and analogues	4.217	4.105	4.196	3.858	4.068	4.108	3.892	4.065	3.968	4.248	4.348	3.914	4.12	4.562	4.067	3.912	4.134	3.718	4.387	3.637	3.492	3.826	4.218
pos_8883	PS(20:5(5Z,8Z,11Z,14Z,17Z)/PGJ2)	-	metab_9143	B(ii)	-	-	HMDB0282805	M+2H	C46H70NO12P	4.9512	-	-	pos	-	-	-	-	Not Available	Not Available	430.739	0.0209890808659	0	67.2	-0.301595	-	Not Available	6.499	6.506	6.473	6.409	6.509	6.495	6.422	6.597	6.367	6.232	6.532	6.448	6.518	6.486	6.517	6.543	6.6	6.481	6.354	6.774	6.471	6.475	6.581
pos_8884	Fertirelin	夫替瑞林	metab_9144	B(ii)	-	-	HMDB0252235	M+H+Na	C55H76N16O12	4.9512	-	-	pos	-	-	-	-	Organic acids and derivatives	Carboxylic acids and derivatives	588.292	0.14994	0	51.2	3.26719738748321	-	Amino acids, peptides, and analogues	4.642	4.643	4.726	4.749	4.711	4.727	4.975	5.042	4.964	4.039	4.381	4.468	4.98	4.354	4.529	5.071	4.831	5.134	4.556	5.003	5.185	5.018	4.54
pos_8897	L-Hexanoylcarnitine	L -己酰基肉碱	metab_9158	B(i)	-	-	HMDB0000756	M+H	C13H25NO4	4.9406	-	-	pos	-	-	-	-	Lipids and lipid-like molecules	Fatty Acyls	260.185	0.0506130590065	84.8	0	-1.93604	22671-29-0	Fatty acid esters	5.176	5.21	5.023	5.211	5.428	5.246	5.295	5.371	5.225	5.159	5.247	5.35	5.357	5.223	5.158	5.333	5.385	5.358	5.71	5.505	6.083	5.496	5.295
pos_8911	Quinmerac	氯甲喹啉酸	metab_9175	B(i)	-	-	HMDB0257043	M+NH4	C11H8ClNO2	4.914	-	C18891	pos	-	-	-	-	Organoheterocyclic compounds	Quinolines and derivatives	239.058	0.231521	46.2	0	-1.86375	90717-03-6	Quinoline carboxylic acids	4.245	4.027	4.246	4.091	4.226	4.162	4.183	4.24	3.837	4.233	4.298	4.117	4.269	4.308	4.012	4.288	4.253	4.216	4.214	4.154	4.146	4.139	4.238
pos_8924	PGP(i-19:0/20:4(6Z,8E,10E,14Z)-2OH(5S,12R))	-	metab_9189	B(ii)	-	-	HMDB0275547	M+H+Na	C45H82O15P2	4.8982	-	-	pos	-	-	-	-	Not Available	Not Available	474.255	0.0223421827131	0	60.4	0.552932461279816	-	Not Available	6.795	6.812	6.865	6.821	6.755	6.826	6.914	6.908	6.801	6.616	6.968	6.849	6.879	6.867	6.698	7.04	7.019	6.776	6.77	7.17	6.769	6.873	6.889
pos_8931	PS(20:4(6Z,8E,10E,14Z)-2OH(5S,12R)/16:1(9Z))	-	metab_9196	B(ii)	-	-	HMDB0281251	M+2Na	C42H72NO12P	4.8929	-	-	pos	-	-	-	-	Not Available	Not Available	429.731	0.126992	0	61.6	5.66660222134476	-	Not Available	4.841	4.86	4.881	4.835	4.762	4.737	4.953	4.883	4.799	4.68	5.09	4.847	4.915	4.954	4.766	5.091	5.031	4.564	4.793	5.307	4.724	4.945	4.884
pos_8937	Oxethazaine	羟乙卡因	metab_9202	B(ii)	-	-	HMDB0255980;HMDB0031171	M+Na	C28H41N3O3	4.8716	-	C12552	pos	-	-	-	-	Benzenoids	Benzene and substituted derivatives	490.303	0.0516490735865	0	32.3	-1.40499	183195-99-5;126-27-2	Phenethylamines	5.543	5.727	5.626	5.787	5.585	5.662	5.244	5.66	5.668	5.631	5.574	5.715	5.534	5.693	5.575	5.505	5.635	5.753	5.432	5.347	5.514	5.634	5.65
pos_8949	Lablaboside C	-	metab_9215	B(ii)	-	-	HMDB0032893	M+H+Na	C60H96O28	4.8504	-	-	pos	-	-	-	-	Lipids and lipid-like molecules	Prenol lipids	644.308	0.205635	0	47.4	8.4440062150819	209802-42-6	Terpene glycosides	5.825	5.903	5.926	5.887	6.015	5.968	6.141	6.189	6.092	5.55	5.877	5.882	6.156	5.779	6.126	6.27	6.19	6.292	5.843	6.238	6.339	6.344	5.912
pos_8961	PA(a-15:0/20:3(6,8,11)-OH(5))	-	metab_9229	B(ii)	-	-	HMDB0266997	M+2Na	C38H69O9P	4.829	-	-	pos	-	-	-	-	Not Available	Not Available	373.226	0.0839248341844	0	52.3	6.977675355601718	-	Not Available	4.865	4.988	4.959	4.741	4.77	4.885	5.019	4.253	4.541	4.413	4.89	4.907	4.487	4.752	4.661	4.925	4.978	4.834	4.264	5.283	4.58	4.855	4.8
pos_8972	4-Hydroxyphenylacetaldehyde	4 -羟基苯乙醛	metab_9241	B(ii)	map01100;map00350	Metabolic pathways;Tyrosine metabolism	HMDB0003767	M+ACN+H	C8H8O2	4.8015	代谢途径;酪氨酸代谢	C03765	pos	-	-	Metabolism;Metabolism	Global and overview maps;Amino acid metabolism	Benzenoids	Benzene and substituted derivatives	178.086	0.0453998066139	0	50.1	-2.08145	7339-87-9	Phenylacetaldehydes	2.192	4.701	2.187	2.194	4.072	3.786	5.201	2.665	2.171	4.523	2.197	4.672	2.662	3.468	4.974	4.359	4.177	2.18	3.276	5.14	4.115	4.347	3.916
pos_898	Glycylprolylarginine	-	metab_9249	B(ii)	-	-	HMDB0252828	M+H-H2O, M+H	C13H24N6O4	6.1594	-	-	pos	-	-	-	-	Organic acids and derivatives	Carboxylic acids and derivatives	329.193	0.017715	0	31.4	-1.53785	-	Amino acids, peptides, and analogues	6.048	6.03	6.11	5.979	6.031	6.04	6.101	5.977	6.018	6.017	6.014	6	5.999	6.016	6.06	6.014	5.966	5.959	6.597	6.052	6.003	5.975	5.99
pos_8981	Pretyrosine	前酪氨酸	metab_9251	B(ii)	map01100;map00400;map01230	Metabolic pathways;Phenylalanine, tyrosine and tryptophan biosynthesis;Biosynthesis of amino acids	HMDB0304809	M+H-2H2O	C10H13NO5	4.7856	代谢途径;苯丙氨酸、酪氨酸和色氨酸生物合成;氨基酸生物合成	C00826	pos	-	-	Metabolism;Metabolism;Metabolism	Global and overview maps;Amino acid metabolism;Global and overview maps	Organic acids and derivatives	Carboxylic acids and derivatives	192.065	0.0900824347623	0	59.3	-1.29293	53078-86-7	Amino acids, peptides, and analogues	4.563	4.443	4.4	4.625	4.532	4.525	4.378	4.511	4.723	4.433	4.615	4.597	4.228	4.724	4.422	4.543	4.567	4.52	4.626	4.566	4.539	4.449	4.116
pos_8983	5-Hydroxyindoleacetate	5 -羟基吲哚乙酸	metab_9253	B(i)	map01100;map04726;map00380	Metabolic pathways;Serotonergic synapse;Tryptophan metabolism	HMDB0000763	M+H-H2O	C10H9NO3	4.7856	代谢途径;5-羟色胺能突触;色氨酸代谢	C05635	pos	-	-	Metabolism;Organismal Systems;Metabolism	Global and overview maps;Nervous system;Amino acid metabolism	Organoheterocyclic compounds	Indoles and derivatives	174.055	0.0782947524569	78.7	0	-1.60392	54-16-0	Indolyl carboxylic acids and derivatives	5.049	4.898	4.94	5.11	5.031	5.014	4.908	4.996	5.149	4.945	5.138	5.096	4.791	5.207	4.915	5.064	5.057	4.996	5.094	5.06	5.026	5.013	4.651
pos_8984	8-Hydroxyquinoline	8-羟基喹啉	metab_9254	B(i)	-	-	-	M+H	C9H7NO	4.7856	-	C19434	pos	-	-	-	-	-	-	146.06	0.0420174651482	36.4	0	-1.57703	148-24-3	-	4.543	4.43	4.414	4.616	4.595	4.51	4.385	4.44	4.848	4.426	4.609	4.542	4.334	4.676	4.385	4.563	4.703	4.481	4.567	4.517	4.516	4.518	4.143
pos_9005	Arg-Thr-Lys-Arg	-	metab_9279	B(ii)	-	-	HMDB0304796	M+CH3OH+H	C22H45N11O6	4.7322	-	-	pos	-	-	-	-	Organic acids and derivatives	Carboxylic acids and derivatives	592.389	0.23402	0	69.7	0.71134983388062	-	Amino acids, peptides, and analogues	5.751	5.804	5.689	5.869	5.681	5.719	5.36	5.723	5.759	5.687	5.656	5.656	5.613	5.686	5.636	5.597	5.679	5.871	3.543	5.479	5.577	5.667	5.659
pos_9025	Acebutolol	醋丁酰心安	metab_9301	B(ii)	-	-	HMDB0015324;PW_C009606;MJDBOTE0001532	M+NH4	C18H28N2O4	4.6734	-	C06803	pos	-	-	-	-	Organic oxygen compounds	Organooxygen compounds	354.238	0.0288741	0	45.7	-1.51556	37517-30-9	Carbonyl compounds	4.924	4.93	4.943	4.903	4.948	4.939	4.949	4.899	4.927	4.977	4.917	4.944	4.905	4.923	4.966	4.922	4.909	4.857	5.063	4.922	4.909	4.914	4.928
pos_9033	Phenylacetylglycine	苯乙酰甘氨酸	metab_9310	B(i)	map00360	Phenylalanine metabolism	HMDB0000821;MJDBOTE0000576	M+H	C10H11NO3	4.6627	苯丙氨酸代谢	C05598	pos	-	-	Metabolism	Amino acid metabolism	Organic acids and derivatives	Carboxylic acids and derivatives	194.081	0.115174	75.3	0	-1.4815	500-98-1	Amino acids, peptides, and analogues	5.425	5.352	5.108	5.519	5.459	5.402	5.511	5.455	5.504	4.888	4.922	5.496	5.235	5.241	5.781	5.606	5.499	5.444	5.135	5.592	5.528	5.484	5.259
pos_9042	Etiracetam	乙拉西坦	metab_9320	B(ii)	-	-	HMDB0015333;HMDB0252105	2M+K	C8H14N2O2	4.636	-	C07841	pos	-	-	-	-	Organic acids and derivatives	Carboxylic acids and derivatives	379.175	0.11561	0	42.8	2.56495659757285	102767-28-2	Amino acids, peptides, and analogues	4.333	4.53	4.41	4.623	4.375	4.417	3.973	4.46	4.433	4.398	4.425	4.46	4.374	4.437	4.376	4.378	4.498	4.606	4.16	4.159	4.274	4.546	4.383
pos_9043	6'-Hydroxybuspirone	6 ' -羟基丁螺环酮	metab_9321	B(ii)	-	-	HMDB0061110	M+H	C21H31N5O3	4.6307	-	-	pos	-	-	-	-	Organoheterocyclic compounds	Diazinanes	402.251	0.121755	0	41.5	3.27412131501535	-	Piperazines	5.307	5.409	5.267	5.503	5.237	5.326	4.895	5.343	5.317	5.297	5.331	5.32	5.311	5.307	5.267	5.298	5.322	5.496	3.962	5.124	5.226	5.323	5.331
pos_9044	Phe Ile	苯丙氨酸 异亮氨酸	metab_9322	B(i)	-	-	-	M+H	C15H22N2O3	4.62	-	-	pos	-	-	-	-	-	-	279.169	0.0276923828041	43.3	0	-3.27508	-	-	4.902	4.92	5.038	4.992	4.893	4.939	4.892	4.699	4.398	5.144	5.167	5.044	4.87	5.181	5.003	4.983	4.788	4.739	5.098	4.944	4.734	4.529	4.959
pos_9045	3-keto Fusidic acid	-	metab_9323	B(ii)	-	-	HMDB0060745	M+NH4	C31H46O7	4.62	-	-	pos	-	-	-	-	Lipids and lipid-like molecules	Steroids and steroid derivatives	548.363	0.209223	0	71.7	9.48177477589336	-	Oxosteroids	5.895	6.001	5.85	6.056	5.85	5.893	5.488	5.894	5.912	5.874	5.879	5.848	5.835	5.876	5.81	5.81	5.86	6.06	3.217	5.653	5.764	5.858	5.821
pos_9051	Furazolidone	呋喃唑酮	metab_9330	B(ii)	-	-	HMDB0247183;HMDB0014752	M+NH4	C8H7N3O5	4.5879	-	C07999	pos	-	-	-	-	Organoheterocyclic compounds	Furans	243.071	0.0470894648959	0	43.7	-8.3504	67-45-8	Nitrofurans	6.268	6.247	6.27	6.193	6.271	6.248	6.235	6.265	6.251	6.237	6.22	6.23	6.216	6.273	6.256	6.242	6.266	6.246	6.389	6.297	6.235	6.257	6.267
pos_9054	N-Myristoyl Arginine	N -肉豆蔻酰精氨酸	metab_9333	B(ii)	-	-	HMDB0242046	M+H	C20H40N4O3	4.5772	-	-	pos	-	-	-	-	Organic acids and derivatives	Carboxylic acids and derivatives	385.317	0.0138643957008	0	79.1	-1.69662	-	Amino acids, peptides, and analogues	7.081	7.067	7.061	7.033	7.054	7.049	7.05	7.028	7.043	7.067	7.027	7.064	7.039	7.054	7.068	7.053	7.024	7.025	7.159	7.065	7.049	7.035	7.067
pos_9058	Neobavaisoflavone	新补骨脂异黄酮	metab_9337	B(ii)	-	-	HMDB0255518;LMPK12050027	M+H-2H2O	C20H18O4	4.5719	-	-	pos	-	-	-	-	Phenylpropanoids and polyketides	Isoflavonoids	287.11	0.16702	0	31	9.454506139138278	-	Isoflav-2-enes	4.746	4.514	4.901	4.656	4.463	4.729	4.614	4.686	4.972	4.735	4.408	4.657	4.769	4.847	4.864	4.659	4.826	4.714	5.251	4.784	5.031	4.631	4.682
pos_9069	Minaxolone	羟胺孕烷	metab_9349	B(ii)	-	-	HMDB0254737	M+ACN+Na	C25H43NO3	4.5347	-	-	pos	-	-	-	-	Lipids and lipid-like molecules	Steroids and steroid derivatives	469.338	0.0496969310085	0	48.3	-6.16367	-	Pregnane steroids	4.812	4.791	4.829	4.725	4.79	4.853	4.791	4.788	4.821	4.826	4.81	4.856	4.828	4.837	4.856	4.838	4.767	4.768	4.997	4.827	4.836	4.823	4.828
pos_9076	Diethadione	二乙恶嗪二酮	metab_9356	B(ii)	-	-	HMDB0251235	M+2Na-H	C8H13NO3	4.5294	-	-	pos	-	-	-	-	Organoheterocyclic compounds	Oxazinanes	216.06	0.0344610155251	0	35.7	-6.10262	-	1,3-oxazinanes	5.495	5.491	5.511	5.472	5.502	5.499	5.511	5.487	5.504	5.511	5.482	5.484	5.481	5.503	5.52	5.486	5.465	5.472	5.628	5.515	5.473	5.476	5.506
pos_9079	Hydroxysteroid	羟类固醇	metab_9359	B(ii)	-	-	HMDB0253293	M+ACN+Na	C19H32O2	4.5241	-	C02159	pos	-	-	-	-	Lipids and lipid-like molecules	Steroids and steroid derivatives	356.254	0.0281993202253	0	37.6	-7.4252	-	Androstane steroids	4.324	4.313	4.389	4.26	4.368	4.334	4.328	4.308	4.376	4.414	4.322	4.356	4.367	4.377	4.364	4.361	4.318	4.336	4.46	4.43	4.378	4.322	4.381
pos_9085	CDP-DG(22:6(4Z,7Z,10Z,12E,16Z,19Z)-OH(14)/i-19:0)	-	metab_9366	B(ii)	-	-	HMDB0294067	M+H+Na	C53H87N3O16P2	4.5134	-	-	pos	-	-	-	-	Not Available	Not Available	553.776	0.0830598078842	0	40.1	0.30355947857393395	-	Not Available	6.184	6.202	6.148	6.16	6.164	6.194	6.11	6.195	5.862	6.209	6.3	6.03	6.171	6.225	6.302	6.33	6.351	5.941	6.315	6.388	6.166	6.037	6.156
pos_9091	(S)-[8]-Gingerol	（S） -[8]-姜酚	metab_9373	B(ii)	-	-	HMDB0033615	M+ACN+H	C19H30O4	4.476	-	C17495	pos	-	-	-	-	Benzenoids	Phenols	364.247	0.0238076453657	0	40.8	-3.66058	23513-08-8	Methoxyphenols	4.621	4.691	4.662	4.673	4.704	4.613	4.675	4.657	4.639	4.584	4.627	4.586	4.618	4.616	4.592	4.55	4.605	4.612	4.746	4.597	4.629	4.559	4.559
pos_91	2-Furamide	2-糠酰胺	metab_9382	B(ii)	-	-	HMDB0015684;HMDB0245133	M+NH4, M+CH3OH+H, M+ACN+H	C5H5NO2	2.0652	-	C07637	pos	-	-	-	-	Benzenoids	Phenol esters	153.066	0.0365046658756	0	40	-2.21102	3736-81-0	Not Available	5.349	5.4	5.357	5.472	5.419	5.402	5.55	5.347	4.638	5.311	4.451	4.474	5.228	5.379	5.47	4.69	5.217	5.319	5.353	5.353	5.361	5.193	4.394
pos_910	3a,6b,7b-Trihydroxy-5b-cholanoic acid	3a，6b，7b-三羟基-5b-胆酸	metab_9383	B(ii)	-	-	HMDB0000415	M+H-H2O, M+Na	C24H40O5	6.1857	-	C17726	pos	-	-	-	-	Lipids and lipid-like molecules	Steroids and steroid derivatives	391.284	0.126052	0	62.8	-1.263	2393-59-1	Bile acids, alcohols and derivatives	4.188	4.601	4.281	4.538	4.676	4.351	4.571	4.647	4.755	5.019	4.77	4.837	4.748	5.227	1.843	4.43	4.982	2.112	5.964	4.502	5.147	4.35	5.262
pos_9113	6-isobutyl-4-hydroxy-2-pyrone	6 -异丁基- 4 -羟基- 2 -吡喃酮	metab_9398	B(ii)	-	-	HMDB0304229	M+H	C9H11O3-	4.4014	-	-	pos	-	-	-	-	Organoheterocyclic compounds	Pyrans	168.077	0.0575508093188	0	53.4	-9.48286	-	Pyranones and derivatives	4.045	4.005	4.067	4.034	4.07	4.043	4.023	4.015	4.018	4.053	4.013	4.042	4.022	4.007	4.101	4.018	3.993	3.993	4.11	4.054	4.018	3.997	4.036
pos_9125	Bufexamac	丁苯羟酸	metab_9411	B(i)	-	-	-	M+NH4	C12H17NO3	4.3854	-	-	pos	-	-	-	-	-	-	241.154	0.0917433639858	33.1	0	-1.26843	-	-	4.342	4.336	4.357	4.316	4.335	4.327	4.295	4.333	4.356	4.37	4.309	4.355	4.299	4.331	4.302	4.295	4.26	4.254	4.42	4.308	4.3	4.243	4.311
pos_9137	PE(20:4(5Z,8Z,11Z,14Z)-OH(20)/DiMe(9,3))	-	metab_9424	B(ii)	-	-	HMDB0284967	M+H+Na	C43H72NO10P	4.348	-	-	pos	-	-	-	-	Not Available	Not Available	408.744	0.0313377665441	0	40	3.47600507333089	-	Not Available	4.547	4.541	4.548	4.782	4.703	4.688	4.733	4.522	4.839	4.352	4.562	4.518	4.735	4.557	4.893	4.371	4.766	4.274	4.413	4.623	4.719	4.838	5.054
pos_9138	Etimicin	爱大霉素	metab_9425	B(ii)	-	-	HMDB0252101	M+H-H2O	C21H43N5O7	4.3427	-	-	pos	-	-	-	-	Organic oxygen compounds	Organooxygen compounds	460.311	0.188367	0	73.7	-4.3295	-	Carbohydrates and carbohydrate conjugates	5.997	6.078	5.96	6.143	5.925	6.004	5.657	6.008	6.006	5.977	5.953	5.949	5.939	5.975	5.922	5.901	5.948	6.13	4.286	5.772	5.881	5.947	5.956
pos_9140	Uracil analogue	-	metab_9428	B(ii)	-	-	HMDB0259710	M+H-2H2O	C12H16N2O4	4.3427	-	-	pos	-	-	-	-	Nucleosides, nucleotides, and analogues	Nucleoside and nucleotide analogues	217.097	0.144054	0	42.1	-0.763592	-	Cyclopentyl nucleosides	4.271	4.134	3.962	3.394	4.078	4.073	3.899	3.917	4.12	4.078	4.05	3.996	3.83	4.542	4.231	4.148	4.268	3.28	4.297	4.173	3.884	3.555	3.749
pos_9147	Cyclo(D-trp-D-asp-pro-D-val-leu)	环（D-trp-D-asp-pro-D-val-leu）	metab_9435	B(ii)	-	-	HMDB0249361	M+ACN+Na	C31H42N6O7	4.3158	-	-	pos	-	-	-	-	Organic acids and derivatives	Carboxylic acids and derivatives	674.333	0.0912221687768	0	81.3	8.78182071913447	-	Amino acids, peptides, and analogues	5.381	5.385	5.574	5.477	5.279	5.431	5.409	5.318	5.295	5.444	5.652	5.666	5.301	5.736	5.43	5.416	5.448	4.659	5.65	5.339	5.021	4.959	5.654
pos_9155	L-Dopa	左旋多巴	metab_9444	B(ii)	map01100;map05012;map00350;map04728;map05034;map05030;map05031;map04917	Metabolic pathways;Parkinson disease;Tyrosine metabolism;Dopaminergic synapse;Alcoholism;Cocaine addiction;Amphetamine addiction;Prolactin signaling pathway	HMDB0000181;PW_C000117	M+H-H2O	C9H11NO4	4.3105	代谢途径;帕金森病;酪氨酸代谢;多巴胺能突触;酒精中毒;可卡因成瘾;苯丙胺成瘾;催乳素信号通路	C00355	pos	Peptides;Hormones and transmitters	Amino acids;Neurotransmitters	Metabolism;Human Diseases;Metabolism;Organismal Systems;Human Diseases;Human Diseases;Human Diseases;Organismal Systems	Global and overview maps;Neurodegenerative disease;Amino acid metabolism;Nervous system;Substance dependence;Substance dependence;Substance dependence;Endocrine system	Organic acids and derivatives	Carboxylic acids and derivatives	180.065	0.0993229868838	0	40	-1.22546	59-92-7	Amino acids, peptides, and analogues	5.59	5.499	5.211	5.246	5.632	5.48	5.44	5.356	5.58	5.545	5.503	5.408	5.293	5.573	5.718	5.53	5.539	5.386	5.546	5.564	5.369	5.256	5.253
pos_9172	Rimiterol	利米特罗	metab_9463	B(ii)	-	-	HMDB0257235	M+NH4	C12H17NO3	4.2838	-	-	pos	-	-	-	-	Benzenoids	Phenols	241.154	0.0603979079489	0	63.1	-1.53071	-	Benzenediols	4.125	4.143	4.069	4.084	4.083	4.152	4.111	4.099	4.141	4.111	4.114	4.082	4.095	4.087	4.055	4.03	4.01	4.046	4.177	4.078	4.105	4.023	4.062
pos_9183	Salsolinol	去甲猪毛菜碱	metab_9475	B(ii)	-	-	HMDB0005199;HMDB0042012	2M+NH4	C10H13NO2	4.2573	-	C09642	pos	-	-	-	-	Organoheterocyclic compounds	Tetrahydroisoquinolines	376.22	0.0795020973282	0	39	-8.09292	27740-96-1;525-72-4	Not Available	4.392	4.406	4.417	4.394	4.387	4.4	4.402	4.333	4.343	4.34	4.463	4.368	4.381	4.418	4.346	4.324	4.414	4.358	4.545	4.362	4.364	4.306	4.404
pos_9184	4-Androstenediol	4 -雄烯二醇	metab_9476	B(ii)	-	-	LMST02020105;HMDB0005849	M+ACN+Na	C19H30O2	4.2573	-	C14210	pos	Steroids	19-Carbon atoms	-	-	Lipids and lipid-like molecules	Steroids and steroid derivatives	354.238	0.0423976795395	0	61.6	-7.52968	1156-92-9	Androstane steroids	5.485	5.492	5.497	5.46	5.504	5.484	5.494	5.472	5.484	5.497	5.481	5.475	5.461	5.443	5.453	5.467	5.437	5.438	5.573	5.473	5.453	5.437	5.473
pos_9191	N-(3-Aminopropyl)-N-methylcarbamic acid tert-butyl ester	N-（3-氨丙基）-N-甲基氨基甲酸叔丁酯	metab_9484	B(ii)	-	-	HMDB0244680	2M+Na	C9H20N2O2	4.2467	-	-	pos	-	-	-	-	Organic acids and derivatives	Carboxylic acids and derivatives	399.296	0.0402128797446	0	30.4	4.8714017342499405	-	Amino acids, peptides, and analogues	4.873	4.879	4.856	4.887	4.816	4.855	4.883	4.848	4.856	4.85	4.79	4.809	4.857	4.793	4.829	4.831	4.785	4.823	4.972	4.844	4.849	4.822	4.87
pos_9211	Aspartame	天冬甜精	metab_9506	B(ii)	map04742	Taste transduction	HMDB0001894;MJDBOTE0001640	M+H	C14H18N2O5	4.1989	味觉转导	C11045	pos	-	-	Organismal Systems	Sensory system	Organic acids and derivatives	Carboxylic acids and derivatives	295.128	0.0331872855439	0	39.3	-1.4734	22839-47-0	Amino acids, peptides, and analogues	5.594	5.356	5.478	5.441	5.587	5.506	5.52	5.496	5.439	5.556	5.636	5.586	5.569	5.631	5.577	5.538	5.5	5.472	5.713	5.413	5.637	5.408	5.444
pos_9216	Cabergoline	卡麦角林	metab_9511	B(ii)	-	-	HMDB0014393	M+H-2H2O	C26H37N5O2	4.1776	-	C08187	pos	-	-	-	-	Alkaloids and derivatives	Ergoline and derivatives	416.285	0.203121	0	63	8.60540020775892	81409-90-7	Lysergic acids and derivatives	5.944	6.046	5.912	6.098	5.902	5.964	5.616	5.986	5.95	5.946	5.922	5.914	5.882	5.935	5.872	5.866	5.911	6.087	4.079	5.72	5.845	5.904	5.92
pos_9225	Leu-Pro-Ile	亮氨酸-脯氨酸-异亮氨酸	metab_9521	B(ii)	-	-	HMDB0304805	M+H-H2O	C17H31N3O4	4.1508	-	-	pos	-	-	-	-	Organic acids and derivatives	Carboxylic acids and derivatives	324.227	0.0257560825733	0	45.5	-2.51066	-	Amino acids, peptides, and analogues	4.619	4.593	4.628	4.625	4.667	4.665	4.631	4.624	4.642	4.629	4.655	4.686	4.592	4.655	4.649	4.673	4.622	4.62	4.765	4.685	4.675	4.62	4.684
pos_9229	PI(5-iso PGF2VI/20:2(11Z,14Z))	-	metab_9525	B(ii)	-	-	HMDB0277216	M+2Na	C47H81O16P	4.1402	-	-	pos	-	-	-	-	Not Available	Not Available	489.255	0.0229219	0	74	6.53551187083818	-	Not Available	5.961	5.964	6.012	5.909	5.935	5.968	6.045	5.821	5.756	5.948	6.214	5.906	5.859	5.99	5.968	6.097	6.095	5.715	5.997	6.235	5.791	5.843	5.868
pos_9231	Fusaric Acid	镰孢酸	metab_9528	B(i)	-	-	HMDB0252556	M+NH4	C10H13NO2	4.1402	-	C10146	pos	-	-	-	-	Organoheterocyclic compounds	Pyridines and derivatives	197.128	0.0278305606226	32.9	0	-1.42742	536-69-6	Pyridinecarboxylic acids and derivatives	4.427	4.386	4.395	4.262	4.429	4.413	4.326	4.442	4.329	4.519	4.453	4.393	4.282	4.635	4.349	4.399	4.394	4.29	4.662	4.368	4.441	4.253	4.404
pos_9235	Kynurenic Acid	犬尿喹啉酸	metab_9532	B(i)	map01100;map00380	Metabolic pathways;Tryptophan metabolism	PW_C000566;HMDB0000715;MJDBOTE0000367	M+H	C10H7NO3	4.1349	代谢途径;色氨酸代谢	C01717	pos	-	-	Metabolism;Metabolism	Global and overview maps;Amino acid metabolism	Organoheterocyclic compounds	Quinolines and derivatives	190.05	0.0445529761268	97.8	0	-1.26615	492-27-3	Quinoline carboxylic acids	4.366	4.074	4.346	4.129	4.373	4.263	4.277	4.167	4.369	4.259	4.31	4.394	4.761	4.626	4.258	4.306	4.17	4.425	4.376	4.222	4.611	4.386	4.089
pos_9241	Androst-5-ene-3beta,17beta-diol	雄(甾)-5-Ene-3Beta，17Beta - Diol	metab_9539	B(ii)	map00140;map04913	Steroid hormone biosynthesis;Ovarian steroidogenesis	HMDB0244754;HMDB0003818	M+ACN+Na	C19H30O2	4.1083	类固醇激素生物合成;卵巢类固醇生成	C04295	pos	Steroids	19-Carbon atoms	Metabolism;Organismal Systems	Lipid metabolism;Endocrine system	Lipids and lipid-like molecules	Steroids and steroid derivatives	354.238	0.0192296769765	0	61.9	-7.47476	521-17-5	Androstane steroids	5.181	5.181	5.186	5.156	5.185	5.234	5.194	5.16	5.178	5.201	5.182	5.187	5.189	5.184	5.185	5.184	5.152	5.161	5.309	5.192	5.177	5.152	5.2
pos_9242	28-Glucosyl-3b-hydroxy-12-oleanene-30-methoxy-28-oic acid 3-[arabinosyl-(1->3)-glucuronide]	28-葡萄糖基-3b-羟基-12-齐墩果烯-30-甲氧基-28-油酸3-[阿拉伯糖基-（1->3）-葡萄糖醛酸]	metab_9540	B(ii)	-	-	HMDB0038983	M+H+Na	C48H74O20	4.103	-	-	pos	-	-	-	-	Lipids and lipid-like molecules	Prenol lipids	497.24	0.0312630354722	0	67	5.603930977561848	359775-97-6	Terpene glycosides	6.354	6.499	6.536	6.424	6.194	6.435	6.618	6.389	6.293	6.293	6.535	6.522	6.394	6.453	6.421	6.53	6.588	5.947	6.433	6.537	6.238	6.463	6.264
pos_9244	PS(18:4(6Z,9Z,12Z,15Z)/5-iso PGF2VI)	-	metab_9542	B(ii)	-	-	HMDB0281985	M+H+Na	C42H68NO13P	4.0923	-	-	pos	-	-	-	-	Not Available	Not Available	424.721	0.0919467331762	0	39.8	3.10483448050987	-	Not Available	4.282	4.268	4.381	4.427	4.662	4.492	4.483	4.815	4.487	4.218	4.272	4.294	4.737	4.247	3.991	4.832	4.713	4.878	3.199	4.9	4.782	4.736	4.293
pos_9285	2-Quinolinecarboxylic acid	喹啉-2-甲酸	metab_9587	B(i)	-	-	HMDB0000842	M+H	C10H7NO2	3.9696	-	C06325	pos	-	-	-	-	Organoheterocyclic compounds	Quinolines and derivatives	174.055	0.0592956663525	83.8	0	-1.48608	1993-10-07	Quinoline carboxylic acids	4.699	4.597	4.887	4.624	4.761	4.74	5.004	4.85	5.26	4.69	4.945	5.339	5.192	5.255	5.272	5.163	4.893	4.879	5.059	5.149	4.883	5.268	4.678
pos_9294	Carisoprodol	肌安宁	metab_9597	B(ii)	-	-	HMDB0014539	M+H-2H2O	C12H24N2O4	3.9537	-	C07927	pos	-	-	-	-	Organic acids and derivatives	Carboxylic acids and derivatives	225.159	0.2089	0	50	-1.34012	78-44-4	Amino acids, peptides, and analogues	4.172	4.283	4.034	4.041	4.156	4.185	4.567	4.047	4.044	4.218	3.993	4.29	4.028	4.1	4.383	4.249	4.192	4.051	4.262	4.708	4.26	4.221	4.164
pos_9297	N6-Acetyl-L-lysine	N6 -乙酰- L -赖氨酸	metab_9600	B(ii)	map01100;map00310	Metabolic pathways;Lysine degradation	HMDB0000206	M+H-H2O	C8H16N2O3	3.9484	代谢途径;赖氨酸降解	C02727	pos	-	-	Metabolism;Metabolism	Global and overview maps;Amino acid metabolism	Organic acids and derivatives	Carboxylic acids and derivatives	171.113	0.0770771502083	0	53.1	-0.0472104	692-04-6	Amino acids, peptides, and analogues	3.055	4.18	3.075	3.071	3.514	3.394	4.73	2.969	3.112	4.075	3.102	4.187	3.182	3.296	4.402	3.862	3.645	3.122	3.34	4.647	3.713	3.839	3.545
pos_9309	N6-Threonylcarbamoyladenosine	6-苏氨酰氨基甲酰腺苷酸	metab_9614	B(i)	-	-	-	M+H	C15H20N6O8	3.9058	-	-	pos	-	-	-	-	-	-	413.141	0.113262	72.8	0	-1.27096	-	-	4.314	4.118	4.171	4.198	4.251	4.228	4.146	4.195	4.312	4.256	4.262	4.165	4.156	4.255	4.122	4.225	4.112	4.199	4.447	4.101	4.289	4.205	4.027
pos_9315	2-Amino-3-methyl-1-butanol	2 -氨基- 3 -甲基- 1 -丁醇	metab_9621	B(ii)	-	-	HMDB0244984	2M+Na	C5H13NO	3.8952	-	-	pos	-	-	-	-	Organic nitrogen compounds	Organonitrogen compounds	229.191	0.167416	0	59	9.44718068384007	-	Amines	2.064	3.714	2.059	2.066	2.585	2.885	3.507	2.027	2.043	3.426	2.626	3.378	2.336	2.072	3.742	3.343	3.554	2.052	2.656	3.101	3.374	3.471	2.782
pos_9318	Gamma-Glutamylleucine	-	metab_9624	B(ii)	-	-	HMDB0011171	M+H	C11H20N2O5	3.8845	-	-	pos	-	-	-	-	Organic acids and derivatives	Carboxylic acids and derivatives	261.144	0.0305484	0	67.3	-1.49521	2566-39-4	Amino acids, peptides, and analogues	5.757	5.479	5.587	5.532	5.771	5.653	5.671	5.602	5.425	5.728	5.757	5.759	5.691	5.753	5.663	5.642	5.531	5.566	5.904	5.581	5.744	5.502	5.705
pos_9326	(2E)-Decenoyl-ACP	（2E）-癸烯酰基ACP	metab_9633	B(ii)	-	-	HMDB0062225	M+ACN+H	C6H11NO2	3.842	-	C03969	pos	-	-	-	-	Organic acids and derivatives	Carboxylic acids and derivatives	171.113	0.152235	0	32.9	-0.635712	52-52-8	Amino acids, peptides, and analogues	3.413	4.323	3.474	3.453	3.708	3.644	4.791	3.509	3.487	4.243	3.498	4.325	3.5	3.61	4.52	4.014	3.89	3.508	3.638	4.763	3.873	4.006	3.772
pos_9327	1-Aminocyclohexanecarboxylic acid	1 -氨基环己烷羧酸	metab_9634	B(i)	-	-	HMDB0243822;HMDB0038249	M+H	C7H13NO2	3.842	-	-	pos	-	-	-	-	Organic acids and derivatives	Carboxylic acids and derivatives	144.102	0.0875193504189	50.7	0	-1.36635	2756-56-1	Amino acids, peptides, and analogues	3.198	4.725	2.57	2.644	4.091	3.941	5.227	3.06	2.098	4.678	2.891	4.753	3.28	3.645	4.938	4.384	4.22	2.735	3.618	5.194	4.191	4.356	4.093
pos_9329	MG(0:0/10:0/0:0)	-	metab_9636	B(ii)	-	-	HMDB0072874	M+H-H2O	C13H26O4	3.8312	-	-	pos	-	-	-	-	Lipids and lipid-like molecules	Glycerolipids	229.182	0.0504972095086	0	41.4	7.0036999571460905	-	Monoradylglycerols	4.95	4.949	4.953	4.908	4.942	4.957	4.94	4.905	4.942	4.968	4.93	4.941	4.927	4.948	4.968	4.929	4.932	4.898	5.051	4.965	4.932	4.932	4.949
pos_9330	CDP-DG(a-17:0/LTE4)	-	metab_9638	B(ii)	-	-	HMDB0292981	M+2H	C52H88N4O18P2S	3.8259	-	-	pos	-	-	-	-	Not Available	Not Available	576.274	0.0556532701169	0	68.4	4.09269581644878	-	Not Available	4.445	4.543	4.674	4.737	4.942	4.766	5.219	5.181	5.265	4.243	4.579	4.602	5.222	4.436	4.767	5.109	4.951	5.454	4.56	4.831	5.491	5.42	4.378
pos_9336	CDP-DG(PGJ2/18:1(9Z))	-	metab_9644	B(ii)	-	-	HMDB0291212	M+H+Na	C50H81N3O17P2	3.7992	-	-	pos	-	-	-	-	Not Available	Not Available	540.756	0.109222	0	57.4	9.850353967406539	-	Not Available	5.988	5.936	5.939	5.998	6.174	6.023	6.078	6.15	5.98	5.825	6.035	6.039	6.086	5.956	6.042	6.247	6.171	5.987	6.004	6.088	6.206	6.09	5.978
pos_9340	(-)-jasmonoyl-L-isoleucine	（-）-茉莉酰基-L-异亮氨酸	metab_9649	B(ii)	-	-	HMDB0303944;HMDB0029391	M+NH4	C18H28NO4-	3.7939	-	C18699	pos	-	-	-	-	Organic acids and derivatives	Carboxylic acids and derivatives	340.234	0.0763934599384	0	31.2	-5.62379	120330-93-0	Amino acids, peptides, and analogues	5.091	5.065	5.116	5.055	5.09	5.142	5.058	5.086	5.121	5.087	5.118	5.046	5.102	5.087	5.118	5.073	5.118	5.081	5.226	5.119	5.04	5.074	5.039
pos_9342	Somatotropin (6-13)	生长激素（6-13）	metab_9651	B(ii)	-	-	HMDB0258377	M+2Na	C41H66N12O13	3.7785	-	-	pos	-	-	-	-	Organic acids and derivatives	Carboxylic acids and derivatives	490.232	0.0779323226789	0	63.4	-2.30248	-	Amino acids, peptides, and analogues	5.897	5.837	5.858	5.898	5.934	5.954	5.735	5.895	5.531	6.007	6.11	6.069	5.866	6.104	5.871	6.017	5.982	5.452	6.265	5.954	5.792	5.706	6.081
pos_9350	2-Phenylacetamide	2 -苯基乙酰胺	metab_9660	B(i)	map01100;map00360	Metabolic pathways;Phenylalanine metabolism	HMDB0010715	M+H-H2O	C8H9NO	3.7584	代谢途径;苯丙氨酸代谢	C02505	pos	-	-	Metabolism;Metabolism	Global and overview maps;Amino acid metabolism	Benzenoids	Benzene and substituted derivatives	118.065	0.0824271994852	40.3	0	-1.18713	103-81-1	Phenylacetamides	6.202	6.189	6.234	6.173	6.214	6.21	6.245	6.205	6.247	6.213	6.227	6.204	6.221	6.233	6.258	6.251	6.214	6.218	6.359	6.252	6.214	6.23	6.259
pos_9355	(4-Chloro-2-methylphenoxy)acetic acid	（4-氯-2-甲基苯氧基）乙酸	metab_9665	B(ii)	-	-	HMDB0254366	M+H-H2O	C9H9ClO3	3.7525	-	C18528	pos	-	-	-	-	Benzenoids	Benzene and substituted derivatives	183.02	0.112454	0	41.3	-1.46237	-	Phenoxyacetic acid derivatives	5.609	5.623	5.644	5.591	5.619	5.646	5.677	5.653	5.682	5.634	5.684	5.623	5.669	5.626	5.685	5.687	5.653	5.663	5.779	5.7	5.65	5.674	5.688
pos_9364	1,5-Naphthalenediamine	1，5 -萘二胺	metab_9675	B(i)	-	-	HMDB0244231	M+H	C10H10N2	3.6955	-	C19463	pos	-	-	-	-	Benzenoids	Naphthalenes	159.091	0.142646	58.1	0	-1.69213	2243-62-1	Not Available	5.559	5.383	5.58	5.463	5.628	5.592	5.561	5.582	5.563	5.565	5.699	5.595	5.706	5.687	5.667	5.656	5.669	5.715	5.73	5.588	5.616	5.593	5.639
pos_9366	2-Methylindole	2-甲基吲哚	metab_9677	B(i)	-	-	HMDB0245234	M+H	C9H9N	3.6955	-	-	pos	-	-	-	-	Organoheterocyclic compounds	Indoles and derivatives	132.081	0.137866	49.6	0	-1.30244	-	Indoles	4.959	4.795	4.97	4.866	5.012	4.978	4.959	4.974	4.962	4.988	5.105	5.018	5.095	5.09	5.055	5.022	5.03	5.109	5.131	4.963	4.969	4.913	5.016
pos_9371	Quillaic acid 3-[xylosyl-(1->3)-[galactosyl-(1->2)]-glucuronide]	奎莱酸3-[木糖基-（1->3）-[半乳糖基-（1->2）]-葡萄糖醛酸]	metab_9683	B(ii)	-	-	HMDB0033406	M+H+Na	C47H72O20	3.6645	-	-	pos	-	-	-	-	Lipids and lipid-like molecules	Prenol lipids	490.232	0.107085	0	59.7	5.46820299922305	97892-86-9	Terpene glycosides	5.765	5.791	5.821	5.902	6.039	5.847	5.719	5.883	5.466	5.937	6.033	5.957	5.756	6.055	5.827	5.942	5.95	5.383	6.201	5.928	5.782	5.713	6.018
pos_9373	5'-Methylthioadenosine	5’-甲硫腺苷	metab_9685	B(i)	map01100;map00270	Metabolic pathways;Cysteine and methionine metabolism	PW_C000910;HMDB0001173	M+H	C11H15N5O3S	3.6576	代谢途径;半胱氨酸和蛋氨酸代谢	C00170	pos	-	-	Metabolism;Metabolism	Global and overview maps;Amino acid metabolism	Nucleosides, nucleotides, and analogues	5''-deoxyribonucleosides	298.096	0.20134	91.4	0	-1.7973	2457-80-9	5''-deoxy-5''-thionucleosides	4.94	4.934	5.072	5.043	5.088	5.062	5.3	5.031	5.309	4.889	5.095	4.983	5.277	4.933	5.132	5.192	5.055	5.255	5.275	5.244	5.302	5.409	4.856
pos_938	3-Oxocholic acid	3-氧代-7a,12a-二羟基-5b-胆烷酸	metab_9692	B(ii)	-	-	LMST04010443;HMDB0000502	M+H-2H2O, M+NH4	C24H38O5	6.2226	-	-	pos	-	-	-	-	Lipids and lipid-like molecules	Steroids and steroid derivatives	424.305	0.0533005079473	0	71	-0.895951	2304-89-4	Bile acids, alcohols and derivatives	5.139	4.243	4.57	4.808	5.205	4.743	5.007	5.5	5.41	4.702	4.986	4.958	5.564	5.537	5.002	5.512	5.339	4.214	5.978	5.264	5.132	4.703	5.485
pos_9386	Leu Ile Trp	亮氨酸 异亮氨酸 色氨酸	metab_9699	B(i)	-	-	-	M+H	C23H34N4O4	3.5937	-	-	pos	-	-	-	-	-	-	431.265	0.162084	38.8	0	-1.80699	-	-	5.025	4.651	5.111	4.907	5.179	4.968	5.034	5.084	5.018	5.099	5.248	5.078	5.229	5.199	5.131	5.056	5.163	5.308	5.293	5.105	5.043	4.998	5.081
pos_9391	Pentaethylene glycol	五甘醇	metab_9705	B(i)	-	-	HMDB0256256	M+H	C10H22O6	3.5884	-	-	pos	-	-	-	-	Organic oxygen compounds	Organooxygen compounds	239.149	0.0779380231677	82.6	0	-1.39874	-	Ethers	5.788	5.921	5.811	5.946	5.819	5.867	5.685	5.881	5.825	5.927	5.906	5.905	5.869	5.923	5.88	5.848	5.873	6.001	4.993	5.71	5.834	5.903	5.928
pos_9393	CDP-DG(18:3(6Z,9Z,12Z)/22:6(5Z,8E,10Z,13Z,15E,19Z)-2OH(7S, 17S))	-	metab_9707	B(ii)	-	-	HMDB0291559	M+2H	C52H79N3O17P2	3.5777	-	-	pos	-	-	-	-	Not Available	Not Available	540.756	0.13064	0	41.1	7.41233214262603	-	Not Available	3.963	4.19	4.559	4.649	4.974	4.481	4.556	4.74	4.445	4.326	4.615	4.408	4.402	4.162	4.48	4.903	4.74	4.519	4.297	4.735	4.916	4.243	4.398
pos_9395	Quinelorane	喹洛雷	metab_9709	B(ii)	-	-	HMDB0257038	M+H-H2O	C14H22N4	3.5724	-	-	pos	-	-	-	-	Organoheterocyclic compounds	Diazanaphthalenes	229.181	0.15909	0	33.8	0.330610967963188	-	Benzodiazines	4.482	4.554	4.556	4.541	4.523	4.555	4.575	4.555	4.53	4.533	4.53	4.589	4.437	4.478	4.58	4.566	4.462	4.595	4.762	4.549	4.54	4.607	4.577
pos_9399	Arginylphenylalaninamide	精氨酰苯丙氨酰胺	metab_9713	B(ii)	-	-	HMDB0257190	M+ACN+H	C15H24N6O2	3.5404	-	-	pos	-	-	-	-	Organic acids and derivatives	Carboxylic acids and derivatives	362.228	0.245093	0	34	-6.80436	-	Amino acids, peptides, and analogues	4.287	4.294	4.427	4.301	4.347	4.344	4.26	4.368	4.366	4.344	4.491	4.458	4.406	4.476	4.487	4.485	4.511	4.608	4.683	4.553	4.474	4.437	4.464
pos_94	Dihydrocoumarin	二氢香豆素	metab_9714	B(i)	-	-	HMDB0036626;MJDBOTE0000711	M+H, M+NH4, M+H-H2O	C9H8O2	2.8038	-	C02274	pos	-	-	-	-	Phenylpropanoids and polyketides	3,4-dihydrocoumarins	166.086	0.0251821157246	33.3	0	-1.87799	119-84-6	Not Available	6.929	6.886	6.941	6.939	6.998	6.941	7.013	6.977	6.879	7.026	7.078	7.018	7.04	7.085	6.997	6.92	6.9	6.933	7.177	6.923	7.065	6.913	7.003
pos_9405	Neotussilagine	-	metab_9721	B(ii)	-	-	HMDB0031820	M+ACN+H	C10H17NO3	3.5245	-	-	pos	-	-	-	-	Organoheterocyclic compounds	Pyrrolizidines	241.154	0.0674612267904	0	30.7	-1.81729	147730-89-0	Not Available	5.409	5.405	5.388	5.379	5.382	5.417	5.404	5.377	5.387	5.43	5.368	5.399	5.376	5.394	5.381	5.392	5.318	5.349	5.43	5.375	5.356	5.372	5.407
pos_9410	Collagen	胶原	metab_9727	B(ii)	-	-	HMDB0303213	M+H+Na	C36H60N10O11	3.5032	-	C00211	pos	-	-	-	-	Organic acids and derivatives	Carboxylic acids and derivatives	416.223	0.0268820279893	0	55	5.82721836755522	9064-67-9	Amino acids, peptides, and analogues	4.5	4.788	4.801	4.95	4.898	4.713	4.723	4.772	4.481	4.788	5.162	4.728	4.765	4.875	4.786	4.713	4.824	3.845	4.858	4.89	4.414	4.249	4.662
pos_9418	Norleucine	正亮氨酸	metab_9735	B(i)	-	-	HMDB0251526;HMDB0001645	M+ACN+H	C6H13NO2	3.4608	-	C01933	pos	-	-	-	-	Organic acids and derivatives	Carboxylic acids and derivatives	173.128	0.17619	43.4	0	-2.17572	327-57-1	Amino acids, peptides, and analogues	4.705	4.75	4.858	4.552	4.795	4.641	4.99	4.856	4.535	4.9	4.884	4.881	5.044	5.064	4.826	4.984	4.853	4.959	5.462	4.967	4.991	4.988	5.035
pos_9421	Asp Leu	天冬氨酸 亮氨酸	metab_9739	B(i)	-	-	-	M+H	C10H18N2O5	3.4555	-	-	pos	-	-	-	-	-	-	247.128	0.0254003768843	81.1	0	-1.4942	-	-	4.799	4.822	4.88	4.805	4.405	4.781	4.786	4.579	4.505	4.851	5.031	4.748	4.514	4.915	4.921	4.763	4.934	4.041	5.12	5.04	4.316	4.692	4.858
pos_9425	Tyr-Gly	酪氨酸-甘氨酸	metab_9743	B(ii)	-	-	HMDB0259337	M+H-H2O	C11H14N2O4	3.4395	-	-	pos	-	-	-	-	Organic acids and derivatives	Carboxylic acids and derivatives	221.092	0.0575322923434	0	38.6	-1.17911	-	Amino acids, peptides, and analogues	3.537	4.303	3.138	3.257	3.935	3.862	4.756	3.324	3.113	4.224	3.498	4.34	3.543	3.66	4.603	4.134	3.985	3.248	3.574	4.691	3.908	4.085	3.803
pos_9426	Vanillin	香草醛	metab_9744	B(ii)	map01100	Metabolic pathways	HMDB0245834;HMDB0012308;MJDBOTE0000374	M+ACN+H	C8H8O3	3.4342	代谢途径	C00755	pos	-	-	Metabolism	Global and overview maps	Benzenoids	Phenols	194.081	0.206369	0	53.9	-2.50823	121-33-5	Methoxyphenols	1.879	4.144	1.873	1.881	3.617	3.264	4.667	1.841	2.129	4.082	2.134	4.188	2.748	3.039	4.481	3.945	3.79	2.184	2.762	4.588	3.737	3.905	3.549
pos_9431	Folinic acid	亚叶酸	metab_9750	B(ii)	map01100;map00670	Metabolic pathways;One carbon pool by folate	HMDB0001562;HMDB0247218	M+H	C20H23N7O7	3.4128	代谢途径;叶酸的一个碳库	C03479	pos	-	-	Metabolism;Metabolism	Global and overview maps;Metabolism of cofactors and vitamins	Organoheterocyclic compounds	Pteridines and derivatives	474.172	0.2361	0	55.2	-1.92311	58-05-9;68538-85-2	Pterins and derivatives	2.898	4.377	2.644	3.067	3.908	3.845	4.516	2.612	2.628	4.207	2.936	4.171	3.465	2.657	4.636	4.257	4.307	2.638	3.612	4.68	3.923	4.119	3.804
pos_9432	(5E)-3-Hydroxyhept-5-enoylcarnitine	（5E）-3-羟基庚-5-烯酰基肉碱	metab_9751	B(ii)	-	-	HMDB0241686	M+H-2H2O	C14H25NO5	3.4128	-	-	pos	-	-	-	-	Lipids and lipid-like molecules	Fatty Acyls	252.159	0.209953	0	38	-1.41217	-	Fatty acid esters	4.872	4.856	4.882	4.882	4.902	4.935	4.92	4.89	4.924	4.959	4.964	4.94	4.941	5	5.013	5	5.002	5	5.136	5.039	5.046	5.017	5.024
pos_9442	Asn Asp Leu	天冬酰胺 天冬氨酸 亮氨酸	metab_9762	B(i)	-	-	-	M+H	C14H24N4O7	3.3861	-	-	pos	-	-	-	-	-	-	361.171	0.0527852518031	34.6	0	-1.32393	-	-	4.514	4.582	4.772	4.587	4.34	4.599	4.463	4.354	4.243	4.52	4.788	4.758	4.191	4.869	4.503	4.435	4.645	3.711	4.914	4.454	4.3	4.129	4.834
pos_9458	Metoprolol Acid	美多心安酸	metab_9779	B(i)	-	-	HMDB0254682	M+H-H2O	C14H21NO4	3.3435	-	-	pos	-	-	-	-	Benzenoids	Phenol ethers	250.143	0.100159	48.3	0	-1.44382	-	Not Available	4.237	4.198	4.296	4.281	4.254	4.28	4.296	4.218	4.256	4.321	4.325	4.313	4.307	4.316	4.342	4.335	4.323	4.298	4.455	4.356	4.306	4.34	4.355
pos_9460	Tranexamic Acid	凝血酸	metab_9782	B(ii)	-	-	PW_C008836;HMDB0014447;MJDBOTE0000780	M+H-2H2O	C8H15NO2	3.3382	-	C12535	pos	-	-	-	-	Organic acids and derivatives	Carboxylic acids and derivatives	122.096	0.0158671592137	0	68.8	-0.886981	1197-18-8	Amino acids, peptides, and analogues	4.644	4.508	4.426	4.475	4.335	4.481	4.448	4.481	4.395	4.457	4.383	3.933	4.556	4.427	4.079	4.346	4.371	4.388	3.075	4.443	4.345	4.22	4.347
pos_9466	2-Octenedioic acid	2 -辛二酸	metab_9788	B(ii)	-	-	LMFA01170085;HMDB0000341	M+H	C8H12O4	3.3115	-	-	pos	-	-	-	-	Lipids and lipid-like molecules	Fatty Acyls	173.081	0.15931	0	31.2	-0.977978	5698-50-0	Fatty acids and conjugates	4.028	3.876	3.77	3.723	4.228	3.987	4.097	3.985	3.645	4.083	3.974	4.096	4.076	4.048	3.971	4.13	4.134	4.064	4.544	4.189	4.791	3.978	4.291
pos_9468	Butyryl-L-carnitine	丁酰- L -肉碱	metab_9790	B(i)	-	-	HMDB0002013	M+H	C11H21NO4	3.3062	-	C02862	pos	-	-	-	-	Lipids and lipid-like molecules	Fatty Acyls	232.154	0.107245	63.7	0	-1.50669	25576-40-3	Fatty acid esters	6.398	6.25	6.158	6.173	6.561	6.357	6.412	6.327	6.078	6.419	6.333	6.434	6.392	6.423	6.334	6.45	6.458	6.385	6.859	6.518	7.076	6.336	6.601
pos_9469	2,3,4,5-Tetrahydro-2-pyridinecarboxylic acid	2，3，4，5 -四氢- 2 -吡啶羧酸	metab_9791	B(ii)	map01100;map00310	Metabolic pathways;Lysine degradation	HMDB0012130	M+ACN+H	C6H9NO2	3.3062	代谢途径;赖氨酸降解	C00450	pos	-	-	Metabolism;Metabolism	Global and overview maps;Amino acid metabolism	Organic acids and derivatives	Carboxylic acids and derivatives	169.097	0.0414578699298	0	68.6	-1.93646	73980-78-6	Amino acids, peptides, and analogues	4.746	5.095	4.733	4.689	4.809	4.792	5.245	4.712	4.716	4.87	4.706	5.131	4.719	4.767	5.305	4.958	4.88	4.678	4.853	5.283	4.757	4.932	4.765
pos_9483	Serotonin	5-羟色胺	metab_9807	B(i)	map01100;map05207;map04750;map04540;map04976;map04024;map04080;map04726;map04742;map00380;map04721	Metabolic pathways;Chemical carcinogenesis - receptor activation;Inflammatory mediator regulation of TRP channels;Gap junction;Bile secretion;cAMP signaling pathway;Neuroactive ligand-receptor interaction;Serotonergic synapse;Taste transduction;Tryptophan metabolism;Synaptic vesicle cycle	HMDB0000259;PW_C000178;MJDBSJD0000073	M+ACN+H	C10H12N2O	3.2636	代谢途径;化学致癌作用-受体激活;TRP通道的炎症介质调节;间隙连接;胆汁分泌;cAMP信号通路;神经活性配体-受体相互作用;5-羟色胺能突触;味觉转导;色氨酸代谢;突触小泡循环	C00780	pos	Peptides;Hormones and transmitters	Amines;Neurotransmitters	Metabolism;Human Diseases;Organismal Systems;Cellular Processes;Organismal Systems;Environmental Information Processing;Environmental Information Processing;Organismal Systems;Organismal Systems;Metabolism;Organismal Systems	Global and overview maps;Cancer: overview;Sensory system;Cellular community - eukaryotes;Digestive system;Signal transduction;Signaling molecules and interaction;Nervous system;Sensory system;Amino acid metabolism;Nervous system	Organoheterocyclic compounds	Indoles and derivatives	218.128	0.0720584834282	91.8	0	-1.74446	50-67-9	Tryptamines and derivatives	4.344	4.366	4.627	4.427	4.486	4.236	4.506	4.555	4.486	4.551	4.389	4.287	4.536	4.453	4.304	4.376	4.445	4.696	4.903	4.37	4.408	4.707	4.421
pos_9488	L-DOPA n-Butyl Ester	L -多巴N -丁基酯	metab_9812	B(ii)	-	-	HMDB0253881	M+H-H2O	C13H19NO4	3.2421	-	-	pos	-	-	-	-	Organic acids and derivatives	Carboxylic acids and derivatives	236.128	0.140486	0	41.7	-1.2045	-	Amino acids, peptides, and analogues	4.841	4.81	4.857	4.833	4.857	4.867	4.882	4.834	4.875	4.898	4.872	4.894	4.899	4.906	4.939	4.923	4.922	4.886	5.052	4.944	4.898	4.926	4.949
pos_9489	Thymine	胸腺嘧啶	metab_9813	B(i)	map00240;map01100;map01232	Pyrimidine metabolism;Metabolic pathways;Nucleotide metabolism	HMDB0000262;PW_C000179;MJDBOTE0000713	M+H	C5H6N2O2	3.2421	嘧啶代谢;代谢途径;核苷酸代谢	C00178	pos	Nucleic acids	Bases	Metabolism;Metabolism;Metabolism	Nucleotide metabolism;Global and overview maps;Global and overview maps	Organoheterocyclic compounds	Diazines	127.05	0.0463081607159	46.8	0	-1.11729	65-71-4	Pyrimidines and pyrimidine derivatives	3.937	3.929	4.064	3.946	4.074	4.068	3.997	4.036	4.001	4.025	4.132	3.941	4.091	4.103	4.037	4.098	4.011	4.055	4.221	4.085	4.036	4.032	3.94
pos_9502	Ser Ile Ala	丝氨酸 异亮氨酸 丙氨酸	metab_9829	B(i)	-	-	-	M+H	C12H23N3O5	3.2049	-	-	pos	-	-	-	-	-	-	290.171	0.0675456166008	69.3	0	-1.64655	-	-	3.804	4.086	3.855	4.293	4.062	4.101	3.787	3.651	3.461	3.813	4.079	3.95	3.723	3.847	4.325	3.74	3.973	3.47	3.819	4.184	3.681	3.922	3.706
pos_9517	4-pyridin-4-yl-2-(pyridin-3-ylmethylamino)pyrimidine-5-carboxylic acid	4-吡啶-4-基-2-（吡啶-3-基甲胺基）嘧啶-5-羧酸	metab_9845	B(i)	-	-	-	M+H	C16H13N5O2	3.0607	-	-	pos	-	-	-	-	-	-	308.117	0.0744736	49.3	0	9.60467086718833	-	-	3.505	4.865	3.373	3.369	3.929	3.873	4.986	3.413	3.405	4.65	3.512	4.694	3.635	3.586	4.915	4.625	4.273	3.627	4.177	4.928	4.244	4.605	4
pos_9527	Glu Tyr	谷氨酸 酪氨酸	metab_9856	B(i)	-	-	-	M+H	C14H18N2O6	2.8628	-	-	pos	-	-	-	-	-	-	311.123	0.0348278737201	30.1	0	-1.35294	-	-	4.647	4.277	4.563	4.588	4.769	4.596	4.463	4.528	4.426	4.592	4.848	4.677	4.476	4.604	4.587	4.634	4.567	4.691	4.859	4.374	4.52	4.449	4.473
pos_9529	4-Fluoro-L-phenylalanine	4 -氟- L -苯丙氨酸	metab_9858	B(ii)	-	-	HMDB0246423	2M+H	C9H10FNO2	2.8091	-	C11217	pos	-	-	-	-	Organic acids and derivatives	Carboxylic acids and derivatives	367.149	0.0821881955736	0	38.9	8.06974867170246	-	Amino acids, peptides, and analogues	4.707	4.698	4.686	4.727	4.768	4.708	4.714	4.702	4.796	4.756	4.784	4.765	4.821	4.816	4.717	4.67	4.763	4.777	4.997	4.763	4.814	4.748	4.753
pos_9547	Asp Ile Ser	天冬氨酸 异亮氨酸 丝氨酸	metab_9878	B(i)	-	-	-	M+H	C13H23N3O7	2.2719	-	-	pos	-	-	-	-	-	-	334.16	0.100493	74.4	0	-1.54242	-	-	4.217	4.311	4.139	4.381	4.449	4.296	4.119	4.359	4.052	3.991	4.317	4.293	4.416	4.302	4.325	4.369	4.32	3.987	4.327	4.515	4.314	4.163	4.32
pos_9553	Ethyl-4-hydroxymethyl-3(2H)-Furanone	-	metab_9885	B(ii)	-	-	-	M+H-2H2O	C7H10O3	2.1387	-	-	pos	-	-	-	-	-	-	107.049	0.0724433306795	0	34.6	-0.811	-	-	4.414	4.356	4.409	4.415	4.477	4.417	4.503	4.472	4.374	4.536	4.578	4.516	4.557	4.597	4.512	4.439	4.44	4.448	4.693	4.467	4.562	4.443	4.527
pos_9568	Didanosine	去羟肌苷	metab_9901	B(ii)	-	-	HMDB0015037;PW_C009350	M+ACN+H	C10H12N4O3	2.0705	-	C06953	pos	-	-	-	-	Nucleosides, nucleotides, and analogues	Purine nucleosides	278.124	0.233952	0	48.8	-2.48618	69655-05-6	Purine 2'',3''-dideoxyribonucleosides	3.932	3.633	4.16	4.182	3.782	4.023	4.378	4.025	4.297	3.517	4.028	4.374	3.902	4.13	4.351	3.888	3.873	4.2	4.12	4.41	3.851	4.111	4.199
pos_9569	Vidarabine	阿糖腺苷	metab_9902	B(i)	-	-	HMDB0014340	M+H	C10H13N5O4	2.0705	-	C07195	pos	-	-	-	-	Nucleosides, nucleotides, and analogues	Purine nucleosides	268.104	0.277394	58.6	0	-1.08474	24356-66-9	Not Available	3.552	3.682	3.371	3.624	2.805	3.418	3.608	3.332	4.026	3.675	4.018	3.452	3.295	3.632	3.428	3.591	3.791	2.728	3.746	3.689	3.305	3.082	3.688
pos_9573	Danielone	乙酮，2-羟基-1-（4-羟基-3,5-二甲氧基苯基）-	metab_9907	B(ii)	-	-	HMDB0031704	M+H-H2O	C10H12O5	2.0705	-	C10674	pos	-	-	-	-	Organic oxygen compounds	Organooxygen compounds	195.065	0.137754	0	39.7	-1.36548	90426-22-5	Carbonyl compounds	3.664	3.556	3.762	3.641	3.545	3.582	3.28	3.647	3.471	3.585	3.818	3.568	3.57	3.638	3.595	3.626	3.436	3.491	3.639	3.571	3.472	3.551	3.717
pos_9581	L-3-Aminodihydro-2(3H)-furanone	L-3-氨基二氢-2（3H）-呋喃酮	metab_9916	B(ii)	-	-	HMDB0029387	M+H	C4H7NO2	2.0705	-	C02926	pos	-	-	-	-	Organic acids and derivatives	Carboxylic acids and derivatives	102.055	0.154189	0	31.8	-1.19168	-	Amino acids, peptides, and analogues	4.857	4.83	4.879	4.891	4.932	4.901	4.957	4.924	4.883	4.979	5.034	4.996	5.015	5.047	4.995	4.935	4.925	4.922	5.153	4.94	5.028	4.955	5.015
pos_9592	Tenuazonic Acid	细交链孢菌酮酸	metab_9928	B(i)	-	-	HMDB0036074	M+NH4	C10H15NO3	2.0652	-	C08511	pos	-	-	-	-	Organoheterocyclic compounds	Pyrrolines	215.139	0.146365	57.5	0	-1.69383	610-88-8;27778-66-1	Not Available	4.19	4.237	4.436	4.281	4.058	4.306	4.282	4.152	4.318	4.195	4.504	4.502	4.213	4.359	4.456	4.26	4.147	3.945	4.677	4.259	4.064	4.233	4.506
pos_9601	Propionylglycine	丙酰甘氨酸	metab_9939	B(i)	-	-	HMDB0000783	M+H	C5H9NO3	2.0652	-	-	pos	-	-	-	-	Organic acids and derivatives	Carboxylic acids and derivatives	132.065	0.129955	42.4	0	-1.3703	21709-90-0	Amino acids, peptides, and analogues	3.752	3.695	3.757	3.674	3.767	3.721	3.848	3.715	3.726	3.683	3.736	3.764	3.749	3.673	3.679	3.705	3.708	3.686	3.811	3.641	3.717	3.808	3.719
pos_9613	MDMA	亚甲二氧基甲基苯丙胺	metab_9952	B(i)	-	-	HMDB0254382;HMDB0041931	M+H	C11H15NO2	2.0225	-	C07577	pos	-	-	-	-	Organoheterocyclic compounds	Benzodioxoles	194.117	0.0832113236959	58.3	0	-1.58928	4764-17-4;42542-10-9	Not Available	5.319	5.334	5.323	5.303	5.335	5.345	5.36	5.312	5.332	5.349	5.327	5.35	5.343	5.323	5.365	5.356	5.341	5.317	5.471	5.365	5.333	5.342	5.363
pos_9618	Farnesyl acetone	法尼基丙酮	metab_9957	B(i)	-	-	-	M+H	C18H30O	1.9423	-	-	pos	-	-	-	-	-	-	263.237	0.117768	34.6	0	-1.49055	-	-	4.242	4.252	4.289	4.264	4.334	4.278	4.318	4.264	4.255	4.252	4.282	4.318	4.291	4.323	4.314	4.293	4.277	4.285	4.457	4.361	4.323	4.246	4.353
pos_9628	2-Amino-4-methylpyridine	2 -氨基- 4 -甲基吡啶	metab_9967	B(ii)	-	-	HMDB0246517	M+H	C6H8N2	1.7969	-	-	pos	-	-	-	-	Organoheterocyclic compounds	Pyridines and derivatives	109.076	0.0961014350093	0	32	-1.30264	-	Aminopyridines and derivatives	3.722	4.567	3.648	3.685	4.107	4.034	4.874	3.74	3.747	4.491	3.746	4.518	3.807	3.916	4.817	4.318	4.235	3.734	3.973	4.884	4.116	4.304	4.075
pos_9639	(2-Hydroxyethoxy)acetic acid	（2-羟基乙氧基）乙酸	metab_9979	B(ii)	-	-	HMDB0242471	M+H-H2O	C4H8O4	1.4924	-	-	pos	-	-	-	-	Organic acids and derivatives	Carboxylic acids and derivatives	103.039	0.252963	0	30.1	-1.02334	-	Carboxylic acids	3.725	3.677	3.768	3.748	3.735	3.786	3.783	3.789	3.8	3.776	3.786	3.861	3.832	3.832	3.799	3.777	3.816	3.812	3.983	3.848	3.856	3.847	3.856
pos_964	DG(22:6(4Z,7Z,11E,13Z,15E,19Z)-2OH(10S,17)/i-13:0/0:0)	-	metab_9980	B(ii)	-	-	HMDB0298686	2M+3H2O+2H, M+ACN+H	C38H62O7	6.2489	-	-	pos	-	-	-	-	Not Available	Not Available	644.457	0.0445578200436	0	42	-6.36223	-	Not Available	6.983	6.997	6.862	7.012	6.949	6.963	6.849	6.929	6.962	7.002	6.966	7.029	6.941	6.958	6.961	6.888	6.983	6.921	6.995	6.875	6.935	6.941	6.994
pos_9653	1,2-Epithiopropane	1，2 -环硫丙烷	metab_9995	B(ii)	-	-	HMDB0302172	2M+NH4	C3H6S	1.2632	-	-	pos	-	-	-	-	Organoheterocyclic compounds	Thiiranes	166.072	0.212332	0	50.4	1.96179902037535	-	Not Available	3.8	3.695	3.823	3.757	3.822	3.826	3.663	3.837	3.934	3.735	3.885	3.821	3.808	3.925	3.868	3.88	3.815	3.866	4.063	3.775	3.877	3.879	3.682
pos_9654	Epinephrine	肾上腺素	metab_9996	B(ii)	map01100;map05207;map04261;map04080;map04024;map04923;map04924;map00350	Metabolic pathways;Chemical carcinogenesis - receptor activation;Adrenergic signaling in cardiomyocytes;Neuroactive ligand-receptor interaction;cAMP signaling pathway;Regulation of lipolysis in adipocytes;Renin secretion;Tyrosine metabolism	HMDB0000068;PW_C000048;MJDBOTE0000810	M+CH3OH+H	C9H13NO3	1.2523	代谢途径;化学致癌作用-受体激活;心肌细胞的肾上腺素能信号传导;神经活性配体-受体相互作用;cAMP信号通路;脂肪细胞脂解的调控;肾素分泌;酪氨酸代谢	C00788	pos	Hormones and transmitters;Hormones and transmitters	Other hormones;Neurotransmitters	Metabolism;Human Diseases;Organismal Systems;Environmental Information Processing;Environmental Information Processing;Organismal Systems;Organismal Systems;Metabolism	Global and overview maps;Cancer: overview;Circulatory system;Signaling molecules and interaction;Signal transduction;Endocrine system;Endocrine system;Amino acid metabolism	Benzenoids	Phenols	216.123	0.220446	0	65.8	-1.99449	51-43-4	Benzenediols	4.203	4.19	4.251	4.197	4.205	4.242	4.216	4.19	4.24	4.254	4.273	4.289	4.289	4.318	4.31	4.287	4.292	4.253	4.451	4.301	4.304	4.246	4.298
pos_9658	D-Glucaro-1,4-lactone	D-葡萄糖二酸1，4-内酯	metab_10000	B(ii)	-	-	HMDB0041862	M+NH4	C6H8O7	1.2309	-	C21095	pos	-	-	-	-	Organoheterocyclic compounds	Lactones	210.061	0.149688	0	48.6	-1.40267	5027-63-4	Gamma butyrolactones	3.923	3.378	3.897	3.531	3.704	3.779	3.649	3.684	3.817	3.889	3.874	3.993	3.717	3.878	3.641	3.909	3.906	3.956	4.242	3.805	3.725	3.895	3.734
pos_9672	Pyridoxal	吡哆醛	metab_10016	B(i)	map01100;map00750;map04977;map01240	Metabolic pathways;Vitamin B6 metabolism;Vitamin digestion and absorption;Biosynthesis of cofactors	HMDB0001545;PW_C001188	M+H	C8H9NO3	1.1513	代谢途径;维生素B6代谢;维生素的消化和吸收;辅助因子的生物合成	C00250	pos	Vitamins and cofactors	Vitamins	Metabolism;Metabolism;Organismal Systems;Metabolism	Global and overview maps;Metabolism of cofactors and vitamins;Digestive system;Global and overview maps	Organoheterocyclic compounds	Pyridines and derivatives	168.065	0.141733	80.5	0	-1.19117	66-72-8	Pyridine carboxaldehydes	4.168	3.915	3.963	4.089	4.046	4.069	3.855	3.946	3.774	4.058	4.058	3.993	3.998	4.123	3.881	4.034	3.888	3.883	4.415	3.91	4.086	3.941	4.137
pos_9673	2,6-Diaminopurine 2',3'-dideoxyriboside	2，6 -二氨基嘌呤2 '，3 ' -二脱氧核苷	metab_10017	B(ii)	-	-	HMDB0250896	M+Na	C10H14N6O2	1.146	-	-	pos	-	-	-	-	Nucleosides, nucleotides, and analogues	Purine nucleosides	273.108	0.128799	0	40.4	2.3606554360189502	-	Purine 2'',3''-dideoxyribonucleosides	3.589	2.789	3.857	3.355	3.285	3.492	3.873	3.693	4.213	3.045	3.609	4.039	2.402	3.607	4.046	4.011	2.6	3.754	3.878	2.96	4.027	3.089	3.803
pos_9675	Imexon	氨基二氮双环己烯酮	metab_10019	B(ii)	-	-	HMDB0253411	M+H	C4H5N3O	1.1301	-	-	pos	-	-	-	-	Organoheterocyclic compounds	Diazines	112.05	0.0592659671736	0	56.2	-1.33304	-	Pyrimidines and pyrimidine derivatives	5.293	5.254	5.301	5.288	5.274	5.29	5.275	5.308	5.305	5.268	5.36	5.222	5.378	5.338	5.26	5.319	5.31	5.215	5.407	5.295	5.264	5.279	5.282
pos_9710	Betalamate	-	metab_10059	B(ii)	-	-	HMDB0304273;HMDB0029842	M+K	C9H7NO5-2	0.9329	-	C08538	pos	-	-	-	-	Alkaloids and derivatives	Betalains	247.997	0.117712	0	37.1	8.85416921342808	18766-66-0	Not Available	5.18	4.943	5.129	5.199	5.301	5.189	5.136	5.095	5.2	5.2	5.187	5.173	5.142	5.296	5.143	5.225	5.034	5.214	5.464	5.296	5.383	5.13	5.16
pos_9711	N-Hydroxy-1-aminonaphthalene	N -羟基- 1-萘胺	metab_10060	B(ii)	map00980	Metabolism of xenobiotics by cytochrome P450	HMDB0062503	M+NH4	C10H9NO	0.9329	细胞色素P450异生素代谢	C14789	pos	-	-	Metabolism	Xenobiotics biodegradation and metabolism	Benzenoids	Naphthalenes	177.102	0.152577	0	33	-1.72623	607-30-7	Not Available	4.035	3.955	4.069	4.038	4.094	4.077	3.908	4.119	4.176	4.149	4.106	3.994	4.038	4.103	4.045	4.031	4.037	4.126	4.141	4.041	4.128	4.1	3.993
pos_9714	2-(beta-D-Mannopyranosyl)-L-tryptophan	2-（β-D-吡喃甘露糖基）-L-色氨酸	metab_10063	B(ii)	-	-	HMDB0258059	M+H	C17H22N2O7	0.9222	-	-	pos	-	-	-	-	Organoheterocyclic compounds	Pyridines and derivatives	367.149	0.0552709022897	0	47.4	-1.76807	-	Phenylpyridines	4.441	4.341	4.416	4.396	4.426	4.376	4.356	4.32	4.488	4.449	4.488	4.488	4.504	4.535	4.405	4.324	4.408	4.436	4.699	4.429	4.465	4.455	4.398
pos_9723	Pyrogallol-2-O-glucuronide	邻苯三酚- 2 - O -葡萄糖醛酸苷	metab_10073	B(ii)	-	-	HMDB0060017	M+H	C12H14O9	0.8423	-	-	pos	-	-	-	-	Organic oxygen compounds	Organooxygen compounds	303.071	0.296955	0	42.3	-1.61276	-	Carbohydrates and carbohydrate conjugates	3.444	3.777	3.747	2.993	2.967	3.729	2.931	3.607	3.776	4.321	4.295	2.996	3.687	4.829	3.771	4.146	4.208	2.979	4.942	3.563	4.004	2.956	3.743
pos_9725	5-Hydroxy-L-tryptophan	5-羟色氨酸	metab_10075	B(ii)	map01100;map04726;map00380	Metabolic pathways;Serotonergic synapse;Tryptophan metabolism	PW_C000358;HMDB0000472	M+H	C11H12N2O3	0.8314	代谢途径;5-羟色胺能突触;色氨酸代谢	C00643	pos	-	-	Metabolism;Organismal Systems;Metabolism	Global and overview maps;Nervous system;Amino acid metabolism	Organoheterocyclic compounds	Indoles and derivatives	221.092	0.0215440732764	0	82.4	-1.63762	4350-09-08	Tryptamines and derivatives	3.681	3.671	2.907	3.029	3.75	3.186	4.068	3.425	3.107	3.896	3.63	3.768	3.684	3.471	4.032	3.756	3.881	2.931	3.69	4.188	3.318	3.7	3.028
pos_9729	O-Succinyl-L-homoserine	O -琥珀酰- L -高丝氨酸	metab_10079	B(ii)	map01100;map00270;map00920;map01230	Metabolic pathways;Cysteine and methionine metabolism;Sulfur metabolism;Biosynthesis of amino acids	HMDB0255868	M+H-2H2O	C8H13NO6	0.8261	代谢途径;半胱氨酸和蛋氨酸代谢;硫代谢;氨基酸生物合成	C01118	pos	-	-	Metabolism;Metabolism;Metabolism;Metabolism	Global and overview maps;Amino acid metabolism;Energy metabolism;Global and overview maps	Organic acids and derivatives	Carboxylic acids and derivatives	184.06	0.123079	0	62.5	-1.26467	1492-23-5	Amino acids, peptides, and analogues	4.524	4.475	4.484	4.521	4.632	4.555	4.552	4.545	4.051	4.658	3.791	3.843	4.218	4.79	4.719	4.149	4.445	4.506	4.914	4.688	4.875	4.338	3.75
pos_9731	15-Hydroxynorandrostene-3,17-dione glucuronide	15 -羟基降雄烯- 3，17 -二酮葡萄糖醛酸苷	metab_10082	B(ii)	map01100;map00040;map04976;map00053;map01240	Metabolic pathways;Pentose and glucuronate interconversions;Bile secretion;Ascorbate and aldarate metabolism;Biosynthesis of cofactors	LMST05010033;HMDB0010353	M+H-H2O	C24H32O9	0.8208	代谢途径;戊糖和葡萄糖醛酸相互转化;胆汁分泌;抗坏血酸和醛酸代谢;辅助因子的生物合成	C03033	pos	-	-	Metabolism;Metabolism;Organismal Systems;Metabolism;Metabolism	Global and overview maps;Carbohydrate metabolism;Digestive system;Carbohydrate metabolism;Global and overview maps	Lipids and lipid-like molecules	Steroids and steroid derivatives	447.202	0.0526520611451	0	34.6	0.97684589336559	131749-23-0	Steroidal glycosides	4.357	4.078	4.281	4.104	4.569	4.348	4.503	4.39	3.868	4.809	4.884	4.673	4.459	4.927	4.464	4.218	3.882	4.155	4.971	4.393	4.749	4.21	4.747
pos_9734	Piperidine	哌啶	metab_10085	B(i)	map04974	Protein digestion and absorption	HMDB0034301	M+H	C5H11N	0.8208	蛋白质的消化和吸收	C01746	pos	-	-	Organismal Systems	Digestive system	Organoheterocyclic compounds	Piperidines	86.0963	0.0342234	69.2	0	-1.53651	110-89-4	Not Available	7.071	7.015	7.071	6.981	7.126	7.058	7.164	7.074	6.925	7.217	7.205	7.16	7.131	7.214	7.134	7.092	6.98	7.024	7.311	7.079	7.177	7.048	7.207
pos_9735	ALA-ILE	-	metab_10086	B(i)	-	-	HMDB0028690	M+H	C9H18N2O3	0.8208	-	-	pos	-	-	-	-	Organic acids and derivatives	Carboxylic acids and derivatives	203.139	0.0573101014335	32.3	0	-1.72547	29727-65-9	Amino acids, peptides, and analogues	4.615	4.721	4.68	4.819	4.795	4.736	4.468	4.605	4.49	4.488	4.777	4.593	4.628	4.478	4.905	4.672	4.71	4.472	4.452	4.902	4.521	4.617	4.493
pos_9744	Pro Val	脯氨酸 缬氨酸	metab_10096	B(i)	-	-	-	M+H	C10H18N2O3	0.8155	-	-	pos	-	-	-	-	-	-	215.139	0.052127	48.5	0	-1.63564	-	-	4.597	4.653	4.871	4.686	4.442	4.69	4.684	4.554	4.727	4.668	5.03	4.907	4.591	4.742	4.804	4.636	4.622	4.27	5.063	4.577	4.445	4.632	4.916
pos_9751	Oxiracetam	羟氧吡醋胺	metab_10104	B(ii)	-	-	HMDB0255986	M+H-2H2O	C6H10N2O3	0.8101	-	-	pos	-	-	-	-	Organic acids and derivatives	Carboxylic acids and derivatives	123.055	0.101556	0	38.7	-1.07699	-	Amino acids, peptides, and analogues	5.095	5.037	5.287	5.082	4.957	5.081	5.111	5.065	5.232	5.283	5.159	5.179	5.274	5.18	5.25	5.009	5.022	4.83	5.342	5.101	4.856	5.03	5.073
pos_9761	Ile Arg Asp	异亮氨酸 精氨酸 天冬氨酸	metab_10115	B(i)	-	-	-	M+H	C16H30N6O6	0.7623	-	-	pos	-	-	-	-	-	-	403.229	0.0546221115792	36.3	0	-1.86087	-	-	4.306	4.235	4.23	4.173	4.232	4.237	4.04	4.134	3.532	4.408	4.393	4.277	4.207	4.552	4.29	4.139	4.23	3.663	4.52	4.348	3.873	3.781	4.38
pos_9766	Picolinamide	吡啶酰胺	metab_10120	B(ii)	-	-	HMDB0256533	M+H	C6H6N2O	0.7623	-	C01950	pos	-	-	-	-	Organoheterocyclic compounds	Pyridines and derivatives	123.055	0.0700183924413	0	33.1	-1.41194	1452-77-3	Pyridinecarboxylic acids and derivatives	5.29	5.193	5.402	5.223	5.135	5.285	5.333	5.254	5.318	5.49	5.358	5.329	5.453	5.428	5.403	5.192	5.149	4.985	5.554	5.251	5.09	5.215	5.37
pos_977	Tauroursodeoxycholic acid	牛磺熊去氧胆酸	metab_10124	B(ii)	-	-	LMST05040015;HMDB0000874	M+H-H2O, M+H	C26H45NO6S	6.2595	-	C16868	pos	-	-	-	-	Lipids and lipid-like molecules	Steroids and steroid derivatives	500.303	0.159442	0	31	-2.63293	14605-22-2	Bile acids, alcohols and derivatives	4.901	4.41	5.495	2.224	4.713	4.785	5.864	5.379	5.001	3.845	4.897	5.071	5.751	5.069	5.178	4.843	4.282	4.538	3.828	3.782	5.515	5.271	4.268
pos_9775	Alanylvaline	丙氨酰缬氨酸	metab_10130	B(ii)	-	-	HMDB0028700	M+H-H2O	C8H16N2O3	0.757	-	-	pos	-	-	-	-	Organic acids and derivatives	Carboxylic acids and derivatives	171.113	0.126786	0	35.1	-1.08279	3303-45-5	Amino acids, peptides, and analogues	4.436	4.465	4.502	4.496	4.371	4.317	4.435	4.515	4.578	4.49	4.55	4.469	4.59	4.514	4.36	4.5	4.557	4.545	4.891	4.404	4.423	4.664	4.584
pos_9786	3-Dehydroquinic acid	3 ~脱氢奎尼酸	metab_10141	B(ii)	map01100;map00400;map01230	Metabolic pathways;Phenylalanine, tyrosine and tryptophan biosynthesis;Biosynthesis of amino acids	HMDB0012710	M+H	C7H10O6	0.7516	代谢途径;苯丙氨酸、酪氨酸和色氨酸生物合成;氨基酸生物合成	C00944	pos	-	-	Metabolism;Metabolism;Metabolism	Global and overview maps;Amino acid metabolism;Global and overview maps	Organic acids and derivatives	Hydroxy acids and derivatives	191.055	0.0469399733558	0	55.6	-1.51971	10534-44-8	Alpha hydroxy acids and derivatives	4.072	3.813	3.824	3.978	3.922	3.897	3.91	3.873	3.871	3.834	3.778	3.819	3.684	3.482	3.924	3.927	3.596	3.689	3.876	3.76	3.98	3.877	3.495
pos_9807	3,6-Dimethylpyrazine-2-thiol	3，6 -二甲基吡嗪- 2 -硫醇	metab_10164	B(ii)	-	-	HMDB0246079	2M+Na	C6H8N2S	0.7251	-	-	pos	-	-	-	-	Organoheterocyclic compounds	Diazines	303.071	0.0400329629231	0	32.2	-1.05206	-	Pyrazines	3.457	3.546	3.833	2.688	2.791	3.66	3.257	3.188	3.57	4.176	3.98	3.177	3.719	4.417	3.505	3.677	3.791	2.674	4.517	3.291	3.647	2.651	3.695
pos_9823	2-Hydroxyhept-5-enoylcarnitine	2-羟基庚-5-烯酰肉碱	metab_10181	B(ii)	-	-	HMDB0241687	M+H-2H2O	C14H25NO5	0.7092	-	-	pos	-	-	-	-	Lipids and lipid-like molecules	Fatty Acyls	252.159	0.112407	0	87.8	-1.11721	-	Fatty acid esters	4.216	4.151	4.299	4.123	4.12	4.189	4.037	4.035	4.056	4.248	4.155	3.646	4.114	4.146	3.924	3.98	3.827	3.745	4.325	3.89	4.083	3.781	4.195
pos_9826	Dimethylsulfide	二甲基硫	metab_10184	B(ii)	map01100;map00920	Metabolic pathways;Sulfur metabolism	HMDB0002303	M+ACN+H	C2H6S	0.6985	代谢途径;硫代谢	C00580	pos	-	-	Metabolism;Metabolism	Global and overview maps;Energy metabolism	Organosulfur compounds	Thioethers	104.053	0.0306259932318	0	34.6	-1.9941	75-18-3	Dialkylthioethers	5.591	5.475	5.611	5.541	5.577	5.566	5.548	5.547	5.407	5.665	5.738	5.648	5.546	5.693	5.599	5.53	5.54	5.484	5.784	5.539	5.53	5.455	5.587
pos_9836	Cerulenin	浅蓝菌素	metab_10195	B(ii)	-	-	HMDB0015168;LMFA08010013	M+NH4	C12H17NO3	0.688	-	C12058	pos	-	-	-	-	Organoheterocyclic compounds	Epoxides	241.154	0.0460809369502	0	31.6	-1.68926	17397-89-6	Oxirane carboxylic acids and derivatives	5.359	5.306	5.368	5.324	5.306	5.334	5.305	5.29	5.348	5.47	5.393	5.346	5.267	5.423	5.265	5.191	5.276	5.231	5.552	5.183	5.271	5.198	5.337
pos_9837	1-Hydroxy-2,2,5,5-tetramethylpyrrolidine-3-carboxylic acid	1-羟基-2,2,5,5-四甲基吡咯烷-3-羧酸	metab_10196	B(ii)	-	-	HMDB0243895	M+ACN+H	C9H17NO3	0.688	-	-	pos	-	-	-	-	Organoheterocyclic compounds	Pyrrolidines	229.154	0.0585693724857	0	31.1	-2.00816	-	Pyrrolidine carboxylic acids and derivatives	5.977	5.772	5.989	5.828	5.914	5.901	5.792	5.88	5.925	5.978	5.946	5.937	5.854	5.942	5.956	5.688	5.916	5.777	6.064	5.706	5.91	5.793	5.838
pos_9844	1,3-Butadiene	3-丁二烯	metab_10204	B(ii)	-	-	HMDB0041792	M+NH4	C4H6	0.688	-	C16450	pos	-	-	-	-	Hydrocarbons	Unsaturated hydrocarbons	72.0807	0.0253006159477	0	50.5	-1.29154	106-99-0	Olefins	5.871	5.764	5.819	5.747	5.905	5.844	5.915	5.829	5.656	5.994	5.976	5.945	5.877	5.985	5.904	5.839	5.75	5.809	6.06	5.839	5.93	5.812	5.985
pos_9848	Asp Leu Arg	天冬氨酸 亮氨酸 精氨酸	metab_10208	B(i)	-	-	-	M+H	C16H30N6O6	0.6827	-	-	pos	-	-	-	-	-	-	403.229	0.0100384582317	61	0	-1.91738	-	-	5.275	5.227	5.196	5.166	5.14	5.214	5.045	5.022	4.451	5.296	5.34	5.311	5.117	5.378	5.209	5.065	5.232	4.533	5.369	5.256	4.774	4.731	5.266
pos_9856	Cytidine	胞苷	metab_10217	B(i)	map00240;map01100;map02010;map01232	Pyrimidine metabolism;Metabolic pathways;ABC transporters;Nucleotide metabolism	PW_C000061;HMDB0248553;HMDB0000089;MJDBOTE0000789	M+H	C9H13N3O5	0.6827	嘧啶代谢;代谢途径;ABC转运器;核苷酸代谢	C00475	pos	Nucleic acids	Nucleosides	Metabolism;Metabolism;Environmental Information Processing;Metabolism	Nucleotide metabolism;Global and overview maps;Membrane transport;Global and overview maps	Nucleosides, nucleotides, and analogues	Pyrimidine nucleosides	244.092	0.0769686178813	89.2	0	-1.8601	65-46-3	Not Available	5.248	5.077	5.23	5.122	5.196	5.18	5.278	5.176	5.024	5.215	5.319	5.287	5.159	5.154	5.166	5.262	5.095	5.205	5.26	5.224	5.309	5.251	4.995
pos_9860	Beta-Thujaplicin	Beta -欧侧柏酚	metab_10222	B(ii)	-	-	HMDB0035213	M+2Na-H	C10H12O2	0.6827	-	C09904	pos	-	-	-	-	Hydrocarbon derivatives	Tropones	209.055	0.14937	0	67.6	3.13870165279776	499-44-5	Tropolones	4.354	4.488	4.366	4.421	4.329	4.4	4.444	4.398	4.544	4.424	4.281	4.268	4.261	4.325	4.403	4.346	4.488	4.442	4.431	4.389	4.344	4.423	4.243
pos_9861	Alpha-Methyl-m-tyrosine	-	metab_10223	B(ii)	-	-	HMDB0248232	M+H-H2O	C10H13NO3	0.6827	-	C11820	pos	-	-	-	-	Phenylpropanoids and polyketides	Phenylpropanoic acids	178.086	0.0981648968977	0	41.3	-1.60795	305-96-4	Not Available	4.883	4.581	4.608	4.589	4.938	4.732	4.838	4.858	4.599	4.805	4.521	4.758	4.76	4.422	4.671	4.764	4.691	4.653	4.916	4.591	4.626	4.852	4.535
pos_9862	4-Methyl-1H-pyrrole-3-carboxamide	4 -甲基- 1H -吡咯- 3 -甲酰胺	metab_10224	B(ii)	-	-	HMDB0246501	M+2Na-H	C6H8N2O	0.6827	-	-	pos	-	-	-	-	Organoheterocyclic compounds	Pyrroles	169.035	0.0254216123837	0	34.4	4.14756837030139	-	Pyrrole carboxylic acids and derivatives	6.103	5.848	6.147	6.072	6.013	6.049	5.984	6.037	6.089	6.056	6.057	6.014	5.919	6.015	6.004	6.035	5.974	5.936	6.46	5.927	6.495	5.993	6.006
pos_9864	Aminoadipic acid	氨基己二酸	metab_10226	B(ii)	map01100;map01210;map00310;map01230	Metabolic pathways;2-Oxocarboxylic acid metabolism;Lysine degradation;Biosynthesis of amino acids	PW_C000390;HMDB0000510;LMFA01170098;HMDB0302754	M+H-H2O	C6H11NO4	0.6827	代谢途径;2-氧代羧酸代谢;赖氨酸降解;氨基酸生物合成	C00956	pos	-	-	Metabolism;Metabolism;Metabolism;Metabolism	Global and overview maps;Global and overview maps;Amino acid metabolism;Global and overview maps	Organic acids and derivatives	Carboxylic acids and derivatives	144.065	0.0780263630598	0	58.7	-1.26596	1118-90-7;542-32-5	Amino acids, peptides, and analogues	4.899	5.075	4.903	4.847	5.008	4.891	5.346	4.789	4.901	5.065	4.967	5.155	4.809	5.038	5.255	5.006	4.98	4.732	5.31	5.326	4.968	4.975	4.96
pos_9865	L-Galactose	半乳糖	metab_10227	B(ii)	map01100;map00053;map01240	Metabolic pathways;Ascorbate and aldarate metabolism;Biosynthesis of cofactors	HMDB0033704	M+H-2H2O	C6H12O6	0.6827	代谢途径;抗坏血酸和醛酸代谢;辅助因子的生物合成	C01825	pos	Carbohydrates	Monosaccharides	Metabolism;Metabolism;Metabolism	Global and overview maps;Carbohydrate metabolism;Global and overview maps	Organic oxygen compounds	Organooxygen compounds	145.049	0.0356994	0	49.8	-1.15606	12772-65-5;15572-79-9	Carbohydrates and carbohydrate conjugates	5.467	5.379	5.38	5.342	5.452	5.427	5.434	5.425	5.427	5.385	5.436	5.473	5.449	5.428	5.454	5.452	5.437	5.476	5.489	5.521	5.49	5.513	5.473
pos_9866	Pentanamide	戊酰胺	metab_10228	B(ii)	-	-	HMDB0256275;LMFA08010002	M+ACN+H	C5H11NO	0.6827	-	C01842	pos	-	-	-	-	Lipids and lipid-like molecules	Fatty Acyls	143.118	0.0228359554541	0	52.3	-2.27383	626-97-1	Fatty amides	4.88	4.964	5.145	5.091	4.912	5.014	5.054	4.967	5.347	4.707	5.101	4.814	4.879	4.958	4.592	5.079	4.846	5.043	5.017	5.121	4.916	5.137	4.612
pos_9869	Cytosine	胞嘧啶	metab_10231	B(i)	map00240;map01100;map01232	Pyrimidine metabolism;Metabolic pathways;Nucleotide metabolism	HMDB0000630;MJDBOTE0000458	M+H	C4H5N3O	0.6827	嘧啶代谢;代谢途径;核苷酸代谢	C00380	pos	Nucleic acids	Bases	Metabolism;Metabolism;Metabolism	Nucleotide metabolism;Global and overview maps;Global and overview maps	Organoheterocyclic compounds	Diazines	112.05	0.0326383024187	97.8	0	-1.44206	71-30-7	Pyrimidines and pyrimidine derivatives	5.686	5.62	5.692	5.644	5.669	5.683	5.699	5.671	5.594	5.681	5.785	5.648	5.707	5.699	5.631	5.714	5.639	5.574	5.774	5.643	5.687	5.645	5.642
pos_9876	Cytosine deoxyribonucleoside	胞嘧啶脱氧核糖核苷	metab_10239	B(ii)	map00240;map01100;map02010;map01232	Pyrimidine metabolism;Metabolic pathways;ABC transporters;Nucleotide metabolism	HMDB0250725;HMDB0000014	M+Na	C9H13N3O4	0.6774	嘧啶代谢;代谢途径;ABC转运器;核苷酸代谢	C00881	pos	Nucleic acids	Nucleosides	Metabolism;Metabolism;Environmental Information Processing;Metabolism	Nucleotide metabolism;Global and overview maps;Membrane transport;Global and overview maps	Nucleosides, nucleotides, and analogues	Pyrimidine nucleosides	250.079	0.0411216	0	54.5	-2.00709	951-77-9	Pyrimidine 2''-deoxyribonucleosides	4.807	4.886	4.952	5.085	4.944	4.836	4.81	5.087	4.915	4.827	4.882	4.57	5.27	5.073	4.768	4.827	4.78	4.754	5.064	4.754	4.714	4.855	4.779
pos_9886	Isoleucylproline	异亮氨酰脯氨酸	metab_10250	B(ii)	-	-	HMDB0011174	M+CH3OH+H	C11H20N2O3	0.6721	-	-	pos	-	-	-	-	Organic acids and derivatives	Carboxylic acids and derivatives	261.18	0.251813	0	34	-1.97891	37462-92-3	Amino acids, peptides, and analogues	4.381	4.142	4.148	3.856	4.136	4.154	4.234	3.718	3.93	4.241	4.031	4.286	3.765	3.903	4.229	4.279	4.149	4.215	4.22	4.034	4.194	3.986	4.18
pos_9897	N-Acetylgalactosamine	N-乙酰氨基半乳糖	metab_10262	B(ii)	map05146	Amoebiasis	HMDB0000212	M+Na	C8H15NO6	0.6667	阿米巴病	C01074	pos	-	-	Human Diseases	Infectious disease: parasitic	Organic oxygen compounds	Organooxygen compounds	244.079	0.0919916429802	0	30.3	-1.4729	1811-31-0	Carbohydrates and carbohydrate conjugates	4.924	4.862	4.841	4.911	4.821	4.876	4.952	4.88	4.899	4.943	4.889	4.892	4.886	4.988	4.849	4.852	4.761	4.781	5.081	4.734	4.82	4.798	4.827
pos_9900	Normetanephrine	去甲变肾上腺素	metab_10267	B(ii)	map01100;map00350	Metabolic pathways;Tyrosine metabolism	PW_C000654;HMDB0000819	M+H-H2O	C9H13NO3	0.6667	代谢途径;酪氨酸代谢	C05589	pos	-	-	Metabolism;Metabolism	Global and overview maps;Amino acid metabolism	Benzenoids	Phenols	166.084	0.0912490016093	0	47.9	-9.72348	97-31-4	Methoxyphenols	4.526	4.498	4.536	4.405	4.677	4.583	4.471	4.65	4.47	4.53	4.311	4.485	4.746	4.445	4.366	4.58	4.421	4.554	4.623	4.282	4.5	4.512	4.234
pos_9905	Bisulepine	-	metab_10272	B(ii)	-	-	HMDB0251490	M+K	C17H19NS2	0.6615	-	-	pos	-	-	-	-	Organoheterocyclic compounds	Benzothiepins	340.06	0.19583	0	35.4	2.8801174939186	-	Not Available	4.139	4.027	4.235	4.101	4.213	4.189	4.092	3.952	4.186	4.247	4.263	4.162	4.053	4.379	4.163	4.119	4.038	3.857	4.196	3.872	4.087	3.994	3.515
pos_9938	2-Oxo-4-hydroxy-4-carboxy-5-ureidoimidazole	2-氧代-4-羟基-4-羧基-5-脲基咪唑	metab_10308	B(ii)	map01100;map00230	Metabolic pathways;Purine metabolism	HMDB0301917;HMDB0059663	M+NH4	C5H6N4O5	0.6349	代谢途径;嘌呤代谢	C12248	pos	-	-	Metabolism;Metabolism	Global and overview maps;Nucleotide metabolism	Organic acids and derivatives	Carboxylic acids and derivatives	220.066	0.00855008782625	0	55.4	-5.73317	1320343-65-4	Amino acids, peptides, and analogues	5.05	5.012	5.036	5.067	5.116	5.094	5.101	5.045	5.171	5.091	5.062	5.089	5.102	5.12	5.175	5.087	5.01	5.063	5.228	4.997	5.04	5.04	5.037
pos_9948	N(6)-Methyllysine	N（6）-甲基赖氨酸	metab_10319	B(ii)	-	-	HMDB0002038	M+CH3OH+H	C7H16N2O2	0.6297	-	C02728	pos	-	-	-	-	Organic acids and derivatives	Carboxylic acids and derivatives	193.154	0.0256762884092	0	75.9	-1.93305	1188-07-4	Amino acids, peptides, and analogues	5.614	5.693	5.672	5.611	5.471	5.653	5.72	5.515	5.81	5.781	5.741	5.625	5.573	5.75	5.648	5.687	5.625	5.668	5.913	5.65	5.661	5.534	5.582
pos_9955	Val-Cit	-	metab_10327	B(ii)	-	-	HMDB0259738	M+NH4	C11H22N4O4	0.6244	-	-	pos	-	-	-	-	Organic acids and derivatives	Carboxylic acids and derivatives	292.197	0.0372785581347	0	31.4	-1.58957	-	Amino acids, peptides, and analogues	4.659	5.025	4.992	5.271	5.207	5.042	4.311	5.229	5.302	5.226	5.181	5.163	5.393	5.239	4.801	5.178	4.905	5.196	5.355	5.062	5.22	5.141	5.136
pos_9963	3-Aminopropionaldehyde	3 -氨基丙醛	metab_10335	B(ii)	map01100;map00770;map00410;map01240	Metabolic pathways;Pantothenate and CoA biosynthesis;beta-Alanine metabolism;Biosynthesis of cofactors	PW_C000866;HMDB0001106	M+H	C3H7NO	0.6244	代谢途径;泛酸和CoA生物合成;β-丙氨酸代谢;辅助因子的生物合成	C05665	pos	-	-	Metabolism;Metabolism;Metabolism;Metabolism	Global and overview maps;Metabolism of cofactors and vitamins;Metabolism of other amino acids;Global and overview maps	Organic oxygen compounds	Organooxygen compounds	74.06	0.0271061659107	0	33.2	-1.06439	352-92-1	Carbonyl compounds	4.455	4.432	4.478	4.393	4.421	4.433	4.546	4.342	4.513	4.539	4.512	4.54	4.38	4.533	4.524	4.466	4.435	4.311	4.606	4.495	4.348	4.357	4.54
pos_9978	L-Carnitine	L-肉碱	metab_10351	B(i)	map05415;map04976;map04714	Diabetic cardiomyopathy;Bile secretion;Thermogenesis	PW_C000044;HMDB0000062;MJDBOTE0000806	M+H	C7H15NO3	0.6191	糖尿病性心肌病;胆汁分泌;产热	C00318	pos	-	-	Human Diseases;Organismal Systems;Organismal Systems	Cardiovascular disease;Digestive system;Environmental adaptation	Organic nitrogen compounds	Organonitrogen compounds	162.112	0.0227582680895	95.4	0	-1.91564	541-15-1	Quaternary ammonium salts	6.365	6.305	6.027	6.138	6.288	6.253	6.297	6.344	6.394	6.031	6.194	6.356	6.342	6.126	6.37	6.352	6.424	6.395	6.177	6.41	6.217	6.525	6.369
pos_9979	L-3-Cyanoalanine	L - 3 -氰丙氨酸	metab_10352	B(ii)	map01100	Metabolic pathways	HMDB0060245	M+ACN+H	C4H6N2O2	0.6191	代谢途径	C02512	pos	-	-	Metabolism	Global and overview maps	Organic acids and derivatives	Carboxylic acids and derivatives	156.077	0.0713513493827	0	33.8	-2.19855	6232-19-5	Amino acids, peptides, and analogues	4.651	4.62	4.618	4.565	4.572	4.63	4.69	4.536	4.617	4.652	4.638	4.701	4.551	4.534	4.689	4.612	4.618	4.597	4.765	4.613	4.611	4.628	4.645
pos_9983	2,3-Diaminopyridine	2,3-二氨基吡啶	metab_10357	B(i)	-	-	-	M+H	C5H7N3	0.6191	-	-	pos	-	-	-	-	-	-	110.071	0.185892	40.7	0	-1.79362	-	-	3.848	3.877	3.859	3.898	3.847	3.834	3.973	3.896	3.902	3.959	3.938	3.979	3.888	3.803	4.054	3.872	3.866	3.862	3.969	3.901	3.887	3.945	3.97
pos_9995	N'-[(4-Oxo-4H-chromen-3-yl)methylene]nicotinohydrazide	N’-[（4-氧代-4H-色烯-3-基）亚甲基]烟肼	metab_10370	B(ii)	-	-	HMDB0258486	M+2Na-H	C16H11N3O3	0.6138	-	-	pos	-	-	-	-	Organoheterocyclic compounds	Benzopyrans	338.049	0.137282	0	33.1	-6.27672	-	1-benzopyrans	4.57	4.425	4.459	4.287	4.247	4.328	4.566	4.024	4.122	4.731	4.485	4.362	4.011	4.591	4.366	4.34	4.393	3.76	4.702	4.468	3.943	4.086	4.531
pos_268	2-Hydroxycinnamic acid	2 -羟基肉桂酸	metab_10375	B(i)	map01100;map00360	Metabolic pathways;Phenylalanine metabolism	HMDB0002641;HMDB0041592	M+H, M+NH4, M+H-H2O	C9H8O3	0.688	代谢途径;苯丙氨酸代谢	C05838;C01772	pos	-	-	Metabolism;Metabolism	Global and overview maps;Amino acid metabolism	Phenylpropanoids and polyketides	Cinnamic acids and derivatives	182.081	0.0537779733801	74.4	0	-1.87788	495-79-4;614-60-8	Hydroxycinnamic acids and derivatives	6.336	6.208	6.316	6.331	6.382	6.326	6.283	6.299	6.157	6.329	6.516	6.345	6.289	6.368	6.327	6.307	6.179	6.291	6.49	6.13	6.302	6.243	6.307
pos_10302	4-Aminobutyraldehyde	4 -氨基丁醛	metab_10376	B(ii)	map01100;map00330;map00410	Metabolic pathways;Arginine and proline metabolism;beta-Alanine metabolism	HMDB0001080	M+H-H2O	C4H9NO	0.5131	代谢途径;精氨酸和脯氨酸代谢;β-丙氨酸代谢	C00555	pos	-	-	Metabolism;Metabolism;Metabolism	Global and overview maps;Amino acid metabolism;Metabolism of other amino acids	Organic oxygen compounds	Organooxygen compounds	70.065	0.0305349079992	0	30.9	-0.889307	4390-05-0	Carbonyl compounds	3.988	3.556	3.807	3.684	3.631	3.754	3.979	3.546	3.674	3.721	3.743	3.768	3.581	3.81	4.001	3.549	3.808	3.415	3.898	3.626	3.481	3.43	3.746
pos_88	4-Hydroxycinnamic acid	对羟基肉桂酸	metab_10377	B(ii)	map01100;map00130;map00350	Metabolic pathways;Ubiquinone and other terpenoid-quinone biosynthesis;Tyrosine metabolism	HMDB0030677;HMDB0002035;HMDB0003654	M+H, M+NH4, M+H-H2O	C9H8O3	1.7111	代谢途径;泛醌和其他萜类醌生物合成;酪氨酸代谢	C00811	pos	-	-	Metabolism;Metabolism;Metabolism	Global and overview maps;Metabolism of cofactors and vitamins;Amino acid metabolism	Phenylpropanoids and polyketides	Cinnamic acids and derivatives	182.081	0.0398530875367	0	33.1	-1.86866	501-98-4;7400-08-0;501-98-4;4501-31-9;20649-40-5	Hydroxycinnamic acids and derivatives	6.547	6.419	6.535	6.515	6.594	6.53	6.488	6.508	6.396	6.526	6.734	6.548	6.497	6.564	6.555	6.509	6.422	6.538	6.706	6.372	6.519	6.463	6.503
pos_9822	Acetylcysteine	乙酰半胱氨酸	metab_10378	B(ii)	-	-	HMDB0000574;HMDB0001890;MJDBOTE0001037	M+H-H2O	C5H9NO3S	0.7145	-	C06809	pos	-	-	-	-	Organic acids and derivatives	Carboxylic acids and derivatives	146.027	0.0233805191472	0	33.5	-1.19988	52-90-4;616-91-1	Amino acids, peptides, and analogues	5.097	4.611	4.956	4.772	5.027	4.967	4.731	4.59	4.694	4.872	4.971	4.906	4.489	4.764	4.672	4.766	4.828	4.576	5.253	4.491	4.752	4.512	4.744
pos_9788	Aconitic acid	乌头酸	metab_10379	B(i)	map01100;map01210;map00020;map00630	Metabolic pathways;2-Oxocarboxylic acid metabolism;Citrate cycle (TCA cycle);Glyoxylate and dicarboxylate metabolism	HMDB0000072;HMDB0000958;HMDB0247961	M+H	C6H6O6	0.7516	代谢途径;2-氧代羧酸代谢;柠檬酸盐循环（TCA循环）;乙醛酸和二羧酸代谢	C00417;C02341	pos	Organic acids	Carboxylic acids	Metabolism;Metabolism;Metabolism;Metabolism	Global and overview maps;Global and overview maps;Carbohydrate metabolism;Carbohydrate metabolism	Organic acids and derivatives	Carboxylic acids and derivatives	175.023	0.0469465640705	42.8	0	-1.66771	585-84-2;4023-65-8	Tricarboxylic acids and derivatives	4.361	3.935	4.281	3.939	4.183	4.179	4.077	4	4.105	4.259	4.238	4.368	3.968	4.231	3.982	4.247	4.161	4.176	4.421	4.06	3.862	4.092	4.081
pos_7122	Alpha-Muricholic Acid	Alpha-鼠胆酸	metab_10380	B(i)	-	-	HMDB0000364;HMDB0000415;LMST04010066;HMDB0000506;HMDB0000865;MJDBDZS0000028	2M+H	C24H40O5	6.1752	-	C17647	pos	-	-	-	-	Lipids and lipid-like molecules	Steroids and steroid derivatives	817.581	0.0711779	85.5	0	-2.13676	2393-58-0;39016-49-4;2393-59-1;6830-03-1	Bile acids, alcohols and derivatives	5.294	5.006	4.484	5.612	4.994	4.685	5.54	5.571	5.449	5.433	4.402	5.56	5.394	5.899	5.066	5.643	5.305	4.61	6.41	4.653	5.733	4.469	5.686
pos_2391	Benzoic Acid	苯甲酸	metab_10381	B(i)	map01100	Metabolic pathways	HMDB0001870;HMDB0013676;HMDB0304270;HMDB0004461;HMDB0303719;HMDB0013677;HMDB0006115;MJDBOTE0000832	M+H-H2O	C7H6O2	4.3105	代谢途径	C00261	pos	-	-	Metabolism	Global and overview maps	Benzenoids	Benzene and substituted derivatives	105.033	0.0701069	78	0	-1.04774	303-07-1;55-21-0;65-85-0;100-52-7;99-10-5	Benzoic acids and derivatives	5.628	5.538	5.24	5.282	5.664	5.519	5.478	5.396	5.614	5.577	5.539	5.442	5.336	5.604	5.744	5.556	5.561	5.418	5.575	5.585	5.401	5.282	5.272
pos_1195	Bis(2-ethylhexyl)phthalate	-	metab_10382	B(i)	map05207	Chemical carcinogenesis - receptor activation	HMDB0249243;HMDB0251427	M+H, M+Na	C24H38O4	6.8018	化学致癌作用-受体激活	C03690	pos	-	-	Human Diseases	Cancer: overview	Benzenoids	Benzene and substituted derivatives	391.284	0.0854743326425	55.6	0	-1.69195	117-81-7	Benzoic acids and derivatives	5.298	5.087	5.135	4.977	5.017	5.025	5.099	4.975	5.085	5.193	5.143	5.136	5.108	5.035	5.129	5.067	5.222	5.043	5.23	5.222	5.189	5.003	5
pos_9620	D-TYROSINE	D-酪氨酸	metab_10383	B(i)	-	-	HMDB0250803	M+H	C9H11NO3	1.9206	-	C06420	pos	Peptides	Amino acids	-	-	Organic acids and derivatives	Carboxylic acids and derivatives	182.081	0.0961560864558	61.3	0	-1.41604	556-02-5	Amino acids, peptides, and analogues	3.965	3.789	3.915	3.862	3.897	3.856	3.915	3.961	3.784	3.85	4.091	4.072	4.005	3.998	3.914	3.977	3.802	3.97	4.114	3.852	4.005	3.863	3.871
pos_1891	Dhurrin	蜀黍氰苷	metab_10384	B(ii)	map01100	Metabolic pathways	HMDB0060471;HMDB0030704	M+CH3OH+H	C14H17NO7	0.7198	代谢途径	C05143	pos	-	-	Metabolism	Global and overview maps	Organic oxygen compounds	Organooxygen compounds	344.133	0.133279	0	47.4	-1.70717	21401-21-8;499-20-7	Carbohydrates and carbohydrate conjugates	4.15	3.813	4.287	4.055	4.209	3.998	4.217	4.268	3.882	4.285	4.452	4.363	4.345	4.273	4.17	4.29	4.065	4.296	4.324	3.998	4.374	4.158	4.044
pos_8259	Dodecanoic acid	十二酸	metab_10385	B(ii)	map01100;map00061	Metabolic pathways;Fatty acid biosynthesis	PW_C000497;HMDB0000638;HMDB0002262;LMFA01010012;HMDB0303347;HMDB0303348	M+NH4	C12H24O2	5.874	代谢途径;脂肪酸生物合成	C02679	pos	Lipids	Fatty acids	Metabolism;Metabolism	Global and overview maps;Lipid metabolism	Lipids and lipid-like molecules	Fatty Acyls	218.211	0.14715	0	41.5	-1.73468	143-07-7;1908-11-8	Fatty acids and conjugates	4.261	4.142	4.188	4.215	4.457	4.585	4.334	4.081	4.198	4.14	4.071	4.113	4.122	4.116	4.153	4.064	4.097	4.053	4.426	4.11	4.164	4.214	4.145
pos_9070	Epiandrosterone	表雄甾酮	metab_10386	B(ii)	-	-	HMDB0000365;HMDB0000031;LMST02020023	M+ACN+Na	C19H30O2	4.5347	-	C07635	pos	-	-	-	-	Lipids and lipid-like molecules	Steroids and steroid derivatives	354.238	0.0813605072935	0	51	-7.31486	481-29-8;53-41-8	Androstane steroids	4.356	4.278	4.36	4.277	4.298	4.313	4.257	4.217	4.317	4.262	4.224	4.328	4.285	4.263	4.293	4.2	4.29	4.214	4.355	4.321	4.257	4.252	4.298
pos_2185	Estradiol	雌二醇	metab_10387	B(ii)	-	-	PW_C000098;HMDB0000151;HMDB0303648;MJDBOTE0000772	M+ACN+Na	C18H24O2	3.5245	-	C12859	pos	-	-	-	-	Lipids and lipid-like molecules	Steroids and steroid derivatives	336.191	0.297551	0	34.2	-7.76998	50-28-2	Estrane steroids	3.077	3.436	3.882	3.671	3.146	3.069	3.752	3.912	3.865	3.744	3.827	3.686	4.237	4.072	3.693	3.986	4.088	4.172	4.721	3.849	4.002	4.288	4.079
pos_7965	Estrone	雌酮	metab_10388	B(i)	map01100;map00140;map04913;map04917	Metabolic pathways;Steroid hormone biosynthesis;Ovarian steroidogenesis;Prolactin signaling pathway	HMDB0000145;PW_C000094;LMST02010004;HMDB0001425;MJDBOTE0000769	M+H-H2O	C18H22O2	5.9852	代谢途径;类固醇激素生物合成;卵巢类固醇生成;催乳素信号通路	C00468	pos	Steroids;Hormones and transmitters	18-Carbon atoms;Steroid hormones	Metabolism;Metabolism;Organismal Systems;Organismal Systems	Global and overview maps;Lipid metabolism;Endocrine system;Endocrine system	Lipids and lipid-like molecules	Steroids and steroid derivatives	253.159	0.118629	37.1	0	1.56634424656391	481-97-0;53-16-7	Estrane steroids	4.404	4.391	4.433	4.185	4.386	4.365	4.442	4.356	4.36	4.465	4.388	4.372	4.446	4.418	4.41	4.427	4.411	4.327	4.643	4.411	4.379	4.372	4.408
pos_2222	Indole-3-Carboxaldehyde	吲哚-3-甲醛	metab_10389	B(i)	-	-	HMDB0000195;HMDB0000197;HMDB0029737;MJDBSJD0000088	M+H	C9H7NO	3.6955	-	C08493	pos	-	-	-	-	Nucleosides, nucleotides, and analogues	Purine nucleosides	146.06	0.0826089634296	82.9	0	-1.53095	87-51-4;487-89-8;58-63-9	Not Available	6.345	6.184	6.351	6.248	6.406	6.345	6.326	6.343	6.333	6.362	6.442	6.372	6.451	6.454	6.416	6.384	6.417	6.451	6.486	6.343	6.367	6.325	6.395
pos_9959	L-Glutamate	谷氨酸	metab_10390	B(i)	map02010;map01240;map01200;map00330;map00220;map00250;map04072;map04216;map00630;map00430;map04964;map00470;map00860;map04080;map05016;map05017;map05014;map04727;map04742;map04723;map05031;map04721;map04720;map01100;map00480;map04540;map01210;map00340;map00524;map01230;map04068;map05034;map04724;map05030;map00650;map00910;map04974;map04713;map00970;map05230;map05033;map04730;map05022	ABC transporters;Biosynthesis of cofactors;Carbon metabolism;Arginine and proline metabolism;Arginine biosynthesis;Alanine, aspartate and glutamate metabolism;Phospholipase D signaling pathway;Ferroptosis;Glyoxylate and dicarboxylate metabolism;Taurine and hypotaurine metabolism;Proximal tubule bicarbonate reclamation;D-Amino acid metabolism;Porphyrin metabolism;Neuroactive ligand-receptor intera…	HMDB0003339;HMDB0000148;HMDB0060475	M+H	C5H9NO4	0.6244	ABC转运器;辅助因子的生物合成;碳代谢;精氨酸和脯氨酸代谢;精氨酸生物合成;丙氨酸、天冬氨酸和谷氨酸代谢;磷脂酶D信号通路;铁死亡;乙醛酸和二羧酸代谢;牛磺酸和亚牛磺酸代谢;近端小管碳酸氢盐回收;D-氨基酸代谢;卟啉代谢;神经活性配体-受体相互作用;亨廷顿舞蹈症;脊髓小脑共济失调;肌萎缩侧索硬化症;GABA能突触;味觉转导;逆行内源性大麻素信号传导;苯丙胺成瘾;突触小泡循环;长期增益效应;代谢途径;谷胱甘肽代谢;间隙连接;2-氧代羧酸代谢;组氨酸代谢;新霉素、卡那霉素和庆大霉素的生物合成;氨基酸生物合成;FoxO信号通路;酒精中毒;谷氨酸能突触;可卡因成瘾;丁酸代谢;氮代谢;蛋白质的消化和吸收;昼夜节律夹带;氨酰基tRNA生物合成;癌症的中心碳代谢;尼古丁成瘾;长时程抑制;神经退行性变的途径-多种疾病	C00025	pos	Peptides;Hormones and transmitters	Amino acids;Neurotransmitters	Environmental Information Processing;Metabolism;Metabolism;Metabolism;Metabolism;Metabolism;Environmental Information Processing;Cellular Processes;Metabolism;Metabolism;Organismal Systems;Metabolism;Metabolism;Environmental Information Processing;Human Diseases;Human Diseases;Human Diseases;Organismal Systems;Organismal Systems;Organismal Systems;Human Diseases;Organismal Systems;Organismal Syst…	Membrane transport;Global and overview maps;Global and overview maps;Amino acid metabolism;Amino acid metabolism;Amino acid metabolism;Signal transduction;Cell growth and death;Carbohydrate metabolism;Metabolism of other amino acids;Excretory system;Metabolism of other amino acids;Metabolism of cofactors and vitamins;Signaling molecules and interaction;Neurodegenerative disease;Neurodegenerative …	Organic acids and derivatives	Carboxylic acids and derivatives	148.06	0.0125372899988	78.5	0	-1.59565	6893-26-1;56-86-0	Amino acids, peptides, and analogues	5.179	5.078	5.126	5.027	4.93	5.085	5.137	4.858	5.033	5.282	5.223	5.197	4.876	5.241	5.026	5.093	5.01	4.764	5.239	5.096	5.002	4.887	5.225
pos_3239	Lawsone	散沫花素	metab_10391	B(ii)	-	-	HMDB0030773;HMDB0253997	M+ACN+H	C10H6O3	5.9852	-	C10368	pos	-	-	-	-	Benzenoids	Naphthalenes	216.065	0.0569550105236	0	75.6	-2.10956	83-72-7;481-39-0	Naphthoquinones	4.592	4.616	4.665	4.539	4.565	4.571	4.737	4.621	4.542	4.593	4.616	4.56	4.627	4.526	4.663	4.56	4.511	4.515	4.979	4.697	4.586	4.558	4.556
pos_2764	M-Cresol	-	metab_10392	B(ii)	-	-	HMDB0002048;HMDB0001858	2M+NH4	C7H8O	5.4147	-	C01467	pos	-	-	-	-	Benzenoids	Phenols	234.148	0.0849562606795	0	50.6	-1.68988	108-39-4;106-44-5	Cresols	3.971	3.665	3.942	3.874	3.925	3.899	3.678	3.991	3.704	3.837	3.902	3.743	3.906	3.928	3.913	4.049	3.689	3.886	3.997	3.909	3.85	3.785	3.877
pos_3501	N-Choloylglycine	N -胆酰甘氨酸	metab_10393	B(ii)	map01100;map04979;map04976;map00120	Metabolic pathways;Cholesterol metabolism;Bile secretion;Primary bile acid biosynthesis	HMDB0000148;HMDB0255104;HMDB0000138	M+H-2H2O	C26H43NO6	6.075	代谢途径;胆固醇代谢;胆汁分泌;初级胆汁酸生物合成	C01921	pos	Steroids	24-Carbon atoms	Metabolism;Organismal Systems;Organismal Systems;Metabolism	Global and overview maps;Digestive system;Digestive system;Lipid metabolism	Organic acids and derivatives	Carboxylic acids and derivatives	430.295	0.0546390101264	0	75.4	-1.36293	475-31-0;56-86-0	Amino acids, peptides, and analogues	5.146	4.759	5.521	4.888	4.696	5.09	5.819	5.594	5.321	5.372	5.174	5.268	5.274	5.539	5.258	5.534	4.624	4.873	5.77	4.076	5.824	5.063	5.4
pos_312	Ornithine	鸟氨酸	metab_10394	B(i)	map01100;map00220;map02010;map01210;map00470;map00330;map00480;map01230	Metabolic pathways;Arginine biosynthesis;ABC transporters;2-Oxocarboxylic acid metabolism;D-Amino acid metabolism;Arginine and proline metabolism;Glutathione metabolism;Biosynthesis of amino acids	HMDB0003374;HMDB0000214;PW_C000140;MJDBOTE0000357	M+H-H2O, M+H	C5H12N2O2	0.5131	代谢途径;精氨酸生物合成;ABC转运器;2-氧代羧酸代谢;D-氨基酸代谢;精氨酸和脯氨酸代谢;谷胱甘肽代谢;氨基酸生物合成	C00077	pos	Peptides	Amino acids	Metabolism;Metabolism;Environmental Information Processing;Metabolism;Metabolism;Metabolism;Metabolism;Metabolism	Global and overview maps;Amino acid metabolism;Membrane transport;Global and overview maps;Metabolism of other amino acids;Amino acid metabolism;Metabolism of other amino acids;Global and overview maps	Organic acids and derivatives	Carboxylic acids and derivatives	133.097	0.0355949759081	98.6	0	-1.7159	70-26-8;348-66-3;3184-13-2	Amino acids, peptides, and analogues	5.016	4.563	4.821	4.669	4.602	4.771	4.986	4.566	4.684	4.68	4.726	4.734	4.549	4.789	5.028	4.532	4.816	4.416	4.935	4.599	4.452	4.399	4.768
pos_2166	P-Coumaric Acid	-	metab_10395	B(i)	map01100;map00130;map00350	Metabolic pathways;Ubiquinone and other terpenoid-quinone biosynthesis;Tyrosine metabolism	HMDB0030677;HMDB0002035;HMDB0003654;MJDBOTE0000719	M+H	C9H8O3	3.4395	代谢途径;泛醌和其他萜类醌生物合成;酪氨酸代谢	C00811	pos	-	-	Metabolism;Metabolism;Metabolism	Global and overview maps;Metabolism of cofactors and vitamins;Amino acid metabolism	Phenylpropanoids and polyketides	Cinnamic acids and derivatives	165.054	0.0959784	56.1	0	-1.68526	501-98-4;7400-08-0;501-98-4;4501-31-9;20649-40-5	Hydroxycinnamic acids and derivatives	3.586	4.157	3.732	3.573	3.855	3.831	4.563	3.6	3.535	4.045	3.759	4.177	3.55	3.797	4.402	3.981	3.862	3.573	3.95	4.47	3.914	3.912	3.808
pos_8930	Penicillic Acid	青霉酸	metab_10396	B(i)	-	-	HMDB0256217	M+H-2H2O	C8H10O4	4.8982	-	C19495;C16804	pos	-	-	-	-	Organic acids and derivatives	Keto acids and derivatives	135.044	0.0550213557257	55.2	0	-1.25858	17397-87-4;90-65-3	Medium-chain keto acids and derivatives	4.771	4.35	4.209	3.99	4.454	4.454	3.924	4.264	3.941	3.994	3.967	3.947	3.951	4.322	4.016	3.967	3.677	3.803	4.551	3.927	3.678	3.734	4.228
pos_9783	Phenol	苯酚	metab_10397	B(i)	map01100;map04974;map00350;map05208	Metabolic pathways;Protein digestion and absorption;Tyrosine metabolism;Chemical carcinogenesis - reactive oxygen species	HMDB0013674;PW_C000153;HMDB0000228	M+H	C6H6O	0.757	代谢途径;蛋白质的消化和吸收;酪氨酸代谢;化学致癌作用-活性氧	C00146	pos	-	-	Metabolism;Organismal Systems;Metabolism;Human Diseases	Global and overview maps;Digestive system;Amino acid metabolism;Cancer: overview	Benzenoids	Phenols	95.049	0.136435	33.4	0	-1.24013	108-95-2;87-66-1	Benzenetriols and derivatives	3.445	3.271	3.49	3.383	3.543	3.397	3.331	3.364	3.374	3.522	3.726	3.452	3.44	3.522	3.476	3.455	3.413	3.439	3.558	3.249	3.346	3.358	3.356
pos_3737	Sulfolithocholylglycine	硫石胆酸甘氨酸	metab_10398	B(ii)	-	-	HMDB0000698;HMDB0002639;HMDB0062801	M+NH4	C26H43NO7S	6.1436	-	C11301	pos	-	-	-	-	Lipids and lipid-like molecules	Steroids and steroid derivatives	531.309	0.0415722138711	0	69.7	-1.30108	15324-64-8;474-74-8	Bile acids, alcohols and derivatives	5.563	5.892	5.613	4.776	5.817	5.49	5.937	5.443	6.17	5.566	5.81	5.63	6.119	5.517	5.825	5.857	5.888	5.961	5.752	6.117	6.288	6.481	5.2
pos_92	Trans-Cinnamic acid	反式肉桂酸	metab_10399	B(ii)	map01100;map00130;map00360	Metabolic pathways;Ubiquinone and other terpenoid-quinone biosynthesis;Phenylalanine metabolism	HMDB0000930;HMDB0000567	M+H-H2O, M+NH4, M+H	C9H8O2	2.1294	代谢途径;泛醌和其他萜类醌生物合成;苯丙氨酸代谢	C00423	pos	-	-	Metabolism;Metabolism;Metabolism	Global and overview maps;Metabolism of cofactors and vitamins;Amino acid metabolism	Phenylpropanoids and polyketides	Cinnamic acids and derivatives	166.086	0.0357737282011	0	60.4	-1.91736	140-10-3;102-94-3	Cinnamic acids	6.798	6.751	6.799	6.808	6.859	6.808	6.882	6.841	6.746	6.888	6.949	6.89	6.905	6.957	6.872	6.792	6.776	6.798	7.054	6.793	6.923	6.788	6.877
pos_4880	Vitamin A	维生素A	metab_10400	B(ii)	map01100;map00830;map04977;map01240	Metabolic pathways;Retinol metabolism;Vitamin digestion and absorption;Biosynthesis of cofactors	HMDB0000305;PW_C000209;HMDB0006216;LMPR01090001	M+H	C20H30O	6.9886	代谢途径;视黄醇代谢;维生素的消化和吸收;辅助因子的生物合成	C00473	pos	Vitamins and cofactors	Vitamins	Metabolism;Metabolism;Organismal Systems;Metabolism	Global and overview maps;Metabolism of cofactors and vitamins;Digestive system;Global and overview maps	Lipids and lipid-like molecules	Prenol lipids	287.236	0.0568773706612	0	44.2	-1.74192	22737-96-8;68-26-8;68-26-8;11103-57-4	Retinoids	4.194	4.064	3.381	4.14	3.985	4.202	4.171	3.529	3.615	4.305	4.012	3.829	3.975	4.086	3.811	4.137	3.864	3.609	4.264	3.162	3.59	4.141	4.344
neg_10	Ursocholic acid	-	metab_10402	B(ii)	-	-	HMDB0249206;HMDB0000917;LMST04010088	M-H, M+FA-H, M+Cl, 2M-H	C24H40O5	6.2726	-	C17644	neg	-	-	-	-	Lipids and lipid-like molecules	Steroids and steroid derivatives	815.567	0.00788678737586	0	58.1	-1.56878	2955-27-3	Bile acids, alcohols and derivatives	7.329	7.052	7.109	7.215	7.52	7.277	7.473	7.426	7.508	7.34	7.307	7.428	7.617	7.644	7.162	7.563	7.468	7.135	7.68	7.445	7.529	7.172	7.668
neg_1002	PE(15:0/22:2(13Z,16Z))	-	metab_10426	B(ii)	map01100;map00564;map00563;map04136;map05167;map04723;map04140	Metabolic pathways;Glycerophospholipid metabolism;Glycosylphosphatidylinositol (GPI)-anchor biosynthesis;Autophagy - other;Kaposi sarcoma-associated herpesvirus infection;Retrograde endocannabinoid signaling;Autophagy - animal	PW_C004957;HMDB0008909;LMGP02010471	M+Cl, M+FA-H	C42H80NO8P	6.4642	代谢途径;甘油磷脂代谢;糖基磷脂酰肌醇（GPI）-锚定生物合成;自噬-其他;卡波西肉瘤相关疱疹病毒感染;逆行内源性大麻素信号传导;自噬-动物	C00350	neg	Lipids	Phospholipids	Metabolism;Metabolism;Metabolism;Cellular Processes;Human Diseases;Organismal Systems;Cellular Processes	Global and overview maps;Lipid metabolism;Glycan biosynthesis and metabolism;Transport and catabolism;Infectious disease: viral;Nervous system;Transport and catabolism	Lipids and lipid-like molecules	Glycerophospholipids	802.559	0.0574240838765	0	83.8	-1.69272	-	Glycerophosphoethanolamines	7.218	7.304	7.306	7.288	7.234	7.139	7.211	7.329	7.27	7.261	7.414	7.276	7.242	7.132	7.298	7.158	7.194	7.284	7.101	7.393	7.181	7.334	7.156
neg_1006	(x)-2-Heptanol glucoside	（x） -2-庚醇葡萄糖苷	metab_10470	B(ii)	-	-	HMDB0035028	M-H, M+FA-H	C13H26O6	6.4854	-	-	neg	-	-	-	-	Lipids and lipid-like molecules	Fatty Acyls	323.171	0.0753322439773	0	34.3	-0.279753	-	Fatty acyl glycosides	4.19	4.222	4.162	4.23	4.277	4.26	4.465	4.094	4.033	4.409	4.074	4.324	4.105	4.219	4.736	4.312	4.333	4.167	4.126	4.438	4.174	4.328	4.241
neg_1009	11'-Carboxy-alpha-chromanol	11 ' -羧基- α -色醇	metab_10503	B(ii)	-	-	HMDB0012515	M-H, M+FA-H	C26H42O4	6.5013	-	-	neg	-	-	-	-	Lipids and lipid-like molecules	Prenol lipids	417.3	0.0850080445139	0	38.6	-1.68635	-	Sesquiterpenoids	5.366	5.327	5.523	5.219	5.451	5.391	5.345	5.408	5.456	5.376	5.368	5.338	5.232	5.354	5.384	5.411	5.29	5.113	5.251	5.219	5.266	5.256	5.353
neg_1012	Glabric acid	-	metab_10537	B(ii)	-	-	HMDB0034689	M-H2O-H, M+FA-H	C30H46O5	6.5122	-	C17764	neg	-	-	-	-	Lipids and lipid-like molecules	Prenol lipids	467.317	0.0899290937564	0	34.6	0.35697364259817	22327-86-2	Triterpenoids	4.543	4.586	4.68	4.471	4.639	4.581	4.376	4.494	4.522	4.311	4.523	4.62	4.444	4.367	4.418	4.56	4.388	4.267	4.598	4.62	4.479	4.372	4.671
neg_1014	PS(20:1(11Z)/PGF1alpha)	-	metab_10559	B(ii)	-	-	HMDB0282245	M-H2O-H, M-H	C46H84NO13P	6.4589	-	-	neg	-	-	-	-	Not Available	Not Available	870.546	0.0358489857196	0	33.4	-4.15035	-	Not Available	5.287	5.322	5.351	5.321	5.25	5.179	5.242	5.157	5.335	5.258	5.237	5.328	5.399	5.306	5.412	5.36	5.287	5.436	5.297	5.344	5.354	5.349	5.334
neg_10148	Methionyl-Proline	蛋氨酸-脯氨酸	metab_10568	B(ii)	-	-	HMDB0028981	M+Cl	C10H18N2O3S	0.515	-	-	neg	-	-	-	-	Organic acids and derivatives	Carboxylic acids and derivatives	281.073	0.00742083250683	0	39.6	-2.10742	-	Amino acids, peptides, and analogues	4.667	4.627	4.5	4.784	4.566	4.654	4.448	4.617	4.823	4.765	4.774	4.663	4.661	4.644	4.69	4.587	4.653	4.598	4.68	4.408	4.624	4.685	4.69
neg_1018	LysoPC(18:1(11Z)/0:0)	-	metab_10603	B(ii)	map00564;map05231	Glycerophospholipid metabolism;Choline metabolism in cancer	HMDB0010385	M+Cl, M+FA-H	C26H52NO7P	6.5388	甘油磷脂代谢;癌症的胆碱代谢	C04230	neg	Lipids	Phospholipids	Metabolism;Human Diseases	Lipid metabolism;Cancer: overview	Lipids and lipid-like molecules	Glycerophospholipids	566.345	0.0150976534913	0	92	-1.82402	-	Glycerophosphocholines	6.829	6.717	6.726	6.779	6.882	6.816	6.907	6.661	6.693	6.767	6.802	6.803	6.725	6.709	6.734	6.823	6.659	6.775	6.743	6.738	6.694	6.592	6.802
neg_1020	DG(i-21:0/LTE4/0:0)	-	metab_10626	B(ii)	-	-	HMDB0300246	M-H2O-H, M+FA-H	C47H83NO8S	6.5548	-	-	neg	-	-	-	-	Not Available	Not Available	802.559	0.0806599311103	0	84.1	-8.71006	-	Not Available	7.32	7.296	7.289	7.344	7.255	7.299	7.261	7.17	7.287	7.4	7.356	7.312	7.319	7.22	7.359	7.31	7.256	7.334	7.315	7.382	7.348	7.309	7.285
neg_10215	Threonic Acid	苏糖酸	metab_10643	B(i)	map01100;map00053	Metabolic pathways;Ascorbate and aldarate metabolism	HMDB0000943	M-H	C4H8O5	0.0091	代谢途径;抗坏血酸和醛酸代谢	C01620	neg	-	-	Metabolism;Metabolism	Global and overview maps;Carbohydrate metabolism	Organic oxygen compounds	Organooxygen compounds	135.031	0.108157	53.8	0	9.061490140943599	7306-96-9	Carbohydrates and carbohydrate conjugates	4.544	4.555	4.531	4.549	4.55	4.579	4.524	4.495	4.502	4.546	4.518	4.519	4.5	4.49	4.491	4.459	4.445	4.491	4.483	4.466	4.423	4.446	4.491
neg_1022	3-Ethyl-4-(9-hydroxy-4,6,8,10-tetramethyl-7-oxododec-4-en-2-yl)oxetan-2-one	3-乙基-4-（9-羟基-4,6,8,10-四甲基-7-氧代十二烷基-4-烯-2-基）氧杂环戊烷-2-酮	metab_10648	B(ii)	-	-	HMDB0251673	M+FA-H, 2M-H	C21H36O4	6.3683	-	-	neg	-	-	-	-	Lipids and lipid-like molecules	Prenol lipids	397.259	0.0254904777218	0	82.1	-0.829796	-	Terpene lactones	5.582	5.306	5.338	5.469	5.493	5.424	5.293	5.464	5.351	5.489	5.368	5.456	5.43	5.505	5.37	5.611	5.408	5.07	5.585	5.292	5.294	5.075	5.342
neg_103	Saterinone	沙特力农	metab_10665	B(ii)	-	-	HMDB0257504	M-H, M+Cl, M+FA-H	C27H30N4O4	5.9269	-	-	neg	-	-	-	-	Organoheterocyclic compounds	Azoles	519.229	0.0429742151182	0	52.6	8.78865622882717	-	Imidazoles	4.406	4.552	4.598	4.902	4.54	4.6	3.921	4.661	4.481	4.619	4.815	4.597	4.683	4.565	4.584	4.512	4.531	4.927	3.952	4.032	4.466	4.597	4.744
neg_1042	LysoPE(P-16:0/0:0)	-	metab_10679	B(ii)	-	-	HMDB0011152	M-H, 2M-H	C21H44NO6P	6.5921	-	-	neg	-	-	-	-	Lipids and lipid-like molecules	Glycerophospholipids	436.283	0.0091907825066	0	73.3	-1.63277	174062-72-7	Glycerophosphoethanolamines	6.778	6.705	6.702	6.868	6.677	6.745	6.758	6.567	6.781	6.864	6.842	6.848	6.598	6.784	6.682	6.705	6.77	6.58	6.711	6.747	6.441	6.698	6.767
neg_1046	DG(20:4(5Z,8Z,11Z,14Z)-OH(17)/13:0/0:0)	-	metab_10683	B(ii)	-	-	HMDB0294846	M-H, M+FA-H	C36H62O6	6.6294	-	-	neg	-	-	-	-	Not Available	Not Available	589.447	0.0355987424486	0	55.7	-1.36157	-	Not Available	5.588	5.54	5.588	5.615	5.702	5.562	5.565	5.666	5.597	5.65	5.575	5.577	5.572	5.68	5.586	5.629	5.52	5.484	5.499	5.587	5.514	5.523	5.525
neg_1050	8,11-eicosadiynoic acid	8，11 -二十碳二炔酸	metab_10688	B(i)	-	-	LMFA01030688	M-H, 2M-H	C20H32O2	6.64	-	-	neg	-	-	-	-	-	-	303.232	0.0420204487443	73.3	0	-1.67799	-	-	6.501	6.512	6.545	6.71	6.669	6.618	6.59	6.514	6.596	6.587	6.592	6.529	6.494	6.451	6.545	6.484	6.516	6.628	6.524	6.546	6.466	6.569	6.701
neg_1060	Tsugaric acid A	-	metab_10699	B(ii)	-	-	HMDB0032022	M-H2O-H, M-H	C32H50O4	6.6881	-	-	neg	-	-	-	-	Lipids and lipid-like molecules	Prenol lipids	497.362	0.10761	0	67.3	-2.70293	-	Triterpenoids	5.169	4.892	5.372	4.443	4.871	5.081	3.95	4.939	4.829	4.431	4.3	4.384	4.31	4.707	4.606	4.459	4.874	4.326	4.68	4.393	4.776	4.264	5.054
neg_1068	LysoPC(17:0/0:0)	-	metab_10706	B(ii)	map00564;map05231	Glycerophospholipid metabolism;Choline metabolism in cancer	HMDB0012108	M+Cl, M+FA-H	C25H52NO7P	6.5868	甘油磷脂代谢;癌症的胆碱代谢	C04230	neg	Lipids	Phospholipids	Metabolism;Human Diseases	Lipid metabolism;Cancer: overview	Lipids and lipid-like molecules	Glycerophospholipids	554.346	0.0211306488405	0	83.2	-1.64225	50930-23-9	Glycerophosphocholines	6.603	6.425	6.624	6.64	6.481	6.589	6.395	6.332	6.361	6.605	6.538	6.55	6.517	6.599	6.528	6.431	6.459	6.428	6.575	6.432	6.501	6.322	6.563
neg_1077	PS(18:1(9Z)/20:0)	-	metab_10716	B(ii)	map01100;map00564;map05146;map05322;map00260;map05140	Metabolic pathways;Glycerophospholipid metabolism;Amoebiasis;Systemic lupus erythematosus;Glycine, serine and threonine metabolism;Leishmaniasis	PW_C060813;LMGP03010957;HMDB0112411	M-H, M+Cl	C44H84NO10P	6.7147	代谢途径;甘油磷脂代谢;阿米巴病;系统性红斑狼疮;甘氨酸、丝氨酸和苏氨酸代谢;利什曼病	C02737	neg	Lipids	Phospholipids	Metabolism;Metabolism;Human Diseases;Human Diseases;Metabolism;Human Diseases	Global and overview maps;Lipid metabolism;Infectious disease: parasitic;Immune disease;Amino acid metabolism;Infectious disease: parasitic	Lipids and lipid-like molecules	Glycerophospholipids	816.575	0.20626	0	87.2	-1.31583	-	Glycerophosphoserines	6.322	6.373	6.166	6.29	6.144	6.176	6.217	6.06	6.207	6.233	6.456	6.225	6.356	6.156	6.32	6.339	6.261	6.293	6.21	6.457	6.306	6.235	6.073
neg_1078	Adrenic Acid	肾上腺酸	metab_10717	B(i)	map01040;map04216	Biosynthesis of unsaturated fatty acids;Ferroptosis	PW_C001506;HMDB0002226;LMFA01030178;LMFA04000050	M-H, 2M-H	C22H36O2	6.7467	不饱和脂肪酸的生物合成;铁死亡	C16527	neg	-	-	Metabolism;Cellular Processes	Lipid metabolism;Cell growth and death	Lipids and lipid-like molecules	Fatty Acyls	331.264	0.0222462213548	49.5	0	-1.21813	28874-58-0	Fatty acids and conjugates	5.295	5.386	5.396	5.346	5.522	5.244	5.404	5.247	5.238	5.297	5.559	5.316	5.396	5.168	5.229	5.262	5.474	5.519	5.132	5.608	5.212	5.4	5.352
neg_1088	9(S)-HpOTrE	-	metab_10728	B(i)	map00592	alpha-Linolenic acid metabolism	-	M-H2O-H, M-H	C18H30O4	6.3203	α-亚麻酸代谢	C16321	neg	-	-	Metabolism	Lipid metabolism	-	-	309.207	0.00776151609525	34.5	0	-1.17837	111004-08-1	-	5.53	5.411	5.37	5.409	5.545	5.446	5.513	5.514	5.387	5.532	5.427	5.506	5.464	5.567	5.423	5.546	5.467	5.267	5.651	5.341	5.438	5.32	5.513
neg_1089	DG(15:0/0:0/20:5(5Z,8Z,11Z,14Z,16E)-OH(18R))	-	metab_10729	B(ii)	-	-	HMDB0295313	M-H2O-H, M-H	C38H64O6	6.784	-	-	neg	-	-	-	-	Not Available	Not Available	597.45	0.111259	0	34.7	-4.08113	-	Not Available	5.488	5.481	5.551	5.605	5.713	5.496	5.457	5.514	5.511	5.525	5.496	5.407	5.38	5.501	5.458	5.507	5.341	5.42	5.304	5.474	5.582	5.372	5.423
neg_1092	PC(18:0/20:4(5Z,8Z,11Z,14Z))	-	metab_10733	B(ii)	map01100;map00564;map00590;map00591;map00592;map05231;map04723	Metabolic pathways;Glycerophospholipid metabolism;Arachidonic acid metabolism;Linoleic acid metabolism;alpha-Linolenic acid metabolism;Choline metabolism in cancer;Retrograde endocannabinoid signaling	LMGP01010802;HMDB0008048;PW_C004097	M+Cl, M+FA-H	C46H84NO8P	6.8053	代谢途径;甘油磷脂代谢;花生四烯酸代谢;亚油酸代谢;α-亚麻酸代谢;癌症的胆碱代谢;逆行内源性大麻素信号传导	C00157	neg	Lipids	Phospholipids	Metabolism;Metabolism;Metabolism;Metabolism;Metabolism;Human Diseases;Organismal Systems	Global and overview maps;Lipid metabolism;Lipid metabolism;Lipid metabolism;Lipid metabolism;Cancer: overview;Nervous system	Lipids and lipid-like molecules	Glycerophospholipids	854.59	0.110497	0	83.1	-1.5019	35418-59-8	Glycerophosphocholines	7.762	7.768	7.746	7.821	7.836	7.806	7.774	7.751	7.743	7.794	7.707	7.788	7.732	7.771	7.774	7.739	7.678	7.77	7.772	7.684	7.706	7.757	7.832
neg_1100	PG(i-19:0/PGF1alpha)	-	metab_10743	B(ii)	-	-	HMDB0271872	M+Na-2H, M+FA-H	C45H85O13P	6.8159	-	-	neg	-	-	-	-	Not Available	Not Available	885.549	0.00627725895326	0	52.5	1.52188803186656	-	Not Available	7.334	7.296	7.243	7.142	6.865	7.056	6.892	7.08	7.233	7.264	6.984	7.273	7.384	7.357	7.338	7.358	7.325	7.288	7.366	7.336	7.2	7.188	7.231
neg_1104	Triptohypol F	曲普索莫尔F	metab_10747	B(ii)	-	-	HMDB0035495	M-H2O-H, M+FA-H	C31H52O2	6.8212	-	-	neg	-	-	-	-	Lipids and lipid-like molecules	Prenol lipids	501.394	0.0454744480899	0	70.5	-1.14081	268541-26-0	Triterpenoids	6.256	6.457	6.451	6.299	6.446	6.363	6.226	6.259	6.326	6.419	6.308	6.203	6.158	6.35	6.349	6.427	6.173	6.128	6.392	6.217	6.425	6.265	6.346
neg_111	TXB2	-	metab_10753	B(i)	map00590;map01100;map04976;map04726	Arachidonic acid metabolism;Metabolic pathways;Bile secretion;Serotonergic synapse	LMFA03030002;HMDB0003252	M+Na-2H, 2M-H, M-H	C20H34O6	6.1026	花生四烯酸代谢;代谢途径;胆汁分泌;5-羟色胺能突触	C05963	neg	Lipids	Eicosanoids	Metabolism;Metabolism;Organismal Systems;Organismal Systems	Lipid metabolism;Global and overview maps;Digestive system;Nervous system	Lipids and lipid-like molecules	Fatty Acyls	369.228	0.00734254346323	63.2	0	-1.53106	54397-85-2	Eicosanoids	6.85	6.675	6.702	6.634	6.738	6.713	6.874	6.572	6.798	6.79	6.741	6.789	6.647	6.77	6.836	6.787	6.876	6.708	6.653	6.828	6.477	6.661	6.749
neg_112	5-trans-PGE2	5-反式-地诺前列酮	metab_10764	B(i)	map01100;map05140;map05143;map05163;map05146;map05200;map00590;map05323;map04976;map04080;map04024;map04923;map04750;map04924;map04921;map05165;map04726;map04625	Metabolic pathways;Leishmaniasis;African trypanosomiasis;Human cytomegalovirus infection;Amoebiasis;Pathways in cancer;Arachidonic acid metabolism;Rheumatoid arthritis;Bile secretion;Neuroactive ligand-receptor interaction;cAMP signaling pathway;Regulation of lipolysis in adipocytes;Inflammatory mediator regulation of TRP channels;Renin secretion;Oxytocin signaling pathway;Human papillomavirus in…	HMDB0001220;LMFA03010148	M-H, M+Cl, M-H2O-H	C20H32O5	6.1292	代谢途径;利什曼病;非洲锥虫病;人巨细胞病毒感染;阿米巴病;癌症的发病通路;花生四烯酸代谢;类风湿性关节炎;胆汁分泌;神经活性配体-受体相互作用;cAMP信号通路;脂肪细胞脂解的调控;TRP通道的炎症介质调节;肾素分泌;催产素信号通路;人乳头瘤病毒感染;5-羟色胺能突触;C型凝集素受体信号通路	C00584	neg	Lipids	Eicosanoids	Metabolism;Human Diseases;Human Diseases;Human Diseases;Human Diseases;Human Diseases;Metabolism;Human Diseases;Organismal Systems;Environmental Information Processing;Environmental Information Processing;Organismal Systems;Organismal Systems;Organismal Systems;Organismal Systems;Human Diseases;Organismal Systems;Organismal Systems	Global and overview maps;Infectious disease: parasitic;Infectious disease: parasitic;Infectious disease: viral;Infectious disease: parasitic;Cancer: overview;Lipid metabolism;Immune disease;Digestive system;Signaling molecules and interaction;Signal transduction;Endocrine system;Sensory system;Endocrine system;Endocrine system;Infectious disease: viral;Nervous system;Immune system	Lipids and lipid-like molecules	Fatty Acyls	351.217	0.0341142002157	86.4	0	-1.11657	363-24-6	Eicosanoids	5.655	5.17	5.274	5.123	5.405	5.355	5.879	5.322	5.774	5.673	5.486	5.34	5.478	5.502	5.658	5.623	5.679	5.499	5.093	5.662	5.251	5.261	5.317
neg_1122	PE(22:1(13Z)/15:0)	-	metab_10767	B(ii)	map01100;map00564;map00563;map04136;map05167;map04723;map04140	Metabolic pathways;Glycerophospholipid metabolism;Glycosylphosphatidylinositol (GPI)-anchor biosynthesis;Autophagy - other;Kaposi sarcoma-associated herpesvirus infection;Retrograde endocannabinoid signaling;Autophagy - animal	HMDB0009516;PW_C005564	M+Cl, M+FA-H	C42H82NO8P	6.8797	代谢途径;甘油磷脂代谢;糖基磷脂酰肌醇（GPI）-锚定生物合成;自噬-其他;卡波西肉瘤相关疱疹病毒感染;逆行内源性大麻素信号传导;自噬-动物	C00350	neg	Lipids	Phospholipids	Metabolism;Metabolism;Metabolism;Cellular Processes;Human Diseases;Organismal Systems;Cellular Processes	Global and overview maps;Lipid metabolism;Glycan biosynthesis and metabolism;Transport and catabolism;Infectious disease: viral;Nervous system;Transport and catabolism	Lipids and lipid-like molecules	Glycerophospholipids	804.575	0.0900583221963	0	84	-1.46029	-	Glycerophosphoethanolamines	7.323	7.312	7.322	7.234	7.338	7.37	7.274	7.42	7.261	7.402	7.3	7.314	7.273	7.209	7.338	7.182	7.296	7.268	7.338	7.269	7.282	7.212	7.261
neg_1129	Sativic acid	洒剔酸	metab_10774	B(ii)	-	-	HMDB0302836;LMFA02000148	M-H2O-H, 2M-H	C18H36O6	6.8212	-	-	neg	-	-	-	-	Lipids and lipid-like molecules	Fatty Acyls	329.233	0.0416024842565	0	36.2	-0.971245	-	Fatty acids and conjugates	5.063	5.096	5.044	5.131	5.094	5.007	5.043	4.983	5.048	5.154	5.106	5.024	5.06	5.089	5.043	5.049	5.04	5.089	5.289	5.1	4.996	4.979	5.054
neg_113	(2R,4Z)-4-Hepten-2-ol	（2R，4Z）-4-庚烯-2-醇	metab_10775	B(ii)	-	-	LMFA05000550;HMDB0041320	M+FA-H, 2M+Hac-H, M-H	C7H14O	6.1345	-	-	neg	-	-	-	-	Lipids and lipid-like molecules	Fatty Acyls	287.222	0.0177493654188	0	42.3	-1.4482	124753-74-8	Fatty alcohols	5.121	4.988	4.984	4.906	5.087	5.011	4.82	5.021	4.666	5.267	5.286	4.986	4.924	5.323	4.913	5.055	4.92	4.695	5.363	4.9	4.88	4.495	5.035
neg_1148	Ximenic acid	西门木烯酸	metab_10795	B(ii)	-	-	LMFA01030095;HMDB0062452;HMDB0035215	M-H, M+FA-H	C26H50O2	7.0234	-	C17278	neg	-	-	-	-	Lipids and lipid-like molecules	Fatty Acyls	393.373	0.0584386916362	0	44.8	-1.89782	66274-43-9	Fatty acids and conjugates	4.991	4.852	5.046	5.249	4.592	5.04	5.084	4.947	5.079	5.135	5.222	5.022	4.865	4.968	5.127	4.853	5.202	5.09	4.787	5.183	5.01	4.958	4.98
neg_1156	PG(PGF1alpha/i-19:0)	-	metab_10804	B(ii)	-	-	HMDB0271873	M+Na-2H, M+FA-H	C45H85O13P	7.0394	-	-	neg	-	-	-	-	Not Available	Not Available	885.549	0.0120210653774	0	43.5	1.5870397393426103	-	Not Available	7.516	7.51	7.438	7.351	7.171	7.377	7.137	7.408	7.424	7.443	7.237	7.52	7.567	7.588	7.554	7.523	7.476	7.479	7.538	7.489	7.365	7.45	7.452
neg_116	Allocholic acid	-	metab_10808	B(ii)	-	-	LMST04010092;HMDB0000505	M-H, M+Cl, M+FA-H	C24H40O5	6.1769	-	C17737	neg	-	-	-	-	Lipids and lipid-like molecules	Steroids and steroid derivatives	453.285	0.00421421826705	0	63.8	-1.68936	2464-18-8	Bile acids, alcohols and derivatives	7.141	7.093	6.987	7.192	7.069	7.095	7.171	7.183	7.199	7.341	7.163	7.237	7.141	7.329	6.927	7.193	7.189	6.805	7.508	7.047	7.327	7.01	7.353
neg_117	3a,7b,12a-Trihydroxyoxocholanyl-Glycine	3A，7B，12A -三羟基胆酰甘氨酸	metab_10819	B(ii)	-	-	HMDB0000331;LMST05030007	M-H, M+Cl, 2M-H	C26H43NO6	6.1822	-	-	neg	-	-	-	-	Lipids and lipid-like molecules	Steroids and steroid derivatives	464.301	0.0289830418165	0	43.2	-1.60457	68753-51-5	Bile acids, alcohols and derivatives	6.371	6.361	6.814	6.14	6.455	6.537	7.041	6.844	6.888	6.415	6.521	6.565	6.883	6.648	6.669	6.733	6.231	6.429	6.631	6.172	6.993	6.634	6.663
neg_1172	(+/-)-3-Hydroxynonanoic acid	-	metab_10822	B(ii)	-	-	HMDB0031513	M-H, M+Cl	C9H18O3	7.1302	-	-	neg	-	-	-	-	Organic acids and derivatives	Hydroxy acids and derivatives	209.095	0.0118784978674	0	55.4	-2.26705	88930-09-0	Medium-chain hydroxy acids and derivatives	5.476	5.502	5.47	5.485	5.486	5.487	5.451	5.456	5.45	5.513	5.481	5.495	5.453	5.456	5.485	5.446	5.444	5.463	5.474	5.477	5.425	5.437	5.497
neg_1179	Cer(d18:1/24:1(15Z))	-	metab_10829	B(ii)	map01100;map05140;map00600;map04722;map04920;map04071;map05415;map04217;map04933;map04931	Metabolic pathways;Leishmaniasis;Sphingolipid metabolism;Neurotrophin signaling pathway;Adipocytokine signaling pathway;Sphingolipid signaling pathway;Diabetic cardiomyopathy;Necroptosis;AGE-RAGE signaling pathway in diabetic complications;Insulin resistance	LMSP02010009;HMDB0004953	M+Cl, M+FA-H	C42H81NO3	7.1302	代谢途径;利什曼病;鞘脂代谢;神经营养因子信号通路;脂肪细胞因子信号通路;鞘脂信号通路;糖尿病性心肌病;程序性坏死;糖尿病并发症中的AGE-RAGE信号通路;胰岛素抵抗	C00195	neg	-	-	Metabolism;Human Diseases;Metabolism;Organismal Systems;Organismal Systems;Environmental Information Processing;Human Diseases;Cellular Processes;Human Diseases;Human Diseases	Global and overview maps;Infectious disease: parasitic;Lipid metabolism;Nervous system;Endocrine system;Signal transduction;Cardiovascular disease;Cell growth and death;Endocrine and metabolic disease;Endocrine and metabolic disease	Lipids and lipid-like molecules	Sphingolipids	692.619	0.0733889893093	0	83.2	-1.96653	-	Ceramides	5.891	4.786	5.911	5.999	6.102	5.994	5.814	5.811	5.888	6.03	5.948	6.047	5.86	5.822	5.818	4.645	5.777	5.897	5.894	5.847	5.869	5.748	5.926
neg_1181	DG(2:0/18:1(9Z)-O(12,13)/0:0)	-	metab_10832	B(ii)	-	-	HMDB0296971	M+Cl, M+FA-H	C23H40O6	7.1302	-	-	neg	-	-	-	-	Not Available	Not Available	447.251	0.0545883141135	0	38.6	-1.54961	-	Not Available	4.814	5.185	4.931	4.991	4.704	4.705	4.885	4.9	4.729	4.953	4.71	4.761	4.842	4.991	4.776	4.524	4.965	4.763	4.905	4.758	4.653	4.687	4.459
neg_1188	PE(P-18:0/20:4)	-	metab_10839	B(i)	map01100;map00564;map00563;map04136;map05167;map04723;map04140	Metabolic pathways;Glycerophospholipid metabolism;Glycosylphosphatidylinositol (GPI)-anchor biosynthesis;Autophagy - other;Kaposi sarcoma-associated herpesvirus infection;Retrograde endocannabinoid signaling;Autophagy - animal	HMDB0005779;LMGP02030003;HMDB0060631	M-H, M+Cl	C43H78NO7P	7.1248	代谢途径;甘油磷脂代谢;糖基磷脂酰肌醇（GPI）-锚定生物合成;自噬-其他;卡波西肉瘤相关疱疹病毒感染;逆行内源性大麻素信号传导;自噬-动物	C00350	neg	Lipids	Phospholipids	Metabolism;Metabolism;Metabolism;Cellular Processes;Human Diseases;Organismal Systems;Cellular Processes	Global and overview maps;Lipid metabolism;Glycan biosynthesis and metabolism;Transport and catabolism;Infectious disease: viral;Nervous system;Transport and catabolism	Lipids and lipid-like molecules	Glycerophospholipids	750.543	0.0361566	93.6	0	-1.17834	144371-69-7	Glycerophosphoethanolamines	6.233	6.376	6.313	6.375	6.253	6.113	6.229	6.303	6.134	6.417	6.306	6.155	6.203	6.183	6.228	6.208	6.212	6.179	6.116	6.258	6.179	6.18	6.257
neg_1191	PS(22:6(4Z,7Z,11E,13Z,15E,19Z)-2OH(10S,17)/22:0)	-	metab_10843	B(ii)	-	-	HMDB0282961	M-H2O-H, M-H	C50H86NO12P	7.2046	-	-	neg	-	-	-	-	Not Available	Not Available	922.579	0.0576275502452	0	68.9	-3.1721	-	Not Available	5.651	5.622	5.592	5.748	5.703	5.666	5.435	5.635	5.658	5.638	5.5	5.67	5.584	5.604	5.67	5.564	5.56	5.657	5.621	5.529	5.518	5.636	5.755
neg_120	Uridine	尿苷	metab_10853	B(i)	map00240;map01100;map02010;map01232	Pyrimidine metabolism;Metabolic pathways;ABC transporters;Nucleotide metabolism	PW_C000202;HMDB0000296;MJDBOTE0000788	M-H, M+FA-H, M+Cl	C9H12N2O6	1.7561	嘧啶代谢;代谢途径;ABC转运器;核苷酸代谢	C00299	neg	Nucleic acids	Nucleosides	Metabolism;Metabolism;Environmental Information Processing;Metabolism	Nucleotide metabolism;Global and overview maps;Membrane transport;Global and overview maps	Nucleosides, nucleotides, and analogues	Pyrimidine nucleosides	279.039	0.0136777949869	73	0	-1.38678	58-96-8	Not Available	5.95	5.969	6.03	6.107	5.961	5.99	6.103	5.993	6.009	6.163	6.19	6.098	6.009	6.039	6.027	5.966	5.985	5.988	6.015	5.963	6.266	6.056	6
neg_1203	DG(LTE4/i-19:0/0:0)	-	metab_10857	B(ii)	-	-	HMDB0299832	M-H2O-H, M+K-2H	C45H79NO8S	7.2849	-	-	neg	-	-	-	-	Not Available	Not Available	774.528	0.0218719334343	0	80.4	-8.29081	-	Not Available	5.898	5.878	5.879	5.697	5.992	5.886	6.02	5.914	5.687	6.061	5.96	5.952	5.813	6.009	5.873	5.919	5.84	5.922	6	5.984	5.871	5.771	6.021
neg_1204	Tulathromycin A	土拉霉素A	metab_10858	B(ii)	-	-	HMDB0259324	M+K-2H, M+FA-H	C41H79N3O12	7.2795	-	C21788	neg	-	-	-	-	Organic oxygen compounds	Organooxygen compounds	850.559	0.0134997230693	0	87	-6.66155	217500-96-4	Carbohydrates and carbohydrate conjugates	7.74	7.728	7.675	7.745	7.782	7.734	7.752	7.654	7.669	7.711	7.708	7.698	7.664	7.599	7.6	7.671	7.628	7.7	7.673	7.611	7.661	7.607	7.733
neg_1206	PC(20:3(5Z,8Z,11Z)/20:5(5Z,8Z,11Z,14Z,17Z))	-	metab_10860	B(ii)	map01100;map00564;map00590;map00591;map00592;map05231;map04723	Metabolic pathways;Glycerophospholipid metabolism;Arachidonic acid metabolism;Linoleic acid metabolism;alpha-Linolenic acid metabolism;Choline metabolism in cancer;Retrograde endocannabinoid signaling	HMDB0008380;PW_C004428	M+Cl, M+FA-H	C48H80NO8P	7.1088	代谢途径;甘油磷脂代谢;花生四烯酸代谢;亚油酸代谢;α-亚麻酸代谢;癌症的胆碱代谢;逆行内源性大麻素信号传导	C00157	neg	Lipids	Phospholipids	Metabolism;Metabolism;Metabolism;Metabolism;Metabolism;Human Diseases;Organismal Systems	Global and overview maps;Lipid metabolism;Lipid metabolism;Lipid metabolism;Lipid metabolism;Cancer: overview;Nervous system	Lipids and lipid-like molecules	Glycerophospholipids	874.56	0.00980629333058	0	85.1	-0.883666	-	Glycerophosphocholines	6.723	6.689	6.755	6.819	6.859	6.784	6.83	6.598	6.611	6.75	6.743	6.677	6.618	6.609	6.622	6.614	6.584	6.654	6.772	6.59	6.727	6.632	6.762
neg_121	Tanacetol A	-	metab_10864	B(ii)	-	-	HMDB0035722	M+Cl, 2M-H, M-H	C17H26O4	6.2406	-	-	neg	-	-	-	-	Lipids and lipid-like molecules	Prenol lipids	293.177	0.0243486566264	0	30.5	3.00490974664017	86778-06-5	Sesquiterpenoids	5.919	5.984	6.007	6.102	5.993	6.038	6.031	6.022	5.992	5.972	5.982	5.901	5.855	5.914	5.847	5.976	5.926	5.96	5.934	5.923	5.926	5.912	5.947
neg_1219	PE(18:2(9Z,12Z)/18:0)	-	metab_10874	B(ii)	map01100;map00564;map00563;map04136;map05167;map04723;map04140	Metabolic pathways;Glycerophospholipid metabolism;Glycosylphosphatidylinositol (GPI)-anchor biosynthesis;Autophagy - other;Kaposi sarcoma-associated herpesvirus infection;Retrograde endocannabinoid signaling;Autophagy - animal	HMDB0009090;PW_C005138;LMGP02011193	M+Na-2H, M+FA-H	C41H78NO8P	7.4772	代谢途径;甘油磷脂代谢;糖基磷脂酰肌醇（GPI）-锚定生物合成;自噬-其他;卡波西肉瘤相关疱疹病毒感染;逆行内源性大麻素信号传导;自噬-动物	C00350	neg	Lipids	Phospholipids	Metabolism;Metabolism;Metabolism;Cellular Processes;Human Diseases;Organismal Systems;Cellular Processes	Global and overview maps;Lipid metabolism;Glycan biosynthesis and metabolism;Transport and catabolism;Infectious disease: viral;Nervous system;Transport and catabolism	Lipids and lipid-like molecules	Glycerophospholipids	788.544	0.0200504662979	0	80.5	-1.09749	-	Glycerophosphoethanolamines	6.299	6.207	6.243	6.158	6.078	6.2	6.05	6.226	6.139	6.394	6.168	6.315	6.143	6.408	6.283	6.225	6.186	6.149	6.372	6.185	6.201	6.022	6.25
neg_1228	17-Aminogeldanamycin	-	metab_10884	B(ii)	-	-	HMDB0259661	M-H, M+Na-2H	C28H39N3O8	7.5093	-	-	neg	-	-	-	-	Phenylpropanoids and polyketides	Macrolactams	544.268	0.0175731190738	0	68.4	2.1026223154042802	-	Not Available	6.829	6.805	6.902	6.815	6.784	6.827	6.929	6.706	6.891	6.885	6.938	6.82	6.749	6.768	6.841	6.812	6.899	6.769	6.758	6.828	6.566	7.019	6.788
neg_1231	GPSer(18:3/4:0)	-	metab_10888	B(i)	-	-	-	M-H2O-H, M-H	C28H48NO10P	7.5147	-	-	neg	-	-	-	-	-	-	570.283	0.0352377271212	58.6	0	-0.429582	-	-	5.365	5.226	5.152	4.995	4.885	5.122	5.18	4.994	5.211	5.501	5.295	5.405	5.053	5.238	5.153	5.201	5.494	4.944	4.967	5.281	4.724	5.384	5.176
neg_1236	L-a-Lysophosphatidylserine	-	metab_10893	B(i)	-	-	-	M-H, M+Na-2H	C24H48NO9P	7.5147	-	-	neg	-	-	-	-	-	-	524.299	0.00691977889758	97.1	0	-0.573608	-	-	6.099	6.092	6.141	6.107	5.998	6.067	6.241	5.977	6.115	6.336	6.326	6.272	6.029	6.202	6.155	6.077	6.19	5.98	6.128	6.207	5.856	6.159	6.088
neg_1237	LysoPS(18:2(9Z,12Z)/0:0)	-	metab_10894	B(ii)	-	-	HMDB0240604	M-H, M+Na-2H	C24H44NO9P	7.5147	-	-	neg	-	-	-	-	Lipids and lipid-like molecules	Glycerophospholipids	520.268	0.0233449795557	0	87.9	-1.04863	1218913-82-6	Glycerophosphoserines	6.179	6.115	6.191	6.033	5.957	6.107	6.165	5.981	6.155	6.152	6.256	6.19	5.935	6.071	6.216	6.103	6.168	5.932	6.086	6.106	5.773	6.154	5.98
[truncated: 1,157 more rows]
[truncated: 10 more columns]
